# Supplementary material for: nN → π*Ar interactions stabilize the E-ac isomers of arylhydrazides and facilitate their SNAr autocyclizations
Source: Royal Society of Chemistry journal article supplement (doi:10.1039/d1cc04533d), 2021-01-01
Supplement: d1cc04533d1.pdf [file d1cc04533d1.pdf]

## Supporting Information

### **$n_N \rightarrow \pi^*_{Ar}$ interactions stabilize the E-ac isomers of arylhydrazides and facilitate their $S_NAr$ autocyclizations**

Jugal Kishore Rai Deka<sup>b</sup>, Debajit Kalita<sup>a</sup>, Biwajit Sahariah<sup>a</sup> and Bani Kanta Sarma<sup>a\*</sup>

<sup>a</sup>New Chemistry Unit, Jawaharlal Nehru Centre for Advanced Scientific Research (JNCASR), Bangalore 560064, India

<sup>b</sup>Department of Chemistry, School of Natural Sciences, Shiv Nadar University, Dadri, Uttar Pradesh 201314, India

| Table of contents                                  | Page No.  |
|----------------------------------------------------|-----------|
| A. General experimental information                | S2        |
| B. X-ray crystal structure determination method    | S2-S3     |
| C. 2D NOESY studies                                | S3        |
| D. Computational studies                           | S3        |
| E. Synthetic protocols and characterization        | S4-S27    |
| F. Supplementary figure and tables                 | S28-S37   |
| G. Kinetics studies                                | S38-S41   |
| H. 2D NOESY spectra                                | S42-S77   |
| I. Cartesian coordinates                           | S78-S93   |
| J. NMR Spectra for all newly synthesized compounds | S94-S157  |
| K. References                                      | S158-S159 |

## A. General Experimental Information.

All reagents were purchased from commercial sources (Sigma-Aldrich, Alfa Aesar, Spectrochem, CDH, BLD pharm and TCI) and were used without further purification. Anhydrous solvents for reaction purposes were purchased from commercial sources (Chemlabs, Finar and Rankem) and were used without further purification. Column chromatography was performed on silica gel (100-200 mesh particle size) as a stationary phase using commercial solvents as mobile phase (hexane and ethylacetate). The reactions were monitored by thin layer chromatography (TLC) on silica gel 60 F<sub>254</sub> (Merck). The NMR spectra were recorded in CDCl<sub>3</sub>, [CD<sub>3</sub>]<sub>2</sub>SO, CD<sub>3</sub>OD, CD<sub>3</sub>CN and D<sub>2</sub>O or as stated deuterated solvents. <sup>1</sup>H (400 MHz), <sup>13</sup>C (100 MHz) and <sup>19</sup>F (376 MHz) NMR were obtained on Bruker 400 MHz NMR spectrometer using tetramethylsilane (TMS) as an internal standard. <sup>1</sup>H and <sup>19</sup>F NMR spectra were recorded at ambient temperature in five different deuterated solvents which are CDCl<sub>3</sub>, [CD<sub>3</sub>]<sub>2</sub>SO, CD<sub>3</sub>OD, CD<sub>3</sub>CN and D<sub>2</sub>O. <sup>13</sup>C NMR spectra were recorded only in CDCl<sub>3</sub> at ambient temperature. Chemical shifts ( $\delta$ ) are reported in part per million (ppm) relative to residual undeuterated solvent as an internal reference (<sup>1</sup>H:  $\delta$  7.26 ppm for CDCl<sub>3</sub>; <sup>13</sup>C:  $\delta$  77.16 ppm for CDCl<sub>3</sub>,  $\delta$  2.50 ppm for [CD<sub>3</sub>]<sub>2</sub>SO,  $\delta$  3.31 ppm for CD<sub>3</sub>OD,  $\delta$  1.94 ppm for CD<sub>3</sub>CN,  $\delta$  4.79 ppm for D<sub>2</sub>O). Chemical shifts for fluorine are reported in parts per million from CFCl<sub>3</sub>, [CF<sub>3</sub>]<sub>2</sub>SO, CF<sub>3</sub>OF, CF<sub>3</sub>CN, F<sub>2</sub>O ( $\delta$  0 ppm) as the external standard. Abbreviations of NMR peak multiplicities were explained as s = singlet, d = doublet, t = triplet, q = quartet, m = multiplet, brs and brd = broad singlet and doublet signals. NMR data were processed by using MestReNova software. HRMS data were obtained using “6540 UHD Accurate-Mass Q-TOF LC/MS system (Agilent Technologies, Santa Clara, CA, USA) equipped with Agilent 1290 UPLC system”. In case of isotopic pattern, we reported the highest intensity peak mass.

## B. X-ray crystal structure determination method

Single crystal structures of the compounds were determined by measuring x-ray intensity data on a D8 venture APEX 3<sup>1</sup> X-ray diffractometer equipped with monochromatised micro-focus sources of Mo K $\alpha$  radiation ( $\lambda$ = 0.71073 Å). Data collection were done in phi ( $\phi$ ) and omega ( $\omega$ ) scan strategy at room temperature (295-302K). Data was processed by SAINT<sup>2</sup> and absorption correction was done using SADABS<sup>3</sup> implemented in APEX 3. The structures were solved by using XSHELL program based on SHELX<sup>4</sup> program implemented in APEX 3 and Olex2 1.3 (Dolomanov et al., 2009) (compiled 2020.06.28 svn.raecde09e for Olexsys, GUI svn.r6132). The non-hydrogen atoms were refined anisotropically and all the hydrogen atoms

were assigned in idealized locations. All the structures were deposited in the CCDC<sup>5</sup> (CCDC No: **2087868-2087870**, **2088424**, **2093749** and **2093793**) database.

### C. 2D-NOESY studies

2D gradient Nuclear Overhauser Effect Spectroscopy (NOESY) <sup>1</sup>H-<sup>1</sup>H Correlation (spin-lattice relaxation) NMR experiments were performed on a Bruker 400 MHz spectrometer using the following parameters – 5 mm PABBO BB/ probe, noesygpplpp pulse sequence, NS = 4 or 8 (number of scans, 8\*n), DS = 32 (numbers of dummy scans were run prior to acquisition), D1= 1.98976004 sec (relaxation delay or mixing time between 1- 5 sec) and P1= 12.85 usec (<sup>1</sup>H 90° pulse).

### D. Computational Studies

All the calculations were performed by using Gaussian09 suite quantum chemistry program.<sup>6</sup> We optimized each conformer using the hybrid Minnesota functional (M06-2X)/6-311+G(2d,p) level of theory.<sup>7</sup> Frequency calculations were also done at the same level of theory. The stabilization energies due to the orbital interactions were evaluated using Natural Bond Orbital (NBO)<sup>8</sup> analyses. Noncovalent Interaction (NCI)<sup>9</sup> analyses were done with Multiwfn<sup>10</sup> software. For the NCI plots, we used VMD<sup>11</sup> graphical visualization software. To visualize the structures and determine the crystallographic parameters, Chemcraft<sup>12</sup> graphical visualization software was used. We observed that two  $\pi^*$  (C=C) acceptor orbitals of the phenyl rings are involved in the  $n_{N\beta} \rightarrow \pi^*_{Ar}$  interaction (Figure S3). There are four and eight isomers possible in symmetrical ( $R_2 = R_3$ ) (Figure S1) and unsymmetrical ( $R_2 \neq R_3$ ) (Figure S2) acylhydrazides, respectively, depending on whether the two substituents on the  $\beta$ -nitrogen atom  $R_2$  and  $R_3$  are same or different. In the unsymmetrical arylhydrazides (Figure S2), we used additional bH and fH designations for the isomers. For this purpose, the molecules were viewed by keeping the R-CO-N-N moiety in the plane of the screen by keeping R to the left and N-N to the right of the CO group and the viewer. In such a view, if the hydrogen on the  $\beta$ -nitrogen was pointed towards the viewer (frontside) fH designation was used and if the hydrogen on the  $\beta$ -nitrogen was pointed away from the viewer (backside) bH designation was used.

## E. Synthetic protocols and characterizations

### 1. General Scheme for the synthesis of *N,N'*-dimethyl-monoacylhydrazines 7-12:

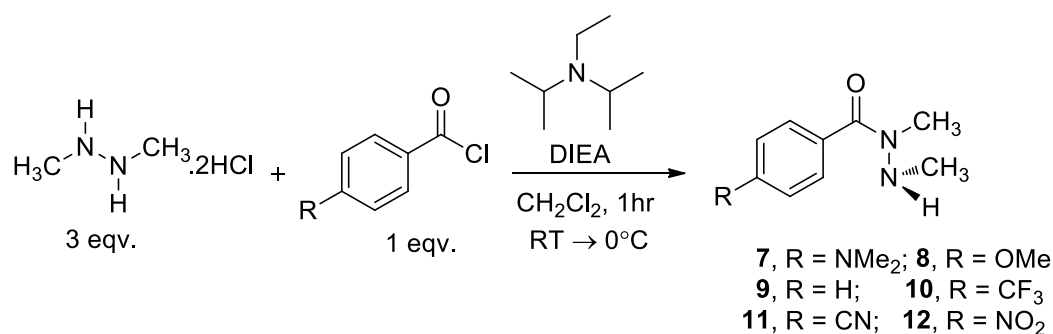

#### Procedure:

x mg of 1,2-Dimethylhydrazine-dihydrochloride [y mmol (3 eqv.)] were neutralized by using x'  $\mu$ L of N, N-diisopropylethylamine [DIEA-y' mmol (7 eqv.)] in CH<sub>2</sub>Cl<sub>2</sub> (15 mL) at room temperature and stirred for 15 minutes. The reaction mixture was allowed to cool to 0° C and stirred for another 5 minutes. Then x'' mg/  $\mu$ L of Acyl chloride [y'' mmol (1 eqv.)] in CH<sub>2</sub>Cl<sub>2</sub> (2 mL) were added drop-wise manner to a reaction mixture over 10 minutes and stirred for another 30 minutes. The solvent was evaporated to dryness by using the rotary evaporator. Then the reaction mixture was dissolved in CH<sub>2</sub>Cl<sub>2</sub> and washed twice with water, then a 10% citric acid solution followed by a saturated sodium bicarbonate (NaHCO<sub>3</sub>) solution and finally with brine solution. The organic layer was dried over Na<sub>2</sub>SO<sub>4</sub> and evaporated under reduced pressure. The final residue was then purified by the Column chromatography using Silica Gel (100-200 Mesh) and gradient of Hexane and ethyl acetate as an eluent.

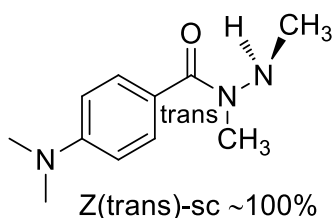

Compound **7**: 4-(dimethylamino)-*N,N'*-dimethylbenzohydrazide.

x = 217 mg of 1,2-Dimethylhydrazine-dihydrochloride [y = 1.63 mmol (3 eqv.)], x' = 652  $\mu$ L of N, N-diisopropylethylamine [DIEA (y') = 3.81 mmol (7 eqv.)] and x'' = 100 mg of 4-(dimethylamino)benzoyl chloride [y'' = 0.545 mmol (1 eqv.)]. Yield (%): 85 % as a semi-liquid.

$^1\text{H}$  NMR 400 MHz (20mM,  $\text{CDCl}_3$ )  $\delta$  ppm Z(trans)-sc rotamer (~100 %): 7.46 [d, 2H,  $J = 8.0$  Hz, Ph- $\text{N}(\text{CH}_3)_2$ ], 6.66 [d, 2H,  $J = 8.0$  Hz, Ph- $\text{N}(\text{CH}_3)_2$ ], 5.46 [brs, 1H, NH-( $\text{CH}_3$ )], 3.22 [s, 3H, C(O)NCH $_3$ ], 3.00 [s, 6H, N( $\text{CH}_3$ ) $_2$ ], 2.65 [s, 3H, H $_3$ C-N(H)];  $^1\text{H}$  NMR 400 MHz [20mM, ( $\text{CD}_3$ ) $_2$ SO]  $\delta$  ppm Z(trans)-sc rotamer (~100 %): 7.49 [d, 2H,  $J = 12.0$  Hz, Ph- $\text{N}(\text{CH}_3)_2$ ], 6.65 [d, 2H,  $J = 8.0$  Hz, Ph- $\text{N}(\text{CH}_3)_2$ ], 5.06 [brs, 1H, NH-( $\text{CH}_3$ )], 3.07 [s, 3H, C(O)NCH $_3$ ], 2.94 [s, 6H, N( $\text{CH}_3$ ) $_2$ ], 2.45 [s, 3H, H $_3$ C-N(H)];  $^1\text{H}$  NMR 400 MHz (20mM,  $\text{CD}_3\text{OD}$ )  $\delta$  ppm Z(trans)-sc rotamer (~100 %): 7.48 [brd, 2H,  $J = 8.0$  Hz, Ph- $\text{N}(\text{CH}_3)_2$ ], 6.73 [d, 2H,  $J = 8.0$  Hz, Ph- $\text{N}(\text{CH}_3)_2$ ], 3.22 [s, 3H, C(O)NCH $_3$ ], 3.00 [s, 6H, N( $\text{CH}_3$ ) $_2$ ], 2.59 [s, 3H, H $_3$ C-N(H)];  $^1\text{H}$  NMR 400 MHz (20mM,  $\text{CD}_3\text{CN}$ )  $\delta$  ppm Z(trans)-sc rotamer (~100 %): 7.45 [brd, 2H,  $J = 8.0$  Hz, Ph- $\text{N}(\text{CH}_3)_2$ ], 6.79 [d, 2H,  $J = 8.0$  Hz, Ph- $\text{N}(\text{CH}_3)_2$ ], 3.12 [s, 3H, C(O)NCH $_3$ ], 2.96 [s, 6H, N( $\text{CH}_3$ ) $_2$ ], 2.53 [s, 3H, H $_3$ C-N(H)];  $^1\text{H}$  NMR 400 MHz (20mM,  $\text{D}_2\text{O}$ )  $\delta$  ppm Z(trans)-sc rotamer (~100 %): 7.48 [d, 2H,  $J = 12.0$  Hz, Ph- $\text{N}(\text{CH}_3)_2$ ], 7.02 [d, 2H,  $J = 8.0$  Hz, Ph- $\text{N}(\text{CH}_3)_2$ ], 3.23 [s, 3H, C(O)NCH $_3$ ], 2.99 [s, 6H, N( $\text{CH}_3$ ) $_2$ ], 2.62 [brs, 3H, H $_3$ C-N(H)];  $^{13}\text{C}$  NMR (100 MHz,  $\text{CDCl}_3$ )  $\delta$  ppm Z(trans)-sc rotamer [~100 %]: 170.8, 151.7, 129.7, 121.8, 111.0, 40.3, 38.5, 36.3; HRMS [M + H] $^+$  calcd. for,  $\text{C}_{11}\text{H}_{18}\text{N}_3\text{O}$ , m/z: 208.1450; found m/z: 208.1445.

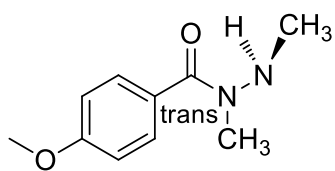

Compound **8**: 4-methoxy-*N,N'*-dimethylbenzohydrazide.

x = 234 mg of 1,2-Dimethylhydrazine-dihydrochloride [ $y = 1.76$  mmol (3 eqv.)],  $x' = 702$   $\mu$ L of N, N-diisopropylethylamine [DIEA ( $y'$ ) = 4.10 mmol (7 eqv.)] and  $x'' = 79$   $\mu$ L of 4-methoxybenzoyl chloride [ $y'' = 0.586$  mmol (1 eqv.)]. Yield (%): 82 % as a semi-liquid.

$^1\text{H}$  NMR 400 MHz (20mM,  $\text{CDCl}_3$ )  $\delta$  ppm Z(trans)-sc rotamer (~100 %): 7.48 (brd, 2H,  $J = 8.0$  Hz, Ph-OCH<sub>3</sub>), 6.90 (d, 2H,  $J = 8.0$  Hz, Ph-OCH<sub>3</sub>), 5.76 [brs, 1H, NH-(CH<sub>3</sub>)], 3.83 [s, 3H, O-CH<sub>3</sub>], 3.19 [s, 3H, C(O)NCH<sub>3</sub>], 2.65 [s, 3H, H<sub>3</sub>C-N(H)];  $^1\text{H}$  NMR 400 MHz [20mM, ( $\text{CD}_3$ )<sub>2</sub>SO]  $\delta$  ppm Z(trans)-sc rotamer (~100 %): 7.51 (brd, 2H,  $J = 8.0$  Hz, Ph-OCH<sub>3</sub>), 6.91 (brd, 2H,  $J = 8.0$  Hz, Ph-OCH<sub>3</sub>), 4.86 [brs, 1H, NH-(CH<sub>3</sub>)], 3.78 [s, 3H, O-CH<sub>3</sub>], 3.08 [s, 3H, C(O)NCH<sub>3</sub>], 2.44 [brd, 3H, H<sub>3</sub>C-N(H)];  $^1\text{H}$  NMR 400 MHz (20mM,  $\text{CD}_3\text{OD}$ )  $\delta$  ppm Z(trans)-sc rotamer (~100 %): 7.52 (brs, 2H, Ph-OCH<sub>3</sub>), 6.95 (brd, 2H,  $J = 8.0$  Hz, Ph-OCH<sub>3</sub>), 3.83 [s, 3H, O-CH<sub>3</sub>], 3.20 [s, 3H, C(O)NCH<sub>3</sub>], 2.58 [brs, 3H, H<sub>3</sub>C-N(H)];  $^1\text{H}$  NMR 400 MHz (20mM,  $\text{CD}_3\text{CN}$ )  $\delta$  ppm Z(trans)-sc rotamer (~100 %): 7.49 (brd, 2H,  $J = 8.0$  Hz, Ph-OCH<sub>3</sub>), 6.92 (d, 2H,  $J = 12.0$  Hz, Ph-OCH<sub>3</sub>), 3.81 [s, 3H, O-CH<sub>3</sub>], 3.11 [s, 3H, C(O)NCH<sub>3</sub>], 2.52 [s, 3H, H<sub>3</sub>C-N(H)];  $^1\text{H}$  NMR 400 MHz (20mM,  $\text{D}_2\text{O}$ )  $\delta$  ppm Z(trans)-sc rotamer (58 %): 7.48 (d, 2H,  $J = 8.0$  Hz, Ph-OCH<sub>3</sub>), 7.07 (brs, 2H, Ph-OCH<sub>3</sub>), 3.89 [s, 3H, O-CH<sub>3</sub>], 3.18 [s, 3H, C(O)NCH<sub>3</sub>], 2.66 [s, 3H, H<sub>3</sub>C-N(H)]; E(cis)-ac rotamer (42 %): 7.48 (d, 2H,  $J = 12.0$  Hz, Ph-OCH<sub>3</sub>), 7.07 (brs, 2H, Ph-OCH<sub>3</sub>), 3.89 [s, 3H, O-CH<sub>3</sub>], 3.25 [s, 3H, C(O)NCH<sub>3</sub>], 2.54 [s, 3H, H<sub>3</sub>C-N(H)];  $^{13}\text{C}$  NMR (100 MHz,  $\text{CDCl}_3$ )  $\delta$  ppm Z(trans)-sc rotamer [~100 %]: 170.0, 161.0, 129.6, 127.4, 113.5, 55.3, 38.0, 36.1; HRMS  $[\text{M} + \text{H}]^+$  calcd. for,  $\text{C}_{10}\text{H}_{15}\text{N}_2\text{O}_2$ ,  $m/z$ : 195.1134; found  $m/z$ : 195.1139.

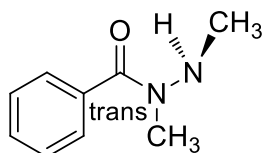

Z(trans)-sc ~100%

Compound **9**: N, N'-dimethylbenzohydrazide.

x = 284 mg of 1,2-Dimethylhydrazine-dihydrochloride [y = 2.13 mmol (3 eqv.)], x' = 851  $\mu$ L of N, N-diisopropylethylamine [DIEA (y') = 4.98 mmol (7 eqv.)] and x'' = 83  $\mu$ L of benzoyl chloride [y'' = 0.711 mmol (1 eqv.)]. Yield (%): 86 % as a semi-liquid.

$^1\text{H}$  NMR 400 MHz (20mM,  $\text{CDCl}_3$ )  $\delta$  ppm Z(trans)-sc rotamer (~100 %): 7.46-7.42 (m, 5H, Ph), 5.78 [brs, 1H, NH-(CH<sub>3</sub>)], 3.15 [brs, 3H, C(O)NCH<sub>3</sub>], 2.67 [s, 3H, H<sub>3</sub>C-N(H)];  $^1\text{H}$  NMR 400 MHz [20mM, (CD<sub>3</sub>)<sub>2</sub>SO]  $\delta$  ppm (~100 %): 7.45 (brd, 2H, J = 8.0 Hz, Ph), 7.36 (brs, 3H, Ph), 4.84 [brs, 1H, NH-(CH<sub>3</sub>)], 3.10 [brs, 3H, C(O)NCH<sub>3</sub>], 2.40 [brs, 3H, H<sub>3</sub>C-N(H)];  $^1\text{H}$  NMR 400 MHz (20mM, CD<sub>3</sub>OD)  $\delta$  ppm E(cis)-ac rotamer (56 %): 7.48-7.39 (m, 5H, Ph), 3.24 [brs, 3H, C(O)NCH<sub>3</sub>], 2.49 [brs, 3H, H<sub>3</sub>C-(NH)]; Z(trans)-sc rotamer (44 %): 7.48-7.39 (m, 5H, Ph), 3.13 [brs, 3H, C(O)NCH<sub>3</sub>], 2.66 [brs, 3H, H<sub>3</sub>C-(NH)];  $^1\text{H}$  NMR 400 MHz (20mM, CD<sub>3</sub>CN)  $\delta$  ppm E(cis)-ac rotamer (59 %): 7.44-7.39 (m, 5H, Ph), 3.90 [brs, 1H, H-N(CH<sub>3</sub>)], 3.13 [brs, 3H, C(O)NCH<sub>3</sub>], 2.49 [brs, 3H, H<sub>3</sub>C-(NH)]; Z(trans)-sc rotamer (41 %): 7.44-7.39 (m, 5H, Ph), 5.65 [brs, 1H, H-N(CH<sub>3</sub>)], 3.13 [brs, 3H, C(O)NCH<sub>3</sub>], 2.49 [brs, 3H, H<sub>3</sub>C-(NH)];  $^1\text{H}$  NMR 400 MHz (20mM, D<sub>2</sub>O)  $\delta$  ppm E(cis)-ac rotamer (50 %): 7.56-7.43 (m, 5H, Ph), 3.27 [s, 3H, C(O)NCH<sub>3</sub>], 2.51 [s, 3H, H<sub>3</sub>C-(NH)]; Z(trans)-sc rotamer (50 %): 7.56-7.43 (m, 5H, Ph), 3.13 [s, 3H, C(O)NCH<sub>3</sub>], 2.67 [s, 3H, H<sub>3</sub>C-(NH)];  $^{13}\text{C}$  NMR (100 MHz,  $\text{CDCl}_3$ )  $\delta$  ppm [~100 %]: 169.6, 135.3, 130.1, 128.4, 127.4, 37.8, 36.1; HRMS [M + H]<sup>+</sup> calcd. for, C<sub>9</sub>H<sub>13</sub>N<sub>2</sub>O, m/z: 165.1028; found m/z: 165.1031.

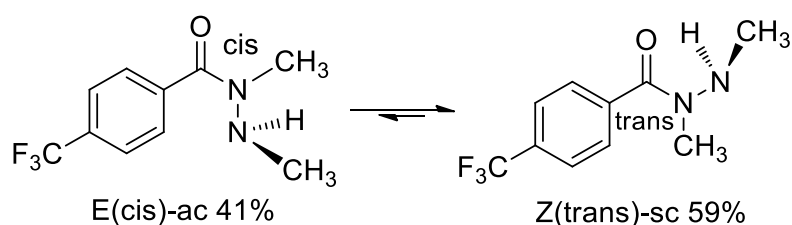

Compound **10**: *N, N'*-dimethyl-4-(trifluoromethyl)benzohydrazide.

x = 191 mg of 1,2-Dimethylhydrazine-dihydrochloride [y = 1.44 mmol (3 eqv.)], x' = 574  $\mu$ L of N, N-diisopropylethylamine [DIEA (y') = 3.36 mmol (7 eqv.)] and x'' = 71  $\mu$ L of 4-(trifluoromethyl)benzoyl chloride [y'' = 0.479 mmol (1 eqv.)]. Yield (%): 84 % as a solid.

$^1\text{H}$  NMR 400 MHz (20mM,  $\text{CDCl}_3$ )  $\delta$  ppm Z(trans)-sc rotamer (59 %): 7.66-7.59 (m, 4H, Ph- $\text{CF}_3$ ), 5.87 [brs, 1H, NH-( $\text{CH}_3$ )], 3.11 [brs, 3H, C(O)N $\text{CH}_3$ ], 2.69 [brd, 3H,  $J = 4.0$  Hz,  $\text{H}_3\text{C}$ -(NH)]; E(cis)-ac rotamer (41 %): 7.66-7.59 (m, 4H, Ph- $\text{CF}_3$ ), 3.37 [brs, 1H, NH-( $\text{CH}_3$ )], 3.28 [brs, 3H, C(O)N $\text{CH}_3$ ], 2.59 [brs, 3H,  $\text{H}_3\text{C}$ -(NH)];  $^{19}\text{F}$  NMR 376 MHz (20mM,  $\text{CDCl}_3$ )  $\delta$  ppm Z(trans)-sc rotamer (59 %): -62.95 (s, 3F, Ph- $\text{CF}_3$ ); E(cis)-ac rotamer (41 %): -62.84 (s, 3F, Ph- $\text{CF}_3$ );  $^1\text{H}$  NMR 400 MHz [20mM,  $(\text{CD}_3)_2\text{SO}$ ]  $\delta$  ppm E(cis)-ac rotamer (~100 %): 7.72 (d, 2H,  $J = 8.0$  Hz, Ph- $\text{CF}_3$ ), 7.63 (d, 2H,  $J = 8.0$  Hz, Ph- $\text{CF}_3$ ), 4.92 [q, 1H,  $J = 4.0$  Hz, NH-( $\text{CH}_3$ )], 3.13 [s, 3H, C(O)N $\text{CH}_3$ ], 2.39 [brd, 3H,  $J = 8.0$  Hz,  $\text{H}_3\text{C}$ -N(H)];  $^{19}\text{F}$  NMR 376 MHz [20mM,  $(\text{CD}_3)_2\text{SO}$ ]  $\delta$  ppm E(cis)-ac rotamer (~100 %): -61.14 (s, 3F, Ph- $\text{CF}_3$ );  $^1\text{H}$  NMR 400 MHz (20mM,  $\text{CD}_3\text{OD}$ )  $\delta$  ppm E(cis)-ac rotamer (74 %): 7.67 (brs, 4H, Ph- $\text{CF}_3$ ), 3.26 [s, 3H, C(O)N $\text{CH}_3$ ], 2.49 [s, 3H,  $\text{H}_3\text{C}$ -(NH)]; Z(trans)-sc rotamer (26 %): 7.78 (brs, 2H, Ph- $\text{CF}_3$ ), 7.67 (brs, 2H, Ph- $\text{CF}_3$ ), 3.10 [s, 3H, C(O)N $\text{CH}_3$ ], 2.68 [s, 3H,  $\text{H}_3\text{C}$ -(NH)];  $^{19}\text{F}$  NMR 376 MHz (20mM,  $\text{CD}_3\text{OD}$ )  $\delta$  ppm E(cis)-ac rotamer (74 %): -64.30 (s, 3F, Ph- $\text{CF}_3$ ); Z(trans)-sc rotamer (26 %): -64.47 (s, 3F, Ph- $\text{CF}_3$ );  $^1\text{H}$  NMR 400 MHz (20mM,  $\text{CD}_3\text{CN}$ )  $\delta$  ppm E(cis)-ac rotamer (76 %): 7.74-7.60 (m, 4H, Ph- $\text{CF}_3$ ), 3.93 [brs, 1H, H-N( $\text{CH}_3$ )], 3.17 [s, 3H, C(O)N $\text{CH}_3$ ], 2.46 [brd, 3H,  $J = 4.0$  Hz,  $\text{H}_3\text{C}$ -(NH)]; Z(trans)-sc rotamer (24 %): 7.74-7.60 (m, 4H, Ph- $\text{CF}_3$ ), 5.75 [brs, 1H, H-N( $\text{CH}_3$ )], 3.01 [s, 3H, C(O)N $\text{CH}_3$ ], 2.61 [s, 3H,  $\text{H}_3\text{C}$ -(NH)];  $^{19}\text{F}$  NMR 376 MHz (20mM,  $\text{CD}_3\text{CN}$ )  $\delta$  ppm E(cis)-ac rotamer (76 %): -63.20 (s, 3F, Ph- $\text{CF}_3$ ); Z(trans)-sc rotamer (24 %): -63.36 (s, 3F, Ph- $\text{CF}_3$ );  $^1\text{H}$  NMR 400 MHz (20mM,  $\text{D}_2\text{O}$ )  $\delta$  ppm E(cis)-ac rotamer (57 %): 7.80 (d, 2H,  $J = 8.0$  Hz, Ph- $\text{CF}_3$ ), 7.60 (d, 2H,  $J = 8.0$  Hz, Ph- $\text{CF}_3$ ), 3.28 [s, 3H, C(O)N $\text{CH}_3$ ], 2.51 [s, 3H,  $\text{H}_3\text{C}$ -(NH)]; Z(trans)-sc rotamer (43 %): 7.84 (d, 2H,  $J = 8.0$  Hz, Ph- $\text{CF}_3$ ), 7.64 (d, 2H,  $J = 8.0$  Hz, Ph- $\text{CF}_3$ ), 3.11 [s, 3H, C(O)N $\text{CH}_3$ ], 2.68 [s, 3H,  $\text{H}_3\text{C}$ -(NH)];  $^{19}\text{F}$  NMR 376 MHz



(20mM, D<sub>2</sub>O)  $\delta$  ppm E(cis)-ac rotamer (57 %): -62.69 (s, 3F, Ph-CF<sub>3</sub>); Z(trans)-sc rotamer (43 %): -62.85 (s, 3F, Ph-CF<sub>3</sub>); <sup>13</sup>C NMR (100 MHz, CDCl<sub>3</sub>)  $\delta$  ppm [Z(trans)-sc (59 %)]: 168.2, 138.9, 132.1 (q, <sup>2</sup>J<sub>CF</sub> = 30.0 Hz), 128.0-127.8 (m), 125.7 (brq, <sup>3</sup>J<sub>CF</sub> = 4.0 Hz), 121.1 (q, <sup>1</sup>J<sub>CF</sub> = 267.0 Hz), 37.8, 36.1; [E(cis)-ac (41 %)]: 171.2, 140.0, 132.1 (q, <sup>2</sup>J<sub>CF</sub> = 30.0 Hz), 128.0-127.8 (m), 124.8 (brq, <sup>3</sup>J<sub>CF</sub> = 4.0 Hz), 121.1 (q, <sup>1</sup>J<sub>CF</sub> = 267.0 Hz), 36.1, 32.9; HRMS [M + H]<sup>+</sup> calcd. for, C<sub>10</sub>H<sub>12</sub>F<sub>3</sub>N<sub>2</sub>O, m/z: 233.0902; found m/z: 233.0905.

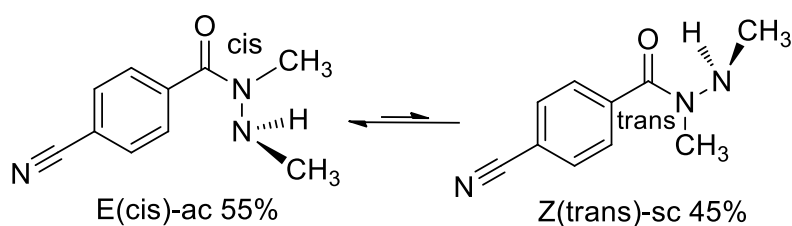

Compound **11**: 4-cyano-*N, N'*-dimethylbenzohydrazide.

x = 241 mg of 1,2-Dimethylhydrazine-dihydrochloride [y = 1.81 mmol (3 eqv.)], x' = 723  $\mu$ L of N, N-diisopropylethylamine [DIEA (y') = 4.23 mmol (7 eqv.)] and x'' = 100 mg of 4-cyanobenzoyl chloride [y'' = 0.604 mmol (1 eqv.)]. Yield (%): 80 % as a light yellow solid.

<sup>1</sup>H NMR 400 MHz (20mM, CDCl<sub>3</sub>)  $\delta$  ppm E(cis)-ac rotamer (55 %): 7.71-7.58 (m, 4H, Ph-CN), 3.41 [s, 1H, NH-(CH<sub>3</sub>)], 3.28 [s, 3H, C(O)NCH<sub>3</sub>], 2.58 [s, 3H, H<sub>3</sub>C-(NH)]; Z(trans)-sc rotamer (45 %): 7.71-7.58 (m, 4H, Ph-CN), 5.71 [s, 1H, NH-(CH<sub>3</sub>)], 3.10 [s, 3H, C(O)NCH<sub>3</sub>], 2.69 [s, 3H, H<sub>3</sub>C-(NH)]; <sup>1</sup>H NMR 400 MHz [20mM, (CD<sub>3</sub>)<sub>2</sub>SO]  $\delta$  ppm E(cis)-ac rotamer (~100 %): 7.83 (d, 2H, J = 8.0 Hz, Ph-CN), 7.58 (d, 2H, J = 8.0 Hz, Ph-CN), 4.94 [q, 1H, J = 4.0 Hz, NH-(CH<sub>3</sub>)], 3.11 [s, 3H, C(O)NCH<sub>3</sub>], 2.38 [brd, 3H, J = 4.0 Hz, H<sub>3</sub>C-N(H)]; <sup>1</sup>H NMR 400 MHz (20mM, CD<sub>3</sub>OD)  $\delta$  ppm E(cis)-ac rotamer (78 %): 7.74 (d, 2H, J = 8.0 Hz, Ph-CN), 7.64 (d, 2H, J = 8.0 Hz, Ph-CN), 3.25 [s, 3H, C(O)NCH<sub>3</sub>], 2.48 [s, 3H, H<sub>3</sub>C-(NH)]; Z(trans)-sc rotamer (22 %): 7.84 (brs, 2H, Ph-CN), 7.64 (d, 2H, J = 8.0 Hz, Ph-CN), 3.09 [s, 3H, C(O)NCH<sub>3</sub>], 2.67 [s, 3H, H<sub>3</sub>C-(NH)]; <sup>1</sup>H NMR 400 MHz (20mM, CD<sub>3</sub>CN)  $\delta$  ppm E(cis)-ac rotamer (80 %): 7.71 (d, 2H, J = 8.0 Hz, Ph-CN), 7.57 (d, 2H, J = 8.0 Hz, Ph-CN), 3.94 [brq,

1H,  $J = 4.0$  Hz, NH-(CH<sub>3</sub>)], 3.16 [s, 3H, C(O)NCH<sub>3</sub>], 2.45 [brd, 3H,  $J = 4.0$  Hz, H<sub>3</sub>C-(NH)]; Z(trans)-sc rotamer (20 %): 7.78 (brs, 2H, Ph-CN), 7.57 (d, 2H,  $J = 8.0$  Hz, Ph-CN), 5.61 [brs, 1H, NH-(CH<sub>3</sub>)], 2.99 [s, 3H, C(O)NCH<sub>3</sub>], 2.60 [s, 3H, H<sub>3</sub>C-(NH)]; <sup>1</sup>H NMR 400 MHz (20mM, D<sub>2</sub>O)  $\delta$  ppm E(cis)-ac rotamer (62 %): 7.84 (d, 2H,  $J = 8.0$  Hz, Ph-CN), 7.58 (d, 2H,  $J = 8.0$  Hz, Ph-CN), 3.26 [s, 3H, C(O)NCH<sub>3</sub>], 2.50 [s, 3H, H<sub>3</sub>C-(NH)]; Z(trans)-sc rotamer (38 %): 7.89 (d, 2H,  $J = 8.0$  Hz, Ph-CN), 7.63 (d, 2H,  $J = 8.0$  Hz, Ph-CN), 3.10 [s, 3H, C(O)NCH<sub>3</sub>], 2.67 [s, 3H, H<sub>3</sub>C-(NH)]; <sup>13</sup>C NMR (100 MHz, CDCl<sub>3</sub>)  $\delta$  ppm E(cis)-ac rotamer (55 %): 170.7, 140.9, 131.5, 128.4, 118.6, 112.8, 35.8, 32.6; Z(trans)-sc rotamer (45 %): 167.5, 139.6, 132.4, 128.0, 118.1, 113.8, 37.6, 36.0; HRMS [M + H]<sup>+</sup> calcd. for, C<sub>10</sub>H<sub>12</sub>N<sub>3</sub>O, m/z: 190.0980; found m/z: 190.0982.

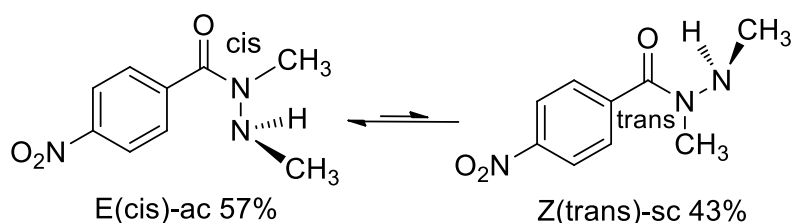

Compound **12**: *N, N'*-dimethyl-4-nitrobenzohydrazide.

$x = 215$  mg of 1,2-Dimethylhydrazine-dihydrochloride [ $y = 1.62$  mmol (3 eqv.)],  $x' = 645$   $\mu$ L of *N, N*-diisopropylethylamine [DIEA ( $y'$ ) = 3.77 mmol (7 eqv.)] and  $x'' = 100$  mg of 4-nitrobenzoyl chloride [ $y'' = 0.539$  mmol (1 eqv.)]. Yield (%): 82 % as a light yellow solid.

<sup>1</sup>H NMR 400 MHz (20mM, CDCl<sub>3</sub>)  $\delta$  ppm E(cis)-ac rotamer (57 %): 8.23 (brd, 2H,  $J = 8.0$  Hz, Ph-NO<sub>2</sub>), 7.67 (brd, 2H,  $J = 8.0$  Hz, Ph-NO<sub>2</sub>), 3.42 [brs, 1H, NH-(CH<sub>3</sub>)], 3.30 [s, 3H, C(O)NCH<sub>3</sub>], 2.59 [s, 3H, H<sub>3</sub>C-(NH)]; Z(trans)-sc rotamer (43 %): 8.28 (brd, 2H,  $J = 8.0$  Hz, Ph-NO<sub>2</sub>), 7.67 (brd, 2H,  $J = 8.0$  Hz, Ph-NO<sub>2</sub>), 5.73 [brs, 1H, NH-(CH<sub>3</sub>)], 3.11 [s, 3H, C(O)NCH<sub>3</sub>], 2.71 [s, 3H, H<sub>3</sub>C-(NH)]; <sup>1</sup>H NMR 400 MHz [20mM, (CD<sub>3</sub>)<sub>2</sub>SO]  $\delta$  ppm E(cis)-ac rotamer (~100 %): 8.21 (d, 2H,  $J = 8.0$  Hz, Ph-NO<sub>2</sub>), 7.67 (d, 2H,  $J = 8.0$  Hz, Ph-NO<sub>2</sub>), 4.97 [q, 1H,  $J = 8.0$  Hz, NH-(CH<sub>3</sub>)], 3.13 [s, 3H, C(O)NCH<sub>3</sub>], 2.39 [brd, 3H,  $J = 4.0$  Hz, H<sub>3</sub>C-N(H)];

<sup>1</sup>H NMR 400 MHz (20mM, CD<sub>3</sub>OD) δ ppm E(cis)-ac rotamer (81 %): 8.24 (brd, 2H, *J* = 8.0 Hz, Ph-NO<sub>2</sub>), 7.70 (brd, 2H, *J* = 8.0 Hz, Ph-NO<sub>2</sub>), 3.26 [s, 3H, C(O)NCH<sub>3</sub>], 2.49 [s, 3H, H<sub>3</sub>C-(NH)]; Z(trans)-sc rotamer (19 %): 8.33 (brd, 2H, *J* = 8.0 Hz, Ph-NO<sub>2</sub>), 7.70 (brd, 2H, *J* = 8.0 Hz, Ph-NO<sub>2</sub>), 4.57 [brs, 1H, NH-(CH<sub>3</sub>)], 3.10 [s, 3H, C(O)NCH<sub>3</sub>], 2.69 [s, 3H, H<sub>3</sub>C-(NH)]; <sup>1</sup>H NMR 400 MHz (20mM, CD<sub>3</sub>CN) δ ppm E(cis)-ac rotamer (83 %): 8.19 (d, 2H, *J* = 8.0 Hz, Ph-NO<sub>2</sub>), 7.64 (brd, 2H, *J* = 8.0 Hz, Ph-NO<sub>2</sub>), 3.96 [brq, 1H, *J* = 8.0 Hz, NH-(CH<sub>3</sub>)], 3.18 [s, 3H, C(O)NCH<sub>3</sub>], 2.46 [brd, 3H, *J* = 4.0 Hz, H<sub>3</sub>C-(NH)]; Z(trans)-sc rotamer (17 %): 8.25 (brd, 2H, *J* = 8.0 Hz, Ph-NO<sub>2</sub>), 7.64 (brd, 2H, *J* = 8.0 Hz, Ph-NO<sub>2</sub>), 5.62 [brs, 1H, NH-(CH<sub>3</sub>)], 3.01 [s, 3H, C(O)NCH<sub>3</sub>], 2.62 [s, 3H, H<sub>3</sub>C-(NH)]; <sup>1</sup>H NMR 400 MHz (20mM, D<sub>2</sub>O) δ ppm E(cis)-ac rotamer (63 %): 8.31 (d, 2H, *J* = 8.0 Hz, Ph-NO<sub>2</sub>), 7.65 (d, 2H, *J* = 8.0 Hz, Ph-NO<sub>2</sub>), 3.27 [s, 3H, C(O)NCH<sub>3</sub>], 2.50 [brd, 3H, *J* = 4.0 Hz, H<sub>3</sub>C-(NH)]; Z(trans)-sc rotamer (37 %): 8.35 (d, 2H, *J* = 8.0 Hz, Ph-NO<sub>2</sub>), 7.70 (d, 2H, *J* = 8.0 Hz, Ph-NO<sub>2</sub>), 3.10 [s, 3H, C(O)NCH<sub>3</sub>], 2.67 [s, 3H, H<sub>3</sub>C-(NH)]; <sup>13</sup>C NMR (100 MHz, CDCl<sub>3</sub>) δ ppm E(cis)-ac rotamer (57 %): 170.6, 148.2, 142.9, 128.7, 123.0, 35.9, 32.7; Minor rotamer (45 %): 167.4, 148.7, 141.6, 128.5, 123.94, 37.7, 36.2; HRMS [M + H]<sup>+</sup> calcd. for, C<sub>9</sub>H<sub>12</sub>N<sub>3</sub>O<sub>3</sub>, m/z: 210.0879; found m/z: 210.0883.

## 2. General Scheme for the synthesis of *N, N', N'*-trimethyl-monoacylhydrazines 1-6:

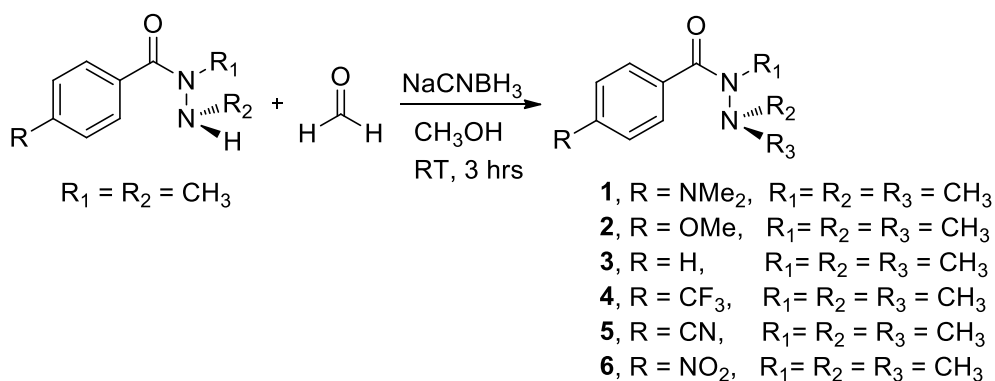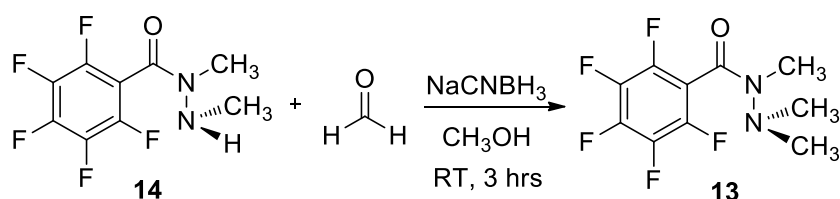

### Procedure: (Reductive Amination)

x mg/  $\mu\text{L}$  of *N, N'*-dimethylbenzohydrazide derivatives (**7-12**) [ $y$  mmol (1 eqv.)] and  $x'$   $\mu\text{L}$  of 37% formaldehyde solution [ $y'$  mmol (3 eqv.)] were dissolved in  $\text{CH}_3\text{OH}$  (5-10 mL) at room temperature and stirred for 1 hr. Then  $x''$  mg of sodiumcyanoborohydride [ $y''$  mmol (3 eqv.)] were added slowly to the above reaction mixture and stirred for another 2 hr. The solvent was evaporated to dryness by using the rotary evaporator. Then the reaction mixture was dissolved in  $\text{CH}_2\text{Cl}_2$  and washed twice with water, then a 10% citric acid solution followed by a saturated sodium bicarbonate ( $\text{NaHCO}_3$ ) solution and finally with brine solution. The organic layer was dried over  $\text{Na}_2\text{SO}_4$  and evaporated under reduced pressure. The final residue was then purified by the Column chromatography using Silica Gel (100-200 Mesh) and gradient of Hexane and ethyl acetate as an eluent.

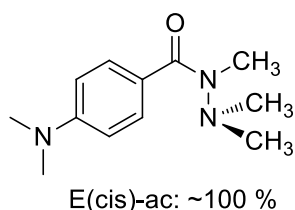

Compound **1**: 4-(dimethylamino)-*N, N', N'*-trimethylbenzohydrazide.

100  $\mu$ L of 4-(dimethylamino)-*N*, *N'*-dimethylbenzohydrazide (**7**) [0.482 mmol (1 eqv.)], 109  $\mu$ L of 37% formaldehyde solution [1.45 mmol (3 eqv.)] and 91 mg of sodiumcyanoborohydride [1.45 mmol (3 eqv.)]. Yield (%): 69 % as a solid.

$^1\text{H}$  NMR 400 MHz (20mM,  $\text{CDCl}_3$ )  $\delta$  ppm [E(cis)-ac:  $\sim$ 100 %]: 7.66 [d, 2H,  $J = 8.0$  Hz, Ph-N(CH<sub>3</sub>)<sub>2</sub>], 6.64 [d, 2H,  $J = 12.0$  Hz, Ph-N(CH<sub>3</sub>)<sub>2</sub>], 3.00 [s, 3H, C(O)N-CH<sub>3</sub>], 2.99 [s, 6H, Ph-N(CH<sub>3</sub>)<sub>2</sub>], 2.52 [s, 6H, N(CH<sub>3</sub>)<sub>2</sub>];  $^1\text{H}$  NMR 400 MHz [20mM, (CD<sub>3</sub>)<sub>2</sub>SO]  $\delta$  ppm [E(cis)-ac:  $\sim$ 100 %]: 7.48 [d, 2H,  $J = 8.0$  Hz, Ph-N(CH<sub>3</sub>)<sub>2</sub>], 6.64 [d, 2H,  $J = 12.0$  Hz, Ph-N(CH<sub>3</sub>)<sub>2</sub>], 2.94 [s, 6H, Ph-N(CH<sub>3</sub>)<sub>2</sub>], 2.87 [s, 3H, C(O)N-CH<sub>3</sub>], 2.43 [s, 6H, N(CH<sub>3</sub>)<sub>2</sub>];  $^1\text{H}$  NMR 400 MHz (20 mM, CD<sub>3</sub>OD)  $\delta$  ppm [E(cis)-ac:  $\sim$ 100 %]: 7.55 [d, 2H,  $J = 8.0$  Hz, Ph-N(CH<sub>3</sub>)<sub>2</sub>], 6.69 [d, 2H,  $J = 8.0$  Hz, Ph-N(CH<sub>3</sub>)<sub>2</sub>], 3.01 [s, 3H, C(O)N-CH<sub>3</sub>], 2.99 [s, 6H, Ph-N(CH<sub>3</sub>)<sub>2</sub>], 2.53 [s, 6H, N(CH<sub>3</sub>)<sub>2</sub>];  $^1\text{H}$  NMR 400 MHz (20 mM, CD<sub>3</sub>CN)  $\delta$  ppm [E(cis)-ac:  $\sim$ 100 %]: 7.51 [d, 2H,  $J = 8.0$  Hz, Ph-N(CH<sub>3</sub>)<sub>2</sub>], 6.67 [d, 2H,  $J = 12.0$  Hz, Ph-N(CH<sub>3</sub>)<sub>2</sub>], 2.96 [s, 6H, Ph-N(CH<sub>3</sub>)<sub>2</sub>], 2.92 [s, 3H, C(O)N-CH<sub>3</sub>], 2.46 [s, 6H, N(CH<sub>3</sub>)<sub>2</sub>];  $^{13}\text{C}$  NMR (100 MHz,  $\text{CDCl}_3$ )  $\delta$  ppm [E(cis)-ac:  $\sim$ 100 %]: 171.8, 151.6, 130.6, 122.8, 110.4, 43.3, 40.3, 23.5; HRMS [M + H]<sup>+</sup> calcd. for, C<sub>12</sub>H<sub>20</sub>N<sub>3</sub>O, m/z: 222.1606; found m/z: 222.1607.

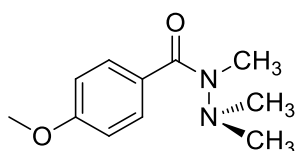

E(cis)-ac:  $\sim$ 100 %

Compound **2**: 4-methoxy-*N*, *N'*, *N'*-trimethylbenzohydrazide.

100  $\mu$ L of 4-methoxy-*N*, *N'*-dimethylbenzohydrazide (**8**) [0.515 mmol (1 eqv.)], 117  $\mu$ L of 37% formaldehyde solution [1.54 mmol (3 eqv.)] and 97 mg of sodiumcyanoborohydride [1.54 mmol (3 eqv.)]. Yield (%): 67 % as a solid.

$^1\text{H}$  NMR 400 MHz (20mM,  $\text{CDCl}_3$ )  $\delta$  ppm [E(cis)-ac:  $\sim$ 100 %]: 7.60 (d, 2H,  $J = 8.0$  Hz, Ph-OCH<sub>3</sub>), 6.86 (d, 2H,  $J = 8.0$  Hz, Ph-OCH<sub>3</sub>), 3.83 (s, 3H, OCH<sub>3</sub>), 3.02 [s, 3H, C(O)N-CH<sub>3</sub>], 2.50

[s, 6H, N(CH<sub>3</sub>)<sub>2</sub>]; <sup>1</sup>H NMR 400 MHz [20mM, (CD<sub>3</sub>)<sub>2</sub>SO] δ ppm [E(cis)-ac: ~100 %]: 7.48 (d, 2H, *J* = 8.0 Hz, Ph-OCH<sub>3</sub>), 6.90 (d, 2H, *J* = 8.0 Hz, Ph-OCH<sub>3</sub>), 3.78 (s, 3H, OCH<sub>3</sub>), 2.90 [s, 3H, C(O)N-CH<sub>3</sub>], 2.42 [s, 6H, N(CH<sub>3</sub>)<sub>2</sub>]; <sup>1</sup>H NMR 400 MHz (20 mM, CD<sub>3</sub>OD) δ ppm [E(cis)-ac: ~100 %]: 7.54 [d, 2H, *J* = 8.0 Hz, Ph-OCH<sub>3</sub>], 6.91 [d, 2H, *J* = 8.0 Hz, Ph-OCH<sub>3</sub>], 3.83 [s, 3H, OCH<sub>3</sub>], 3.02 [s, 3H, C(O)N-CH<sub>3</sub>], 2.51 [s, 6H, N(CH<sub>3</sub>)<sub>2</sub>]; <sup>1</sup>H NMR 400 MHz (20 mM, CD<sub>3</sub>CN) δ ppm [E(cis)-ac: ~100 %]: 7.51 [d, 2H, *J* = 12.0 Hz, Ph- OCH<sub>3</sub>], 6.89 [d, 2H, *J* = 8.0 Hz, Ph-OCH<sub>3</sub>], 3.81 [s, 3H, OCH<sub>3</sub>], 2.94 [s, 3H, C(O)N-CH<sub>3</sub>], 2.45 [s, 6H, N(CH<sub>3</sub>)<sub>2</sub>]; <sup>13</sup>C NMR (100 MHz, CDCl<sub>3</sub>) δ ppm [E(cis)-ac: ~100 %]: 171.7, 160.8, 130.2, 128.4, 112.8, 55.4, 43.2, 23.2; HRMS [M + H]<sup>+</sup> calcd. for, C<sub>11</sub>H<sub>17</sub>N<sub>2</sub>O<sub>2</sub>, m/z: 209.1290; found m/z: 209.1292.

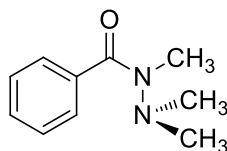

E(cis)-ac: ~100 %

Compound **3**: *N, N', N'*-trimethylbenzohydrazide.

100 μL of *N, N'*-dimethylbenzohydrazide (**9**) [0.609 mmol (1 eqv.)], 138 μL of 37% formaldehyde solution [1.83 mmol (3 eqv.)] and 115 mg of sodiumcyanoborohydride [1.83 mmol (3 eqv.)]. Yield (%): 66 % as a solid.

<sup>1</sup>H NMR 400 MHz (20mM, CDCl<sub>3</sub>) δ ppm [E(cis)-ac: ~100 %]: 7.52-7.50 (m, 2H, Ph), 7.39-7.33 (m, 3H, Ph), 3.04 [s, 3H, C(O)N-CH<sub>3</sub>], 2.48 [s, 6H, N(CH<sub>3</sub>)<sub>2</sub>]; <sup>1</sup>H NMR 400 MHz (20mM, [CD<sub>3</sub>)<sub>2</sub>SO] δ ppm [E(cis)-ac: ~100 %]: 7.43-7.34 (m, 5H, Ph), 2.92 [s, 3H, C(O)N-CH<sub>3</sub>], 2.40 [s, 6H, N(CH<sub>3</sub>)<sub>2</sub>]; <sup>1</sup>H NMR 400 MHz (20 mM, CD<sub>3</sub>OD) δ ppm [E(cis)-ac: ~100 %]: 7.48-7.45 (m, 2H, Ph), 7.40-7.35 (m, 3H, Ph), 3.04 [s, 3H, C(O)N-CH<sub>3</sub>], 2.48 [s, 6H, N(CH<sub>3</sub>)<sub>2</sub>]; <sup>1</sup>H NMR 400 MHz (20 mM, CD<sub>3</sub>CN) δ ppm [E(cis)-ac: ~100 %]: 7.45-7.34 (m, 5H, Ph), 2.96 [s, 3H, C(O)N-CH<sub>3</sub>], 2.43 [s, 6H, N(CH<sub>3</sub>)<sub>2</sub>]; <sup>13</sup>C NMR (100 MHz, CDCl<sub>3</sub>) δ ppm [E(cis)-ac: ~100 %]: 171.6, 136.9, 129.4, 127.6, 127.5, 43.2, 22.9; HRMS [M + H]<sup>+</sup> calcd. for, C<sub>10</sub>H<sub>15</sub>N<sub>2</sub>O, m/z: 179.1184; found m/z: 179.1184.

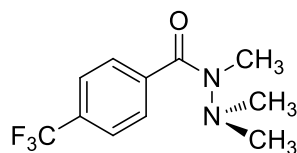

E(cis)-ac: ~100 %

Compound **4**: *N, N', N'*-trimethyl-4-(trifluoromethyl)benzohydrazide.

100  $\mu$ L of *N, N'*-dimethyl-4-(trifluoromethyl)benzohydrazide (**10**) [0.431 mmol (1 eqv.)], 98  $\mu$ L of 37% formaldehyde solution [1.29 mmol (3 eqv.)] and 81 mg of sodiumcyanoborohydride [1.29 mmol (3 eqv.)]. Yield (%): 65 % as a solid.

$^1\text{H}$  NMR 400 MHz (20mM,  $\text{CDCl}_3$ )  $\delta$  ppm [E(cis)-ac: ~100 %]: 7.63-7.57 (m, 4H, Ph- $\text{CF}_3$ ), 3.05 [s, 3H, C(O)N- $\text{CH}_3$ ], 2.47 [s, 6H, N( $\text{CH}_3$ ) $_2$ ];  $^{19}\text{F}$  NMR 376 MHz (20mM,  $\text{CDCl}_3$ )  $\delta$  ppm [E(cis)-ac: ~100 %]: -62.76 (s, 3F, Ph- $\text{CF}_3$ );  $^1\text{H}$  NMR 400 MHz (20mM,  $[\text{CD}_3]_2\text{SO}$ )  $\delta$  ppm [E(cis)-ac: ~100 %]: 7.73 (d, 2H,  $J = 8.0$  Hz, Ph- $\text{CF}_3$ ), 7.61 (d, 2H,  $J = 8.0$  Hz, Ph- $\text{CF}_3$ ), 2.95 [s, 3H, C(O)N- $\text{CH}_3$ ], 2.40 [s, 6H, N( $\text{CH}_3$ ) $_2$ ];  $^{19}\text{F}$  NMR 376 MHz (20mM,  $[\text{CD}_3]_2\text{SO}$ )  $\delta$  ppm [E(cis)-ac: ~100 %]: -61.11 (s, 3F, Ph- $\text{CF}_3$ );  $^1\text{H}$  NMR 400 MHz (20mM,  $\text{CD}_3\text{OD}$ )  $\delta$  ppm [E(cis)-ac: ~100 %]: 7.69 (d, 2H,  $J = 8.0$  Hz, Ph- $\text{CF}_3$ ), 7.62 (d, 2H,  $J = 8.0$  Hz, Ph- $\text{CF}_3$ ), 3.07 [s, 3H, C(O)N- $\text{CH}_3$ ], 2.49 [s, 6H, N( $\text{CH}_3$ ) $_2$ ];  $^{19}\text{F}$  NMR 376 MHz (20mM,  $\text{CD}_3\text{OD}$ )  $\delta$  ppm [E(cis)-ac: ~100 %]: -64.28 (s, 3F, Ph- $\text{CF}_3$ );  $^1\text{H}$  NMR 400 MHz (20mM,  $\text{CD}_3\text{CN}$ )  $\delta$  ppm [E(cis)-ac: ~100 %]: 7.68 (d, 2H,  $J = 8.0$  Hz, Ph- $\text{CF}_3$ ), 7.59 (d, 2H,  $J = 8.0$  Hz, Ph- $\text{CF}_3$ ), 2.98 [s, 3H, C(O)N- $\text{CH}_3$ ], 2.42 [s, 6H, N( $\text{CH}_3$ ) $_2$ ];  $^{19}\text{F}$  NMR 376 MHz (20mM,  $\text{CD}_3\text{CN}$ )  $\delta$  ppm [E(cis)-ac: ~100 %]: -64.28 (s, 3F, Ph- $\text{CF}_3$ );  $^{13}\text{C}$  NMR (100 MHz,  $\text{CDCl}_3$ )  $\delta$  ppm [E(cis)-ac: ~100 %]: 171.2, 140.5, 131.1 (q,  $^2J_{\text{CF}} = 32.0$  Hz), 127.6, 124.7 (q,  $^3J_{\text{CF}} = 3.0$  Hz), 124.11 (q,  $^1J_{\text{CF}} = 270.0$  Hz), 43.2, 22.9; HRMS  $[\text{M} + \text{H}]^+$  calcd. for,  $\text{C}_{11}\text{H}_{14}\text{F}_3\text{N}_2\text{O}$ , m/z: 247.1058; found m/z: 247.1064.

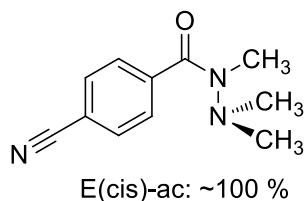

Compound **5**: 4-cyano-*N, N', N'*-trimethylbenzohydrazide.

100 mg of 4-cyano-*N, N'*-dimethylbenzohydrazide (**11**) [0.529 mmol (1 eqv.)], 120  $\mu$ L of 37% formaldehyde solution [1.59 mmol (3 eqv.)] and 100 mg of sodiumcyanoborohydride [1.59 mmol (3 eqv.)]. Yield (%): 65 % as a solid.

$^1\text{H}$  NMR 400 MHz (20mM,  $\text{CDCl}_3$ )  $\delta$  ppm [E(cis)-ac: ~100 %]: 7.65 (d, 2H,  $J = 8.0$  Hz, Ph-CN), 7.56 (d, 2H,  $J = 8.0$  Hz, Ph-CN), 3.05 [s, 3H, C(O)N-CH<sub>3</sub>], 2.46 [s, 6H, N(CH<sub>3</sub>)<sub>2</sub>];  $^1\text{H}$  NMR 400 MHz [20mM,  $(\text{CD}_3)_2\text{SO}$ ]  $\delta$  ppm [E(cis)-ac: ~100 %]: 7.84 (d, 2H,  $J = 8.0$  Hz, Ph-CN), 7.57 (d, 2H,  $J = 8.0$  Hz, Ph-CN), 2.94 [s, 3H, C(O)N-CH<sub>3</sub>], 2.39 [s, 6H, N(CH<sub>3</sub>)<sub>2</sub>];  $^1\text{H}$  NMR 400 MHz (20 mM,  $\text{CD}_3\text{OD}$ )  $\delta$  ppm [E(cis)-ac: ~100 %]: 7.75 (d, 2H,  $J = 8.0$  Hz, Ph-CN), 7.60 (d, 2H,  $J = 8.0$  Hz, Ph-CN), 3.06 [s, 3H, C(O)N-CH<sub>3</sub>], 2.47 [s, 6H, N(CH<sub>3</sub>)<sub>2</sub>];  $^1\text{H}$  NMR 400 MHz (20 mM,  $\text{CD}_3\text{CN}$ )  $\delta$  ppm [E(cis)-ac: ~100 %]: 7.72 (d, 2H,  $J = 8.0$  Hz, Ph-CN), 7.56 (d, 2H,  $J = 12.0$  Hz, Ph-CN), 2.97 [s, 3H, C(O)-NCH<sub>3</sub>], 2.41 [s, 6H, N(CH<sub>3</sub>)<sub>2</sub>];  $^{13}\text{C}$  NMR (100 MHz,  $\text{CDCl}_3$ )  $\delta$  ppm [E(cis)-ac: ~100 %]: 170.7, 141.4, 131.6, 127.8, 118.7, 112.9, 43.2, 23.0; HRMS  $[\text{M} + \text{H}]^+$  calcd. for,  $\text{C}_{11}\text{H}_{14}\text{N}_3\text{O}$ ,  $m/z$ : 204.1137; found  $m/z$ : 204.1139.

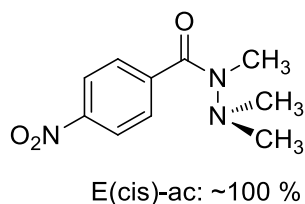

Compound **6**: *N, N', N'*-trimethyl-4-nitrobenzohydrazide.

100 mg of *N, N'*-dimethyl-4-nitrobenzohydrazide (**12**) [0.478 mmol (1 eqv.)], 108  $\mu$ L of 37% formaldehyde solution [1.43 mmol (3 eqv.)] and 90 mg of sodiumcyanoborohydride [1.43 mmol (3 eqv.)]. Yield (%): 62 % as a solid.



$^1\text{H}$  NMR 400 MHz (20mM,  $\text{CDCl}_3$ )  $\delta$  ppm [E(cis)-ac: ~100 %]: 8.22 (d, 2H,  $J = 8.0$  Hz, Ph- $\text{NO}_2$ ), 7.62 (d, 2H,  $J = 8.0$  Hz, Ph- $\text{NO}_2$ ), 3.06 [s, 3H, C(O)N- $\text{CH}_3$ ], 2.47 [s, 6H, N( $\text{CH}_3$ ) $_2$ ];  $^1\text{H}$  NMR 400 MHz [20mM,  $(\text{CD}_3)_2\text{SO}$ ]  $\delta$  ppm [E(cis)-ac: ~100 %]: 8.21 (d, 2H,  $J = 8.0$  Hz, Ph- $\text{NO}_2$ ), 7.66 (d, 2H,  $J = 8.0$  Hz, Ph- $\text{NO}_2$ ), 2.96 [s, 3H, C(O)N- $\text{CH}_3$ ], 2.39 [s, 6H, N( $\text{CH}_3$ ) $_2$ ];  $^1\text{H}$  NMR 400 MHz (20mM,  $\text{CD}_3\text{OD}$ )  $\delta$  ppm [E(cis)-ac: ~100 %]: 8.25 (d, 2H,  $J = 8.0$  Hz, Ph- $\text{NO}_2$ ), 7.67 (d, 2H,  $J = 8.0$  Hz, Ph- $\text{NO}_2$ ), 3.07 [s, 3H, C(O)N- $\text{CH}_3$ ], 2.48 [s, 6H, N( $\text{CH}_3$ ) $_2$ ];  $^1\text{H}$  NMR 400 MHz (20mM,  $\text{CD}_3\text{CN}$ )  $\delta$  ppm [E(cis)-ac: ~100 %]: 8.20 (d, 2H,  $J = 8.0$  Hz, Ph- $\text{NO}_2$ ), 7.62 (d, 2H,  $J = 8.0$  Hz, Ph- $\text{NO}_2$ ), 2.99 [s, 3H, C(O)N- $\text{CH}_3$ ], 2.42 [s, 6H, N( $\text{CH}_3$ ) $_2$ ];  $^{13}\text{C}$  NMR (100 MHz,  $\text{CDCl}_3$ )  $\delta$  ppm [E(cis)-ac: ~100 %]: 170.5, 148.1, 143.4, 128.0, 123.1, 43.2, 23.0; HRMS  $[\text{M} + \text{H}]^+$  calcd. for,  $\text{C}_{10}\text{H}_{14}\text{N}_3\text{O}_3$ , m/z: 224.1035; found m/z: 224.1034.

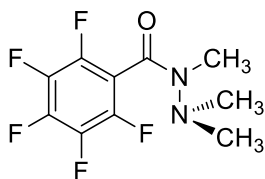

E(cis)-ac: ~100 %

Compound **13**: 2,3,4,5,6-pentafluoro-*N, N', N'*-trimethylbenzohydrazide.

100 mg of 2,3,4,5,6-pentafluoro-*N, N'*-dimethylbenzohydrazide (**14**) [0.393 mmol (1 eqv.)], 89  $\mu\text{L}$  of 37% formaldehyde solution [1.18 mmol (3 eqv.)] and 74 mg of sodiumcyanoborohydride [1.18 mmol (3 eqv.)]. Yield (%): 50 % as a white solid.

$^1\text{H}$  NMR 400 MHz (20mM,  $\text{CDCl}_3$ )  $\delta$  ppm [E(cis)-ac: ~100 %]: 3.08 [s, 3H, C(O)N- $\text{CH}_3$ ], 2.47 [s, 6H, N( $\text{CH}_3$ ) $_2$ ];  $^{19}\text{F}$  NMR 376 MHz (20mM,  $\text{CDCl}_3$ )  $\delta$  ppm [E(cis)-ac: ~100 %]: -142.44 to -142.54 (m, 2F, Ph-F5), -154.77 (t, 1F,  $J = 19$  Hz, Ph-F5), -161.66 to -161.81 (m, 2F, Ph-F5);  $^1\text{H}$  NMR 400 MHz [20mM,  $(\text{CD}_3)_2\text{SO}$ ]  $\delta$  ppm [E(cis)-ac: ~100 %]: 3.02 [s, 3H, C(O)N- $\text{CH}_3$ ], 2.42 [s, 6H, N( $\text{CH}_3$ ) $_2$ ];  $^{19}\text{F}$  NMR 376 MHz [20mM,  $(\text{CD}_3)_2\text{SO}$ ]  $\delta$  ppm [E(cis)-ac: ~100 %]: -143.65 to -143.74 (m, 2F, Ph-F5), -154.58 (t, 1F,  $J = 23$  Hz, Ph-F5), -161.59 to -161.75 (m, 2F, Ph-F5);  $^1\text{H}$  NMR 400 MHz (20mM,  $\text{CD}_3\text{OD}$ )  $\delta$  ppm [E(cis)-ac: ~100 %]: 3.10 [s, 3H, C(O)N-

CH<sub>3</sub>], 2.50 [s, 6H, N(CH<sub>3</sub>)<sub>2</sub>]; <sup>19</sup>F NMR 376 MHz [20mM, (CD<sub>3</sub>)<sub>2</sub>SO] δ ppm [E(cis)-ac: ~100 %]: -145.13 to -145.22 (m, 2F, Ph-F5), -157.61 (t, 1F, *J* = 19 Hz, Ph-F5), -164.57 to -164.69 (m, 2F, Ph-F5); <sup>1</sup>H NMR 400 MHz (20mM, CD<sub>3</sub>CN) δ ppm [E(cis)-ac: ~100 %]: 3.03 [s, 3H, C(O)N-CH<sub>3</sub>], 2.44 [s, 6H, N(CH<sub>3</sub>)<sub>2</sub>]; <sup>19</sup>F NMR 376 MHz [20mM, (CD<sub>3</sub>)<sub>2</sub>SO] δ ppm [E(cis)-ac: ~100 %]: -144.81 to -144.90 (m, 2F, Ph-F5), -157.60 (t, 1F, *J* = 19 Hz, Ph-F5), -163.83 to -163.97 (m, 2F, Ph-F5); <sup>13</sup>C NMR (100 MHz, CDCl<sub>3</sub>) δ ppm [E(cis)-ac: ~100 %]: 160.5, 144.3-144.0 (m, Ph-F5), 142.5-142.3 (m, Ph-F5), 141.8-141.5 (m, Ph-F5), 140.0-139.7 (m, Ph-F5), 138.9-138.6 (m, Ph-F5), 136.6-136.1 (m, Ph-F5), 141.2-113.5 (m, Ph-F5), 43.6, 22.9; HRMS [M + H]<sup>+</sup> calcd. for, C<sub>10</sub>H<sub>10</sub>F<sub>5</sub>N<sub>2</sub>O, m/z: 269.0713; found m/z: 269.0702.

### 3. General Scheme for the synthesis of *N,N'*-dimethyl-monoacylhydrazines 14-18:

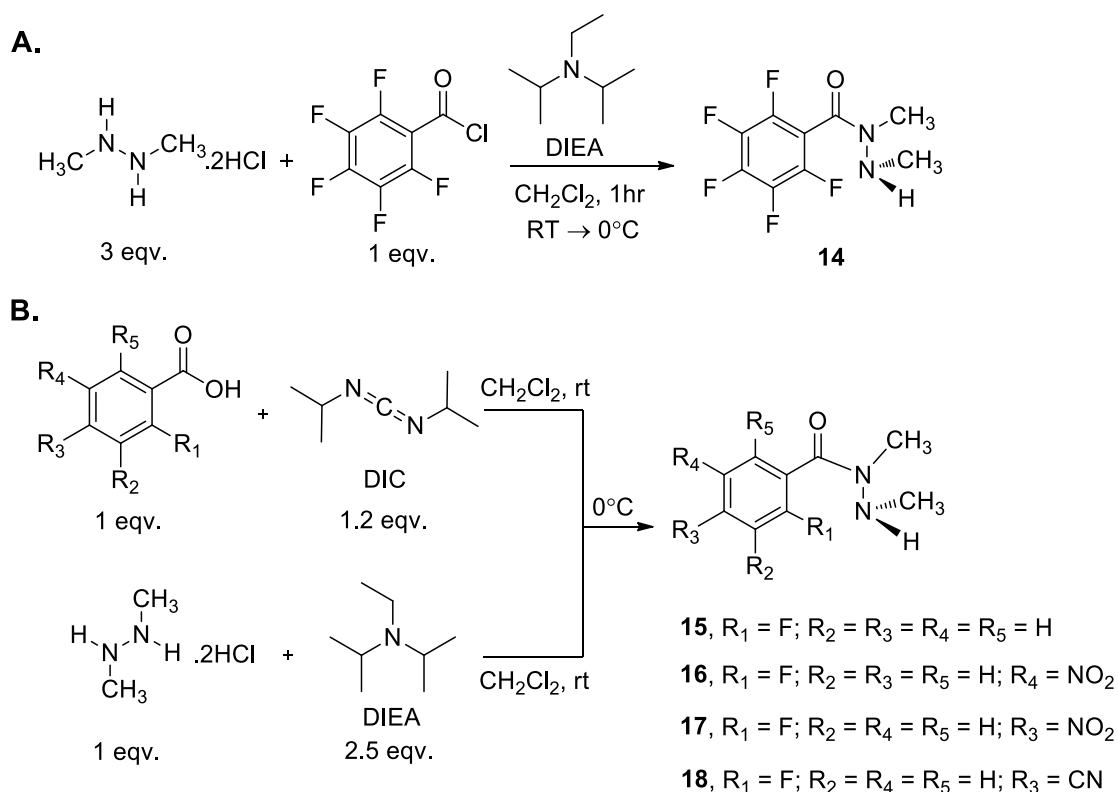

#### Procedure:

**A.** x mg of 1,2-Dimethylhydrazine-dihydrochloride [y mmol (3 eqv.)] were neutralized by using x' μL of N, N-diisopropylethylamine [DIEA-y' mmol (7 eqv.)] in CH<sub>2</sub>Cl<sub>2</sub> (15 mL) at room temperature and stirred for 15 minutes. The reaction mixture was allowed to cool to

0° C and stirred for another 5 minutes. Then x'' mg/ μL of Acyl chloride [y'' mmol (1 eqv.)] in CH<sub>2</sub>Cl<sub>2</sub> (2 mL) were added drop-wise manner to a reaction mixture over 10 minutes and stirred for another 30 minutes. The solvent was evaporated to dryness by using the rotary evaporator. Then the reaction mixture was dissolved in CH<sub>2</sub>Cl<sub>2</sub> and washed twice with water, then a 10% citric acid solution followed by a saturated sodium bicarbonate (NaHCO<sub>3</sub>) solution and finally with brine solution. The organic layer was dried over Na<sub>2</sub>SO<sub>4</sub> and evaporated under reduced pressure and the temperature of the rota-vapor need to be maintained less than 40 °C. The final residue was then purified by the Column chromatography using Silica Gel (100-200 Mesh) and gradient of Hexane and ethyl acetate as an eluent.

**B.** In two-neck Rb flask, x mg of substituted benzoic acid [y mmol (1.2 eqv.)] were activated by using x' μL of *N,N'*-diisopropylcarbodiimide (DIC) coupling reagent [y' mmol (1.2 eqv.)] in CH<sub>2</sub>Cl<sub>2</sub> (10 mL) at room temperature and stirred for 1 hr (reaction mixture 1). In another two-neck Rb flask, x'' mg of 1,2-Dimethylhydrazine-dihydrochloride [y'' mmol (1 eqv.)] were neutralized by using x''' μL of *N,N*-diisopropylethylamine [DIEA-y''' mmol (2.5 eqv.)] in CH<sub>2</sub>Cl<sub>2</sub> (10 mL) at room temperature and stirred for 1 hr (reaction mixture 2). Then both the reaction mixture was allowed to cool to 0° C and stirred for another 5 minutes. Then the reaction mixture 1 was slowly added into the rb flask of the reaction mixture 2 and stirred for another 1hr at 0° C. DIC-Urea were filtered off from the final reaction mixture. Then the solvent was evaporated to dryness by using the rotary evaporator. Then the reaction mixture was dissolved in CH<sub>2</sub>Cl<sub>2</sub> and washed twice with water, then a 10% citric acid solution followed by a saturated sodium bicarbonate (NaHCO<sub>3</sub>) solution and finally with brine solution. The organic layer was dried over Na<sub>2</sub>SO<sub>4</sub> and evaporated under reduced pressure and the temperature of the rota-vapour need to be maintained less than 40 °C. The final

residue was then purified by the Column chromatography using Silica Gel (100-200 Mesh) and gradient of Hexane and ethyl acetate as an eluent.

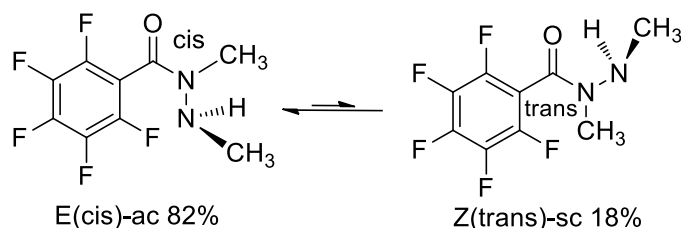

Compound **14**: 2,3,4,5,6-pentafluoro-*N, N'*-dimethylbenzohydrazide.

**A.**  $x = 173$  mg of 1,2-Dimethylhydrazine-dihydrochloride [ $y = 1.30$  mmol (3 eqv.)],  $x' = 519$   $\mu\text{L}$  of *N, N*-diisopropylethylamine [DIEA ( $y'$ ) = 3.05 mmol (7 eqv.)] and  $x'' = 63$   $\mu\text{L}$  of 2,3,4,5,6-pentafluorobenzoyl chloride [ $y'' = 0.434$  mmol (1 eqv.)]. Yield (%): 85 % as a white solid.

$^1\text{H NMR}$  400 MHz (20mM,  $\text{CDCl}_3$ )  $\delta$  ppm E(cis)-ac rotamer (82 %): 3.54 [brs, 1H, HN-( $\text{CH}_3$ )], 3.30 [s, 3H, C(O)N $\text{CH}_3$ ], 2.58 [brs, 3H,  $\text{H}_3\text{C}$ -(NH)]; Z(trans)-sc rotamer (18 %): 3.08 [s, 3H, C(O)N $\text{CH}_3$ ], 2.70 [s, 3H,  $\text{H}_3\text{C}$ -(NH)];  $^{19}\text{F NMR}$  376 MHz (20mM,  $\text{CDCl}_3$ )  $\delta$  ppm [E(cis)-ac: 82 %]: -141.72 [brdd, 2F,  $J = 11.0$  Hz, ortho-F (F5-Ph)], -154.34 [t, 1F,  $J = 23.0$  Hz, para-F (F5-Ph)], -161.74 to -161.88 [m, 2F, meta-F (F5-Ph)]; Z(trans)-sc rotamer (18 %): -140.65 [brdd, 2F,  $J = 11.0$  Hz, ortho-F (F5-Ph)], -150.97 [t, 1F,  $J = 23.0$  Hz, para-F (F5-Ph)], -159.48 to -159.63 [m, 2F, meta-F (F5-Ph)];  $^1\text{H NMR}$  400 MHz (20mM,  $[\text{CD}_3]_2\text{SO}$ )  $\delta$  ppm E(cis)-ac rotamer (~100%): 5.32 [q, 1H,  $J = 8.0$  Hz, HN-( $\text{CH}_3$ )], 3.16 [s, 3H, C(O)N $\text{CH}_3$ ], 2.38 [d, 3H,  $J = 4.0$  Hz,  $\text{H}_3\text{C}$ -(NH)];  $^{19}\text{F NMR}$  376 MHz (20mM,  $[\text{CD}_3]_2\text{SO}$ )  $\delta$  ppm [E(cis)-ac: ~100 %]: -143.03 [brdd, 2F,  $J = 15.0$  Hz, ortho-F (F5-Ph)], -154.77 [t, 1F,  $J = 23.0$  Hz, para-F (F5-Ph)], -161.98 to -162.13 [m, 2F, meta-F (F5-Ph)];  $^1\text{H NMR}$  400 MHz (20mM,  $\text{CD}_3\text{OD}$ )  $\delta$  ppm E(cis)-ac rotamer (94 %): 3.26 [s, 3H, C(O)N $\text{CH}_3$ ], 2.49 [d, 3H,  $J = 4.0$  Hz,  $\text{H}_3\text{C}$ -(NH)]; Z(trans)-sc rotamer (6 %): 3.10 [s, 3H, C(O)N $\text{CH}_3$ ], 2.67 [s, 3H,  $\text{H}_3\text{C}$ -(NH)];  $^{19}\text{F NMR}$  376 MHz (20mM,  $\text{CDCl}_3$ )  $\delta$  ppm [E(cis)-ac: 94 %]: -144.52 to -144.60 [m, 2F, ortho-F (F5-Ph)], -157.65 [t, 1F,

$J = 19.0$  Hz, para-F (F5-Ph)], -164.91 to -165.04 [m, 2F, meta-F (F5-Ph)]; Z(trans)-sc rotamer (6 %): -144.22 to -144.25 [m, 2F, ortho-F (F5-Ph)], -154.68 [t, 1F,  $J = 19.0$  Hz, para-F (F5-Ph)], -162.93 to -163.05 [m, 2F, meta-F (F5-Ph)];  $^1\text{H}$  NMR 400 MHz (20mM,  $\text{CD}_3\text{CN}$ )  $\delta$  ppm E(cis)-ac rotamer (92 %): 4.21 [brq, 1H,  $J = 4.0$  Hz, HN-( $\text{CH}_3$ )], 3.20 [s, 3H, C(O)N $\text{CH}_3$ ], 2.46 [d, 3H,  $J = 4.0$  Hz,  $\text{H}_3\text{C}$ -(NH)]; Z(trans)-sc rotamer (8 %): 3.02 [s, 3H, C(O)N $\text{CH}_3$ ], 2.61 [s, 3H,  $\text{H}_3\text{C}$ -(NH)];  $^{19}\text{F}$  NMR 376 MHz (20mM,  $\text{CDCl}_3$ )  $\delta$  ppm [E(cis)-ac: 92 %]: -144.20 to -144.28 [m, 2F, ortho-F (F5-Ph)], -157.27 [t, 1F,  $J = 19.0$  Hz, para-F (F5-Ph)], -164.03 to -164.16 [m, 2F, meta-F (F5-Ph)]; Z(trans)-sc rotamer (8 %): -143.83 to -143.91 [m, 2F, ortho-F (F5-Ph)], -154.96 [t, 1F,  $J = 19.0$  Hz, para-F (F5-Ph)], -162.30 to -162.44 [m, 2F, meta-F (F5-Ph)];  $^1\text{H}$  NMR 400 MHz (20mM,  $\text{D}_2\text{O}$ )  $\delta$  ppm E(cis)-ac rotamer (76 %): 3.29 [s, 3H, C(O)N $\text{CH}_3$ ], 2.51 [s, 3H,  $\text{H}_3\text{C}$ -(NH)]; Z(trans)-sc rotamer (24 %): 3.14 [s, 3H, C(O)N $\text{CH}_3$ ], 2.66 [s, 3H,  $\text{H}_3\text{C}$ -(NH)];  $^{19}\text{F}$  NMR 376 MHz (20mM,  $\text{D}_2\text{O}$ )  $\delta$  ppm [E(cis)-ac: 76 %]: -142.67 to -142.78 [m, 2F, ortho-F (F5-Ph)], -153.23 [t, 1F,  $J = 23.0$  Hz, para-F (F5-Ph)], -161.31 to -161.46 [m, 2F, meta-F (F5-Ph)]; Z(trans)-sc rotamer (24 %): -142.04 [m, 2F, ortho-F (F5-Ph)], -150.98 [t, 1F,  $J = 23.0$  Hz, para-F (F5-Ph)], -160.25 to -160.39 [m, 2F, meta-F (F5-Ph)];  $^{13}\text{C}$  NMR (100 MHz,  $\text{CDCl}_3$ )  $\delta$  ppm [E(cis)-ac: 82 %]: 161.0, 144.3-144.1 (m, Ph-F5), 142.8-142.4 (m, Ph-F5), 141.9-141.6 (m, Ph-F5), 140.3-139.9 (m, Ph-F5), 138.9-138.5 (m, Ph-F5), 136.4-136.0 (m, Ph-F5), 113.3-112.8 (m, Ph-F5), 35.89, 31.97; [Z(trans)-sc: 18 %]: 156.9, 144.3-144.1 (m, Ph-F5), 142.8-142.4 (m, Ph-F5), 141.9-141.6 (m, Ph-F5), 140.3-139.9 (m, Ph-F5), 138.9-138.5 (m, Ph-F5), 136.4-136.0 (m, Ph-F5), 113.3-112.8 (m, Ph-F5), 36.3, 36.1; HRMS  $[\text{M} + \text{H}]^+$  calcd. for,  $\text{C}_9\text{H}_8\text{F}_5\text{N}_2\text{O}$ ,  $m/z$ : 255.0557; found  $m/z$ : 255.0565.

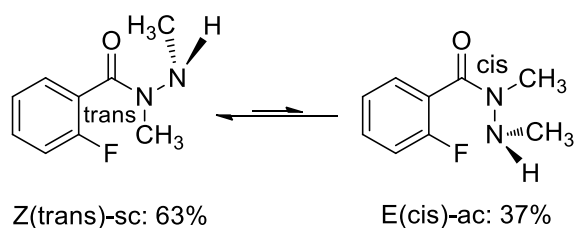

Compound **15**: 2-fluoro-*N,N'*-dimethylbenzohydrazide.

**B.**  $x = 158$  mg of 2-fluorobenzoic acid [ $y = 1.13$  mmol (1.2 eqv.)],  $x' = 210$   $\mu$ L of *N,N'*-diisopropylcarbodiimide (DIC) coupling reagent [ $y' = 1.35$  mmol (1.2 eqv.)],  $x'' = 150$  mg of 1,2-Dimethylhydrazine-dihydrochloride [ $y'' = 1.13$  mmol (1 eqv.)] and  $x''' = 482$   $\mu$ L of *N,N*-diisopropylethylamine [DIEA- $y''' = 2.82$  mmol (2.5 eqv.)]. Yield (%): 89 % as a white semisolid.

$^1\text{H}$  NMR 400 MHz (20mM,  $\text{CDCl}_3$ )  $\delta$  ppm Z(trans)-sc rotamer (63 %): 7.45-7.32 [m, 2H, Ph(ortho-F)], 7.24-7.02 [m, 2H, Ph(ortho-F)], 3.07 [brd,  $J = 4.0$  Hz, 3H, C(O)N-CH<sub>3</sub>], 2.70 [s, 3H, H<sub>3</sub>C-(NH)]; E(cis)-ac rotamer (37 %): 7.45-7.32 [m, 2H, Ph(ortho-F)], 7.24-7.02 [m, 2H, Ph(ortho-F)], 3.28 [s, 3H, C(O)N-CH<sub>3</sub>], 2.54 [s, 3H, H<sub>3</sub>C-(NH)];  $^{19}\text{F}$  NMR 376 MHz (20mM,  $\text{CDCl}_3$ )  $\delta$  ppm Z(trans)-sc rotamer (63 %): -114.91 to -114.97 (m, 1F,  $J_{\text{FC}}$ , meta-NO<sub>2</sub>-Ph-F); [E(cis)-ac: 37 %]: -113.74 to -113.79 (m, 1F,  $J_{\text{FC}}$ , meta-NO<sub>2</sub>-Ph-F);  $^1\text{H}$  NMR 400 MHz (20mM,  $[\text{CD}_3]_2\text{SO}$ )  $\delta$  ppm E(cis)-ac rotamer (86 %): 7.40-7.35 [m, 1H, Ph(ortho-F)], 7.31-7.27 [m, 1H, Ph(ortho-F)], 7.20-7.14 [m, 2H, Ph(ortho-F)], 4.93 [q, 1H,  $J = 4.0$  Hz, (CH<sub>3</sub>)N-H] 3.11 [s, 3H, C(O)N-CH<sub>3</sub>], 2.33 [d, 3H,  $J = 8.0$  Hz, H<sub>3</sub>C-(NH)]; Z(trans)-sc rotamer (14 %): 7.89-7.84 [m, 1H, Ph(ortho-F)], 7.67-7.61 [m, 1H, Ph(ortho-F)], 7.54-7.49 [m, 1H, Ph(ortho-F)], 7.31-7.27 [m, 1H, Ph(ortho-F)], 5.87 [brs, 1H, (CH<sub>3</sub>)N-H] 2.92 [s, 3H, C(O)N-CH<sub>3</sub>], 2.54 [s, 3H, H<sub>3</sub>C-(NH)];  $^{19}\text{F}$  NMR 376 MHz [20mM,  $(\text{CD}_3)_2\text{SO}$ ]  $\delta$  ppm [E(cis)-ac: 86 %]: -115.28 to -115.34 (m, 1F,  $J_{\text{FC}}$ , meta-NO<sub>2</sub>-Ph-F); [Z(trans)-sc: 14 %]: -116.60 to -116.66 (m, 1F,  $J_{\text{FC}}$ , meta-NO<sub>2</sub>-Ph-F);  $^{13}\text{C}$  NMR (100 MHz,  $\text{CDCl}_3$ )  $\delta$  ppm [Z(trans)-sc: 63 %]: 164.7, 158.4 (d,  $^1J_{\text{FC}}$ ,  $J = 247$  Hz), 134.6 (d,  $^3J_{\text{FC}}$ ,  $J = 8.0$  Hz), 131.8 (d,  $^2J_{\text{FC}}$ ,  $J = 8.0$  Hz), 129.2 (d,  $^4J_{\text{FC}}$ ,  $J = 3.0$  Hz), 124.7 (d,  $^3J_{\text{FC}}$ ,  $J = 3.0$  Hz), 116.0 (d,  $^2J_{\text{FC}}$ ,  $J = 21.0$  Hz), 36.5 [d,  $J = 3.0$  Hz, C(O)N-CH<sub>3</sub>···F-Ph] 36.1; [E(cis)-ac: 37 %]: 168.8, 158.5 (d,  $^1J_{\text{FC}}$ ,  $J = 246$  Hz), 132.6 (brd,  $^3J_{\text{FC}}$ ), 130.6 (d,  $^2J_{\text{FC}}$ ,  $J = 8.0$  Hz), 128.6 (d,  $^3J_{\text{FC}}$ ,  $J = 4.0$  Hz), 124.0 (d,  $^4J_{\text{FC}}$ ,  $J = 3.0$  Hz), 115.2 (d,  $^2J_{\text{FC}}$ ,  $J = 22.0$  Hz), 35.7 [brd,  $J = 4.0$  Hz, (H)N-CH<sub>3</sub>···F-Ph], 32.3; HRMS  $[\text{M} + \text{H}]^+$  calcd. for, C<sub>9</sub>H<sub>12</sub>FN<sub>2</sub>O,  $m/z$ : 183.0934; found  $m/z$ : 183.0929.

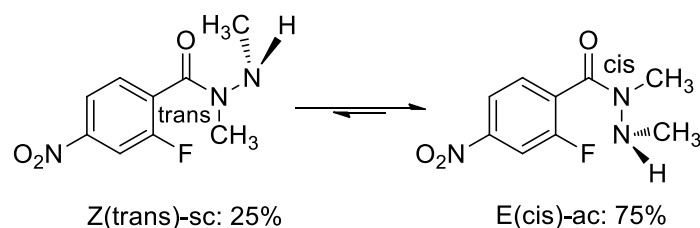

Compound **17**: 2-fluoro-*N,N'*-dimethyl-4-nitrobenzohydrazide.

**B.**  $x = 250$  mg of 2-fluoro-4-nitrobenzoic acid [ $y = 1.35$  mmol (1.2 eqv.)],  $x' = 210$   $\mu\text{L}$  of *N,N'*-diisopropylcarbodiimide (DIC) coupling reagent [ $y' = 1.35$  mmol (1.2 eqv.)],  $x'' = 150$  mg of 1,2-Dimethylhydrazine-dihydrochloride [ $y'' = 1.13$  mmol (1 eqv.)] and  $x''' = 482$   $\mu\text{L}$  of *N,N'*-diisopropylethylamine [DIEA- $y''' = 2.82$  mmol (2.5 eqv.)]. Yield (%): 82 % as an off-white semisolid.

$^1\text{H}$  NMR 400 MHz (20mM,  $\text{CDCl}_3$ )  $\delta$  ppm E(cis)-ac rotamer (75 %): 8.06 (dd, 1H,  $J = 8.0$  Hz, meta- $\text{NO}_2$ -Ph-F), 7.92 (dd, 1H,  $J = 8.0$  Hz, meta- $\text{NO}_2$ -Ph-F), 7.53 (dd, 1H,  $J = 8.0$  Hz, meta- $\text{NO}_2$ -Ph-F), 3.52 [brq,  $J = 8.0$  Hz, 1H,  $(\text{CH}_3)\text{N-H}$ ] 3.29 [s, 3H,  $\text{C(O)N-CH}_3$ ], 2.55 [d, 3H,  $J = 4.0$  Hz, Ph-F $\cdots\text{H}_3\text{C-(NH)}$ ]; Z(trans)-sc rotamer (25 %): 8.12 (dd, 1H,  $J = 8.0$  Hz, meta- $\text{NO}_2$ -Ph-F), 8.02 (dd, 1H,  $J = 8.0$  Hz, meta- $\text{NO}_2$ -Ph-F), 7.63 (dd, 1H,  $J = 8.0$  Hz, meta- $\text{NO}_2$ -Ph-F), 3.06 [d, 3H,  $\text{C(O)N-CH}_3\cdots\text{F-Ph}$ ], 2.71 [s, 3H,  $(\text{H}_3\text{C})\text{N-H}$ ];  $^{19}\text{F}$  NMR 376 MHz (20mM,  $\text{CDCl}_3$ )  $\delta$  ppm [E(cis)-ac: 75 %]: -109.48 (dd, 1F,  $J = 8.0$  Hz, meta- $\text{NO}_2$ -Ph-F); Z(trans)-sc rotamer (25 %): -110.48 (t, 1F,  $J = 8.0$  Hz, meta- $\text{NO}_2$ -Ph-F);  $^1\text{H}$  NMR 400 MHz [20mM,  $(\text{CD}_3)_2\text{SO}$ ]  $\delta$  ppm E(cis)-ac rotamer (~100 %): 8.13-8.07 (m, 2H, meta- $\text{NO}_2$ -Ph-F), 7.64-7.61 (m, 1H, meta- $\text{NO}_2$ -Ph-F), 5.11 [q, 1H,  $J = 4.0$  Hz,  $(\text{CH}_3)\text{N-H}$ ], 3.14 [s, 3H,  $\text{C(O)-NCH}_3$ ], 2.34 [d,  $J = 8.0$  Hz, 3H,  $(\text{H})\text{N-CH}_3$ ];  $^{19}\text{F}$  NMR 376 MHz (20mM,  $[\text{CD}_3]_2\text{SO}$ )  $\delta$  ppm [E(cis)-ac: ~100 %]: - 111.46 (dd,  $J = 8.0$  Hz, 1F, meta- $\text{NO}_2$ -Ph-F);  $^{13}\text{C}$  NMR (100 MHz,  $\text{CDCl}_3$ )  $\delta$  ppm [E(cis)-ac: 75 %]: 166.7, 158.2 (d,  $^1\text{J}_{\text{FC}}$ ,  $J = 250$  Hz), 132.8 (d,  $^2\text{J}_{\text{FC}}$ ,  $J = 18.0$  Hz), 129.2 (d,  $^3\text{J}_{\text{FC}}$ ,  $J = 4.0$  Hz), 119.4 (d,  $^4\text{J}_{\text{FC}}$ ,  $J = 4.0$  Hz), 111.2 (d,  $^2\text{J}_{\text{FC}}$ ,  $J = 28.0$  Hz), 35.6 [d,  $J = 1.0$  Hz,  $(\text{H})\text{N-CH}_3\cdots\text{F-Ph}$ ], 32.0; [Z(trans)-sc: 25 %]: 162.6, 158.1 (d,  $^1\text{J}_{\text{FC}}$ ,  $J = 250$  Hz), 148.8 (d,  $^2\text{J}_{\text{FC}}$ ,  $J = 8.0$  Hz), 130.3 (d,

$^3J_{FC}$ ,  $J = 4.0$  Hz), 120.0 (d,  $^4J_{FC}$ ,  $J = 3.0$  Hz), 112.2 (d,  $^2J_{FC}$ ,  $J = 27.0$  Hz), 36.6 [d,  $J = 3.0$  Hz, C(O)N-CH<sub>3</sub>...F-Ph] 36.1; HRMS [M + H]<sup>+</sup> calcd. for, C<sub>9</sub>H<sub>10</sub>FN<sub>3</sub>O<sub>3</sub>, m/z: 228.0784; found m/z: 228.0795.

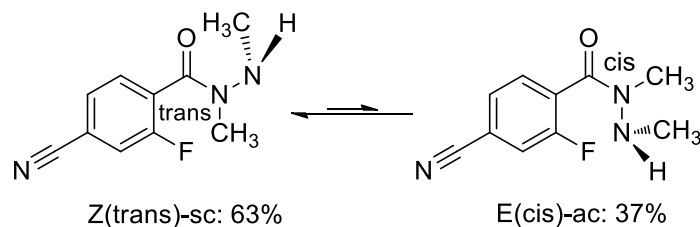

Compound **18**: 2-fluoro-*N,N'*-dimethyl-4-nitrobenzohydrazide.

**B.** x = 223 mg of 4-cyano-2-fluorobenzoic acid [ $y = 1.35$  mmol (1.2 eqv.)], x' = 210  $\mu$ L of *N,N'*-diisopropylcarbodiimide (DIC) coupling reagent [ $y' = 1.35$  mmol (1.2 eqv.)], x'' = 150 mg of 1,2-Dimethylhydrazine-dihydrochloride [ $y'' = 1.13$  mmol (1 eqv.)] and x''' = 482  $\mu$ L of *N,N'*-diisopropylethylamine [DIEA- $y''' = 2.82$  mmol (2.5 eqv.)]. Yield (%): 83 % as an off-white semisolid.

$^1\text{H}$  NMR 400 MHz (20mM, CDCl<sub>3</sub>)  $\delta$  ppm E(cis)-ac rotamer (71 %): 7.55-7.54 (m, 1H, meta-CN-Ph-F), 7.47-7.43 (m, 1H, meta-CN-Ph-F), 7.35-7.33 (d, 1H,  $J = 8.0$  Hz, meta-CN-Ph-F), 3.51 [brq,  $J = 4.0$  Hz, 1H, (CH<sub>3</sub>)N-H] 3.28 [s, 3H, C(O)N-CH<sub>3</sub>], 2.55 [d, 3H,  $J = 4.0$  Hz, Ph-F...H<sub>3</sub>C-(NH)]; Z(trans)-sc rotamer (29 %): 7.47-7.43 (m, 3H, meta-CN-Ph-F), 3.05 [bd, 3H, C(O)N-CH<sub>3</sub>...F-Ph], 2.70 [s, 3H, (H<sub>3</sub>C)N-H];  $^{19}\text{F}$  NMR 376 MHz (20mM, CDCl<sub>3</sub>)  $\delta$  ppm [E(cis)-ac: 71 %]: -110.51 to -110.54 (m, 1F, meta-NO<sub>2</sub>-Ph-F); Z(trans)-sc rotamer (29 %): -111.63 to -111.65 (m, 1F, meta-NO<sub>2</sub>-Ph-F);  $^1\text{H}$  NMR 400 MHz [20mM, (CD<sub>3</sub>)<sub>2</sub>SO]  $\delta$  ppm E(cis)-ac rotamer (~100 %): 7.85 (dd, 1H,  $J = 8.0$  Hz, meta-CN-Ph-F), 7.70 (dd, 1H,  $J = 8.0$  Hz, meta-CN-Ph-F), 7.53 (t, 1H,  $J = 8.0$  Hz, meta-CN-Ph-F), 5.06 [q, 1H,  $J = 4.0$  Hz, (CH<sub>3</sub>)N-H], 3.12 [s, 3H, C(O)-NCH<sub>3</sub>], 2.33 [d,  $J = 4.0$  Hz, 3H, (H)N-CH<sub>3</sub>];  $^{19}\text{F}$  NMR 376 MHz (20mM, [CD<sub>3</sub>)<sub>2</sub>SO]  $\delta$  ppm [E(cis)-ac: ~100 %]: -113.26 (dd,  $J = 8.0$  Hz, 1F, meta-CN-Ph-F);  $^{13}\text{C}$  NMR



(100 MHz, CDCl<sub>3</sub>)  $\delta$  ppm [E(cis)-ac: 71 %]: 166.9, 158.0 (d, <sup>1</sup>J<sub>FC</sub>, *J* = 249.0 Hz), 131.3 (d, <sup>2</sup>J<sub>FC</sub>, *J* = 18.0 Hz), 129.6 (d, <sup>3</sup>J<sub>FC</sub>, *J* = 4.0 Hz), 128.2 (d, <sup>4</sup>J<sub>FC</sub>, *J* = 4.0 Hz), 119.0 (d, <sup>2</sup>J<sub>FC</sub>, *J* = 25.0 Hz), 117.5 (d, <sup>4</sup>J<sub>FC</sub>, *J* = 3.0 Hz), 113.9 (d, <sup>3</sup>J<sub>FC</sub>, *J* = 9.0 Hz), 35.6 [d, *J* = 1.0 Hz, (H)N-CH<sub>3</sub>···F-Ph], 32.0; [Z(trans)-sc: 29 %]: 162.7, 158.2 (d, <sup>1</sup>J<sub>FC</sub>, *J* = 197.0 Hz), 128.8 (d, <sup>2</sup>J<sub>FC</sub>, *J* = 18.0 Hz), 130.5 (d, <sup>3</sup>J<sub>FC</sub>, *J* = 5.0 Hz), 128.8 (d, <sup>4</sup>J<sub>FC</sub>, *J* = 4.0 Hz), 120.0 (d, <sup>2</sup>J<sub>FC</sub>, *J* = 25.0 Hz), 116.9 (d, <sup>4</sup>J<sub>FC</sub>, *J* = 3.0 Hz), 115.4 (d, <sup>3</sup>J<sub>FC</sub>, *J* = 9.0 Hz), 36.5 [d, *J* = 3.0 Hz, C(O)N-CH<sub>3</sub>···F-Ph], 36.8; HRMS [M + H]<sup>+</sup> calcd. for, C<sub>10</sub>H<sub>11</sub>FN<sub>3</sub>O, m/z: 208.0886; found m/z: 208.0897.

### Cyclic compounds:

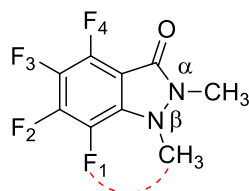

Compound **14C**: 4, 5, 6, 7-tetrafluoro-1, 2-dimethyl-1*H*-indazol-3(2*H*)-one.

Yield (%): 95 % as a white solid.

<sup>1</sup>H NMR 400 MHz (20mM, CDCl<sub>3</sub>)  $\delta$  ppm (~100 %): 3.40 [s, 3H, C(O)-N <sub>$\alpha$</sub> -CH<sub>3</sub>], 3.34 [s, 3H, N <sub>$\beta$</sub> -CH<sub>3</sub>]; <sup>19</sup>F NMR 376 MHz (20mM, CDCl<sub>3</sub>)  $\delta$  ppm (~100 %): -143.27 to -143.39 (m, 1F, PhF<sub>4</sub>), -149.04 (td, 1F, *J* = 19.0 Hz), -156.16 (t, 1F, *J* = 19.0 Hz), -163.04 (td, 1F, *J* = 19.0 Hz); <sup>1</sup>H NMR 400 MHz [20mM, (CD<sub>3</sub>)<sub>2</sub>SO]  $\delta$  ppm (~100 %): 3.36 [s, 3H, C(O)-N <sub>$\alpha$</sub> -CH<sub>3</sub>], 3.33 [s, 3H, N <sub>$\beta$</sub> -CH<sub>3</sub>]; <sup>19</sup>F NMR 376 MHz [20mM, (CD<sub>3</sub>)<sub>2</sub>SO]  $\delta$  ppm (~100 %): -146.55 to -146.67 (m, 1F), -151.38 (td, 1F, *J* = 19.0 Hz), -156.47 (t, 1F, *J* = 19.0 Hz), -165.71 (td, 1F, *J* = 19.0 Hz); <sup>13</sup>C NMR (100 MHz, CDCl<sub>3</sub>)  $\delta$  ppm (~100 %): 159.0 (d, <sup>3</sup>J<sub>C-F4</sub> = 3.0 Hz), 143.9 (dtd, <sup>1</sup>J<sub>CF</sub> = 254 Hz, <sup>2</sup>J<sub>CF</sub> = 15.0 Hz, <sup>3</sup>J<sub>CF</sub> = 3.0 Hz), 142.7 (ddt, <sup>1</sup>J<sub>CF</sub> = 260 Hz, <sup>2</sup>J<sub>CF</sub> = 12.0 Hz, <sup>3</sup>J<sub>CF</sub> = 3.0 Hz), 136.5 (dt, <sup>1</sup>J<sub>CF</sub> = 248 Hz, <sup>2</sup>J<sub>CF</sub> = 15.0 Hz), 134.9 (ddd, <sup>1</sup>J<sub>CF</sub> = 250 Hz, <sup>2</sup>J<sub>CF</sub> = 15.0 Hz, <sup>2</sup>J<sub>CF</sub> = 15.0 Hz), 134.3-134.1 (m), 105.0 (d, <sup>2</sup>J<sub>C-F4</sub> = 15.0 Hz), 38.2 (d, *J* = 5.0 Hz, F1···H<sub>3</sub>C-N <sub>$\beta$</sub> ), 29.1; HRMS [M + H]<sup>+</sup> calcd. for, C<sub>9</sub>H<sub>7</sub>F<sub>4</sub>N<sub>2</sub>O, m/z: 235.0495; found m/z: 235.0493.

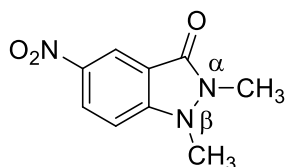

Compound **16C**: 1, 2-dimethyl-5-nitro-1*H*-indazol-3(2*H*)-one.

Yield (%): 96 % as a yellow solid.

<sup>1</sup>H NMR 400 MHz (20mM, CDCl<sub>3</sub>) δ ppm (~100 %): 8.78 (d, 1H, *J* = 4.0 Hz, para-NO<sub>2</sub>-Ph), 8.40 (dd, 1H, *J* = 8.0 Hz, para-NO<sub>2</sub>-Ph), 7.22 (d, 1H, *J* = 12.0 Hz, para-NO<sub>2</sub>-Ph), 3.52 [s, 3H, C(O)-N<sub>α</sub>-CH<sub>3</sub>], 3.47 [s, 3H, N<sub>β</sub>-CH<sub>3</sub>]; <sup>1</sup>H NMR 400 MHz [20mM, (CD<sub>3</sub>)<sub>2</sub>SO] δ ppm (~100 %): 8.46 (d, 1H, *J* = 4.0 Hz, para-NO<sub>2</sub>-Ph), 8.37 (dd, 1H, *J* = 8.0 Hz, para-NO<sub>2</sub>-Ph), 7.68 (d, 1H, *J* = 12.0 Hz, para-NO<sub>2</sub>-Ph), 3.60 [s, 3H, C(O)-N<sub>α</sub>-CH<sub>3</sub>], 3.45 [s, 3H, N<sub>β</sub>-CH<sub>3</sub>]; <sup>13</sup>C NMR (100 MHz, CDCl<sub>3</sub>) δ ppm (~100 %): 161.4, 150.4, 142.7, 127.4, 121.6, 117.5, 110.7, 35.9, 29.3; HRMS [M + H]<sup>+</sup> calcd. for, C<sub>9</sub>H<sub>10</sub>N<sub>3</sub>O<sub>3</sub>, m/z: 208.0722; found m/z: 208.0721.

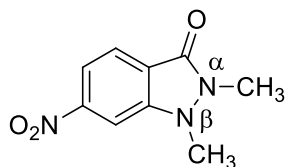

Compound **17C**: 1, 2-dimethyl-6-nitro-1*H*-indazol-3(2*H*)-one.

Yield (%): 93 % as an orange solid.

<sup>1</sup>H NMR 400 MHz (20mM, CDCl<sub>3</sub>) δ ppm (~100 %): 8.09 (brs, 1H, meta-NO<sub>2</sub>-Ph), 8.01-8.00 (m, 1H, meta-NO<sub>2</sub>-Ph), 3.51 [s, 3H, C(O)-N<sub>α</sub>-CH<sub>3</sub>], 3.40 [s, 3H, N<sub>β</sub>-CH<sub>3</sub>]; <sup>1</sup>H NMR 400 MHz [20mM, (CD<sub>3</sub>)<sub>2</sub>SO] δ ppm (~100 %): 8.53 (brs, 1H, meta-NO<sub>2</sub>-Ph), 7.91 (m, 2H, meta-NO<sub>2</sub>-Ph-F), 3.49 [s, 3H, C(O)-N<sub>α</sub>-CH<sub>3</sub>], 3.43 [s, 3H, N<sub>β</sub>-CH<sub>3</sub>]; <sup>13</sup>C NMR (100 MHz, CDCl<sub>3</sub>) δ ppm (~100 %): 161.1, 150.8, 148.8, 125.5, 123.0, 117.0, 107.4, 37.2, 29.4; HRMS [M + H]<sup>+</sup> calcd. for, C<sub>9</sub>H<sub>10</sub>N<sub>3</sub>O<sub>3</sub>, m/z: 208.0722; found m/z: 208.0732.

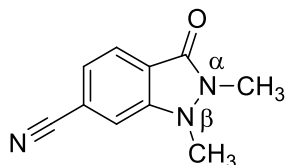

Compound **18C**: 1, 2-dimethyl-3-oxo-2, 3-dihydro-1*H*-indazole-6-carbonitrile.

Yield (%): 90 % as an off-white solid.

$^1\text{H}$  NMR 400 MHz (20mM,  $\text{CDCl}_3$ )  $\delta$  ppm (~100 %): 7.95 (d, 1H,  $J = 8.0$  Hz, meta-CN-Ph), 7.50 (s, 1H, meta-CN-Ph), 7.41 (d, 1H,  $J = 8.0$  Hz, meta-CN-Ph), 3.49 [s, 3H, C(O)- $\text{N}_\alpha$ - $\text{CH}_3$ ], 3.33 [s, 3H,  $\text{N}_\beta$ - $\text{CH}_3$ ];  $^1\text{H}$  NMR 400 MHz [20mM,  $(\text{CD}_3)_2\text{SO}$ ]  $\delta$  ppm (~100 %): 8.21 (s, 1H, meta-CN-Ph), 7.85 (d, 1H,  $J = 8.0$  Hz, meta-CN-Ph), 7.51 (d, 1H,  $J = 8.0$  Hz, meta-CN-Ph), 3.41 [s, 3H, C(O)- $\text{N}_\alpha$ - $\text{CH}_3$ ], 3.40 [s, 3H,  $\text{N}_\beta$ - $\text{CH}_3$ ];  $^{13}\text{C}$  NMR (100 MHz,  $\text{CDCl}_3$ )  $\delta$  ppm (~100 %): 161.4, 148.7, 125.4, 125.1, 121.8, 118.4, 115.8, 115.4, 37.3, 29.3; HRMS  $[\text{M} + \text{H}]^+$  calcd. for,  $\text{C}_{10}\text{H}_{10}\text{N}_3\text{O}$ ,  $m/z$ : 188.0824; found  $m/z$ : 188.0835.

## F. Supplementary figures and tables.

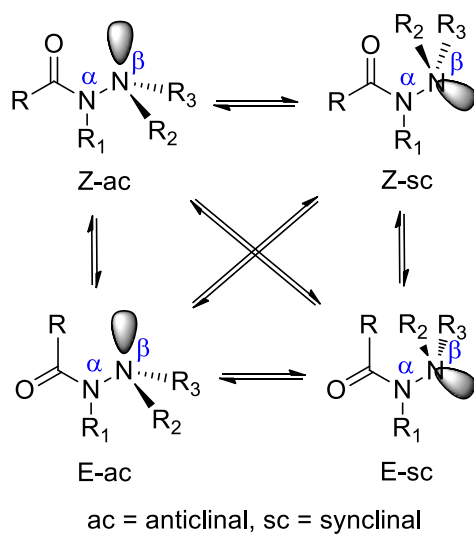

### Symmetrical $N_{\alpha}$ -Acyl-hydrazines

**Figure S1.** Four different rotamers were possible based on E/Z isomerisation of the amide bond, the lone pair of  $\beta$ -nitrogen and when the both substituent at  $\beta$ -nitrogen are same ( $R_2 = R_3$ ).

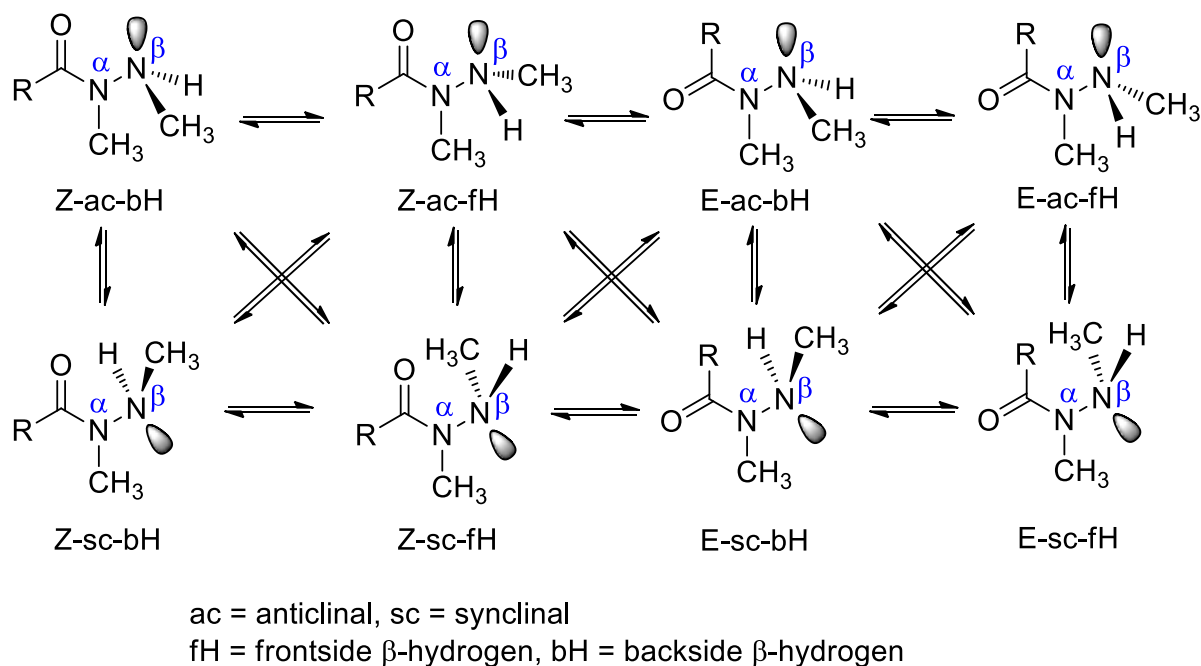

### Unsymmetrical $N_{\alpha}$ -Acyl-hydrazines

**Figure S2.** Eight different rotamers were possible based on E/Z isomerisation of the amide bond, the lone pair of  $\beta$ -nitrogen and when the both substituent at  $\beta$ -nitrogen are different ( $R_2 \neq R_3$ ).

**Table S1.** Zero-point corrected relative electronic energies  $\Delta(E+ZPE)$  of **1-6** in kcal·mol<sup>-1</sup>.
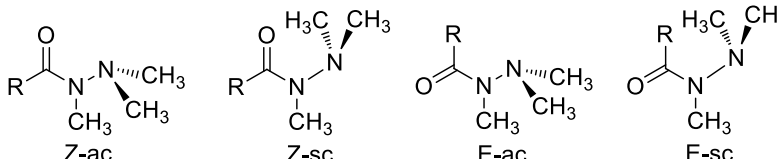

| Comp     | Conformation        |      |      |      |      |
|----------|---------------------|------|------|------|------|
|          | R                   | Z-ac | Z-sc | E-ac | E-sc |
| <b>1</b> | NMe <sub>2</sub> Ph | 4.02 | 1.34 | 0.00 | 4.12 |
| <b>2</b> | OMePh               | 4.56 | 1.84 | 0.00 | 4.49 |
| <b>3</b> | Ph                  | 4.16 | 1.36 | 0.00 | 4.23 |
| <b>4</b> | CF <sub>3</sub> Ph  | 4.96 | 1.99 | 0.00 | 4.88 |
| <b>5</b> | CNPh                | 4.99 | 2.10 | 0.00 | 4.90 |
| <b>6</b> | NO <sub>2</sub> Ph  | 5.05 | 2.25 | 0.00 | 4.77 |

**Table S2.** Relative electronic energies  $\Delta E$  of **1-6** in kcal·mol<sup>-1</sup>.
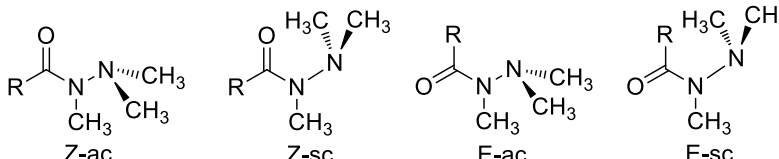

| Comp     | Conformation        |      |      |      |      |
|----------|---------------------|------|------|------|------|
|          | R                   | Z-ac | Z-sc | E-ac | E-sc |
| <b>1</b> | NMe <sub>2</sub> Ph | 4.27 | 1.28 | 0.00 | 4.29 |
| <b>2</b> | OMePh               | 4.42 | 1.50 | 0.00 | 4.66 |
| <b>3</b> | Ph                  | 4.37 | 1.39 | 0.00 | 4.35 |
| <b>4</b> | CF <sub>3</sub> Ph  | 4.88 | 1.93 | 0.00 | 4.93 |
| <b>5</b> | CNPh                | 5.03 | 2.10 | 0.00 | 5.14 |
| <b>6</b> | NO <sub>2</sub> Ph  | 5.10 | 2.20 | 0.00 | 5.19 |

**Table S3.** Relative Gibbs free energies  $\Delta G$  of **1-6** in kcal·mol<sup>-1</sup>.
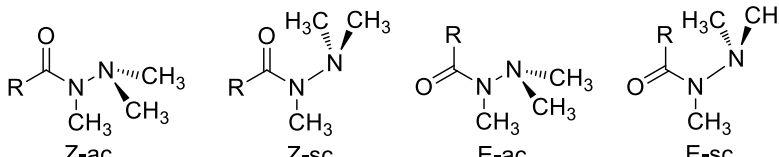

| Comp     | Conformation        |      |      |      |      |
|----------|---------------------|------|------|------|------|
|          | R                   | Z-ac | Z-sc | E-ac | E-sc |
| <b>1</b> | NMe <sub>2</sub> Ph | 3.89 | 1.20 | 0.00 | 4.04 |
| <b>2</b> | OMePh               | 4.71 | 1.99 | 0.00 | 4.13 |
| <b>3</b> | Ph                  | 4.11 | 1.20 | 0.00 | 3.95 |
| <b>4</b> | CF <sub>3</sub> Ph  | 5.21 | 1.82 | 0.00 | 4.79 |
| <b>5</b> | CNPh                | 5.02 | 1.96 | 0.00 | 4.49 |
| <b>6</b> | NO <sub>2</sub> Ph  | 5.22 | 2.29 | 0.00 | 4.24 |

**Table S4.** Optimized structural parameters and NBO stabilization energies of the E-ac conformers of **1-6** computed at M06-2X/6-311+G(2d,p) level of theory.

| Comp     | R                    | $E^2$ $n_{N\beta} \rightarrow \pi^*_{Ar}$<br>kcal.mol <sup>-1</sup> | $\sigma_P$ | $\Delta N_\beta$<br>Å | $\Delta C_{Ph}$<br>Å | $d_{N...C}$<br>Å | $E^2$ $n_O \rightarrow \sigma^*_{C-H}$<br>kcal.mol <sup>-1</sup> | $d_{O...C}$<br>Å |
|----------|----------------------|---------------------------------------------------------------------|------------|-----------------------|----------------------|------------------|------------------------------------------------------------------|------------------|
|          |                      |                                                                     |            |                       |                      |                  |                                                                  |                  |
| <b>1</b> | NMe <sub>2</sub> -Ph | 1.27                                                                | -0.83      | 0.406                 | 0.033                | 2.845            | 1.23                                                             | 2.635            |
| <b>2</b> | OMe-Ph               | 1.44                                                                | -0.27      | 0.407                 | 0.034                | 2.833            | 1.17                                                             | 2.644            |
| <b>3</b> | Ph                   | 1.47                                                                | 0.00       | 0.407                 | 0.035                | 2.826            | 1.11                                                             | 2.653            |
| <b>4</b> | CF <sub>3</sub> -Ph  | 1.60                                                                | 0.54       | 0.409                 | 0.035                | 2.816            | 1.06                                                             | 2.659            |
| <b>5</b> | CN-Ph                | 1.62                                                                | 0.66       | 0.410                 | 0.036                | 2.815            | 1.06                                                             | 2.661            |
| <b>6</b> | NO <sub>2</sub> -Ph  | 1.66                                                                | 0.78       | 0.411                 | 0.035                | 2.812            | 1.03                                                             | 2.665            |

$E^2$  = Second order perturbation energies calculated as kcal.mol<sup>-1</sup>,  $n_{N\beta} \rightarrow \pi^*_{Ar}$  = lone pair of  $\beta$ -nitrogen delocalized into the antibonding  $\pi$  orbital of the Ph ring,  $\sigma_P$  = Hammett constant,  $\Delta N_\beta$  = Pyramidality at  $\beta$ -nitrogen,  $\Delta C_{Ph}$  = Pyramidality at Cipso in aromatic Ph ring,  $d_{N...C}$  = distances between  $\beta$ -nitrogen and Cipso of the Ph ring in Angstrom (Å), NBO values were observed at above 0.05 kcal.mol<sup>-1</sup> threshold.

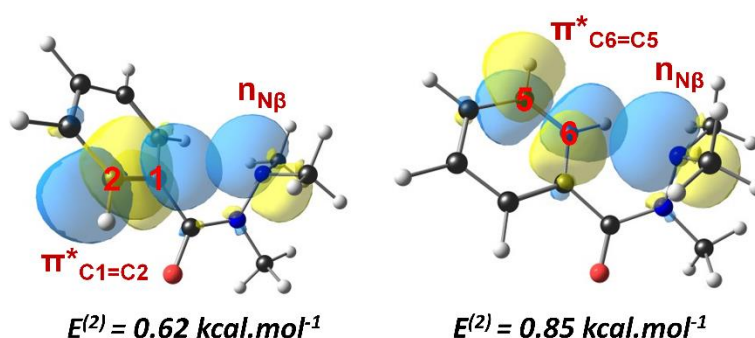

**Figure S3.**  $n_{N\beta} \rightarrow \pi^*_{Ar}$  interaction NBO orbital overlaps involving the  $\beta$ -nitrogen lone pair ( $n_{N\beta}$ ) and two different antibonding  $\pi^*_{C=C}$  orbitals of the phenyl ring in **3**.

**Table S5.** X-ray crystallographic structural parameters and NBO stabilization energies of the E-ac conformers of **2-3** and **5-6** computed using crystallographic atomic coordinates.

| Comp     | R                   | $E^2$ $n_N \rightarrow \pi^*_{Ar}$<br>kcal.mol <sup>-1</sup> | $\sigma_P$ | $\Delta N_\beta$<br>Å | $\Delta C_{Ph}$<br>Å | $d_{N...C}$<br>Å |
|----------|---------------------|--------------------------------------------------------------|------------|-----------------------|----------------------|------------------|
|          |                     |                                                              |            |                       |                      |                  |
| <b>2</b> | OMe-Ph              | 1.67                                                         | -0.27      | 0.421                 | 0.041                | 2.785            |
| <b>3</b> | Ph                  | 2.09                                                         | 0.00       | 0.426                 | 0.032                | 2.712            |
| <b>5</b> | CN-Ph               | 2.48                                                         | 0.66       | 0.416                 | 0.035                | 2.694            |
| <b>6</b> | NO <sub>2</sub> -Ph | 2.53                                                         | 0.78       | 0.425                 | 0.037                | 2.691            |

NBO values were observed at above 0.05 kcal.mol<sup>-1</sup> threshold.

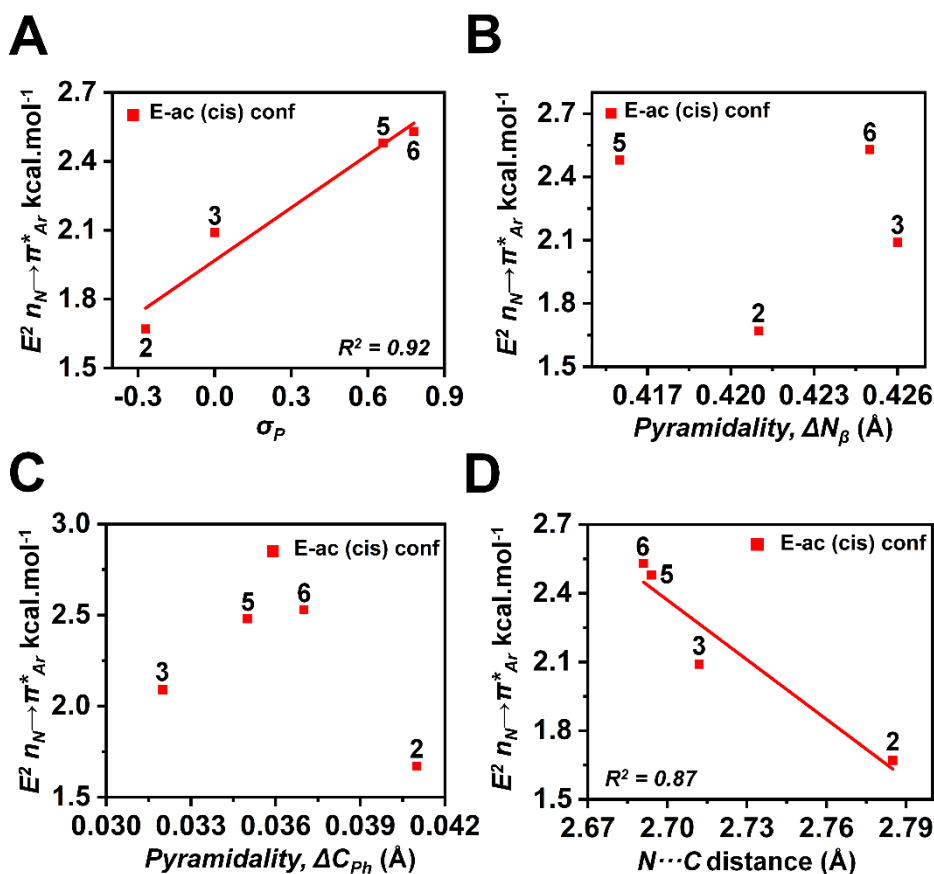

**Figure S4.** (A) Increase in the  $n_N \rightarrow \pi^*_{Ar}$  interactions from **2**, **3** to **5**, **6** with increase in electron withdrawing ability of the p-substituent in the phenyl ring. (B) Positive pyramidity of the donor nitrogen vs  $n_N \rightarrow \pi^*_{Ar}$  interactions of **2**, **3** to **5**, **6**. (C) Positive pyramidity of the phenyl carbon vs  $n_N \rightarrow \pi^*_{Ar}$  interactions of **2**, **3** to **5**, **6** and (D) Increase in the  $n_N \rightarrow \pi^*_{Ar}$  interactions from **2**, **3** to **5**, **6** with decrease in donor-acceptor distance ( $N \cdots C$ ).

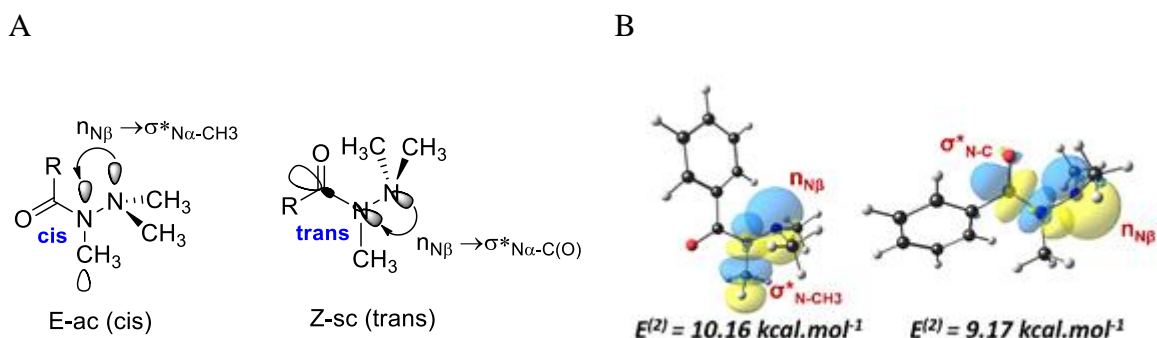

**Figure S5.** (A) Pictorial representations of  $n_{N\beta} \rightarrow \sigma^*_{N-\text{CH}_3}$  and  $n_{N\beta} \rightarrow \sigma^*_{N-\text{C}(\text{O})}$  interactions in the E-ac and Z-sc isomers, respectively. (B) NBO  $n_{N\beta} \rightarrow \sigma^*_{N-\text{CH}_3}$  orbital interaction in the E-ac isomer of **3** and (B)  $n_{N\beta} \rightarrow \sigma^*_{N-\text{C}(\text{O})}$  orbital interaction in the Z-sc isomer of **3**.

**Table S6.** NBO stabilization energies due to anomeric interactions in the E-ac, Z-sc, Z-ac and E-sc isomers of **1-6**. [cis and trans denotes for the amide bond O=C-N $\alpha$ -CH $_3$ ]

| Comp             | E-ac (cis)                                           |                                                      | Z-sc (trans)                                         |                                                      | Z-ac (trans)                                         |                                                      | E-sc (cis)                                           |                                                      |
|------------------|------------------------------------------------------|------------------------------------------------------|------------------------------------------------------|------------------------------------------------------|------------------------------------------------------|------------------------------------------------------|------------------------------------------------------|------------------------------------------------------|
|                  | $E^2 n_{N\beta} \rightarrow \sigma^*_{N\alpha-CH_3}$ | $E^2 n_{N\beta} \rightarrow \sigma^*_{N\alpha-C(O)}$ | $E^2 n_{N\beta} \rightarrow \sigma^*_{N\alpha-CH_3}$ | $E^2 n_{N\beta} \rightarrow \sigma^*_{N\alpha-C(O)}$ | $E^2 n_{N\beta} \rightarrow \sigma^*_{N\alpha-CH_3}$ | $E^2 n_{N\beta} \rightarrow \sigma^*_{N\alpha-C(O)}$ | $E^2 n_{N\beta} \rightarrow \sigma^*_{N\alpha-CH_3}$ | $E^2 n_{N\beta} \rightarrow \sigma^*_{N\alpha-C(O)}$ |
| kcal.mol $^{-1}$ |                                                      |                                                      |                                                      |                                                      |                                                      |                                                      |                                                      |                                                      |
| <b>1</b>         | 10.12                                                | 2.16                                                 | 1.59                                                 | 9.15                                                 | 9.74                                                 | 1.47                                                 | 2.90                                                 | 7.78                                                 |
| <b>2</b>         | 10.13                                                | 2.16                                                 | 1.63                                                 | 9.18                                                 | 9.77                                                 | 1.50                                                 | 2.92                                                 | 7.93                                                 |
| <b>3</b>         | 10.16                                                | 2.18                                                 | 1.66                                                 | 9.17                                                 | 9.76                                                 | 1.51                                                 | 3.04                                                 | 8.11                                                 |
| <b>4</b>         | 10.23                                                | 2.19                                                 | 1.66                                                 | 9.20                                                 | 9.79                                                 | 1.49                                                 | 3.15                                                 | 8.33                                                 |
| <b>5</b>         | 10.27                                                | 2.20                                                 | 1.67                                                 | 9.21                                                 | 9.80                                                 | 1.50                                                 | 3.14                                                 | 8.36                                                 |
| <b>6</b>         | 10.32                                                | 2.23                                                 | 1.67                                                 | 9.22                                                 | 9.82                                                 | 1.51                                                 | 3.25                                                 | 8.45                                                 |

**Table S7.** Sum of NBO stabilization energies listed in Table S6.

| Comp     | R            | E-ac (cis)                        | Z-sc (trans) | Z-ac (trans) | E-sc (cis) |
|----------|--------------|-----------------------------------|--------------|--------------|------------|
|          |              | Overall $E^2$ (kcal.mol $^{-1}$ ) |              |              |            |
| <b>1</b> | NMe $_2$ -Ph | 12.28                             | 10.74        | 11.21        | 10.68      |
| <b>2</b> | OMe-Ph       | 12.29                             | 10.81        | 11.27        | 10.85      |
| <b>3</b> | Ph           | 12.34                             | 10.83        | 11.27        | 11.15      |
| <b>4</b> | CF $_3$ -Ph  | 12.42                             | 10.86        | 11.28        | 11.48      |
| <b>5</b> | CN-Ph        | 12.47                             | 10.88        | 11.30        | 11.50      |
| <b>6</b> | NO $_2$ -Ph  | 12.55                             | 10.89        | 11.33        | 11.70      |

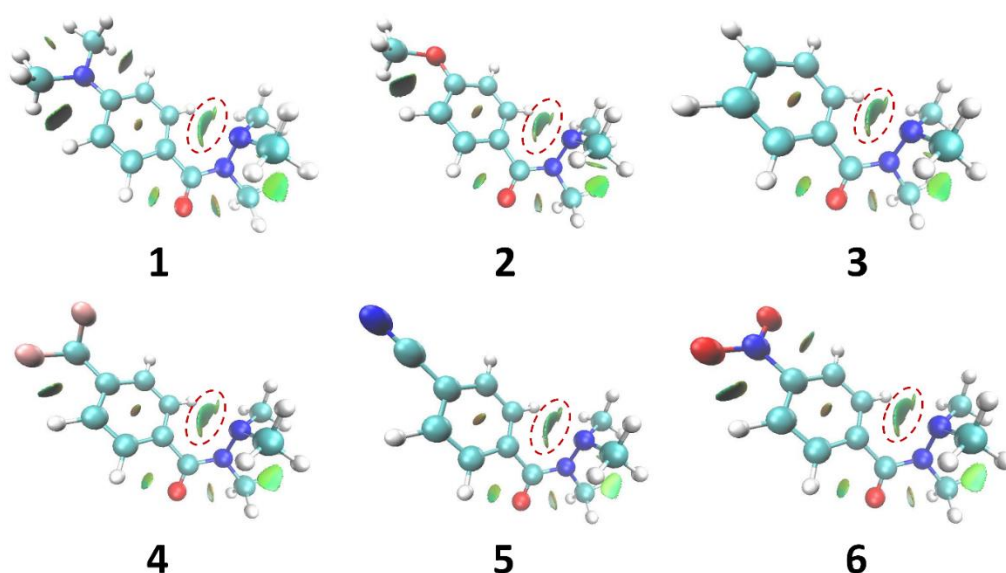

**Figure S6.** Noncovalent Interaction (NCI) plot showing the  $n_N \rightarrow \pi^*_{Ar}$  interaction (red circle marked region) for the optimized geometries of arylhydrazides **1-6**. The reduced density gradient (RDG) isosurface is 0.5 a.u. and colour scale is  $-0.04 < \sin(\lambda_2)\rho < 0.04$  a.u.



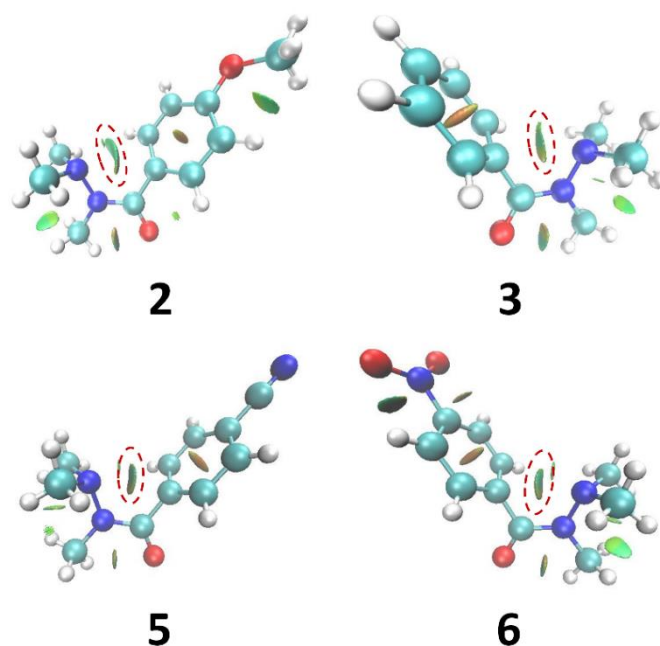

**Figure S7.** Noncovalent Interaction (NCI) plot showing the  $n_{\text{N}} \rightarrow \pi^*_{\text{Ar}}$  interaction (red circle marked region) for the crystal geometries of arylhydrazides **2-3** and **5-6**. The reduced density gradient (RDG) isosurface is 0.5 a.u. and colour scale is  $-0.04 < \sin(\lambda_2)\rho < 0.04$  a.u.

**Table S8.** Zero-point corrected relative electronic energies  $\Delta(E+\text{ZPE})$  of **7**, **9** and **12** in  $\text{kcal.mol}^{-1}$ .

| Comp      | Conformation        |         |         |         |         |         |         |         |         |
|-----------|---------------------|---------|---------|---------|---------|---------|---------|---------|---------|
|           | R                   | Z-sc-fH | E-ac-fH | E-sc-fH | Z-ac-fH | Z-sc-bH | E-ac-bH | E-sc-bH | Z-ac-bH |
| <b>7</b>  | NMe <sub>2</sub> Ph | 0.00    | 1.66    | 3.28    | 6.00    | 1.00    | 1.84    | 2.11    | 5.81    |
| <b>9</b>  | Ph                  | 0.00    | 1.37    | 3.18    | 6.05    | 0.53    | 1.12    | 1.83    | 5.41    |
| <b>12</b> | NO <sub>2</sub> Ph  | 0.00    | 0.81    | NP      | 5.74    | 0.53    | 0.54    | 1.88    | 5.51    |

**Table S9.** Average zero-point corrected relative electronic energies  $\Delta(E+\text{ZPE})$  of **7**, **9** and **12** in  $\text{kcal.mol}^{-1}$ .

| Comp      | Conformation        |      |      |      |      |
|-----------|---------------------|------|------|------|------|
|           | R                   | Z-sc | E-ac | E-sc | Z-ac |
|           | Average             |      |      |      |      |
| <b>7</b>  | NMe <sub>2</sub> Ph | 0.50 | 1.75 | 2.70 | 5.91 |
| <b>9</b>  | Ph                  | 0.27 | 1.25 | 2.51 | 5.73 |
| <b>12</b> | NO <sub>2</sub> Ph  | 0.27 | 0.68 | 1.88 | 5.63 |

**Table S10.** Relative electronic energies  $\Delta E$  of **7**, **9** and **12** in kcal·mol<sup>-1</sup>.

| Comp      | Conformation        |         |         |         |         |         |         |         |         |
|-----------|---------------------|---------|---------|---------|---------|---------|---------|---------|---------|
|           | R                   | Z-sc-fH | E-ac-fH | E-sc-fH | Z-ac-fH | Z-sc-bH | E-ac-bH | E-sc-bH | Z-ac-bH |
| <b>7</b>  | NMe <sub>2</sub> Ph | 0.00    | 1.98    | 3.51    | 6.40    | 0.64    | 1.81    | 2.19    | 5.87    |
| <b>9</b>  | Ph                  | 0.00    | 1.78    | 3.52    | 6.40    | 0.49    | 1.53    | 1.98    | 5.76    |
| <b>12</b> | NO <sub>2</sub> Ph  | 0.00    | 0.76    | NP      | 6.22    | 0.36    | 0.45    | 2.13    | 5.50    |

**Table S11.** Average Relative electronic energies  $\Delta E$  of **7**, **9** and **12** in kcal·mol<sup>-1</sup>.

| Comp      | Conformation        |      |      |      |      |
|-----------|---------------------|------|------|------|------|
|           | R                   | Z-sc | E-ac | E-sc | Z-ac |
| Average   |                     |      |      |      |      |
| <b>7</b>  | NMe <sub>2</sub> Ph | 0.32 | 1.90 | 2.85 | 6.14 |
| <b>9</b>  | Ph                  | 0.25 | 1.66 | 2.75 | 6.08 |
| <b>12</b> | NO <sub>2</sub> Ph  | 0.18 | 0.61 | 2.13 | 5.86 |

**Table S12.** Relative Gibbs free energy  $\Delta G$  of **7**, **9** and **12** in kcal·mol<sup>-1</sup>.

| Comp      | Conformation        |         |         |         |         |         |         |         |         |
|-----------|---------------------|---------|---------|---------|---------|---------|---------|---------|---------|
|           | R                   | Z-sc-fH | E-ac-fH | E-sc-fH | Z-ac-fH | Z-sc-bH | E-ac-bH | E-sc-bH | Z-ac-bH |
| <b>7</b>  | NMe <sub>2</sub> Ph | 0.00    | 1.91    | 3.43    | 6.06    | 1.48    | 2.20    | 2.33    | 6.17    |
| <b>9</b>  | Ph                  | 0.00    | 1.72    | 3.14    | 6.27    | 1.05    | 1.37    | 2.27    | 5.87    |
| <b>12</b> | NO <sub>2</sub> Ph  | 0.00    | 1.00    | NP      | 5.46    | 0.78    | 0.52    | 1.75    | 5.91    |

**Table S13.** Average relative Gibbs free energy  $\Delta G$  of **7**, **9** and **12** in kcal·mol<sup>-1</sup>.

| Comp      | Conformation        |      |      |      |      |
|-----------|---------------------|------|------|------|------|
|           | R                   | Z-sc | E-ac | E-sc | Z-ac |
| Average   |                     |      |      |      |      |
| <b>7</b>  | NMe <sub>2</sub> Ph | 0.74 | 2.06 | 2.88 | 6.12 |
| <b>9</b>  | Ph                  | 0.53 | 1.55 | 2.71 | 6.07 |
| <b>12</b> | NO <sub>2</sub> Ph  | 0.39 | 0.76 | 1.75 | 5.69 |

**Table S14.** Details of Crystallization conditions and their CCDC number. All compounds were crystallized at room temperature except compound **17C**.

| Comp       | Crystallization Solvents    | CCDC    | Resolution (Å) |
|------------|-----------------------------|---------|----------------|
| <b>2</b>   | Ethyl acetate (rt)          | 2087868 | 0.81           |
| <b>5</b>   | Dichloromethane (rt)        | 2093749 | 0.81           |
| <b>6</b>   | Ethyl acetate (rt)          | 2087869 | 0.80           |
| <b>11</b>  | Methanol (rt)               | 2093793 | 0.81           |
| <b>12</b>  | Acetonitrile (rt)           | 2087870 | 0.80           |
| <b>17C</b> | DMSO-d <sub>6</sub> (50 °C) | 2088424 | 0.81           |

**Table S15.** Details of Crystal Structures for **2, 5-6, 11-12 and 17C**.

|                        | <b>2</b>                                                                                    | <b>5</b>                                                                                      | <b>6</b>                                                                    |
|------------------------|---------------------------------------------------------------------------------------------|-----------------------------------------------------------------------------------------------|-----------------------------------------------------------------------------|
| Empirical formula      | C <sub>11</sub> H <sub>16</sub> N <sub>2</sub> O <sub>2</sub>                               | C <sub>11</sub> H <sub>13</sub> N <sub>3</sub> O                                              | C <sub>10</sub> H <sub>13</sub> N <sub>3</sub> O <sub>3</sub>               |
| Formula weight         | 208.26                                                                                      | 203.24                                                                                        | 223.23                                                                      |
| Temperature            | 299 K                                                                                       | 299 K                                                                                         | 298 K                                                                       |
| Wavelength             | 0.71073 Å                                                                                   | 0.71073 Å                                                                                     | 0.71073 Å                                                                   |
| Crystal system         | Monoclinic                                                                                  | Monoclinic                                                                                    | Orthorhombic                                                                |
| Space group            | P 2 <sub>1</sub> /n                                                                         | P 2 <sub>1</sub> /n                                                                           | P b c a                                                                     |
| Unit cell dimensions   | a = 9.779 (3), α = 90.00°<br>b = 12.795 (4), β = 116.78° (10)<br>c = 10.020 (3), γ = 90.00° | a = 6.6018 (4), α = 90.00°<br>b = 13.8377 (10), β = 90.58° (2)<br>c = 12.6315 (8), γ = 90.00° | a = 6.0949 (2) α = 90°<br>b = 9.8024 (3) β = 90°<br>c = 18.4664 (5) γ = 90° |
| Volume                 | 1119.2 (6) Å <sup>3</sup>                                                                   | 1153.9 (13) Å <sup>3</sup>                                                                    | 1103.27 (6) Å <sup>3</sup>                                                  |
| Z                      | 4                                                                                           | 4                                                                                             | 4                                                                           |
| Density                | 1.236 g/cm <sup>3</sup>                                                                     | 1.170 g/cm <sup>3</sup>                                                                       | 1.344 g/cm <sup>3</sup>                                                     |
| Absorption coefficient | 0.086                                                                                       | 0.078                                                                                         | 0.101                                                                       |
| F (000)                | 448.0                                                                                       | 432.0                                                                                         | 472.0                                                                       |

|                            |                        |                        |                        |
|----------------------------|------------------------|------------------------|------------------------|
| Crystal size               | 0.065 X 0.120 X 0.170  | 0.066 X 0.099 X 0.236  | 0.115 X 0.172 X 0.278  |
| Theta max.                 | 26.13                  | 25.91                  | 26.15                  |
| Theta min.                 | 2.78                   | 3.23                   | 2.35                   |
| Reflections collected      | 17371                  | 10384                  | 9571                   |
| Independent reflections    | 2186                   | 2272                   | 2246                   |
| Absorption correction      | Multi-scan with SADABS | Multi-scan with SADABS | Multi-scan with SADABS |
| Max. and min. Transmission | 0.971 and 0.907        | 0.971 and 0.854        | 0.971 and 0.877        |
| Goodness-of-fit on $F^2$   | 1.071                  | 1.090                  | 1.079                  |
| R1 ( $I > 2\sigma(I)$ )    | 0.0429                 | 0.0456                 | 0.0365                 |
| wR2 ( $I > 2\sigma(I)$ )   | 0.1127                 | 0.1245                 | 0.0833                 |
| R1 (all data)              | 0.0560                 | 0.0655                 | 0.0473                 |
| wR2 (all data)             | 0.1238                 | 0.1410                 | 0.0914                 |
| $R_{int}$ (all data)       | 0.0377                 | 0.0310                 | 0.0331                 |

|                      | <b>11</b>                                                                                                         | <b>12</b>                                                                                                      | <b>17C</b>                                                                                                    |
|----------------------|-------------------------------------------------------------------------------------------------------------------|----------------------------------------------------------------------------------------------------------------|---------------------------------------------------------------------------------------------------------------|
| Empirical formula    | C10 H11 N3 O                                                                                                      | C9 H11 N3 O3                                                                                                   | C9 H9 N3 O3                                                                                                   |
| Formula weight       | 189.21                                                                                                            | 209.21                                                                                                         | 207.19                                                                                                        |
| Temperature          | 297 K                                                                                                             | 295 K                                                                                                          | 302 K                                                                                                         |
| Wavelength           | 0.71073 Å                                                                                                         | 0.71073 Å                                                                                                      | 0.71073 Å                                                                                                     |
| Crystal system       | Monoclinic                                                                                                        | Monoclinic                                                                                                     | Orthorhombic                                                                                                  |
| Space group          | P 21/c                                                                                                            | P 21/c                                                                                                         | P n a 21                                                                                                      |
| Unit cell dimensions | a = 7.4997 (6), $\alpha$ = 90.00°<br>b = 18.7572 (15), $\beta$ = 100.33 (3)°<br>c = 7.4345 (7), $\gamma$ = 90.00° | a = 6.8686 (9), $\alpha$ = 90.00°<br>b = 21.053 (3), $\beta$ = 95.02 (4)°<br>c = 7.1521 (9), $\gamma$ = 90.00° | a = 12.3475 (8), $\alpha$ = 90.00°<br>b = 18.8728 (11), $\beta$ = 90.00°<br>c = 3.9943 (2), $\gamma$ = 90.00° |
| Volume               | 1028.9 (15) Å <sup>3</sup>                                                                                        | 1030.2 (2) Å <sup>3</sup>                                                                                      | 930.80 (9) Å <sup>3</sup>                                                                                     |

|                             |                         |                         |                         |
|-----------------------------|-------------------------|-------------------------|-------------------------|
| Z                           | 4                       | 4                       | 4                       |
| Density                     | 1.222 g/cm <sup>3</sup> | 1.349 g/cm <sup>3</sup> | 1.479 g/cm <sup>3</sup> |
| Absorption coefficient      | 0.083                   | 0.104                   | 0.114                   |
| F (000)                     | 400.0                   | 440.0                   | 432.0                   |
| Crystal size                | 0.085 X 0.205 X 0.270   | 0.038 X 0.154 X 0.222   | 0.078 X 0.117 X 0.320   |
| Theta max.                  | 22.98                   | 26.37                   | 25.62                   |
| Theta min.                  | 2.76                    | 1.96                    | 2.72                    |
| Reflections collected       | 26107                   | 13985                   | 9432                    |
| Independent reflections     | 2016                    | 1079                    | 1811                    |
| Absorption correction       | Multi-scan with SADABS  | Multi-scan with SADABS  | Multi-scan with SADABS  |
| Max. and min. Transmission  | 0.971 and 0.900         | 0.970 and 0.881         | 0.971 and 0.862         |
| Goodness-of-fit on $F^2$    | 1.128                   | 1.050                   | 1.113                   |
| R1 ( $I > 2\sigma(I)$ )     | 0.0586                  | 0.0503                  | 0.0348                  |
| wR2 ( $I > 2\sigma(I)$ )    | 0.1639                  | 0.1092                  | 0.0860                  |
| R1 (all data)               | 0.1110                  | 0.1246                  | 0.0440                  |
| wR2 (all data)              | 0.2200                  | 0.1519                  | 0.0937                  |
| R <sub>int</sub> (all data) | 0.0682                  | 0.0851                  | 0.0325                  |

## G. Kinetics Studies for arylhydrazides 14-18.

The cyclization reactions of *N,N'*-dimethylarylhazides **14-18** were carried out in a sealed NMR tubes by  $^1\text{H}$  NMR spectroscopy at ambient temperatures (between 22-25 °C). These reactions were performed in  $[\text{CD}_3]_2\text{SO}$  and  $\text{CDCl}_3$ . Compound **15** was performed with base *t*-BuOK (3 eqv.) in  $[\text{CD}_3]_2\text{SO}$ . Solvent-dependent reactions studies were also performed for compound **14** in  $\text{D}_2\text{O}$  and  $[\text{CD}_3]_2\text{CO}$ .  $^1\text{H}$  NMR Spectra were recorded at various time intervals and the formation of the products for cyclization reaction and the half-life ( $t_{1/2}$ ) values of arylhydrazides were calculated from the relative integration of the peak in arylhydrazide and the corresponding cyclic indazolone.

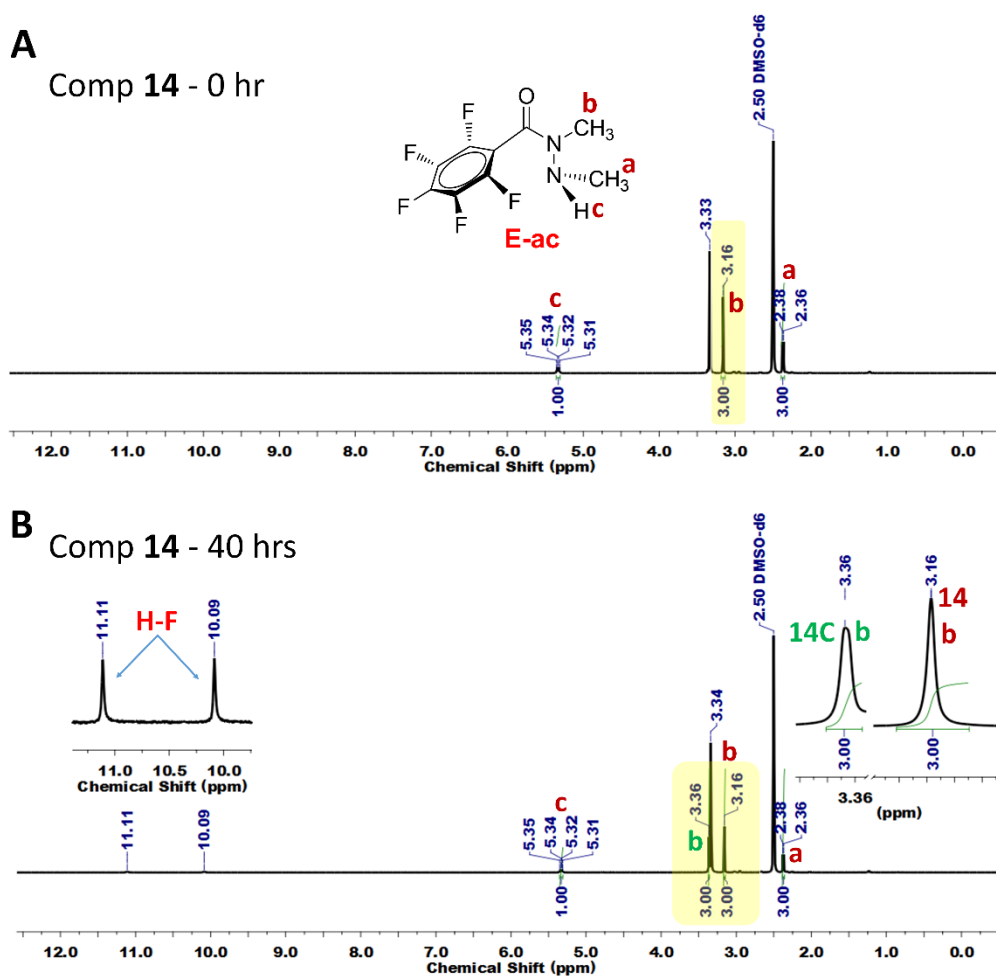

**Figure S8:**  $^1\text{H}$  NMR spectra of **14** and **14C** were recorded in  $\text{DMSO-d}_6$  at (A) 0 hr and (B) 40 hrs.

Similarly,  $^1\text{H}$  NMR of the compounds **15-18** were integrated to find out the percentage of product formation and their  $t_{1/2}$  values.

**Table S16.** <sup>1</sup>H nmr integration values of arylhydrazide **14-15** & **17-18** and cyclic indazolone **14C-15C** & **17C-18C** were recorded at different intervals of time.

| SL. No | Comp <b>14C</b> [(CD <sub>3</sub> ) <sub>2</sub> SO] |                    |                    |                            |                                 | Comp <b>15C</b> [(CD <sub>3</sub> ) <sub>2</sub> SO + t-BuOK] |                    |            |                            |     |
|--------|------------------------------------------------------|--------------------|--------------------|----------------------------|---------------------------------|---------------------------------------------------------------|--------------------|------------|----------------------------|-----|
|        | <sup>1</sup> H-integrating peak                      |                    |                    | <b>14C</b>                 | <sup>1</sup> H-integrating peak |                                                               |                    | <b>15C</b> |                            |     |
|        | Time                                                 | Nα-CH <sub>3</sub> | Nα-CH <sub>3</sub> |                            | Sum                             | Time                                                          | Nα-CH <sub>3</sub> |            | Nα-CH <sub>3</sub>         | Sum |
|        | hrs                                                  | <b>14</b>          | <b>14C</b>         | ( <b>14</b> + <b>14C</b> ) | %                               | hrs                                                           | <b>15</b>          | <b>15C</b> | ( <b>15</b> + <b>15C</b> ) | %   |
| 1      | 0                                                    | 3.00               | 0.00               | 3.00                       | 0                               | 0                                                             | 3.00               | 0.00       | 3.00                       | 0   |
| 2      | 24                                                   | 3.00               | 1.80               | 4.80                       | 38                              | 2                                                             | 3.00               | 0.45       | 3.45                       | 13  |
| 3      | 33                                                   | 3.00               | 2.30               | 5.30                       | 43                              | 4                                                             | 3.00               | 0.48       | 3.48                       | 14  |
| 4      | 40                                                   | 3.00               | 3.00               | 6.00                       | 50                              | 23                                                            | 3.00               | 1.05       | 4.05                       | 26  |
| 5      | 46                                                   | 3.00               | 3.86               | 6.86                       | 56                              | 33                                                            | 3.00               | 1.23       | 4.23                       | 29  |
| 6      | 70                                                   | 3.00               | 7.21               | 10.21                      | 71                              | 48                                                            | 3.00               | 1.67       | 4.67                       | 36  |
| 7      | 118                                                  | 3.00               | 18.40              | 21.40                      | 86                              | 122                                                           | 3.00               | 3.00       | 6.00                       | 50  |
| 8      | 142                                                  | 3.00               | 29.24              | 32.24                      | 91                              | 144                                                           | 3.00               | 3.43       | 6.43                       | 53  |
| 9      | 166                                                  | 3.00               | 41.66              | 44.66                      | 93                              | 172                                                           | 3.00               | 3.82       | 6.82                       | 56  |
| 10     | 190                                                  | 3.00               | 58.40              | 61.40                      | 95                              | 194                                                           | 3.00               | 4.28       | 7.28                       | 59  |
| 11     | 214                                                  | 3.00               | 79.12              | 82.12                      | 96                              | 218                                                           | 3.00               | 4.54       | 7.54                       | 60  |
| 12     | 246                                                  | 3.00               | 154.15             | 157.15                     | 98                              | 288                                                           | 3.00               | 5.80       | 8.80                       | 66  |
| 13     | 299                                                  | 3.00               | 205.36             | 208.36                     | 99                              | 315                                                           | 3.00               | 6.20       | 9.20                       | 67  |
| 14     | 321                                                  | 3.00               | 294.25             | 297.25                     | 99                              | 338                                                           | 3.00               | 6.50       | 9.50                       | 68  |
| 15     | -                                                    | -                  | -                  | -                          | -                               | 363                                                           | 3.00               | 6.77       | 9.77                       | 69  |
| 16     | -                                                    | -                  | -                  | -                          | -                               | 387                                                           | 3.00               | 7.44       | 10.44                      | 71  |

| SL. No | Comp <b>17C</b> [(CD <sub>3</sub> ) <sub>2</sub> SO] |                    |                    |                            |                                 | Comp <b>18C</b> [(CD <sub>3</sub> ) <sub>2</sub> SO] |                    |            |                            |     |
|--------|------------------------------------------------------|--------------------|--------------------|----------------------------|---------------------------------|------------------------------------------------------|--------------------|------------|----------------------------|-----|
|        | <sup>1</sup> H-integrating peak                      |                    |                    | <b>17C</b>                 | <sup>1</sup> H-integrating peak |                                                      |                    | <b>18C</b> |                            |     |
|        | Time                                                 | Nα-CH <sub>3</sub> | Nα-CH <sub>3</sub> |                            | Sum                             | Time                                                 | Nα-CH <sub>3</sub> |            | Nα-CH <sub>3</sub>         | Sum |
|        | hrs                                                  | <b>17</b>          | <b>17C</b>         | ( <b>17</b> + <b>17C</b> ) | %                               | hrs                                                  | <b>18</b>          | <b>18C</b> | ( <b>18</b> + <b>18C</b> ) | %   |
| 1      | 0                                                    | 3.00               | 0.00               | 3.00                       | 0                               | 0                                                    | 3.00               | 0.00       | 3.00                       | 0   |
| 2      | 18                                                   | 3.00               | 0.14               | 3.14                       | 5                               | 23                                                   | 3.00               | 0.16       | 3.16                       | 5   |
| 3      | 71                                                   | 3.00               | 0.44               | 3.44                       | 13                              | 47                                                   | 3.00               | 0.23       | 3.23                       | 7   |
| 4      | 138                                                  | 3.00               | 0.86               | 3.86                       | 22                              | 118                                                  | 3.00               | 0.52       | 3.52                       | 15  |
| 5      | 184                                                  | 3.00               | 1.28               | 4.28                       | 30                              | 166                                                  | 3.00               | 0.80       | 3.80                       | 21  |
| 6      | 233                                                  | 3.00               | 1.77               | 4.77                       | 37                              | 191                                                  | 3.00               | 1.00       | 4.00                       | 25  |
| 7      | 282                                                  | 3.00               | 2.40               | 5.40                       | 44                              | 286                                                  | 3.00               | 1.62       | 4.62                       | 35  |
| 8      | 328                                                  | 3.00               | 3.00               | 6.00                       | 50                              | 334                                                  | 3.00               | 1.86       | 4.86                       | 38  |
| 9      | 377                                                  | 3.00               | 3.80               | 6.80                       | 56                              | 382                                                  | 3.00               | 1.96       | 4.96                       | 40  |
| 10     | 400                                                  | 3.00               | 4.19               | 7.19                       | 58                              | 405                                                  | 3.00               | 2.10       | 5.10                       | 41  |
| 11     | 448                                                  | 3.00               | 5.35               | 8.35                       | 64                              | 453                                                  | 3.00               | 2.40       | 5.40                       | 44  |
| 12     | 496                                                  | 3.00               | 6.60               | 9.60                       | 69                              | 502                                                  | 3.00               | 2.71       | 5.71                       | 47  |
| 13     | 546                                                  | 3.00               | 7.75               | 10.75                      | 72                              | 550                                                  | 3.00               | 2.90       | 5.90                       | 49  |
| 14     | 616                                                  | 3.00               | 10.05              | 13.05                      | 77                              | 580                                                  | 3.00               | 3.00       | 6.00                       | 50  |
| 15     | 664                                                  | 3.00               | 11.50              | 14.50                      | 79                              | 622                                                  | 3.00               | 3.40       | 6.40                       | 53  |
| 16     | 689                                                  | 3.00               | 12.75              | 15.75                      | 81                              | 670                                                  | 3.00               | 3.60       | 6.60                       | 55  |
| 17     | 784                                                  | 3.00               | 19.00              | 22.00                      | 86                              | 863                                                  | 3.00               | 4.85       | 7.85                       | 62  |
| 18     | 880                                                  | 3.00               | 23.05              | 26.05                      | 88                              | 1056                                                 | 3.00               | 7.15       | 10.15                      | 70  |
| 19     | 952                                                  | 3.00               | 24.50              | 27.50                      | 89                              | 1127                                                 | 3.00               | 8.06       | 11.06                      | 73  |
| 20     | 1000                                                 | 3.00               | 28.38              | 31.38                      | 90                              | 1319                                                 | 3.00               | 11.60      | 14.60                      | 79  |
| 21     | 1048                                                 | 3.00               | 30.00              | 33.00                      | 91                              | 1470                                                 | 3.00               | 14.73      | 17.73                      | 83  |

|    |      |      |       |       |    |      |      |       |       |    |
|----|------|------|-------|-------|----|------|------|-------|-------|----|
| 22 | 1120 | 3.00 | 32.15 | 35.15 | 92 | 1654 | 3.00 | 21.00 | 24.00 | 88 |
| 23 | 1168 | 3.00 | 39.10 | 42.10 | 93 | 1729 | 3.00 | 23.85 | 26.85 | 89 |
| 24 | 1360 | 3.00 | 54.08 | 57.08 | 95 | -    | -    | -     | -     | -  |
| 25 | 1624 | 3.00 | 80.04 | 83.04 | 96 | -    | -    | -     | -     | -  |

| SL.<br>No | Comp <b>14C</b> [(CD <sub>3</sub> ) <sub>2</sub> CO] |                                              |                                           |                                 |                                      | Comp <b>14C</b> [D <sub>2</sub> O] |                                              |                                 |                                           |                                      |
|-----------|------------------------------------------------------|----------------------------------------------|-------------------------------------------|---------------------------------|--------------------------------------|------------------------------------|----------------------------------------------|---------------------------------|-------------------------------------------|--------------------------------------|
|           | <sup>1</sup> H-intergating<br>peak                   |                                              |                                           | <b>14C</b><br>Product<br>formed | <sup>1</sup> H-intergating<br>peak   |                                    |                                              | <b>14C</b><br>Product<br>formed |                                           |                                      |
|           | Time                                                 | N $\alpha$ -<br>CH <sub>3</sub><br><b>14</b> | N $\alpha$ -CH <sub>3</sub><br><b>14C</b> |                                 | Sum<br>( <b>14</b> +<br><b>14C</b> ) | Time                               | N $\alpha$ -<br>CH <sub>3</sub><br><b>14</b> |                                 | N $\alpha$ -CH <sub>3</sub><br><b>14C</b> | Sum<br>( <b>14</b> +<br><b>14C</b> ) |
|           | hrs                                                  |                                              |                                           | hrs                             | %                                    | hrs                                |                                              |                                 | hrs                                       | %                                    |
| 1         | 0                                                    | 3.00                                         | 0.00                                      | 3.00                            | 0                                    | 0                                  | 3.00                                         | 0.00                            | 3.00                                      | 0                                    |
| 2         | 23                                                   | 3.00                                         | 0.08                                      | 3.08                            | 3                                    | 23                                 | 3.00                                         | 0.09                            | 3.09                                      | 3                                    |
| 3         | 47                                                   | 3.00                                         | 0.12                                      | 3.12                            | 4                                    | 47                                 | 3.00                                         | 0.15                            | 3.15                                      | 5                                    |
| 4         | 95                                                   | 3.00                                         | 0.19                                      | 3.19                            | 6                                    | 95                                 | 3.00                                         | 0.22                            | 3.22                                      | 7                                    |
| 5         | 161                                                  | 3.00                                         | 0.33                                      | 3.33                            | 10                                   | 161                                | 3.00                                         | 0.29                            | 3.29                                      | 9                                    |
| 6         | 203                                                  | 3.00                                         | 0.39                                      | 3.39                            | 12                                   | 203                                | 3.00                                         | 0.38                            | 3.38                                      | 11                                   |
| 7         | 252                                                  | 3.00                                         | 0.48                                      | 3.48                            | 14                                   | 252                                | 3.00                                         | 0.45                            | 3.45                                      | 13                                   |
| 8         | 348                                                  | 3.00                                         | 0.68                                      | 3.68                            | 18                                   | 349                                | 3.00                                         | 0.61                            | 3.61                                      | 17                                   |
| 9         | 395                                                  | 3.00                                         | 0.81                                      | 3.81                            | 21                                   | 395                                | 3.00                                         | 0.66                            | 3.66                                      | 18                                   |
| 10        | 444                                                  | 3.00                                         | 0.95                                      | 3.95                            | 24                                   | 444                                | 3.00                                         | 0.75                            | 3.75                                      | 20                                   |
| 11        | 492                                                  | 3.00                                         | 1.08                                      | 4.08                            | 26                                   | 492                                | 3.00                                         | 0.88                            | 3.88                                      | 23                                   |
| 12        | 538                                                  | 3.00                                         | 1.25                                      | 4.25                            | 29                                   | 538                                | 3.00                                         | 0.96                            | 3.96                                      | 24                                   |
| 13        | 612                                                  | 3.00                                         | 1.48                                      | 4.48                            | 33                                   | 588                                | 3.00                                         | 1.09                            | 4.09                                      | 27                                   |
| 14        | 659                                                  | 3.00                                         | 1.66                                      | 4.66                            | 36                                   | 659                                | 3.00                                         | 1.29                            | 4.29                                      | 30                                   |
| 15        | 706                                                  | 3.00                                         | 1.98                                      | 4.98                            | 40                                   | 705                                | 3.00                                         | 1.45                            | 4.45                                      | 33                                   |
| 16        | 755                                                  | 3.00                                         | 2.15                                      | 5.15                            | 42                                   | 755                                | 3.00                                         | 1.54                            | 4.54                                      | 34                                   |
| 17        | 826                                                  | 3.00                                         | 2.37                                      | 5.37                            | 44                                   | 863                                | 3.00                                         | 1.91                            | 4.91                                      | 39                                   |
| 18        | 863                                                  | 3.00                                         | 2.56                                      | 5.56                            | 46                                   | 910                                | 3.00                                         | 2.09                            | 5.09                                      | 41                                   |
| 19        | 910                                                  | 3.00                                         | 2.68                                      | 5.68                            | 47                                   | 1006                               | 3.00                                         | 2.40                            | 5.40                                      | 44                                   |
| 20        | 1006                                                 | 3.00                                         | 3.10                                      | 6.10                            | 51                                   | 1054                               | 3.00                                         | 2.56                            | 5.56                                      | 46                                   |
| 21        | 1030                                                 | 3.00                                         | 3.35                                      | 6.35                            | 53                                   | 1103                               | 3.00                                         | 2.70                            | 5.70                                      | 47                                   |
| 22        | 1078                                                 | 3.00                                         | 3.65                                      | 6.65                            | 55                                   | 1174                               | 3.00                                         | 2.88                            | 5.88                                      | 49                                   |
| 23        | 1126                                                 | 3.00                                         | 3.80                                      | 6.80                            | 56                                   | 1222                               | 3.00                                         | 3.00                            | 6.00                                      | 50                                   |
| 24        | 1173                                                 | 3.00                                         | 4.06                                      | 7.06                            | 58                                   | 1270                               | 3.00                                         | 3.07                            | 6.07                                      | 51                                   |
| 25        | 1221                                                 | 3.00                                         | 4.26                                      | 7.26                            | 59                                   | 1342                               | 3.00                                         | 3.25                            | 6.25                                      | 52                                   |
| 26        | 1270                                                 | 3.00                                         | 4.52                                      | 7.52                            | 60                                   | 1390                               | 3.00                                         | 3.51                            | 6.51                                      | 54                                   |
| 27        | 1341                                                 | 3.00                                         | 4.90                                      | 7.90                            | 62                                   | 1582                               | 3.00                                         | 3.88                            | 6.88                                      | 56                                   |
| 28        | 1389                                                 | 3.00                                         | 5.04                                      | 8.04                            | 63                                   | 1773                               | 3.00                                         | 4.50                            | 7.50                                      | 60                                   |
| 29        | 1582                                                 | 3.00                                         | 6.39                                      | 9.39                            | 68                                   | 1844                               | 3.00                                         | 4.81                            | 7.81                                      | 62                                   |
| 30        | 1774                                                 | 3.00                                         | 7.56                                      | 10.56                           | 72                                   | 2036                               | 3.00                                         | 5.88                            | 8.88                                      | 66                                   |
| 31        | 1845                                                 | 3.00                                         | 8.16                                      | 11.16                           | 73                                   | 2189                               | 3.00                                         | 7.10                            | 10.10                                     | 70                                   |
| 32        | 2037                                                 | 3.00                                         | 10.59                                     | 13.59                           | 78                                   | 2372                               | 3.00                                         | 8.29                            | 11.29                                     | 73                                   |
| 33        | 2189                                                 | 3.00                                         | 12.39                                     | 15.39                           | 81                                   | 2447                               | 3.00                                         | 9.09                            | 12.09                                     | 75                                   |
| 34        | 2371                                                 | 3.00                                         | 15.84                                     | 15.84                           | 84                                   | -                                  | -                                            | -                               | -                                         | -                                    |
| 35        | 2446                                                 | 3.00                                         | 21.18                                     | 18.18                           | 86                                   | -                                  | -                                            | -                               | -                                         | -                                    |



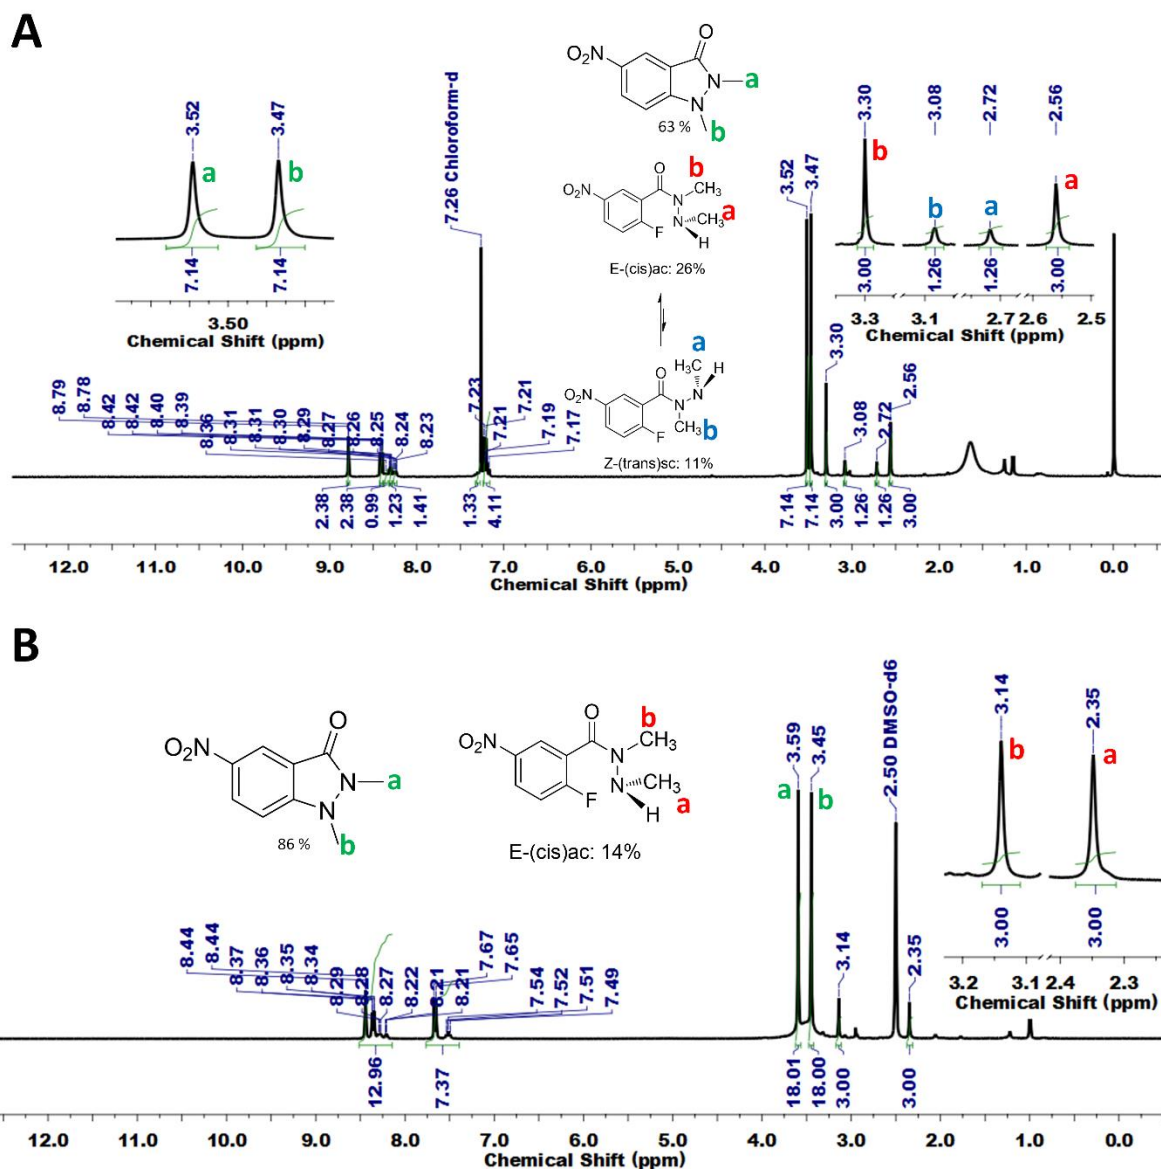

## H. 2D-NOESY spectra of the newly synthesized compounds.

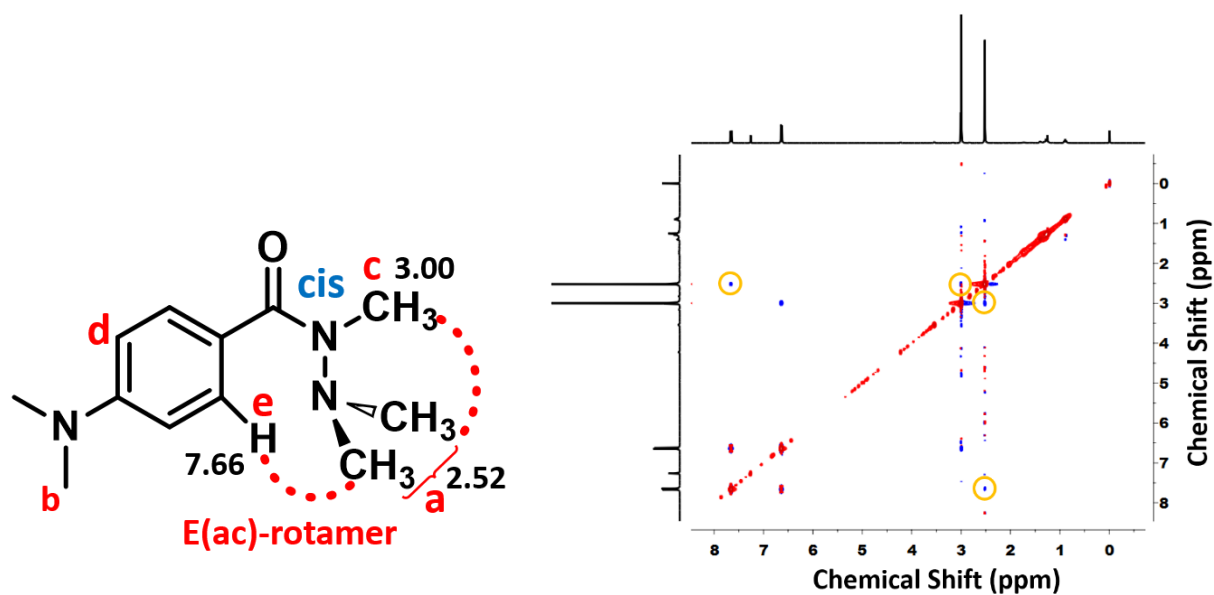

Compound 1

Figure S10 (A). 2D NOESY full spectra for **1** 4-(dimethylamino)-*N,N,N'*-trimethylbenzohydrazide in  $\text{CDCl}_3$ .

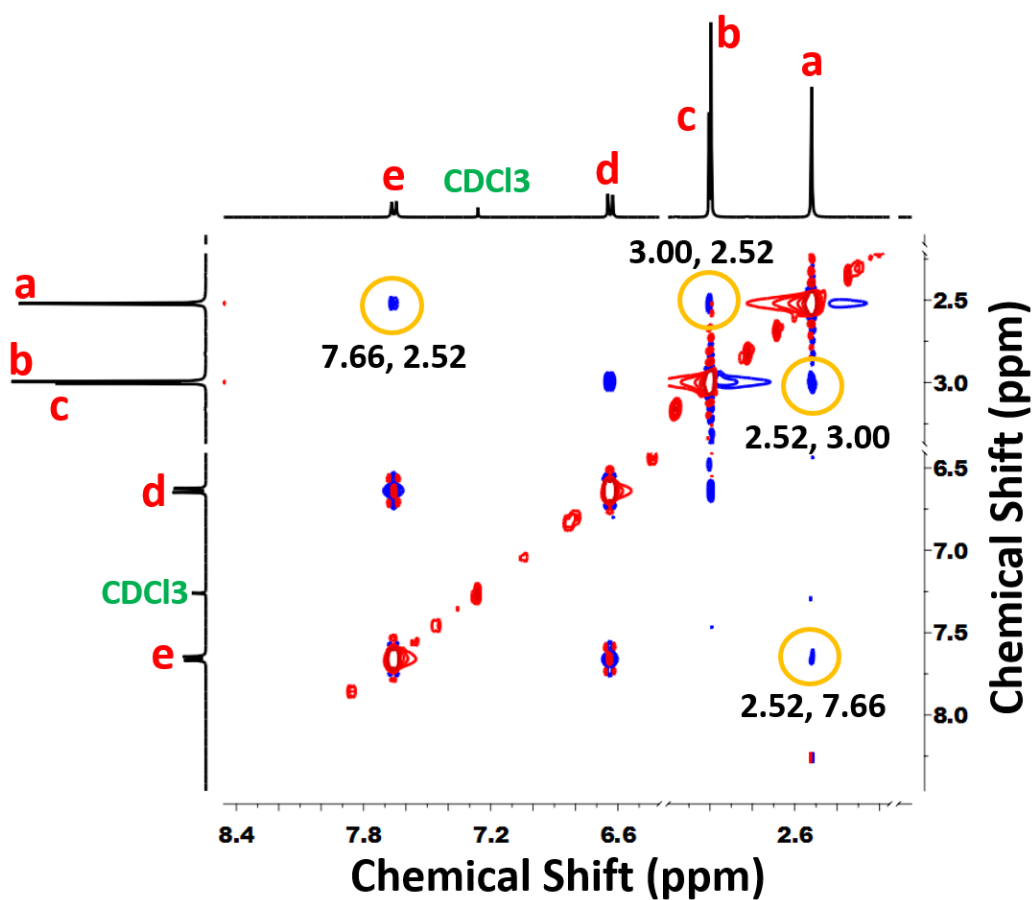

Figure S10 (B). 2D  $^1\text{H}$ - $^1\text{H}$  NOESY Correlation enlarged spectra for **1** 4-(dimethylamino)-*N,N,N'*-trimethylbenzohydrazide in  $\text{CDCl}_3$ .

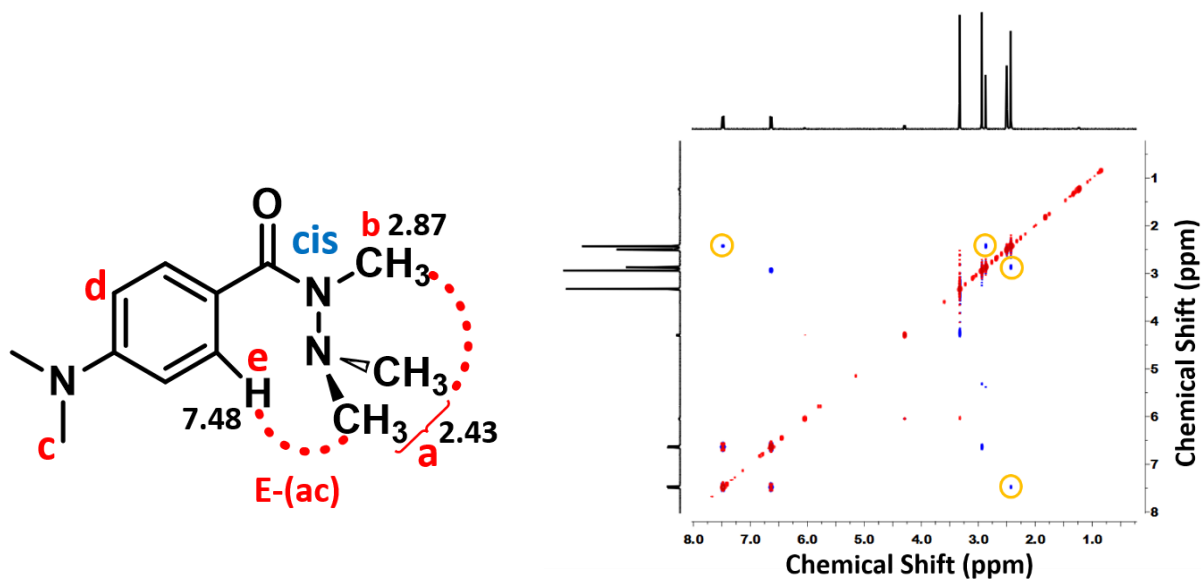

Compound 1

**Figure S11 (A).** 2D NOESY full spectra for **1** 4-(dimethylamino)-*N, N', N'*-trimethylbenzohydrazide in  $[\text{CD}_3]_2\text{SO}$ .

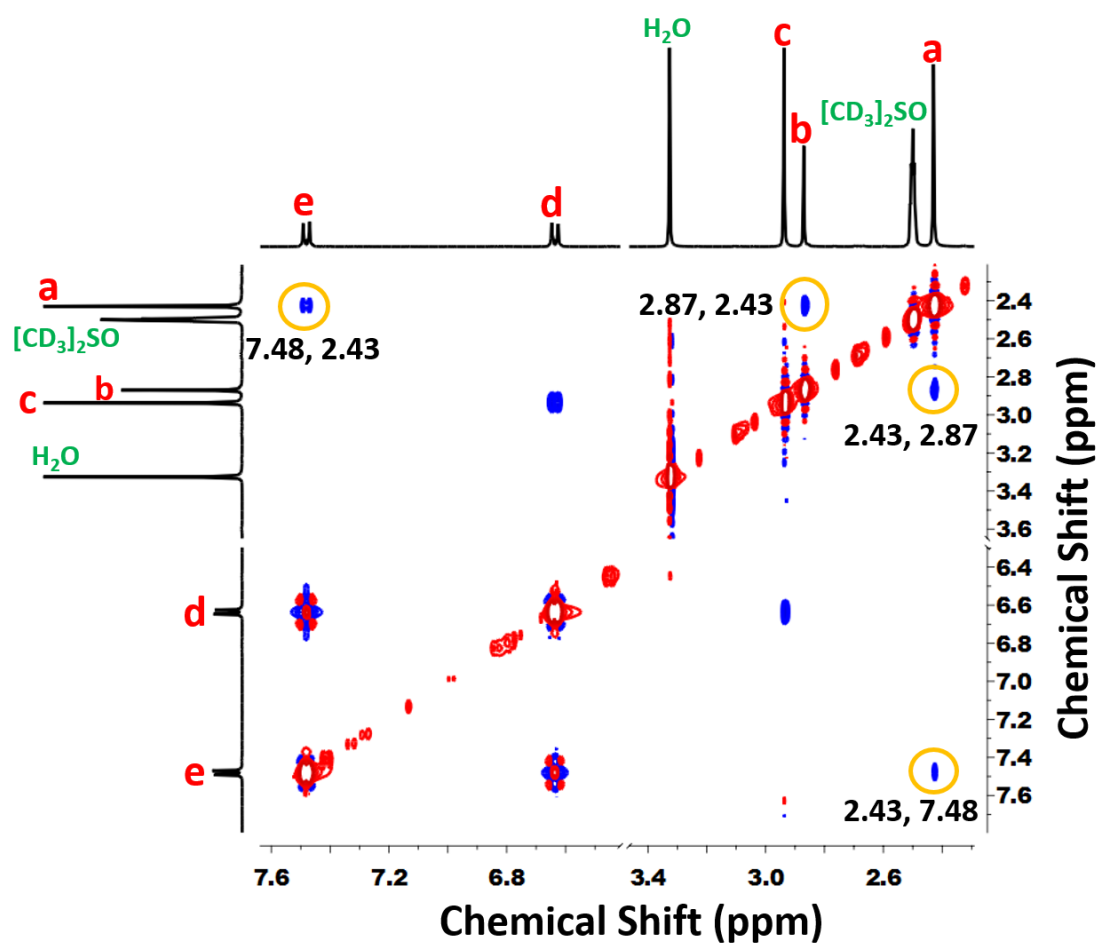

**Figure S11 (B).** 2D  $^1\text{H}$ - $^1\text{H}$  NOESY Correlation enlarged spectra for **1** 4-(dimethylamino)-*N, N', N'*-trimethylbenzohydrazide in  $[\text{CD}_3]_2\text{SO}$ .

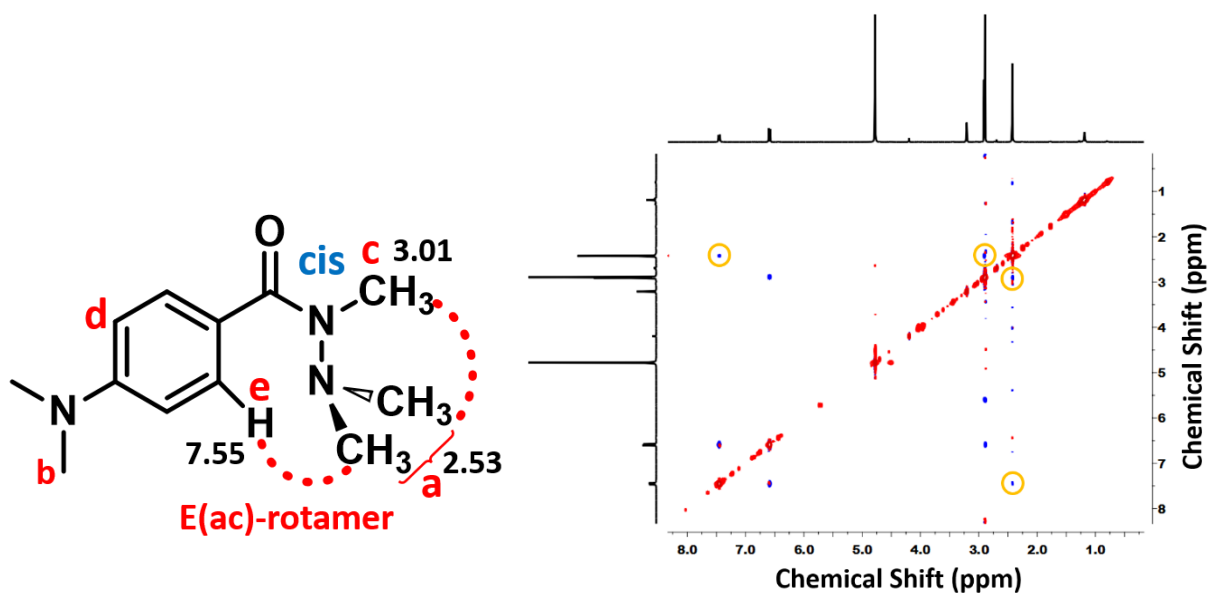

Compound 1

**Figure S12 (A).** 2D NOESY full spectra for **1** 4-(dimethylamino)-*N, N', N'*-trimethylbenzohydrazide in CD<sub>3</sub>OD.

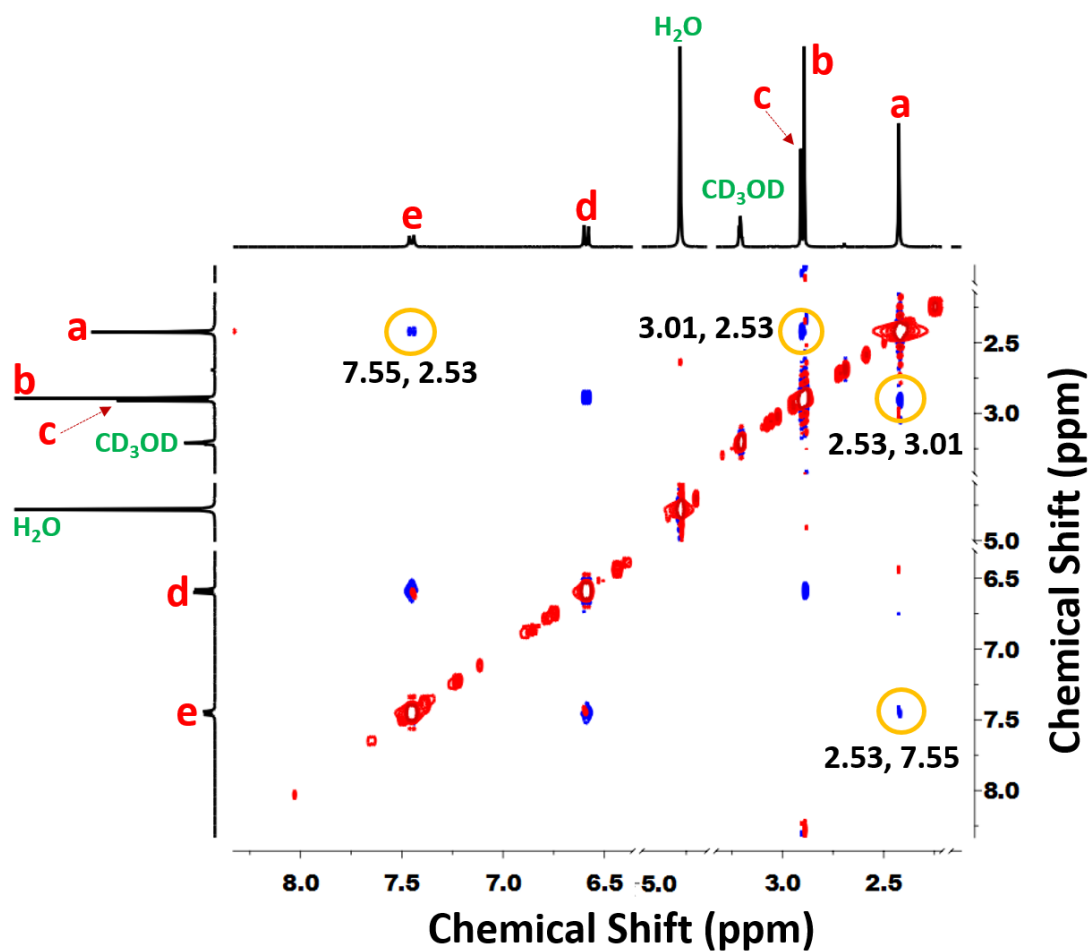

**Figure S12 (B).** 2D <sup>1</sup>H-<sup>1</sup>H NOESY Correlation enlarged spectra for **1** 4-(dimethylamino)-*N, N', N'*-trimethylbenzohydrazide in CD<sub>3</sub>OD.

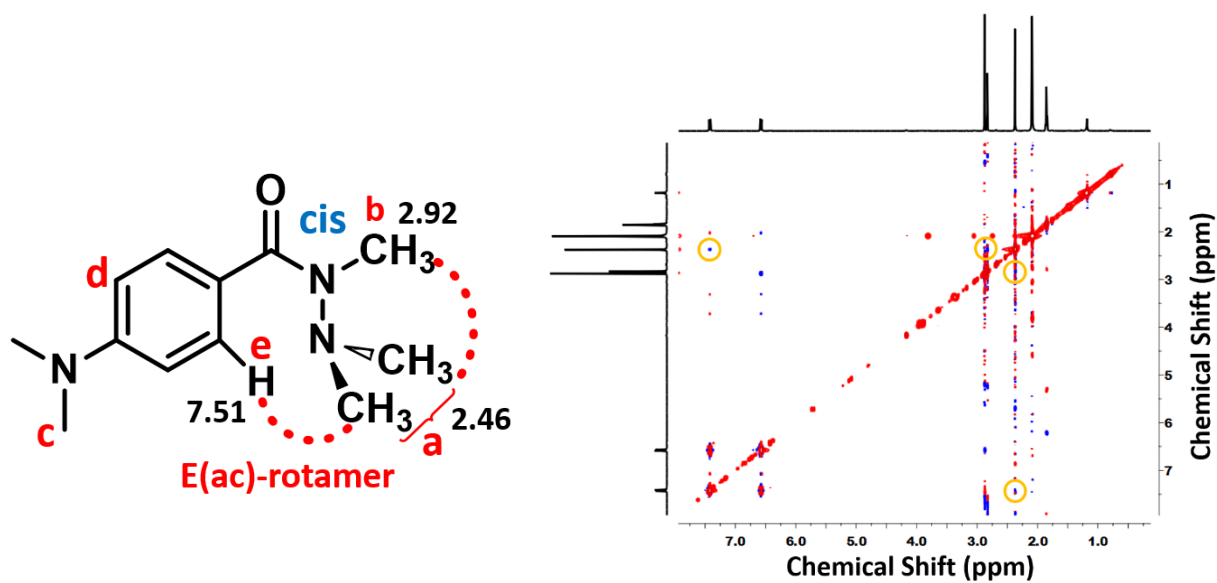

Compound 1

**Figure S13 (A).** 2D NOESY full spectra for **1** 4-(dimethylamino)-*N, N', N'*-trimethylbenzohydrazide in  $\text{CD}_3\text{CN}$ .

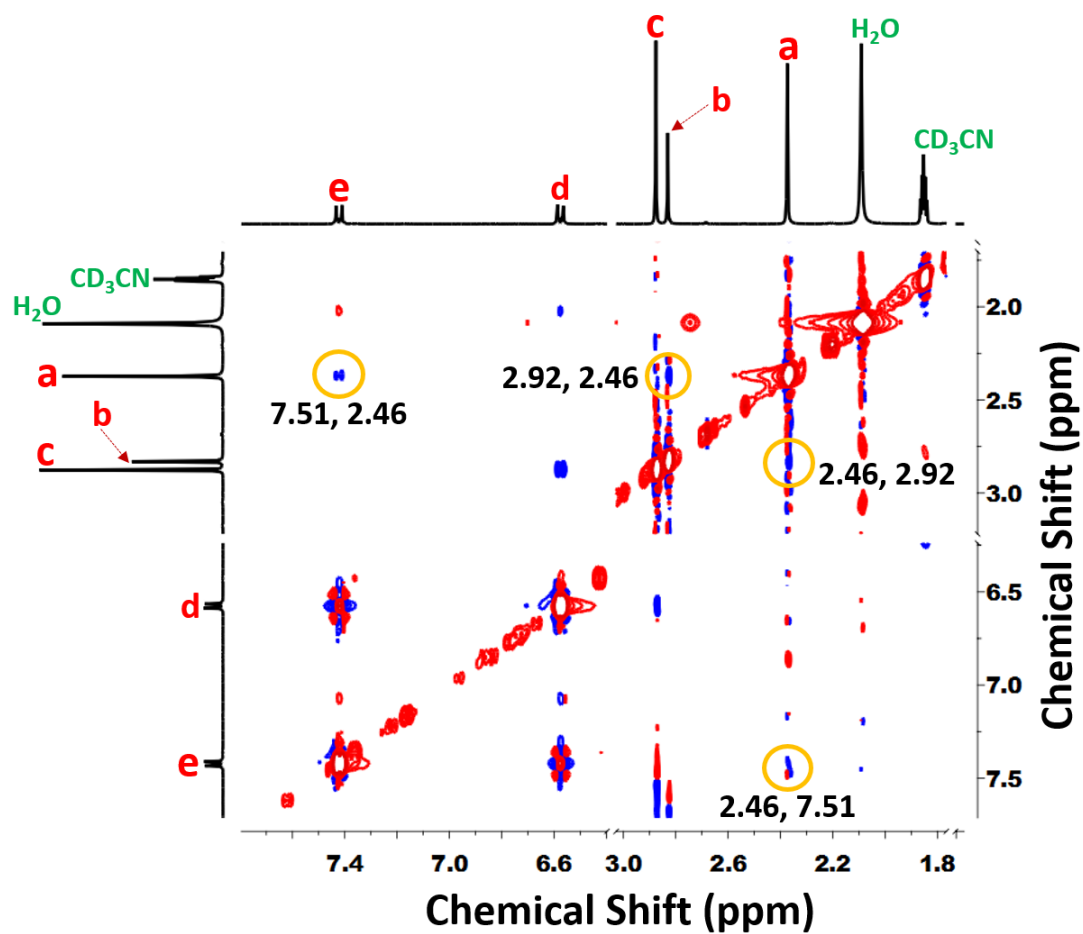

**Figure S13 (B).** 2D  $^1\text{H}$ - $^1\text{H}$  NOESY Correlation enlarged spectra for **1** 4-(dimethylamino)-*N, N', N'*-trimethylbenzohydrazide in  $\text{CD}_3\text{CN}$ .

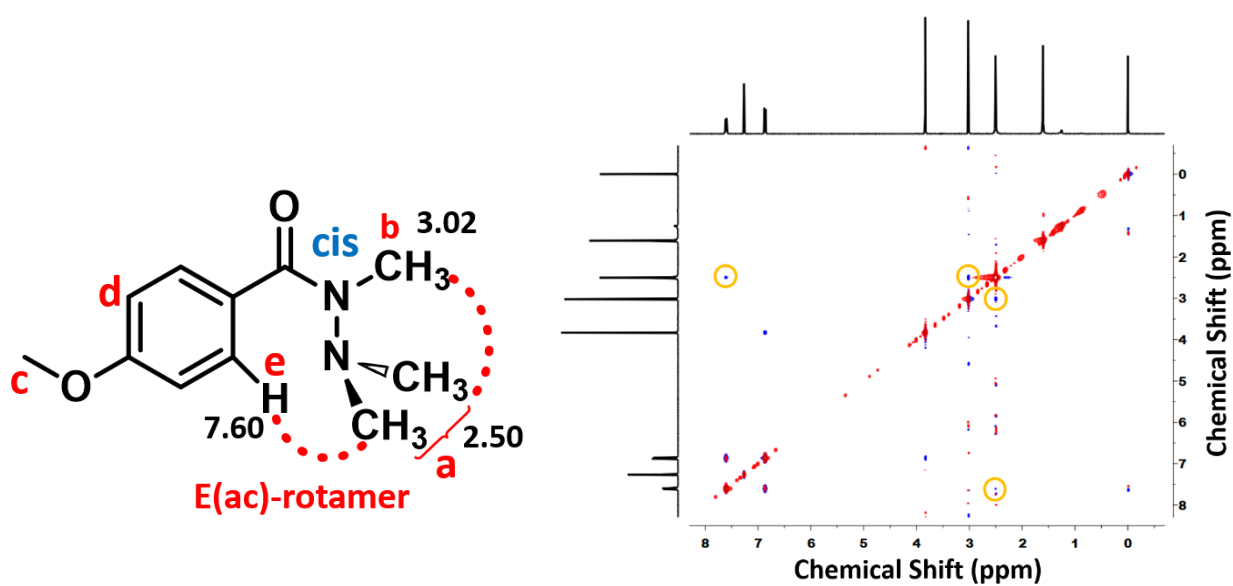

Compound 2

Figure S14 (A). 2D NOESY full spectra for 2 4-methoxy-*N,N,N'*-trimethylbenzohydrazide in CDCl<sub>3</sub>.

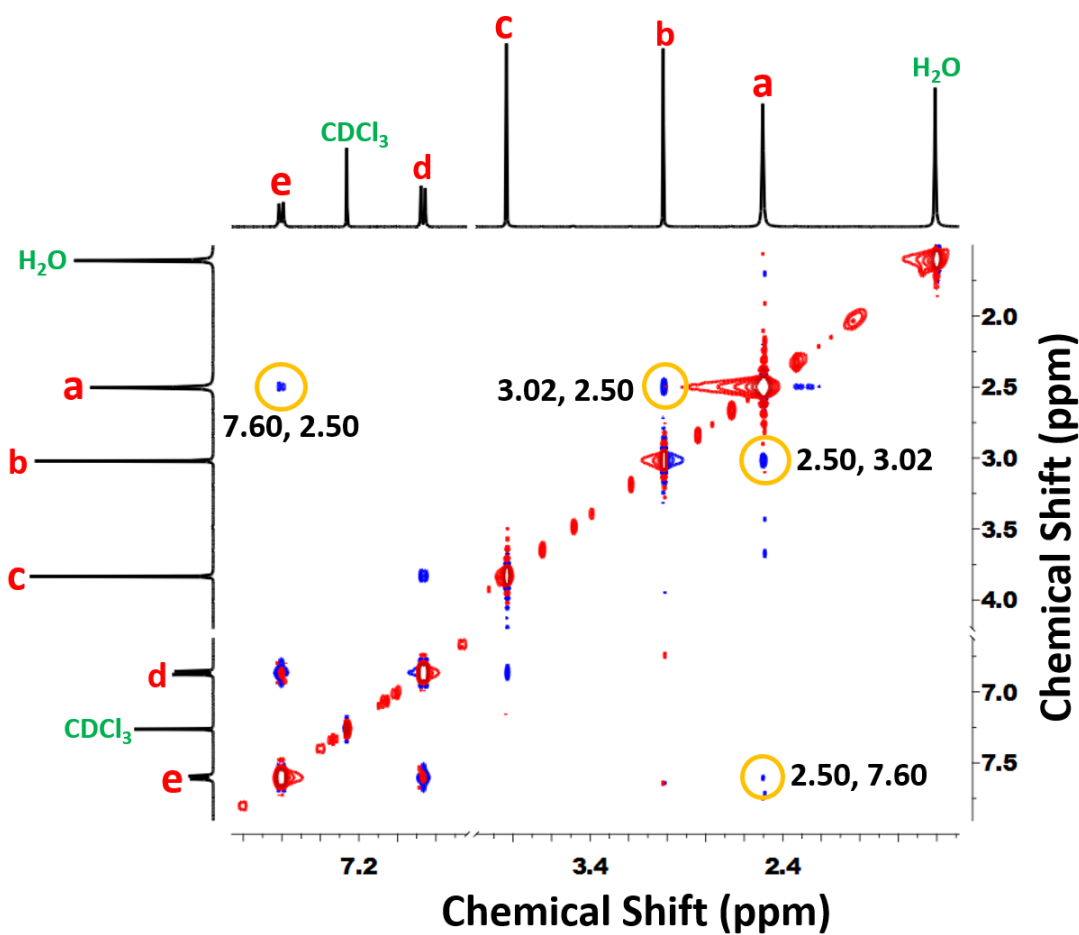

Figure S14 (B). 2D <sup>1</sup>H-<sup>1</sup>H NOESY Correlation enlarged spectra for 2 4-methoxy-*N,N,N'*-trimethylbenzohydrazide in CDCl<sub>3</sub>.

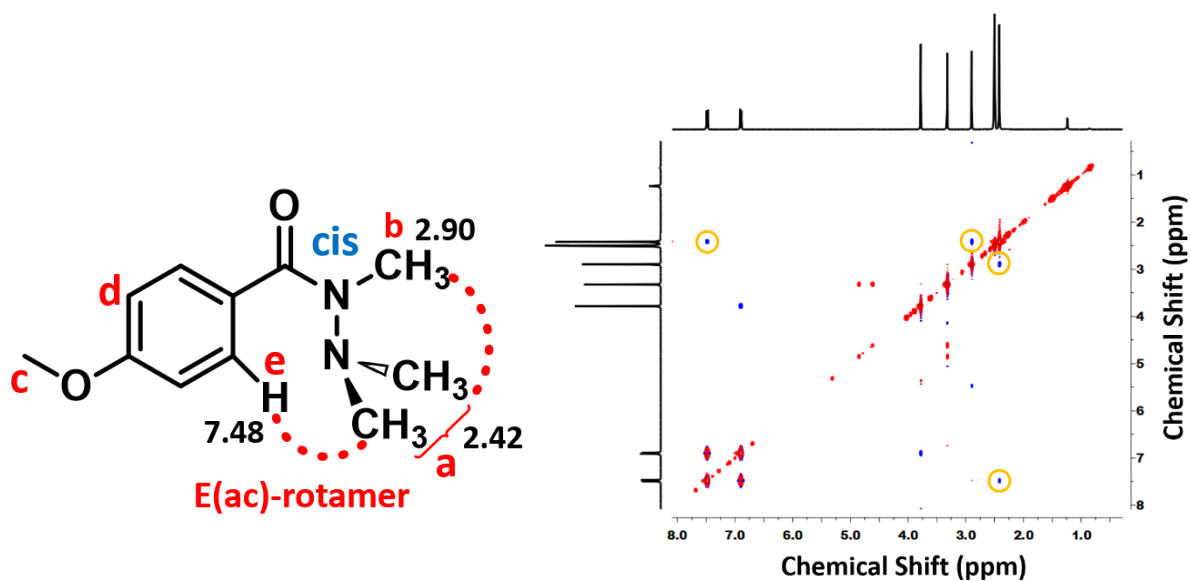

Compound 2

**Figure S15 (A).** 2D NOESY full spectra for 2 4-methoxy-*N, N', N'*-trimethylbenzohydrazide in  $[\text{CD}_3]_2\text{SO}$ .

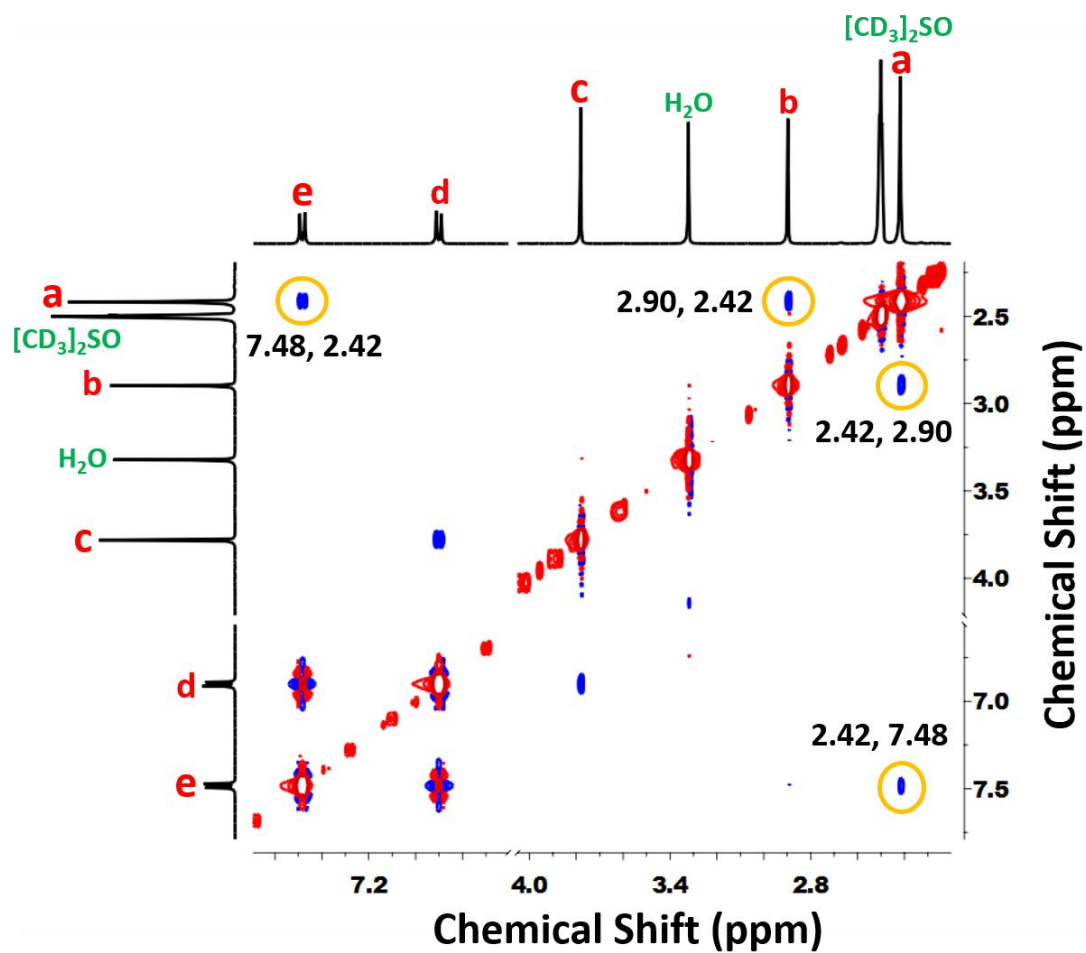

**Figure S15 (B).** 2D  $^1\text{H}$ - $^1\text{H}$  NOESY Correlation enlarged spectra for 2 4-methoxy-*N, N', N'*-trimethylbenzohydrazide in  $[\text{CD}_3]_2\text{SO}$ .

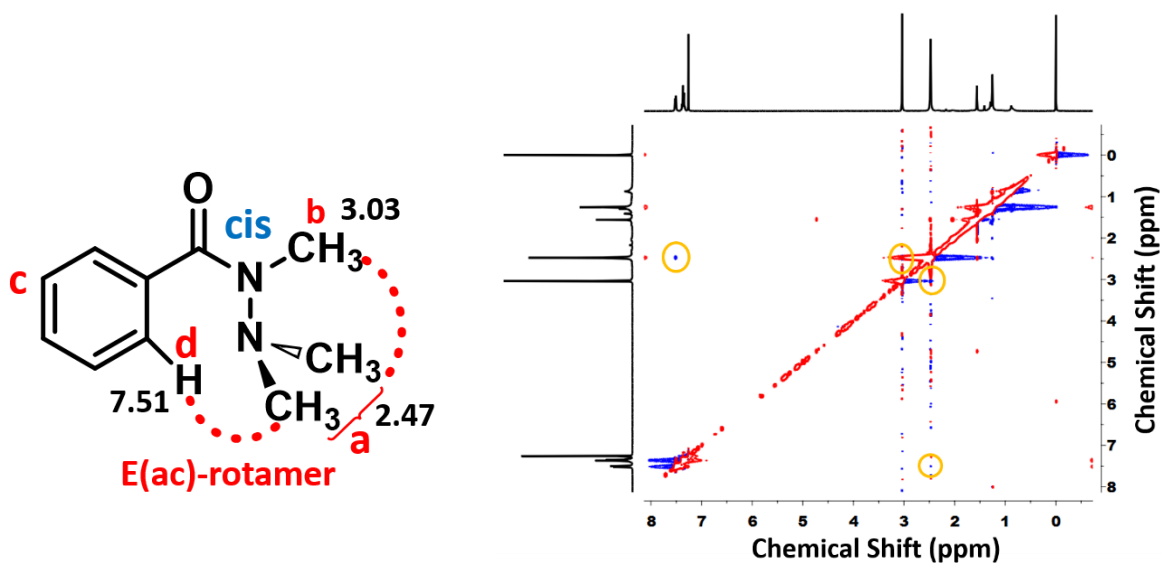

Compound 3

**Figure S16 (A).** 2D NOESY full spectra for 3 *N, N', N'*-trimethylbenzohydrazide in  $\text{CDCl}_3$ .

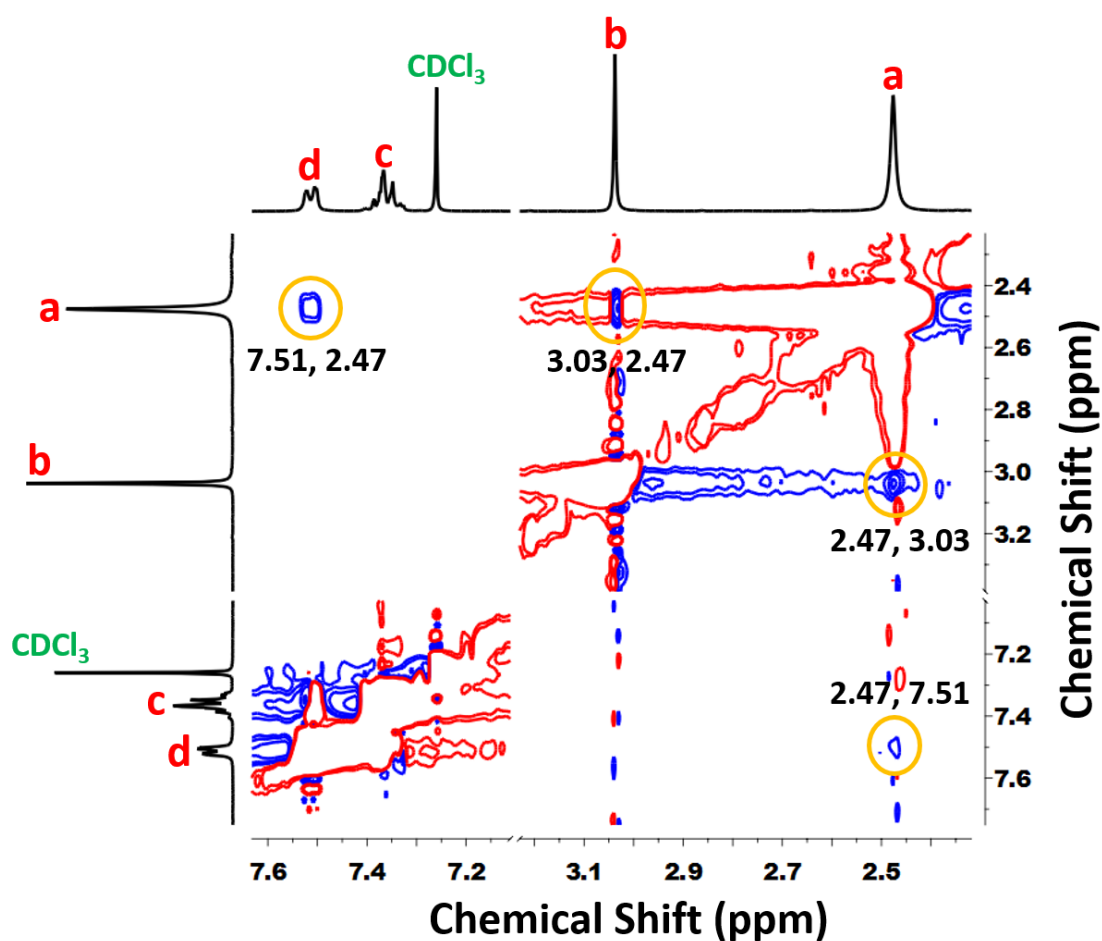

**Figure S16 (B).** 2D  $^1\text{H}$ - $^1\text{H}$  NOESY Correlation enlarged spectra for 3 *N, N', N'*-trimethylbenzohydrazide in  $\text{CDCl}_3$ .



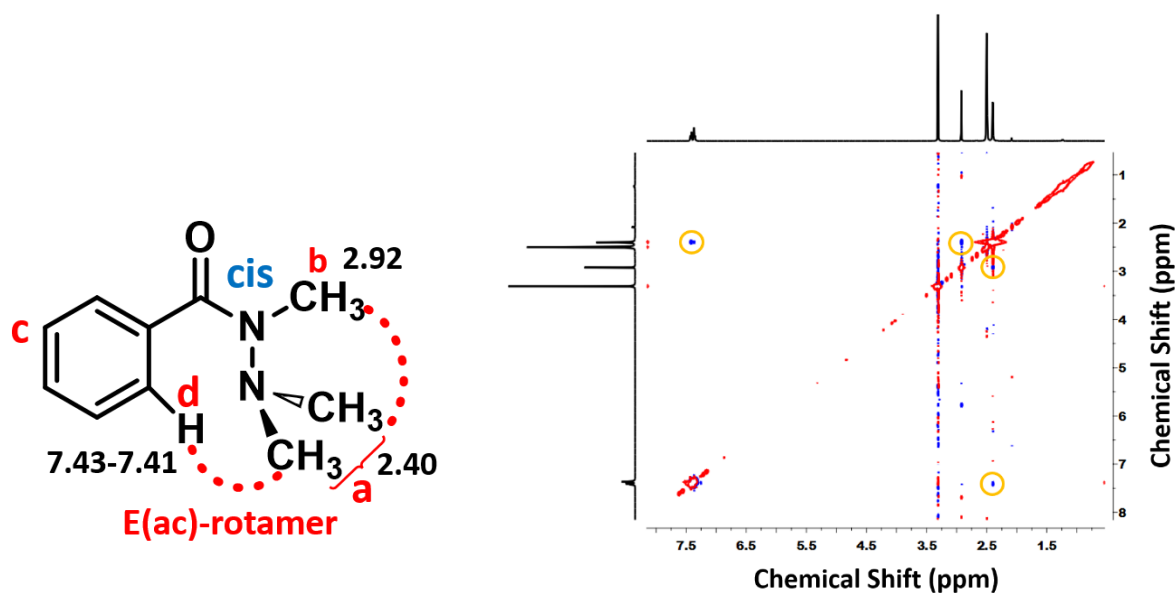

Compound 3

Figure S17 (A). 2D NOESY full spectra for 3 *N, N', N'*-trimethylbenzohydrazide in  $[\text{CD}_3]_2\text{SO}$ .

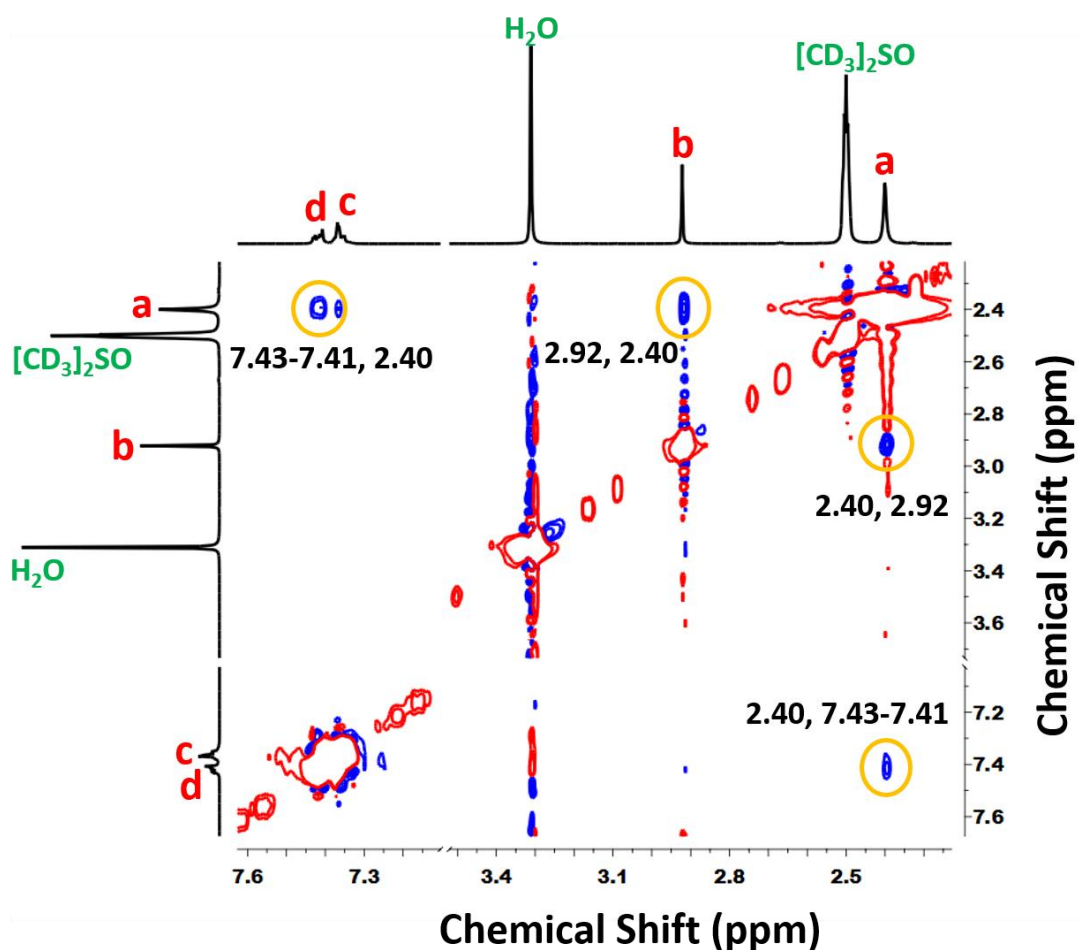

Figure S17 (B). 2D  $^1\text{H}$ - $^1\text{H}$  NOESY Correlation enlarged spectra for 3 *N, N', N'*-trimethylbenzohydrazide in  $[\text{CD}_3]_2\text{SO}$ .

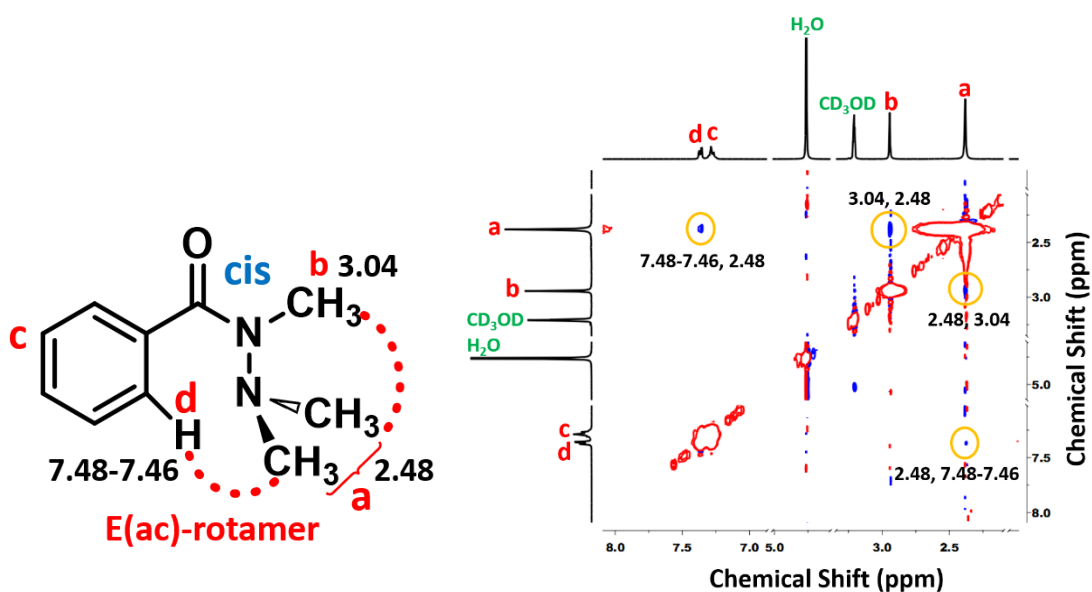

Compound 3

Figure S18 (A). 2D NOESY full spectra for 3 *N, N', N'*-trimethylbenzohydrazide in  $\text{CD}_3\text{OD}$ .

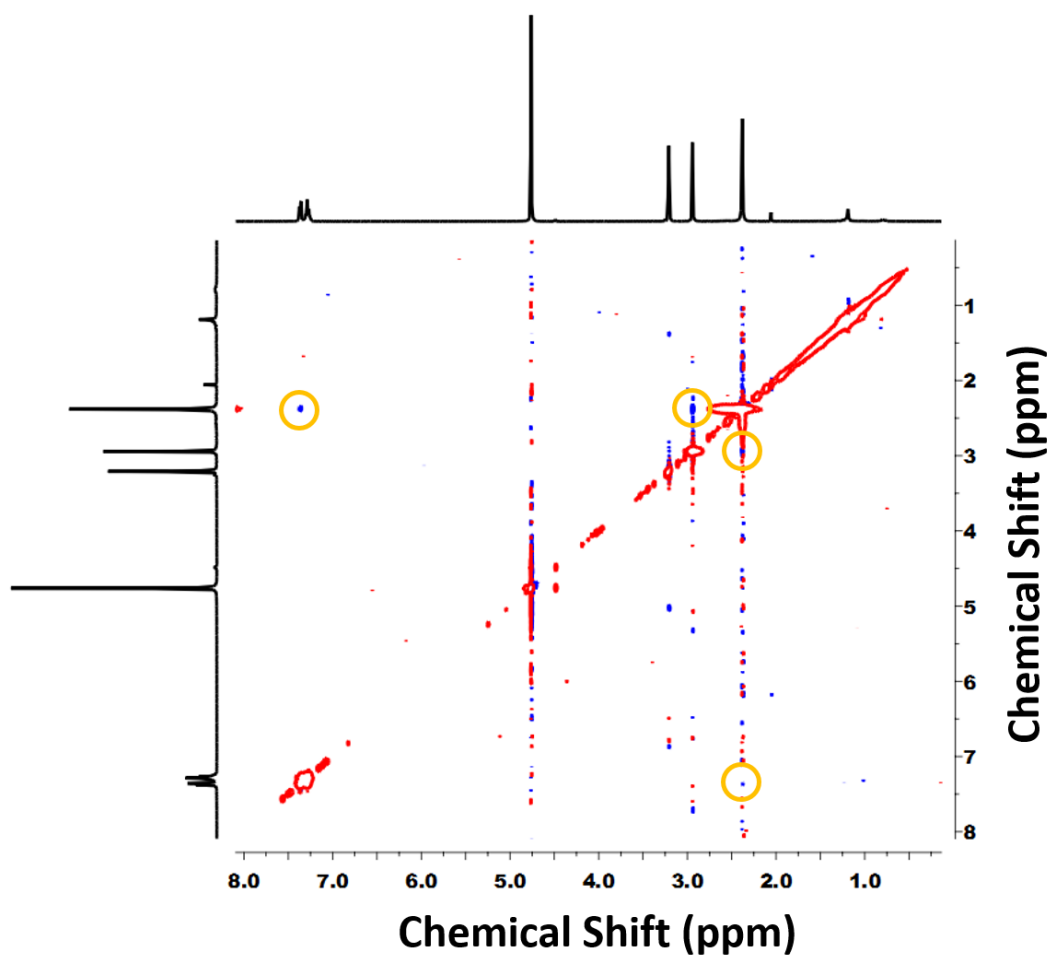

Figure S18 (B). 2D  $^1\text{H}$ - $^1\text{H}$  NOESY Correlation enlarged spectra for 3 *N, N', N'*-trimethylbenzohydrazide in  $\text{CD}_3\text{OD}$ .

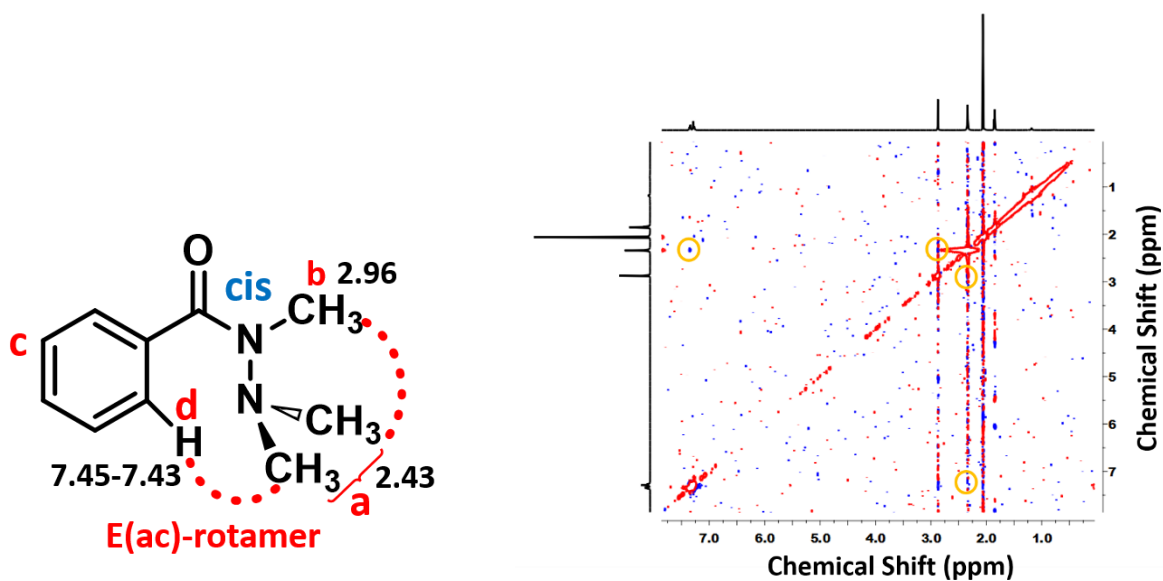

Compound 3

Figure S19 (A). 2D NOESY full spectra for 3 *N, N', N'*-trimethylbenzohydrazide in CD<sub>3</sub>CN.

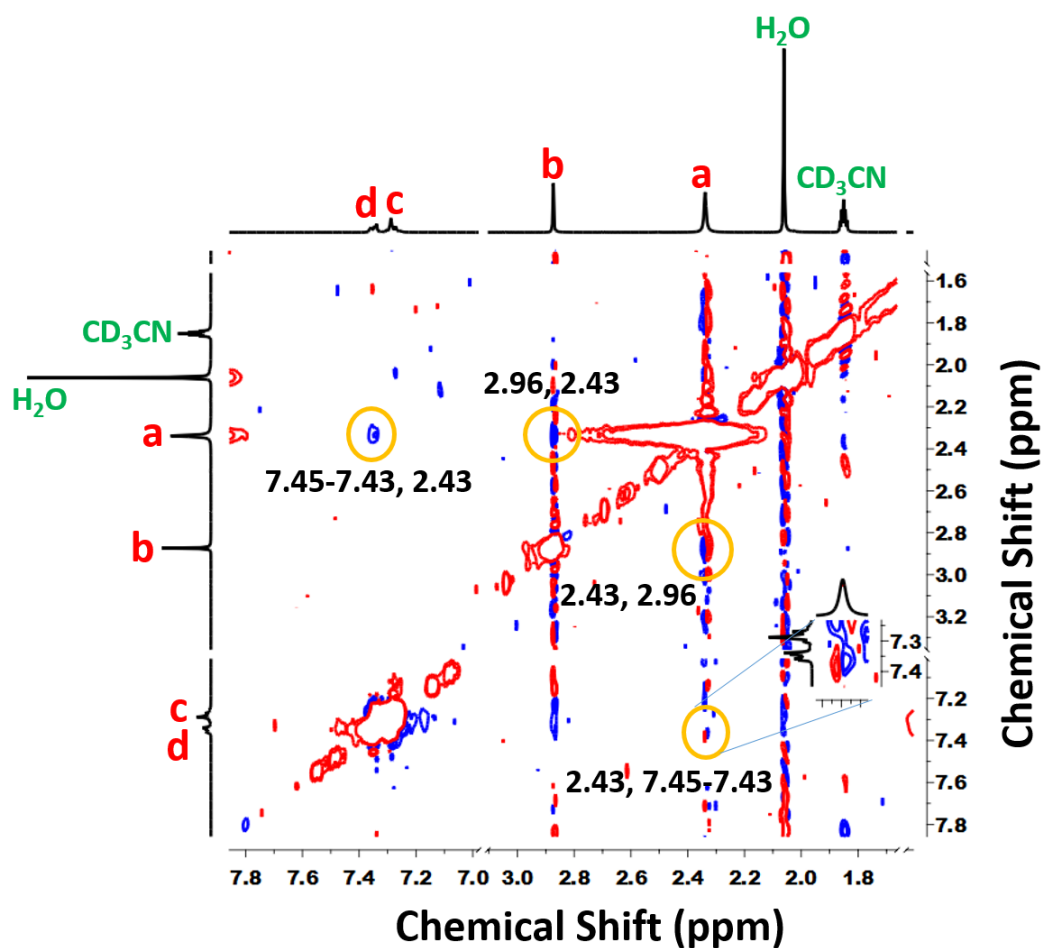

Figure S19 (B). 2D <sup>1</sup>H-<sup>1</sup>H NOESY Correlation enlarged spectra for 3 *N, N', N'*-trimethylbenzohydrazide in CD<sub>3</sub>CN.

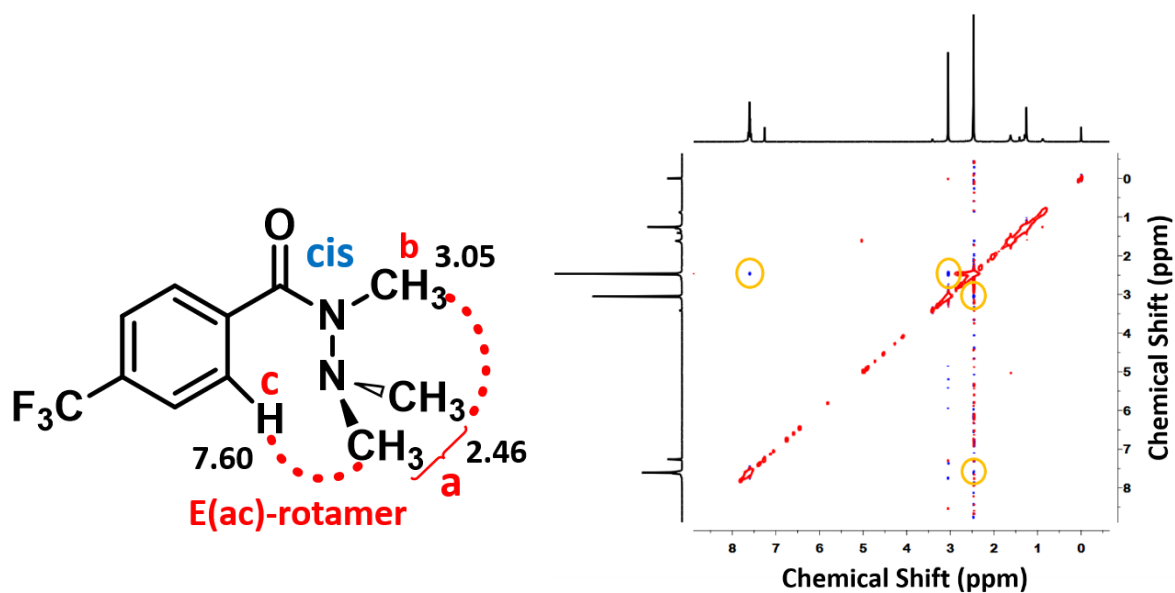

Compound 4

**Figure S20 (A).** 2D NOESY full spectra for **4** *N, N', N'*-trimethyl-4-(trifluoromethyl)benzohydrazide in CDCl<sub>3</sub>.

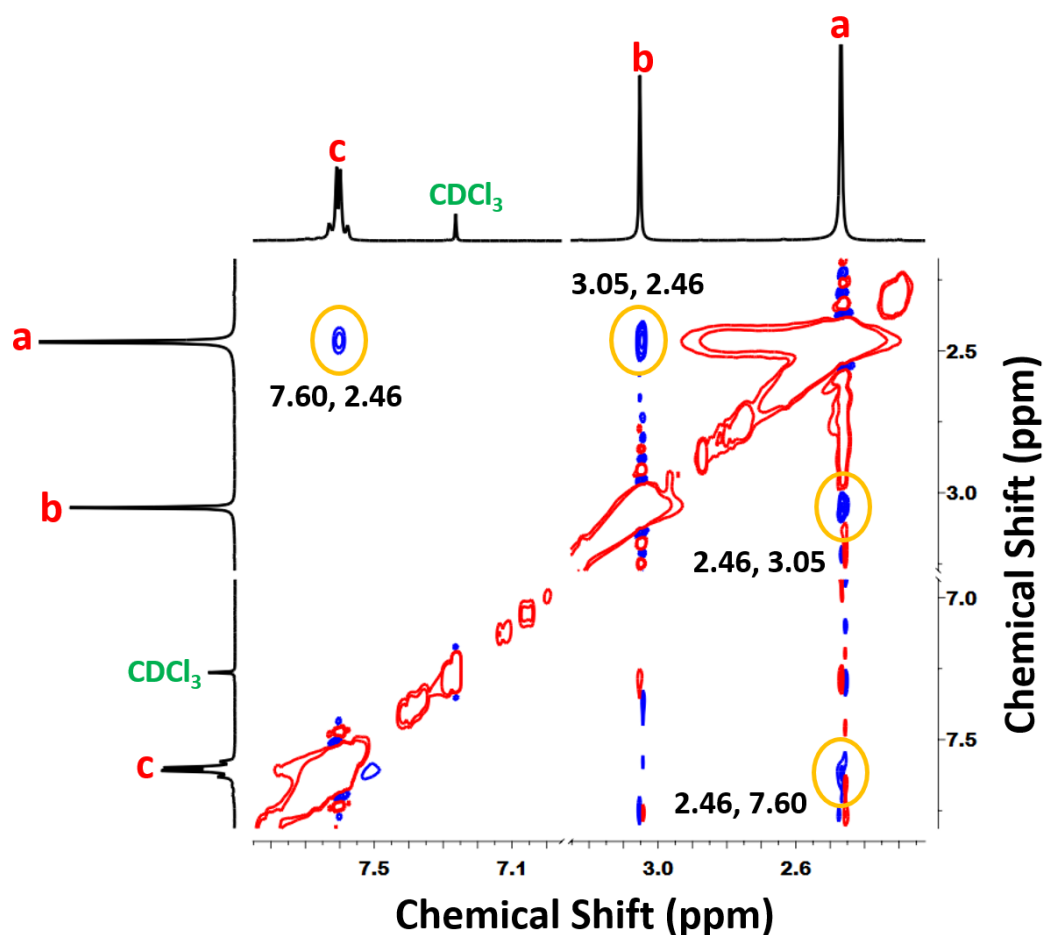

**Figure S20 (B).** 2D <sup>1</sup>H-<sup>1</sup>H NOESY Correlation enlarged spectra for **4** *N, N', N'*-trimethyl-4-(trifluoromethyl)benzohydrazide in CDCl<sub>3</sub>.

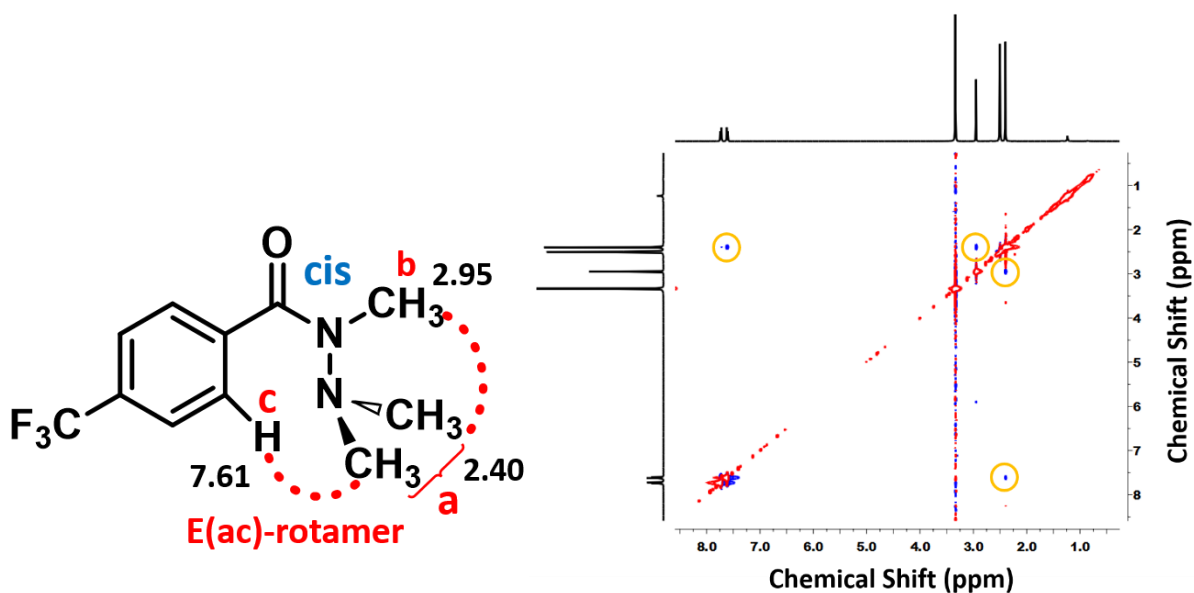

Compound 4

**Figure S21 (A).** 2D NOESY full spectra for **4** *N, N', N'*-trimethyl-4-(trifluoromethyl)benzohydrazide in  $[\text{CD}_3]_2\text{SO}$ .

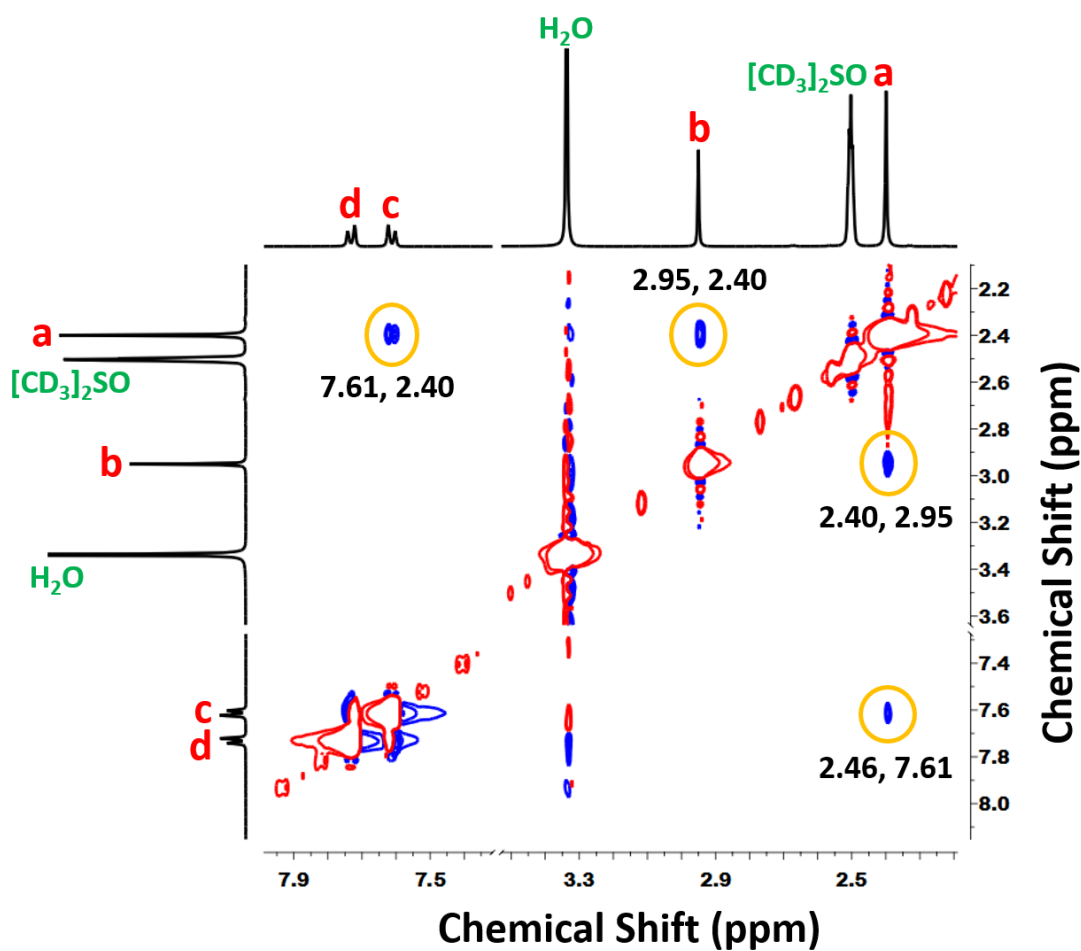

**Figure S21 (B).** 2D  $^1\text{H}$ - $^1\text{H}$  NOESY Correlation enlarged spectra for **4** *N, N', N'*-trimethyl-4-(trifluoromethyl)benzohydrazide in  $[\text{CD}_3]_2\text{SO}$ .

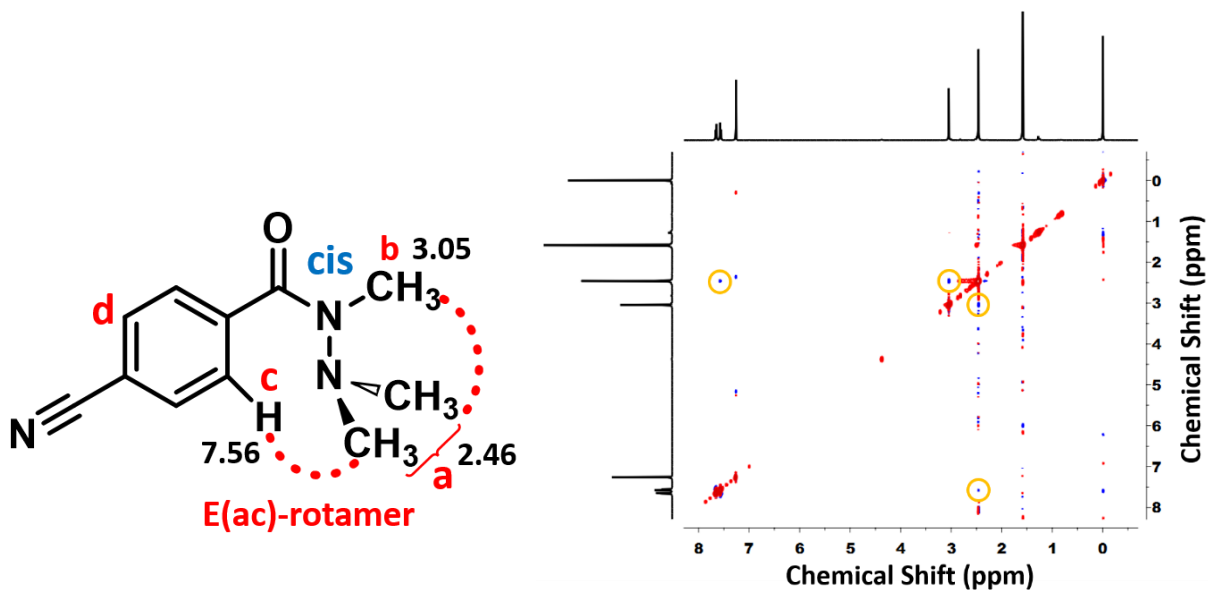

Compound 5

**Figure S22 (A).** 2D NOESY full spectra for **5** 4-cyano-*N, N', N'*-trimethylbenzohydrazide in  $\text{CDCl}_3$ .

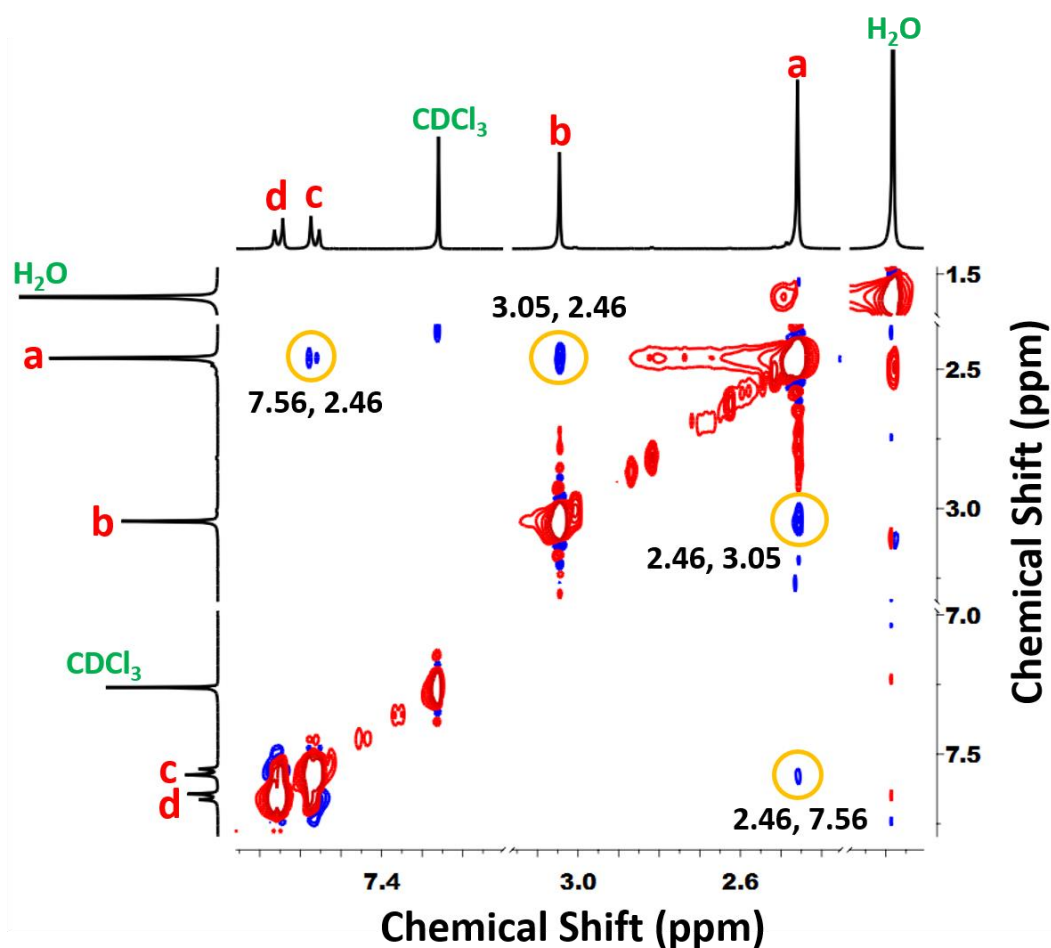

**Figure S22 (B).** 2D  $^1\text{H}$ - $^1\text{H}$  NOESY Correlation enlarged spectra for **5** 4-cyano-*N, N', N'*-trimethylbenzohydrazide in  $\text{CDCl}_3$ .

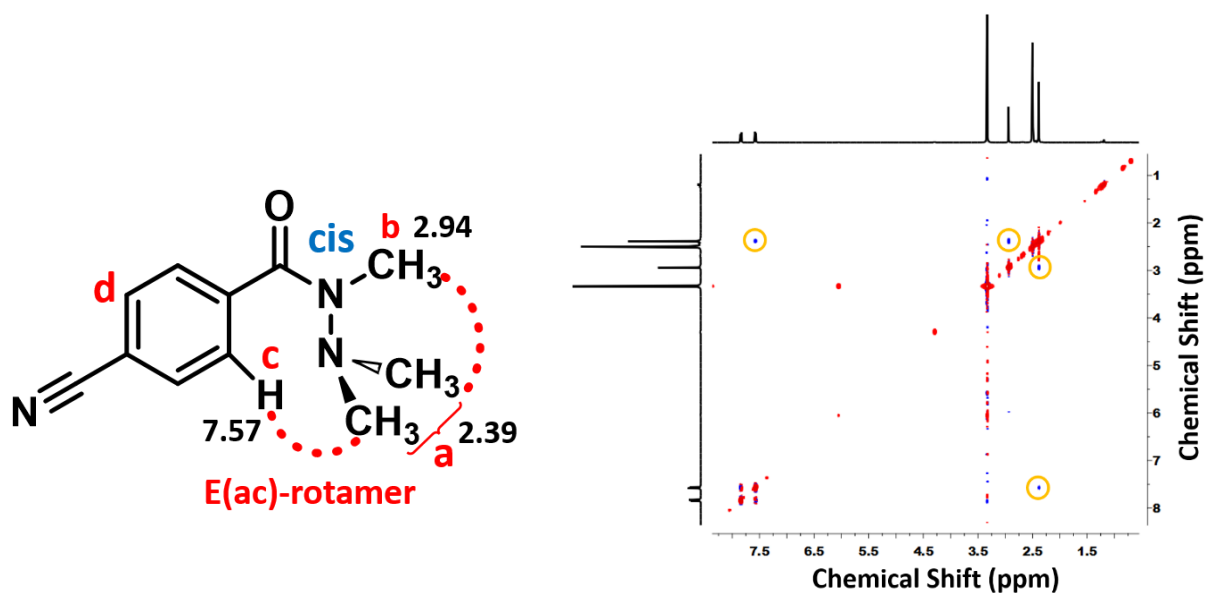

Compound 5

Figure S23 (A). 2D NOESY full spectra for **5** 4-cyano-*N, N', N'*-trimethylbenzohydrazide in  $[\text{CD}_3]_2\text{SO}$ .

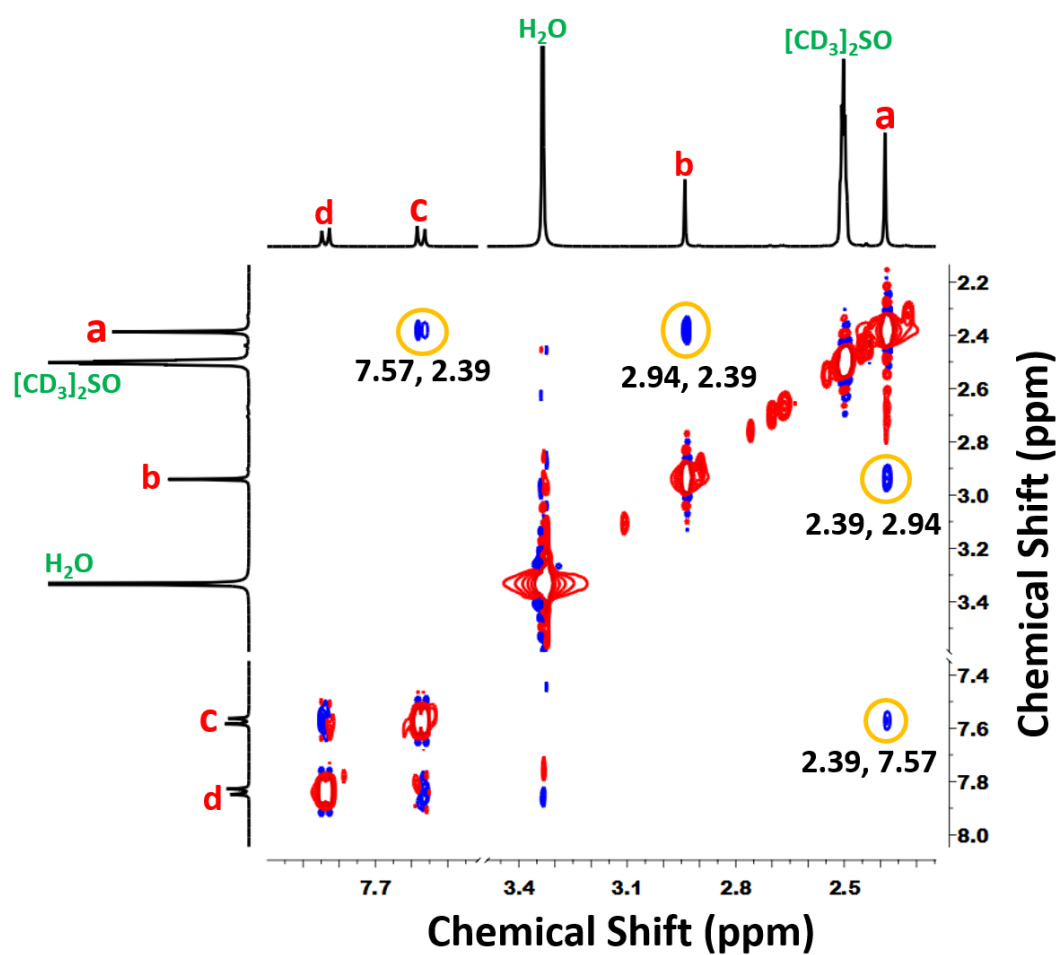

Figure S23 (B). 2D  $^1\text{H}$ - $^1\text{H}$  NOESY Correlation enlarged spectra for **5** 4-cyano-*N, N', N'*-trimethylbenzohydrazide in  $[\text{CD}_3]_2\text{SO}$ .

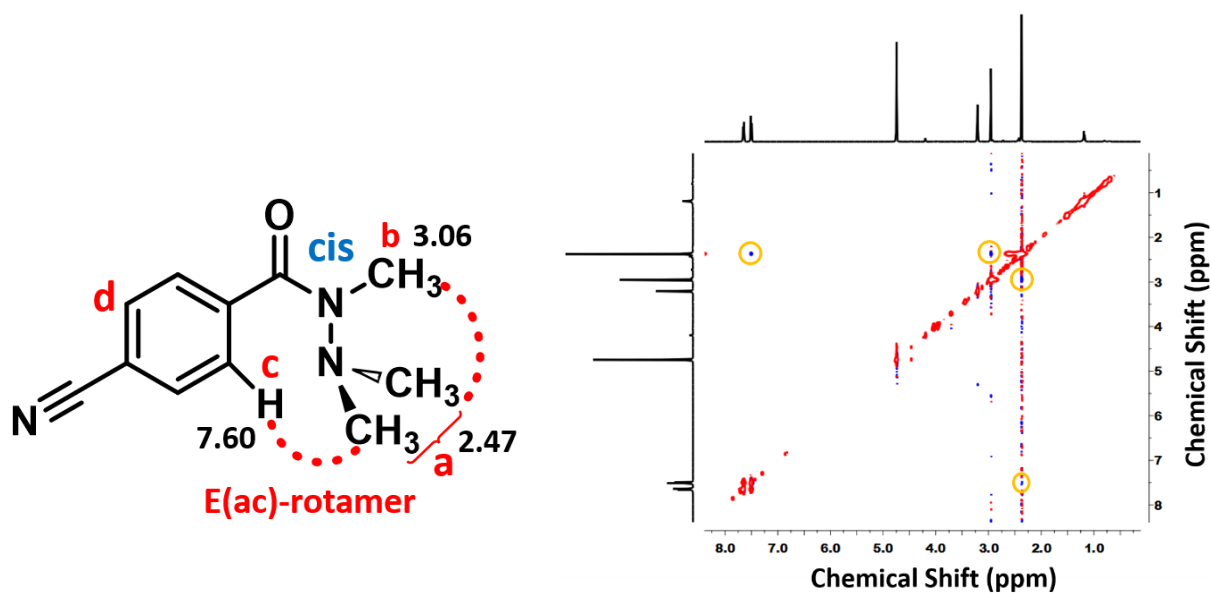

Compound 5

Figure S24 (A). 2D NOESY full spectra for **5** 4-cyano-*N,N,N'*-trimethylbenzohydrazide in CD<sub>3</sub>OD.

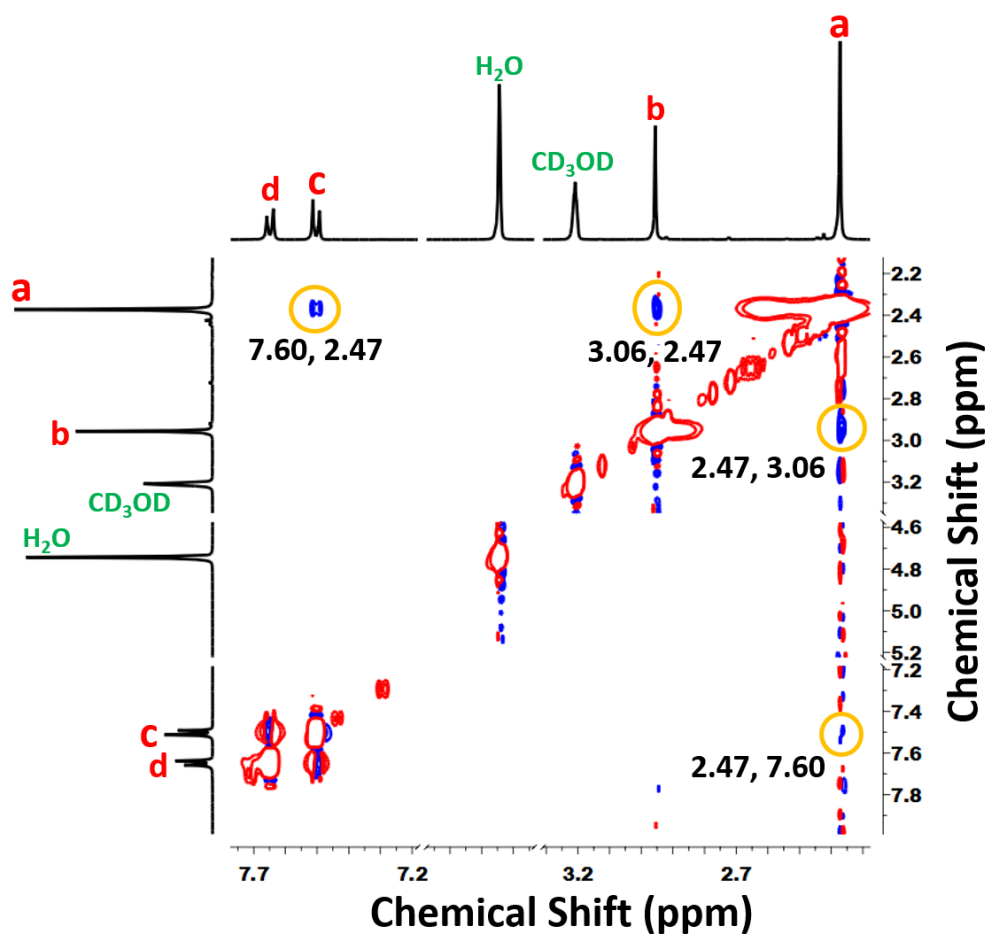

Figure S24 (B). 2D <sup>1</sup>H-<sup>1</sup>H NOESY Correlation enlarged spectra for **5** 4-cyano-*N,N,N'*-trimethylbenzohydrazide in CD<sub>3</sub>OD.



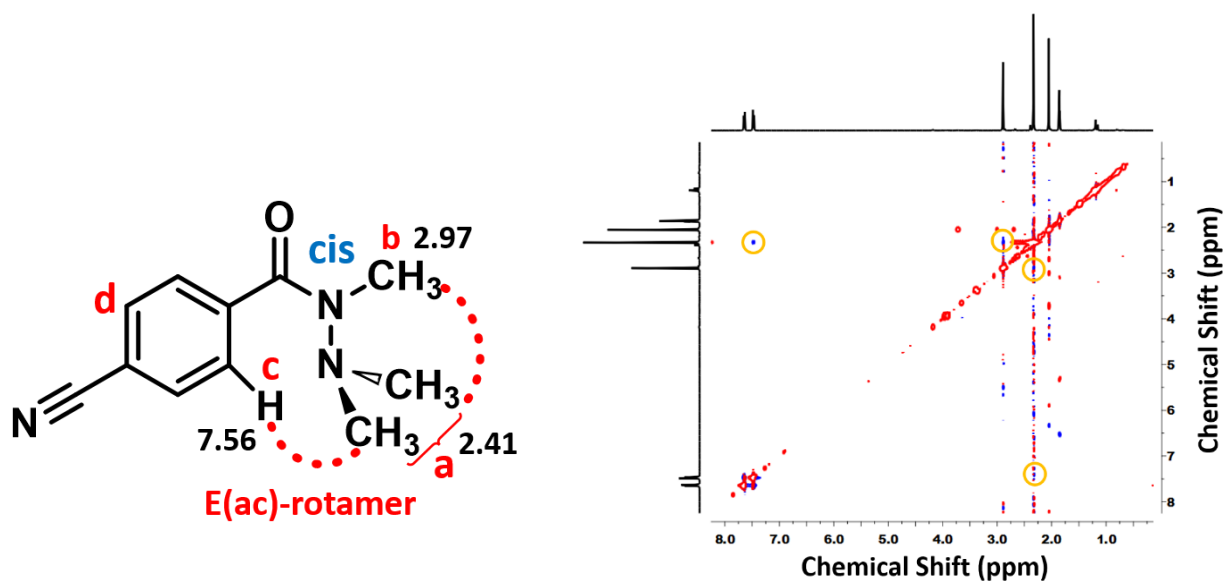

Compound 5

Figure S25 (A). 2D NOESY full spectra for **5** 4-cyano-*N, N', N'*-trimethylbenzohydrazide in CD<sub>3</sub>CN.

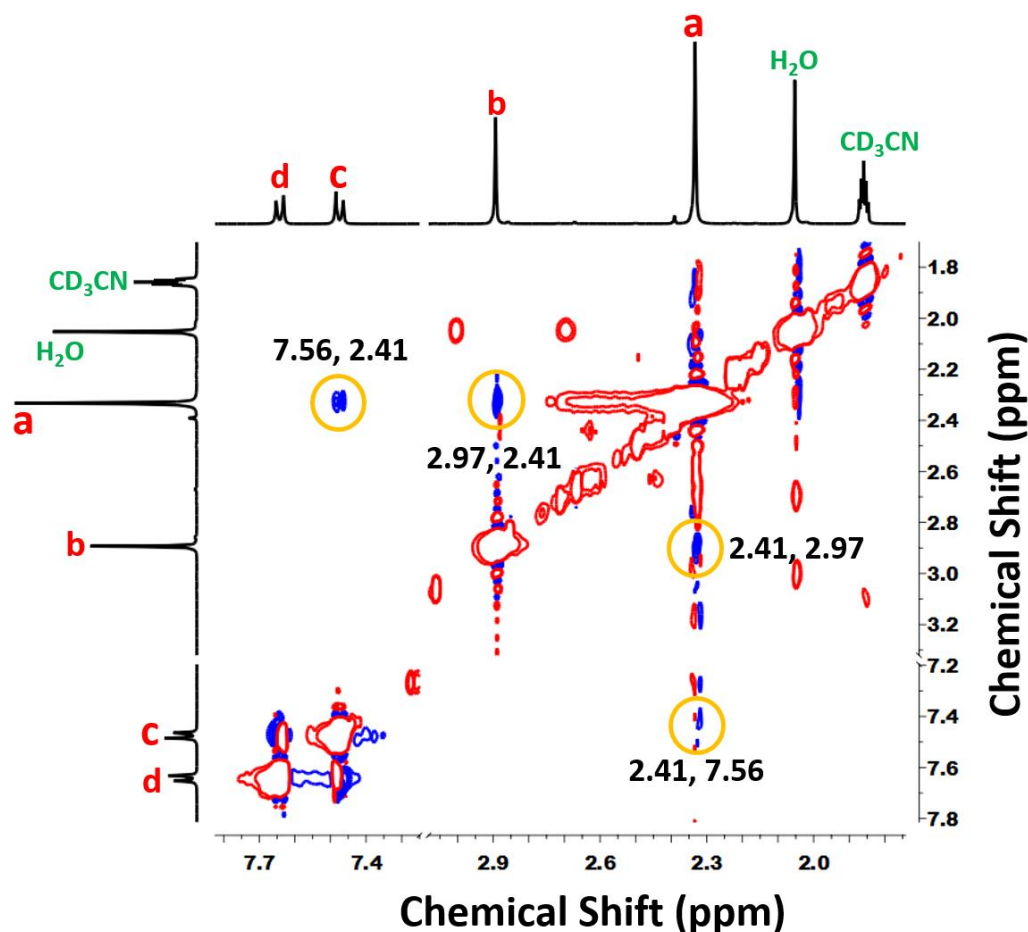

Figure S25 (B). 2D <sup>1</sup>H-<sup>1</sup>H NOESY Correlation enlarged spectra for **5** 4-cyano-*N, N', N'*-trimethylbenzohydrazide in CD<sub>3</sub>CN.

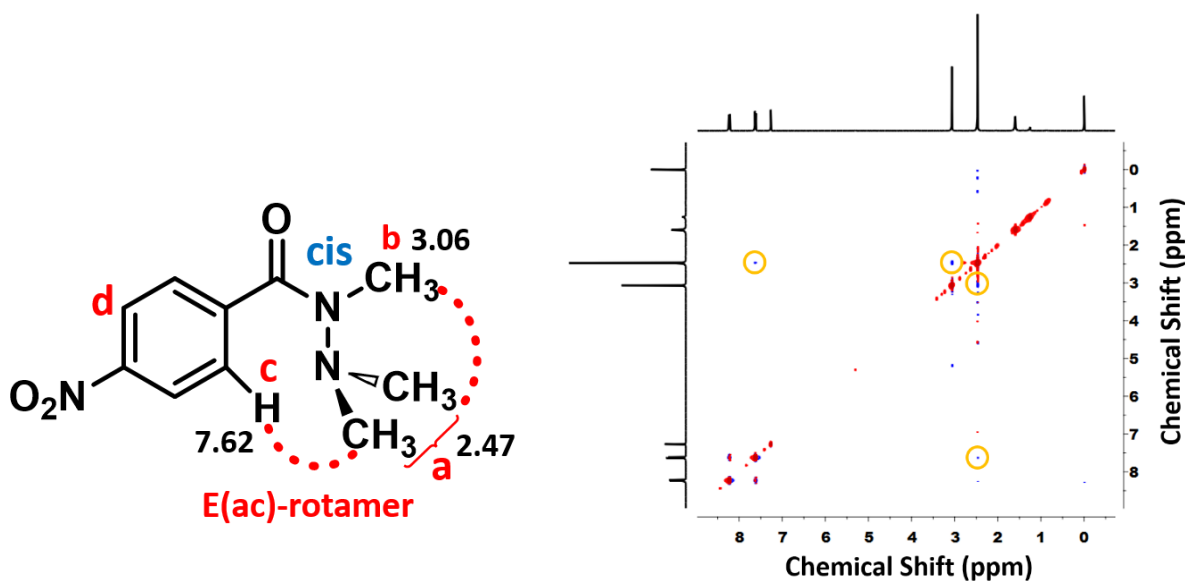

Compound **6**

**Figure S26 (A).** 2D NOESY full spectra for **6** *N, N', N'*-trimethyl-4-nitrobenzohydrazide in CDCl<sub>3</sub>.

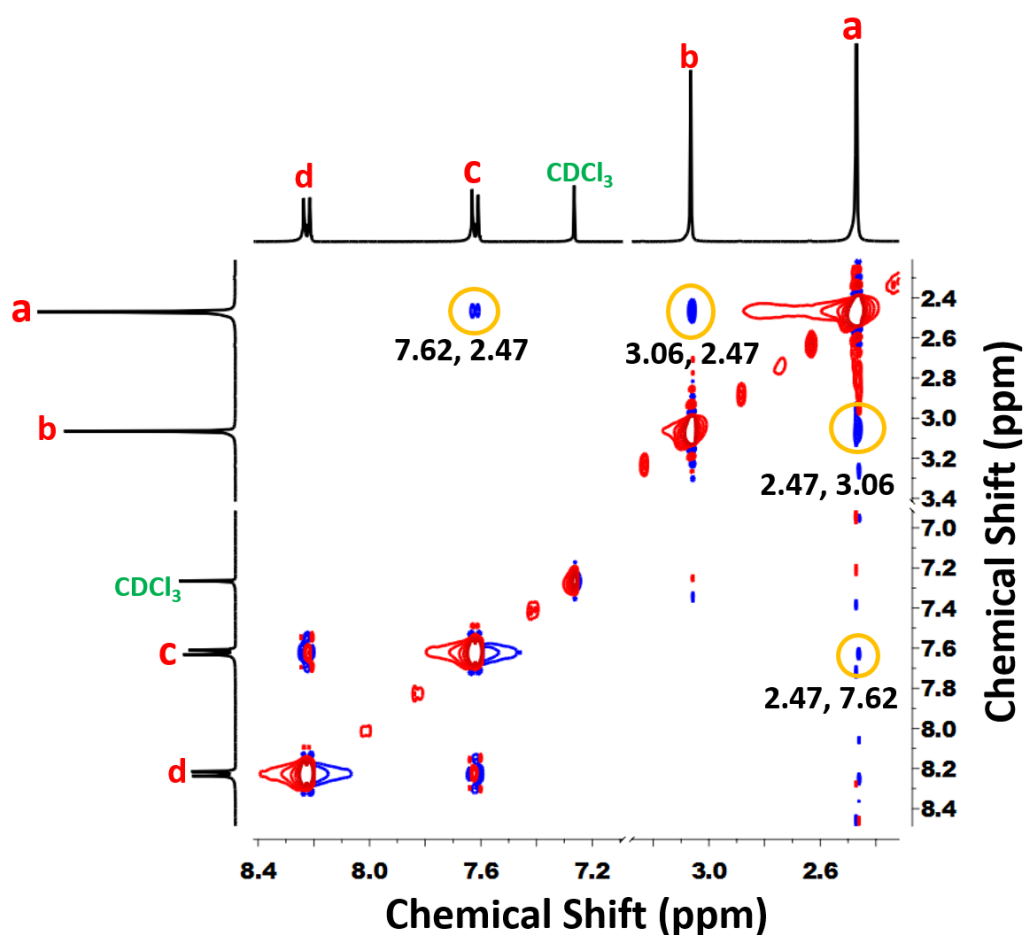

**Figure S26 (B).** 2D <sup>1</sup>H-<sup>1</sup>H NOESY Correlation enlarged spectra for **6** *N, N', N'*-trimethyl-4-nitrobenzohydrazide in CDCl<sub>3</sub>.

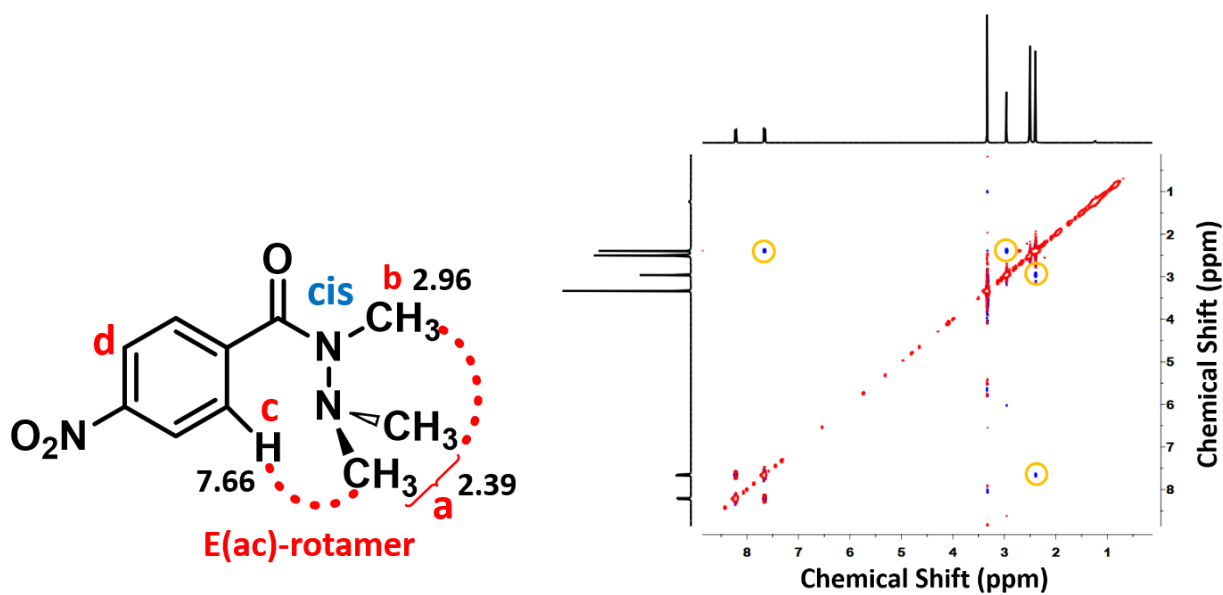

Compound 6

Figure S27 (A). 2D NOESY full spectra for 6 *N,N',N'*-trimethyl-4-nitrobenzohydrazide in  $[\text{CD}_3]_2\text{SO}$ .

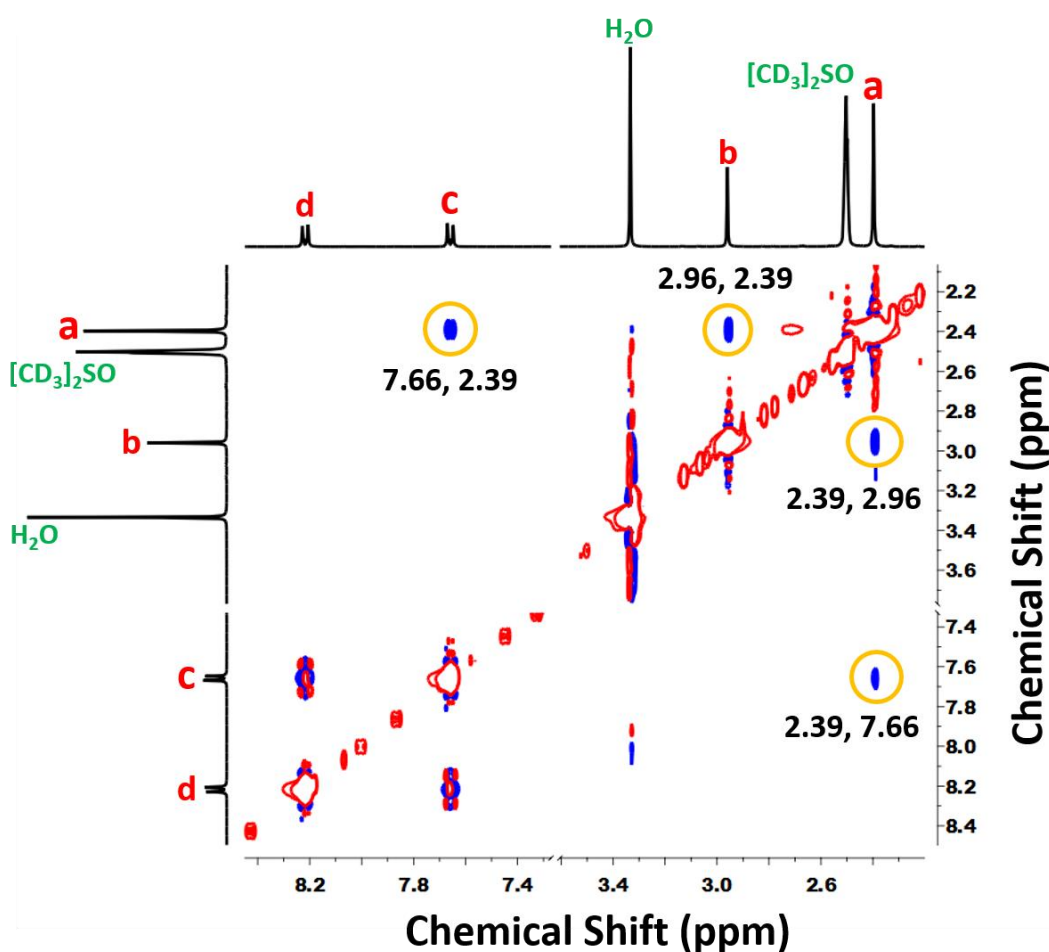

Figure S27 (B). 2D  $^1\text{H}$ - $^1\text{H}$  NOESY Correlation enlarged spectra for 6 *N,N',N'*-trimethyl-4-nitrobenzohydrazide in  $[\text{CD}_3]_2\text{SO}$ .

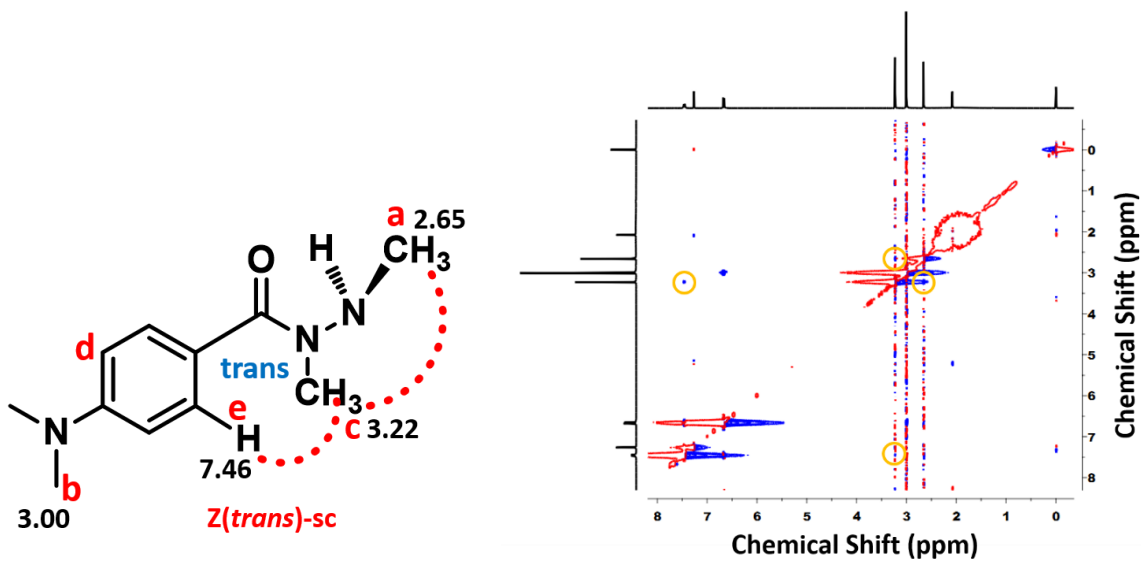

Compound 7

**Figure S28 (A).** 2D NOESY full spectra for **7** 4-(dimethylamino)-*N,N'*-dimethylbenzohydrazide in CDCl<sub>3</sub>.

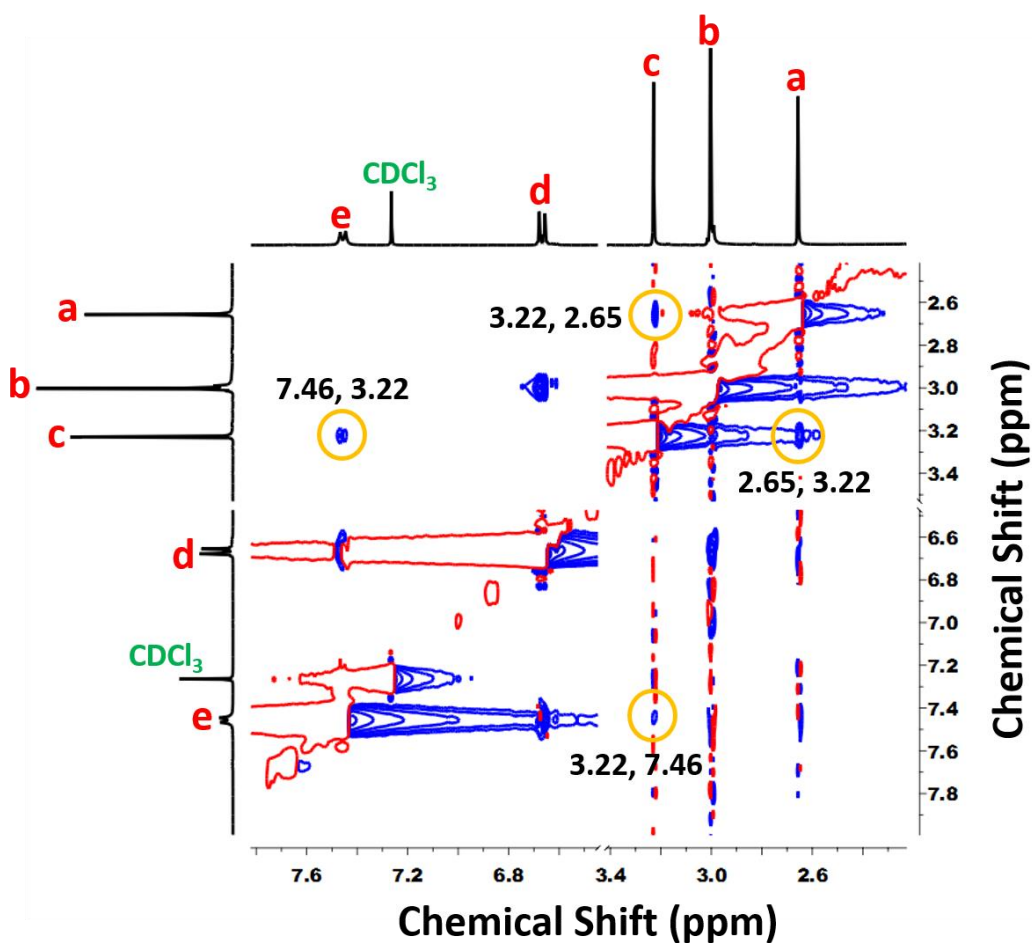

**Figure S28 (B).** 2D <sup>1</sup>H-<sup>1</sup>H NOESY Correlation enlarged spectra for **7** 4-(dimethylamino)-*N,N'*-dimethylbenzohydrazide in CDCl<sub>3</sub>.

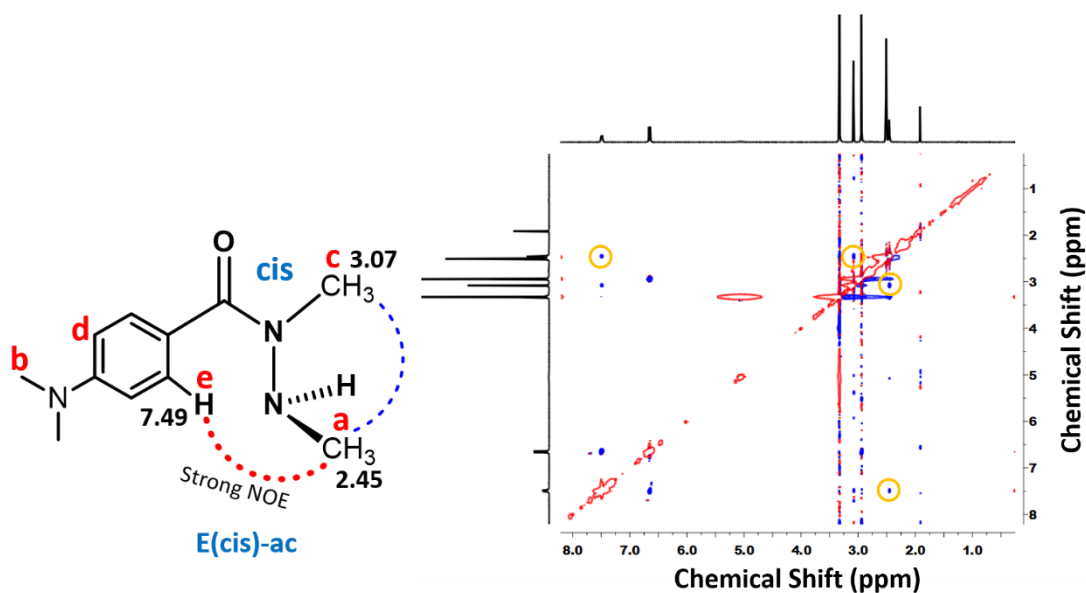

Compound 7

**Figure S29 (A).** 2D NOESY full spectra for **7** 4-(dimethylamino)-*N,N'*-dimethylbenzohydrazide in  $[\text{CD}_3]_2\text{SO}$ .

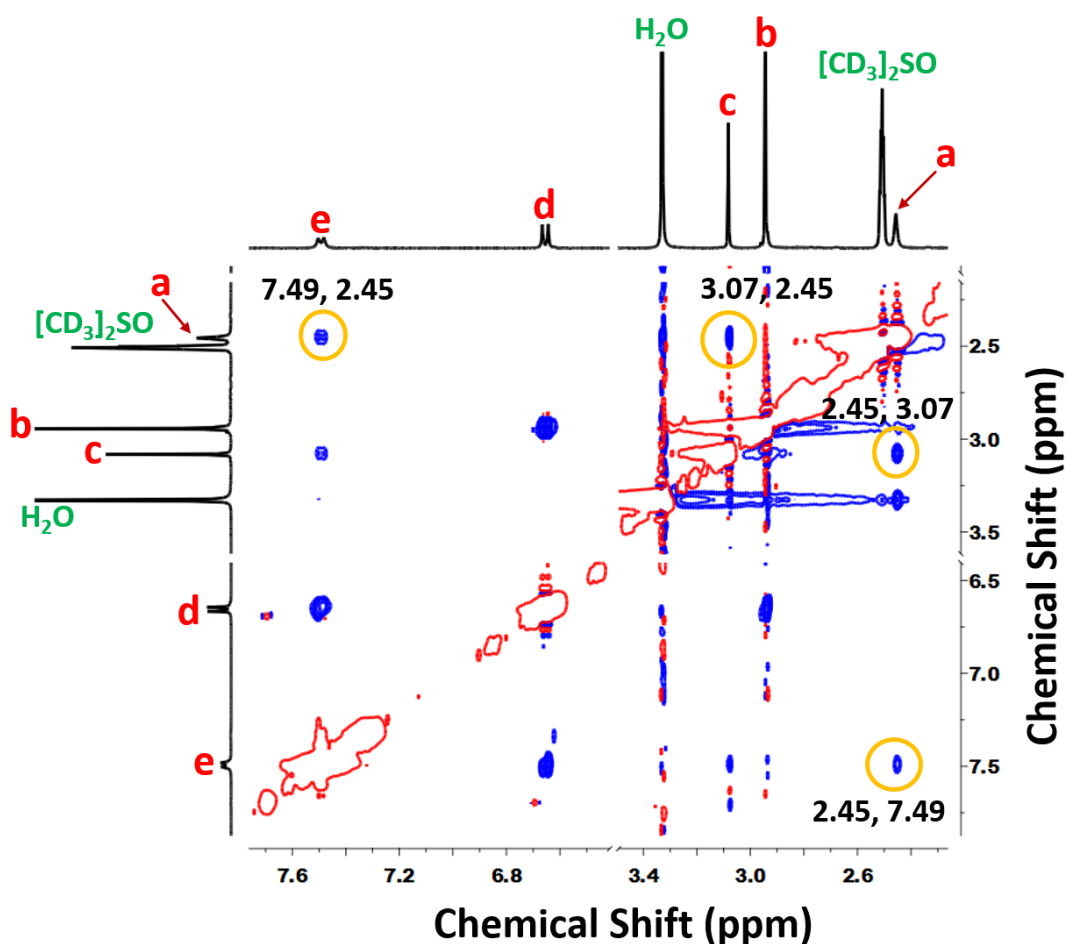

**Figure S29 (B).** 2D  $^1\text{H}$ - $^1\text{H}$  NOESY Correlation enlarged spectra for **7** 4-(dimethylamino)-*N,N'*-dimethylbenzohydrazide in  $[\text{CD}_3]_2\text{SO}$ .

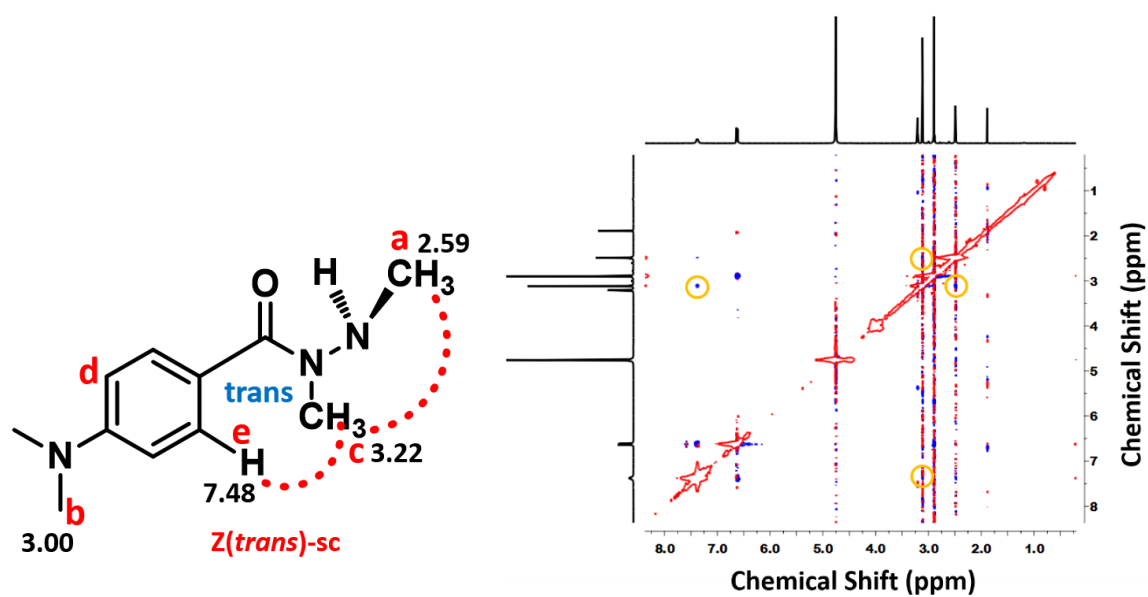

Compound 7

**Figure S30 (A).** 2D NOESY full spectra for **7** 4-(dimethylamino)-*N, N'*-dimethylbenzohydrazide in CD<sub>3</sub>OD.

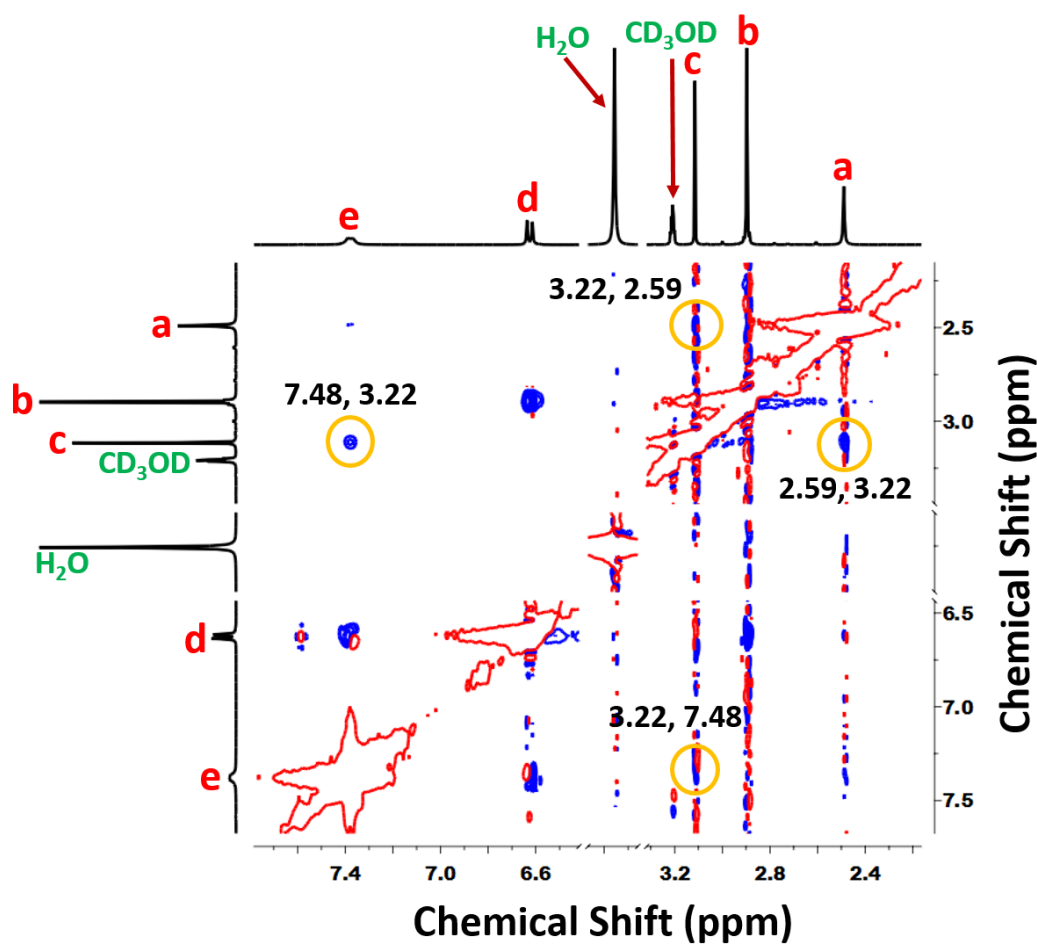

**Figure S30 (B).** 2D <sup>1</sup>H-<sup>1</sup>H NOESY Correlation enlarged spectra for **7** 4-(dimethylamino)-*N, N'*-dimethylbenzohydrazide in CD<sub>3</sub>OD.

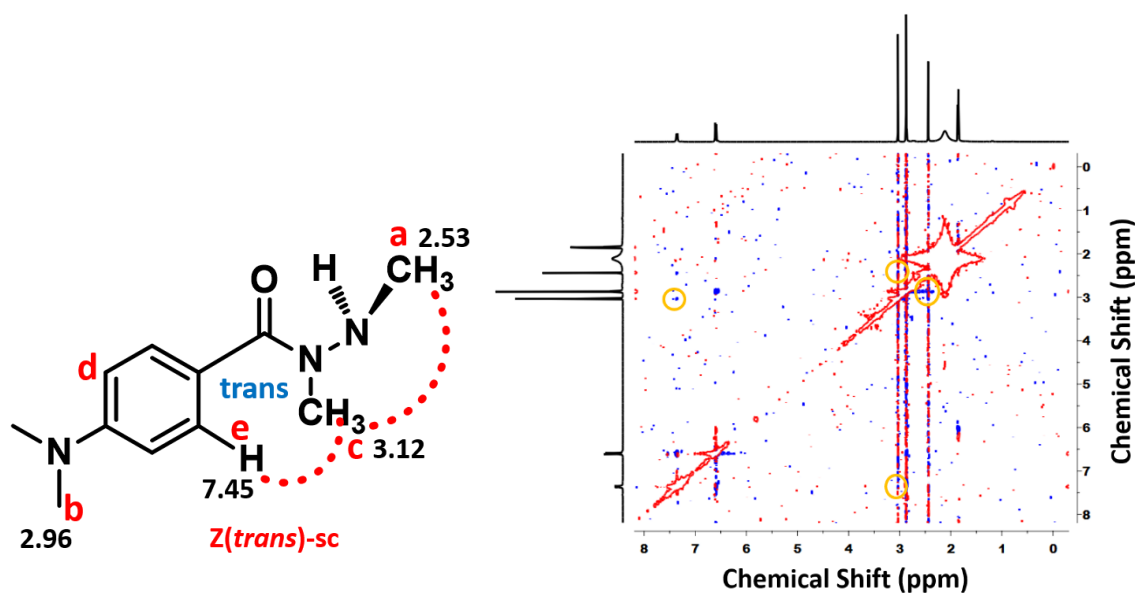

Compound 7

**Figure S31 (A).** 2D NOESY full spectra for **7** 4-(dimethylamino)-*N, N'*-dimethylbenzohydrazide in  $\text{CD}_3\text{CN}$ .

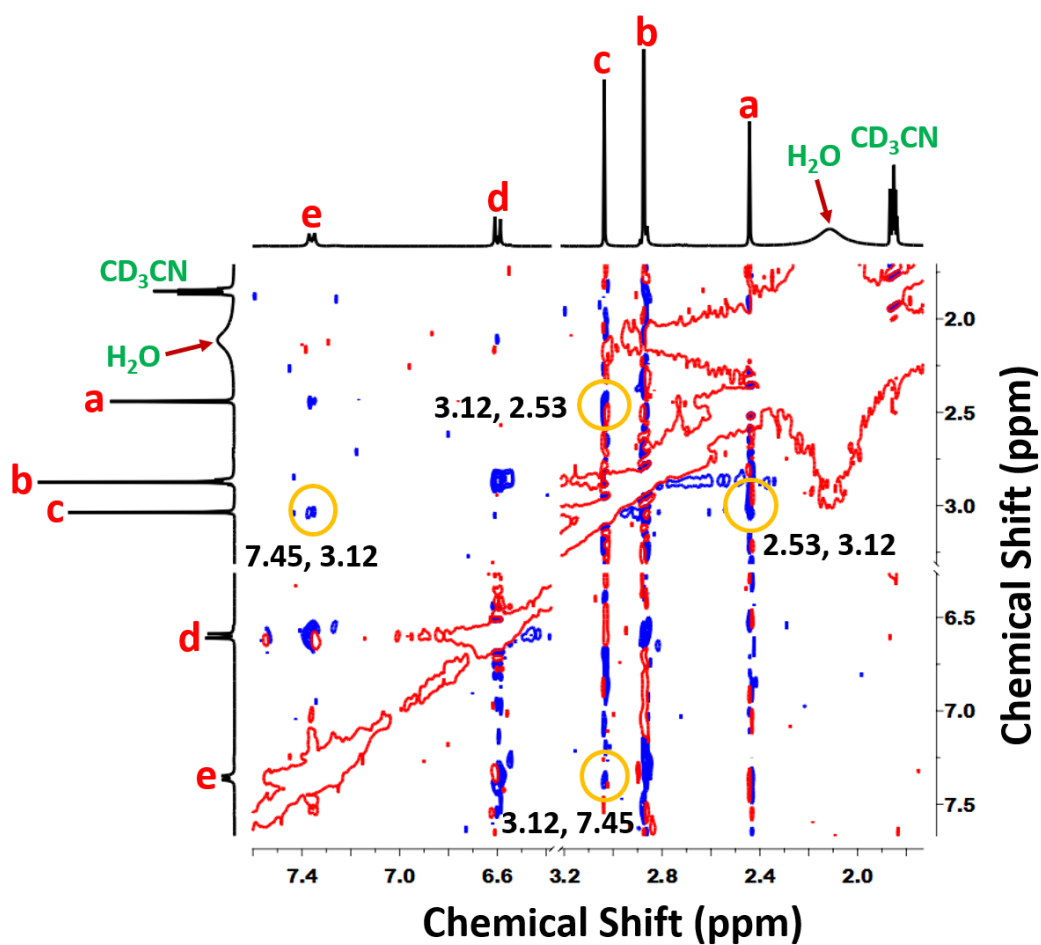

**Figure S31 (B).** 2D  $^1\text{H}$ - $^1\text{H}$  NOESY Correlation enlarged spectra for **7** 4-(dimethylamino)-*N, N'*-dimethylbenzohydrazide in  $\text{CD}_3\text{CN}$ .

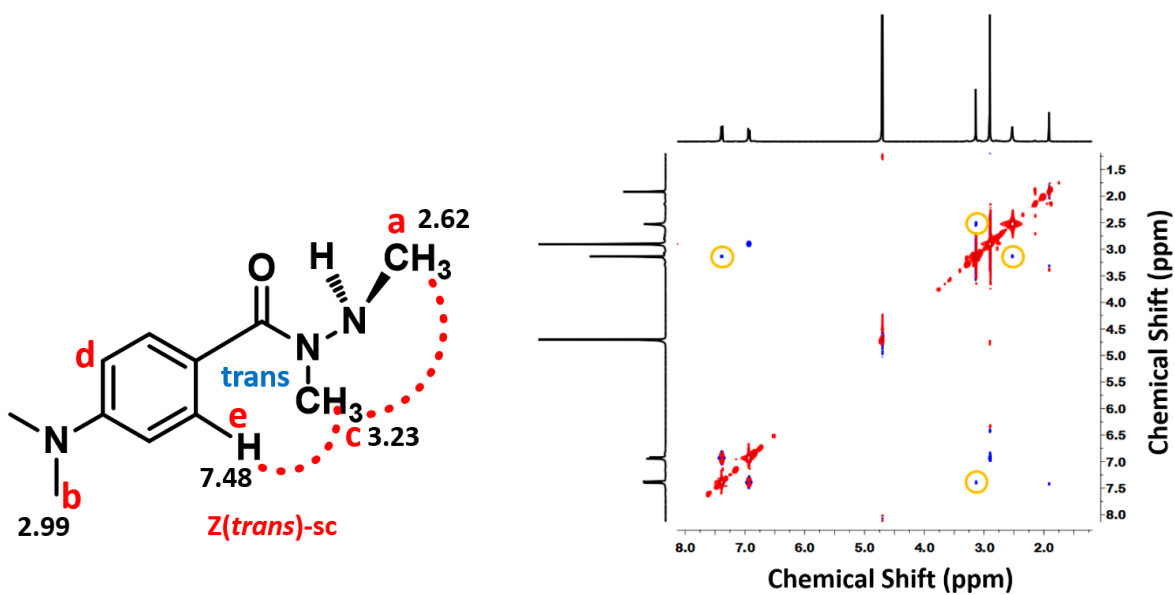

Compound 7

Figure S32 (A). 2D NOESY full spectra for 7 4-(dimethylamino)-*N, N'*-dimethylbenzohydrazide in D<sub>2</sub>O.

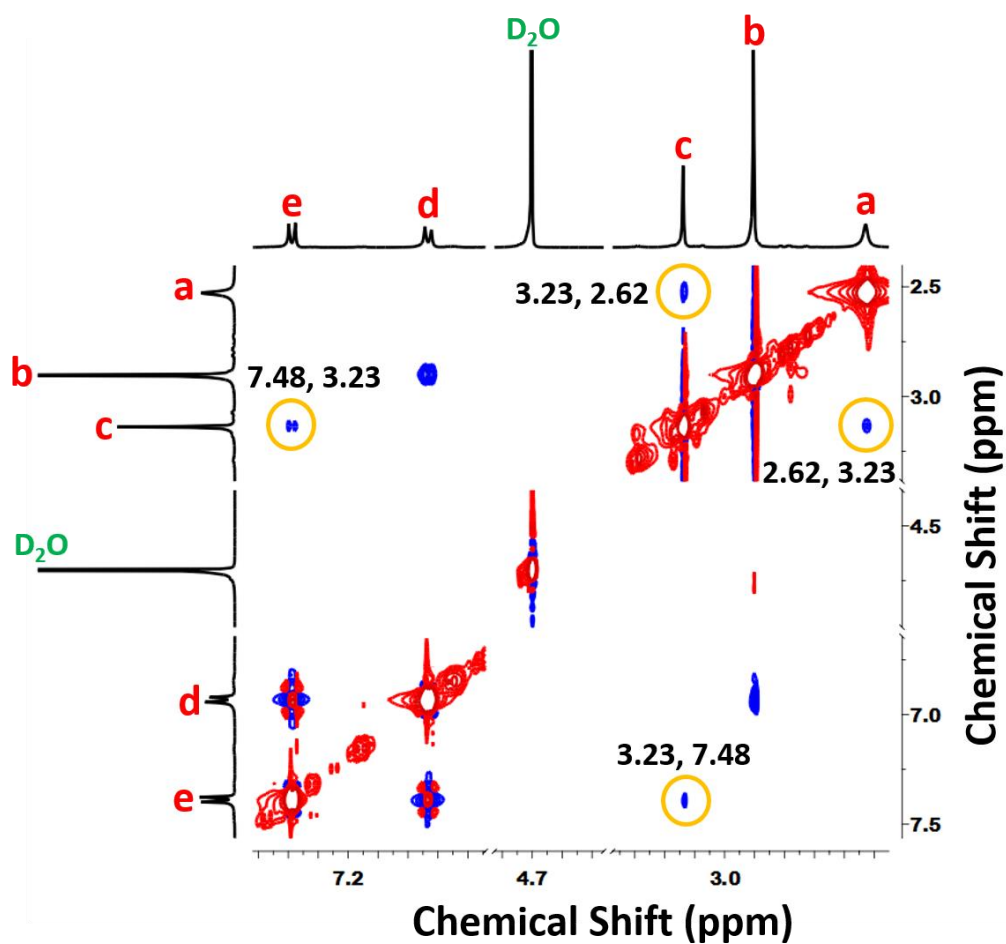

Figure S32 (B). 2D <sup>1</sup>H-<sup>1</sup>H NOESY Correlation enlarged spectra for 7 4-(dimethylamino)-*N, N'*-dimethylbenzohydrazide in D<sub>2</sub>O.



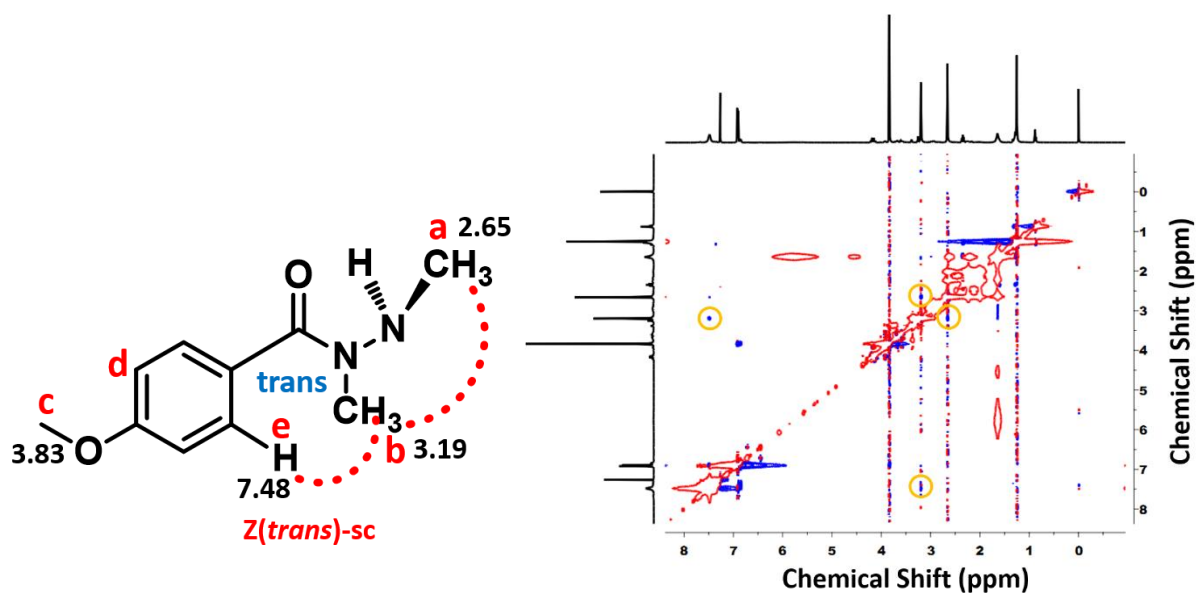

Compound 8

Figure S33 (A). 2D NOESY full spectra for 8 4-methoxy-*N,N'*-dimethylbenzohydrazide in CDCl<sub>3</sub>.

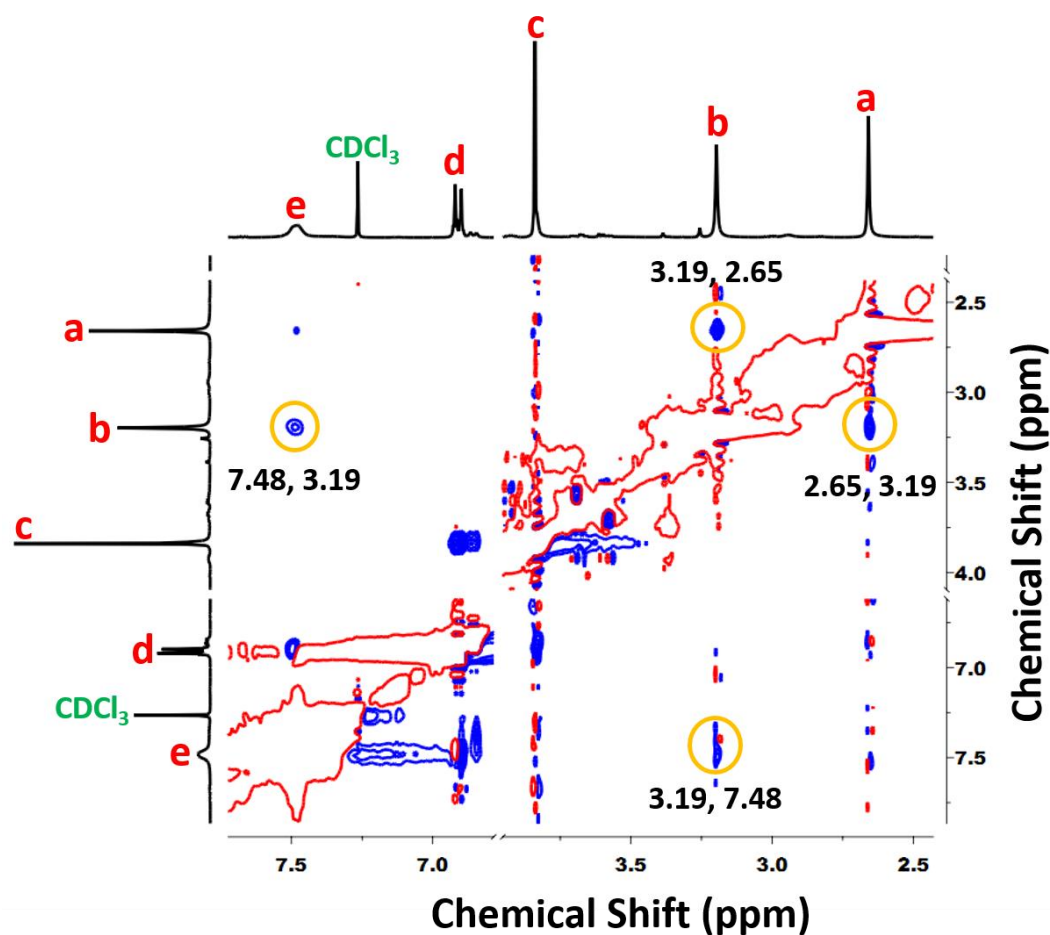

Figure S33 (B). 2D <sup>1</sup>H-<sup>1</sup>H NOESY Correlation enlarged spectra for 8 4-methoxy-*N,N'*-dimethylbenzohydrazide in CDCl<sub>3</sub>.

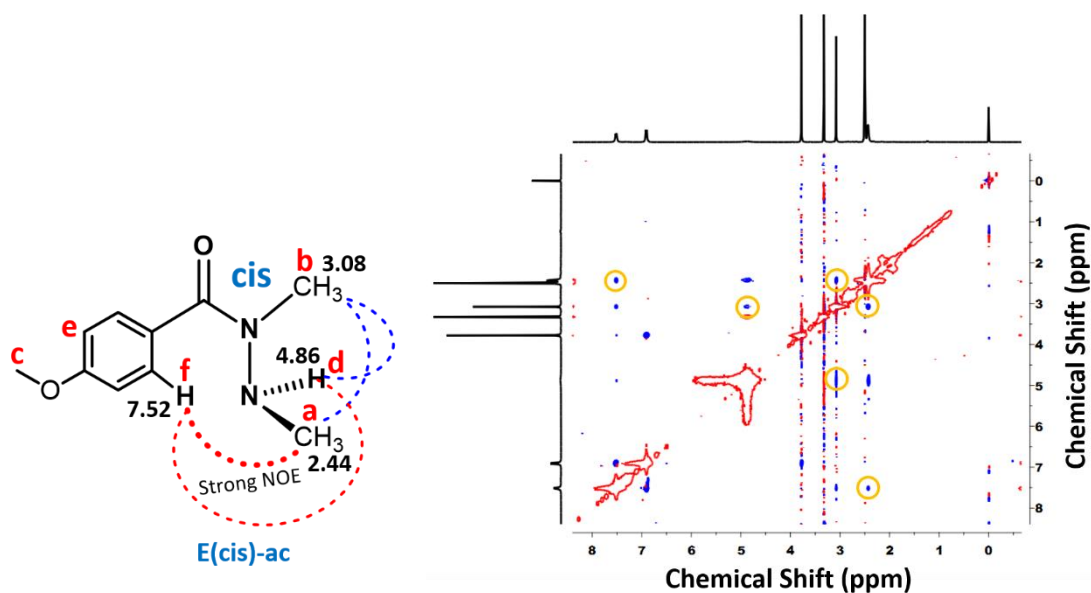

Compound **8**

**Figure S34 (A).** 2D NOESY full spectra for **8** 4-methoxy-*N,N*-dimethylbenzohydrazide in  $[\text{CD}_3]_2\text{SO}$ .

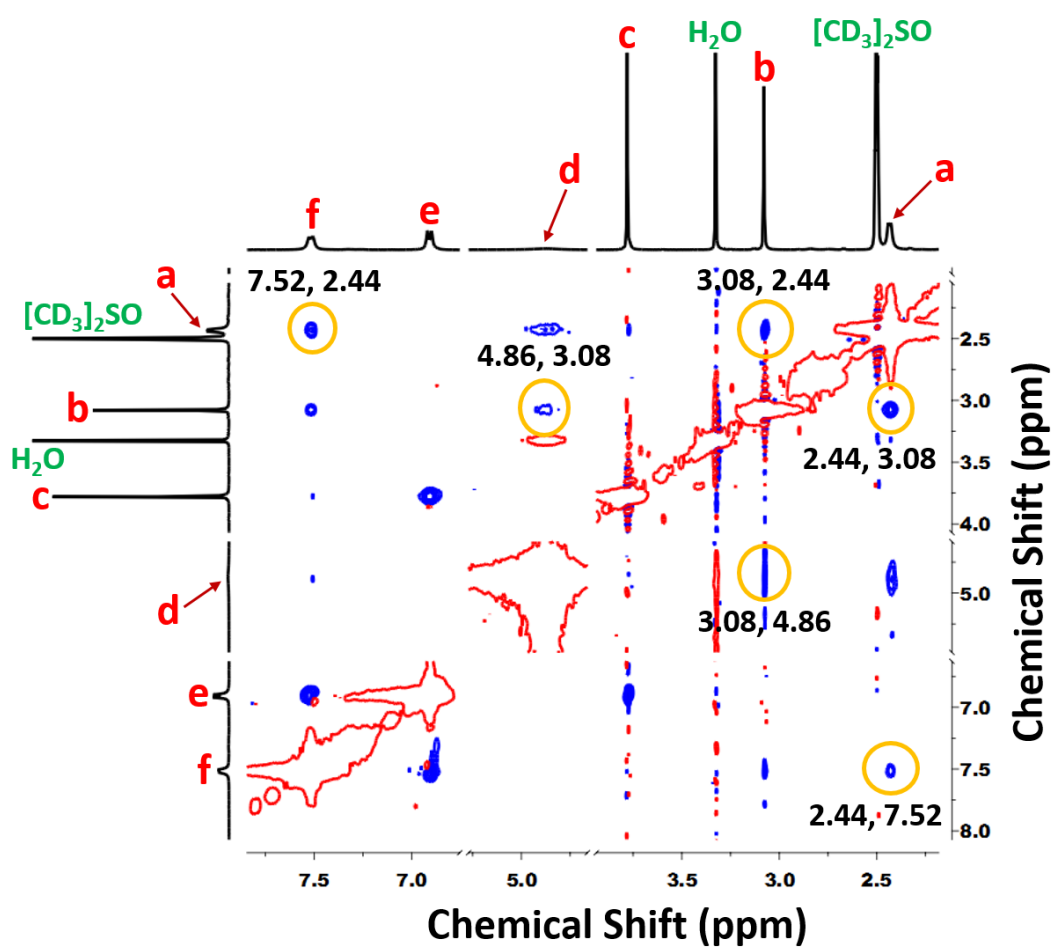

**Figure S34 (B).** 2D  $^1\text{H}$ - $^1\text{H}$  NOESY Correlation enlarged spectra for **8** 4-methoxy-*N,N*-dimethylbenzohydrazide in  $[\text{CD}_3]_2\text{SO}$ .

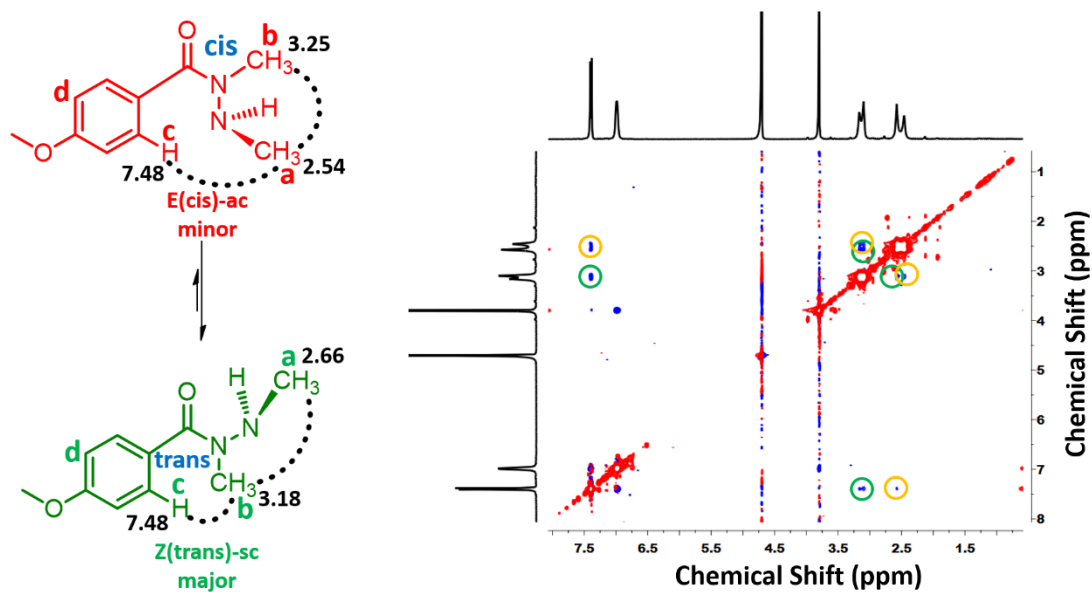

Compound **8**

**Figure S35 (A).** 2D NOESY full spectra for **8** 4-methoxy-*N,N'*-dimethylbenzohydrazide in D<sub>2</sub>O.

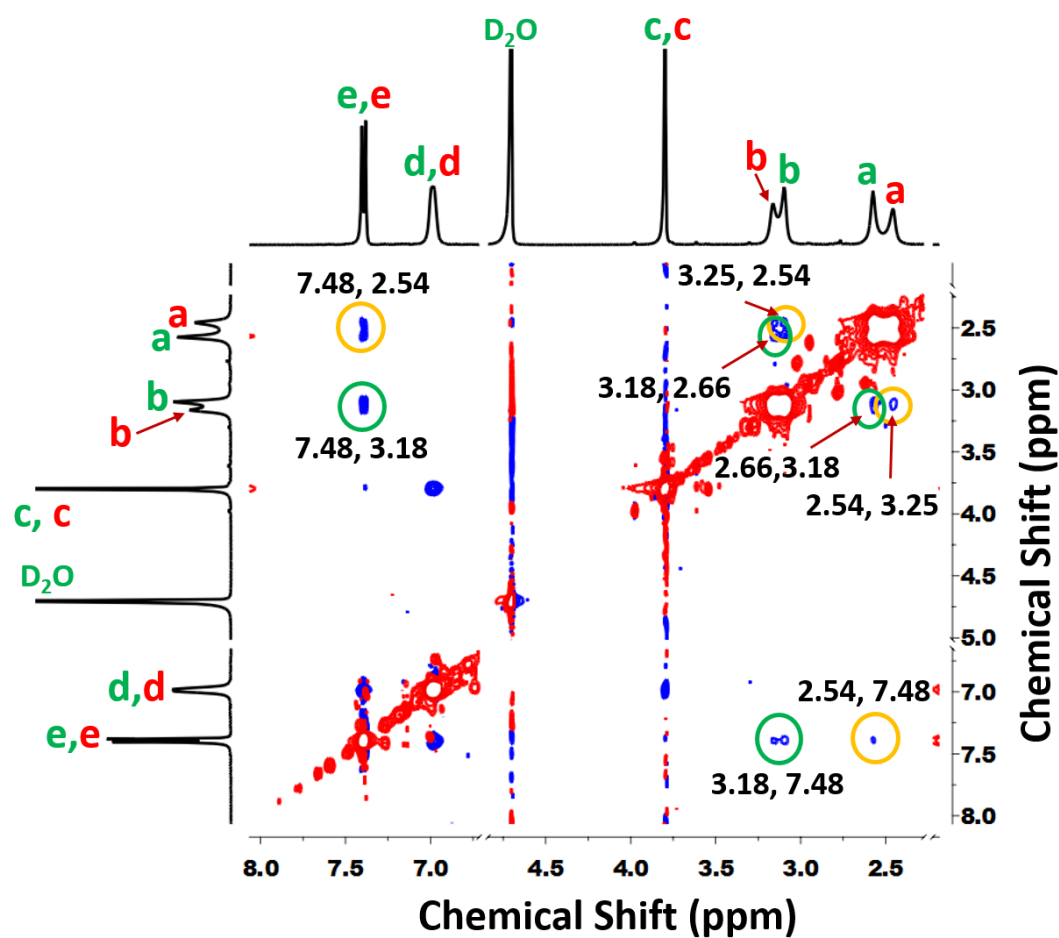

**Figure S35 (B).** 2D <sup>1</sup>H-<sup>1</sup>H NOESY Correlation enlarged spectra for **8** 4-methoxy-*N,N'*-dimethylbenzohydrazide in D<sub>2</sub>O.

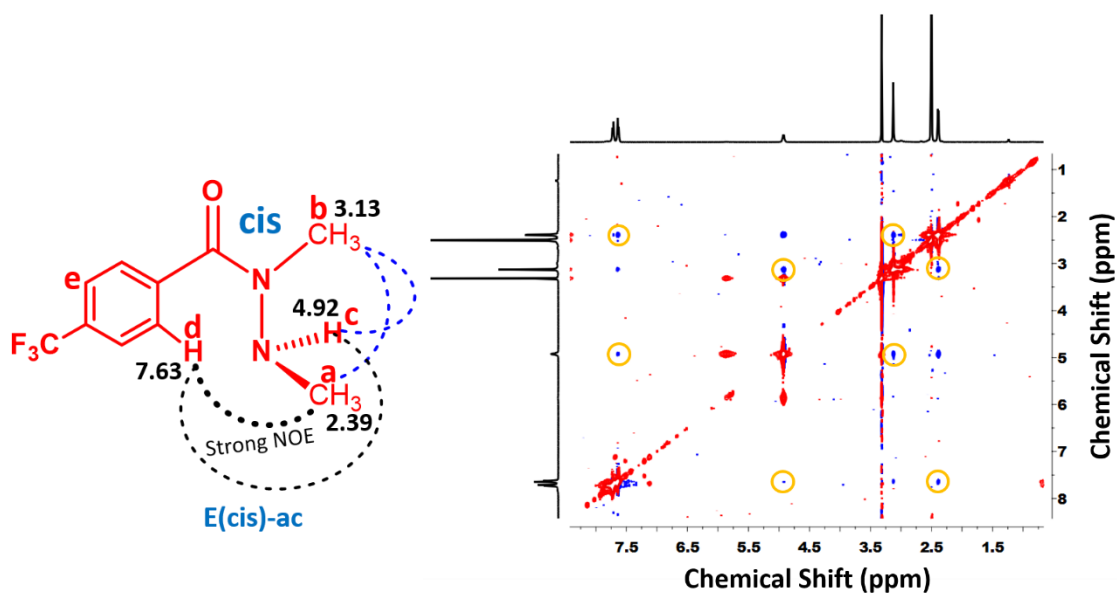

Compound **10** **Figure S36 (A).** 2D NOESY full spectra for **10** *N,N'*-dimethyl-4-(trifluoromethyl)benzohydrazide in  $[\text{CD}_3]_2\text{SO}$ .

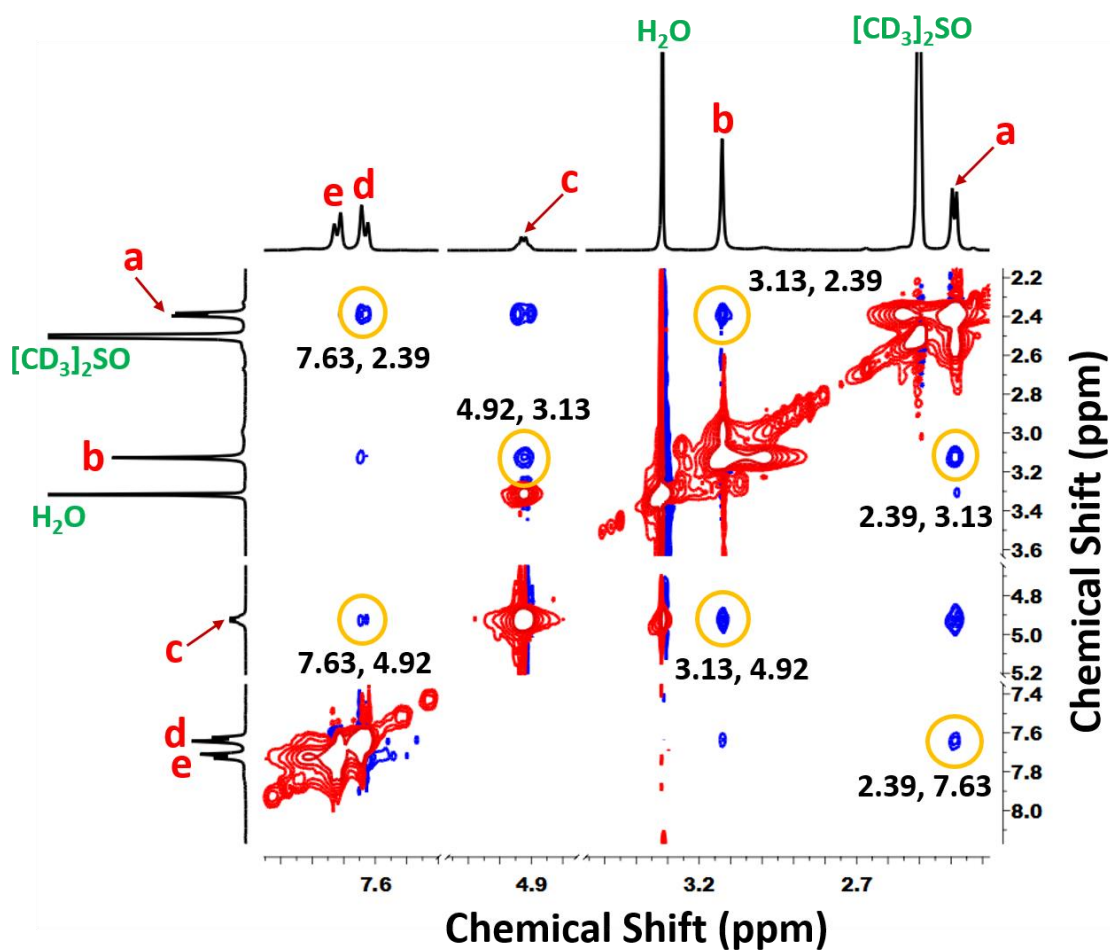

**Figure S36 (B).** 2D  $^1\text{H}$ - $^1\text{H}$  NOESY Correlation enlarged spectra for **10** *N,N'*-dimethyl-4-(trifluoromethyl)benzohydrazide in  $[\text{CD}_3]_2\text{SO}$ .

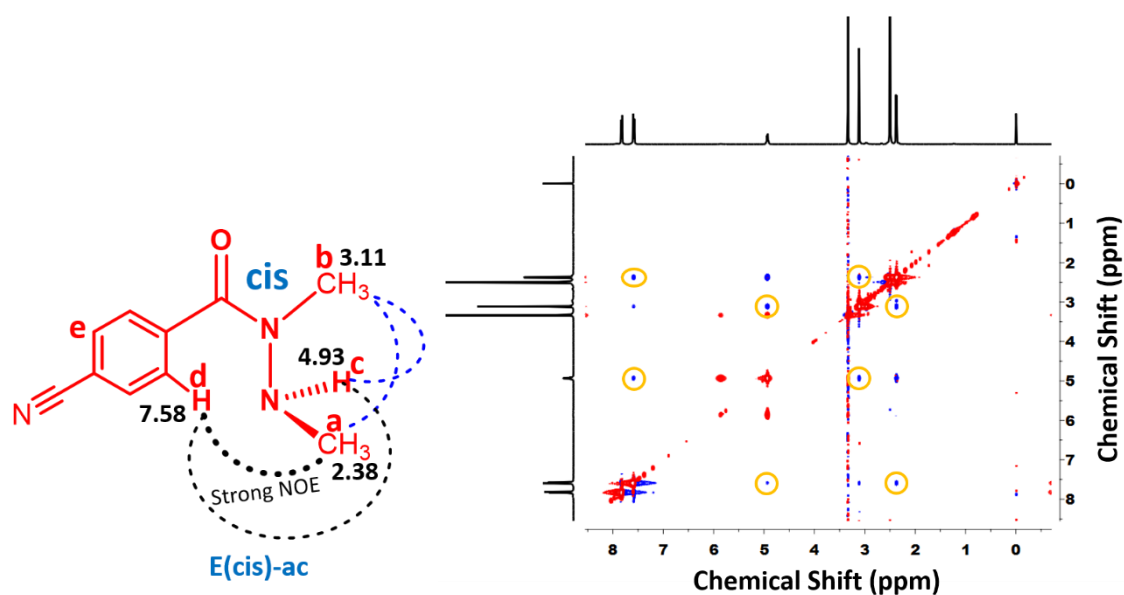

Compound **11** **Figure S37 (A).** 2D NOESY full spectra for **11** 4-cyano-*N,N'*-dimethylbenzohydrazide in  $[\text{CD}_3]_2\text{SO}$ .

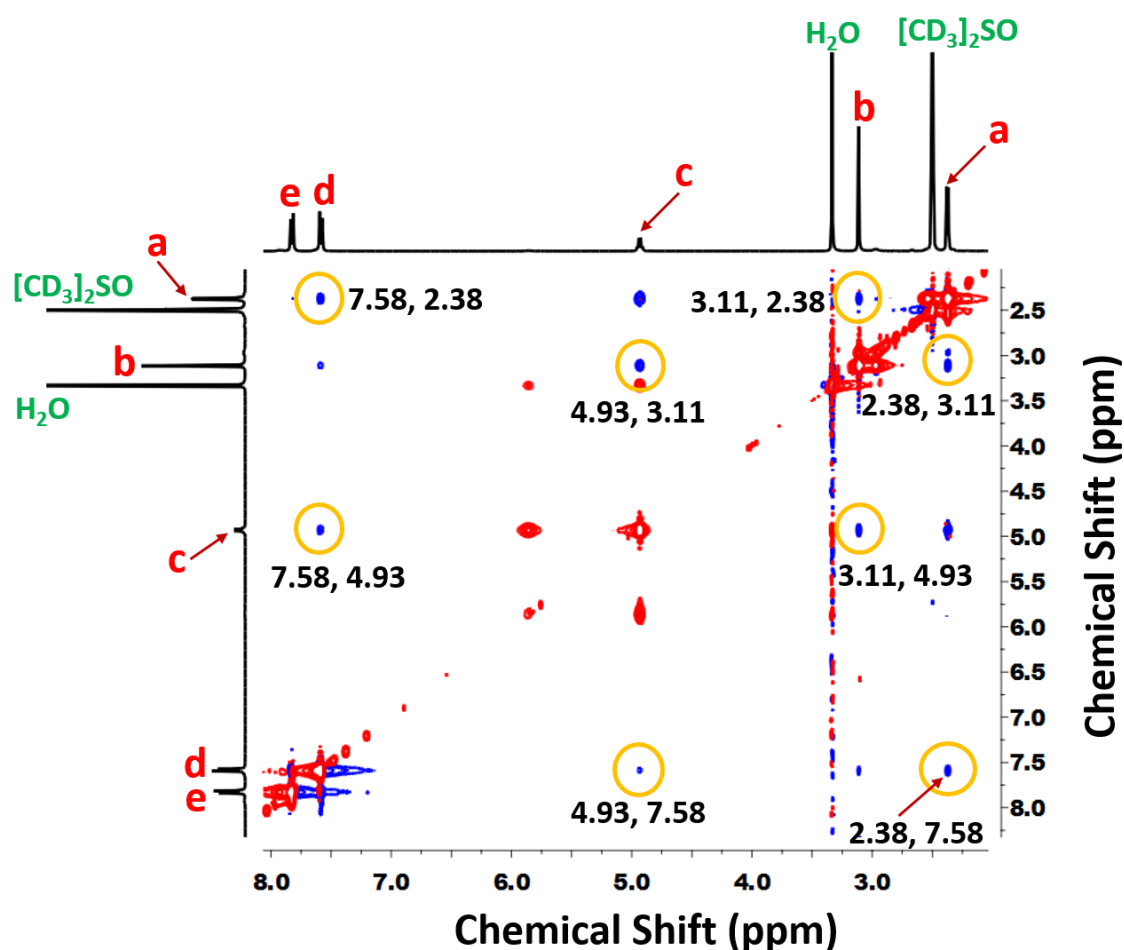

**Figure S37 (B).** 2D  $^1\text{H}$ - $^1\text{H}$  NOESY Correlation enlarged spectra for **11** 4-cyano-*N,N'*-dimethylbenzohydrazide in  $[\text{CD}_3]_2\text{SO}$ .

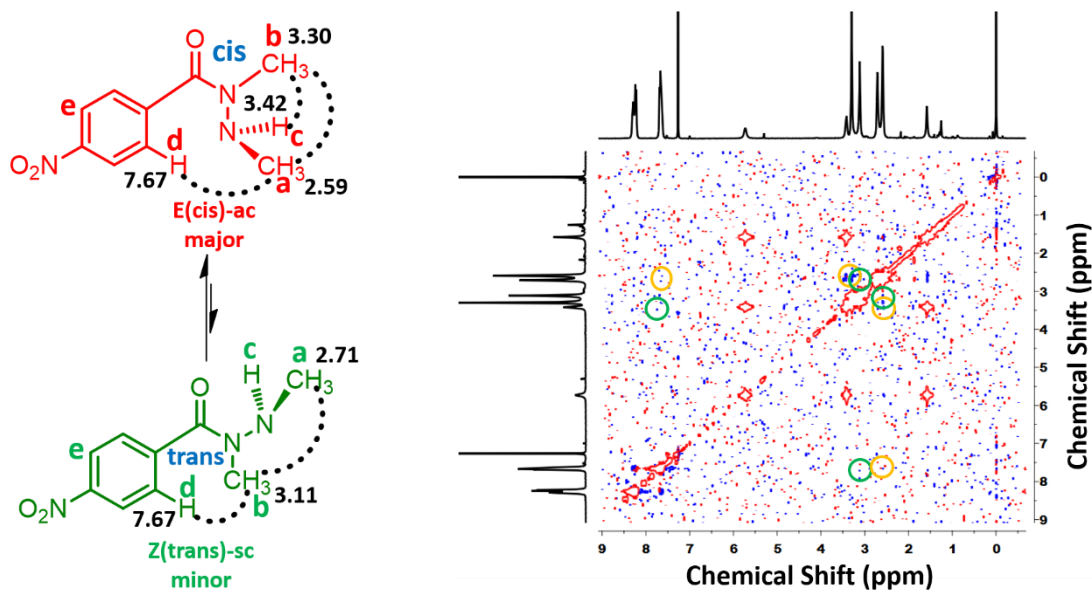

Compound **12**

**Figure S38 (A).** 2D NOESY full spectra for **12** *N,N'*-dimethyl-4-nitrobenzohydrazide in CDCl<sub>3</sub>.

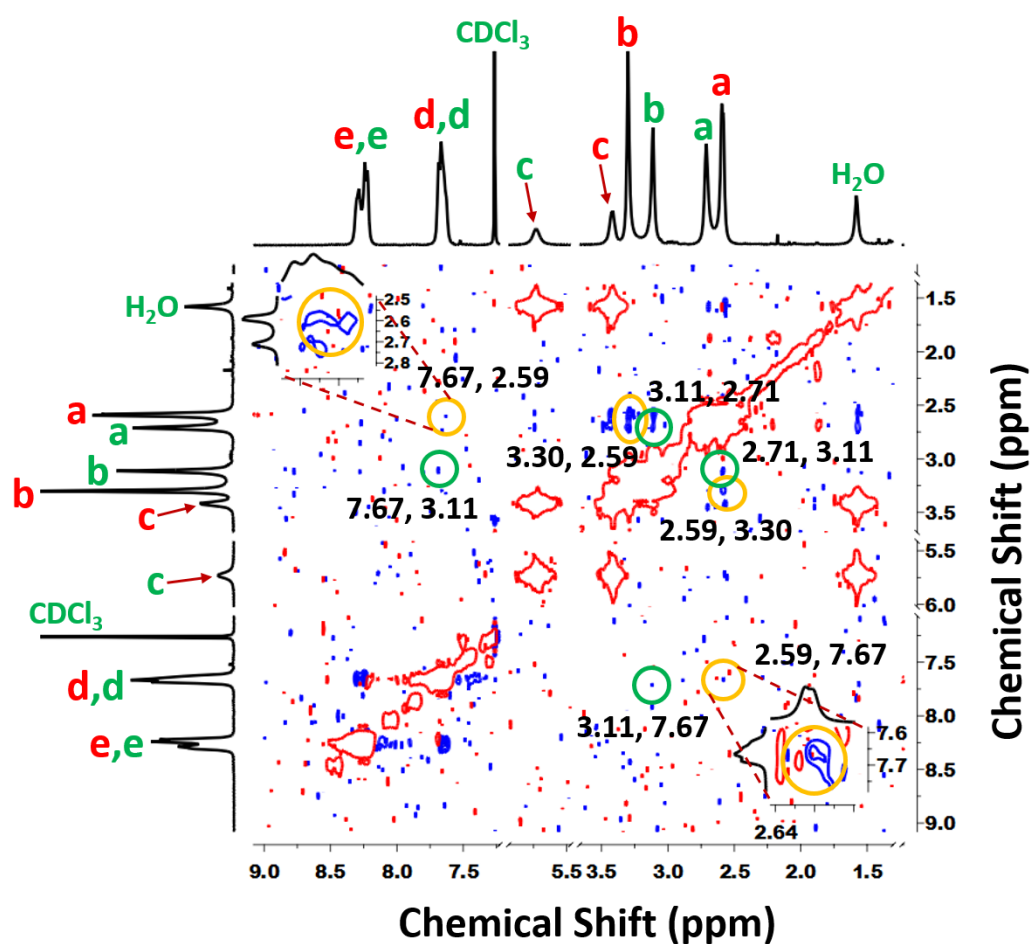

**Figure S38 (B).** 2D <sup>1</sup>H-<sup>1</sup>H NOESY Correlation enlarged spectra for **12** *N,N'*-dimethyl-4-nitrobenzohydrazide in CDCl<sub>3</sub>.

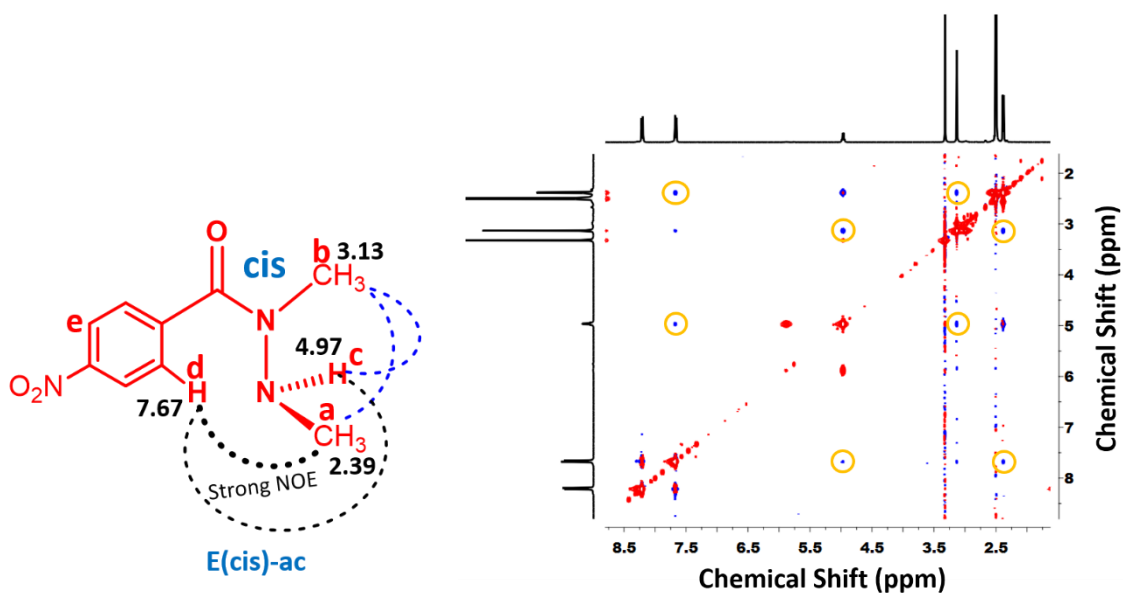

Compound **12**

**Figure S39 (A).** 2D NOESY full spectra for **12** *N,N'*-dimethyl-4-nitrobenzohydrazide in  $[\text{CD}_3]_2\text{SO}$ .

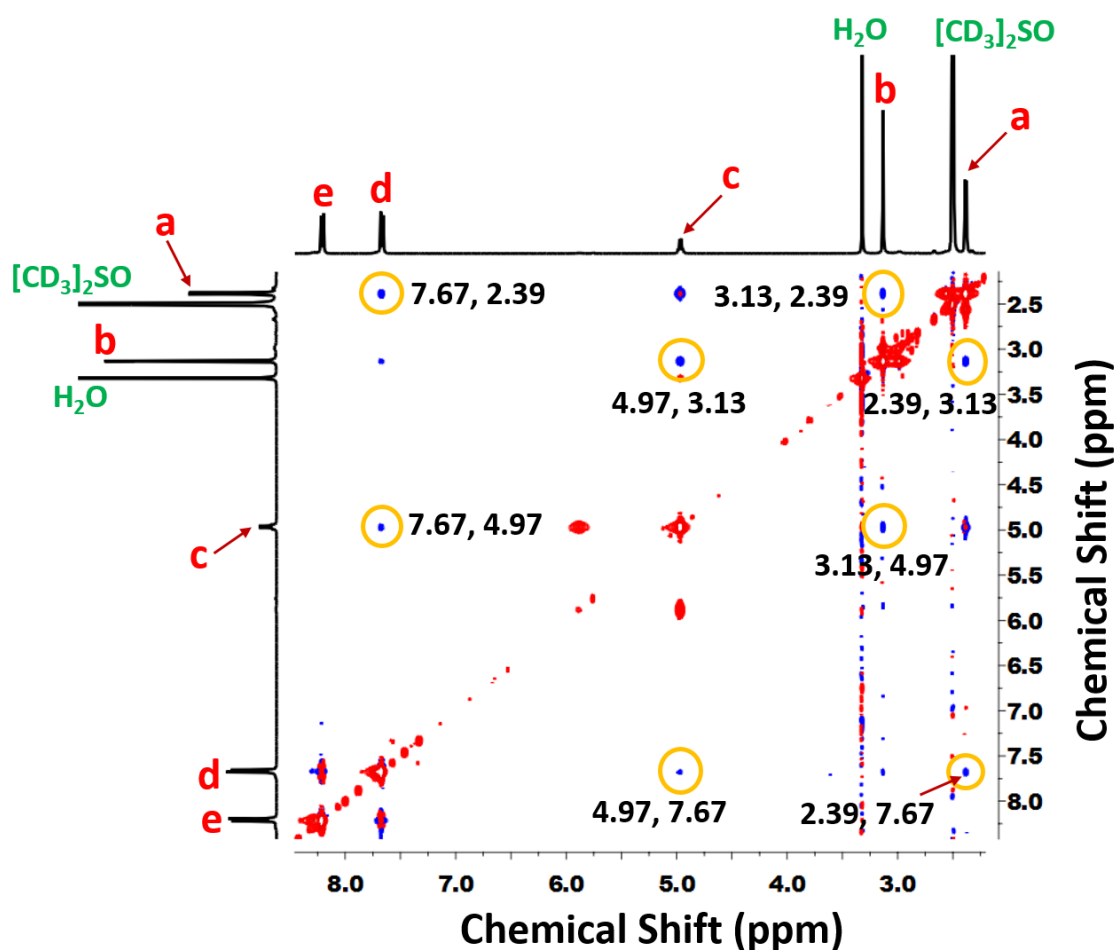

**Figure S39 (B).** 2D  $^1\text{H}$ - $^1\text{H}$  NOESY Correlation enlarged spectra for **12** *N,N'*-dimethyl-4-nitrobenzohydrazide in  $[\text{CD}_3]_2\text{SO}$ .

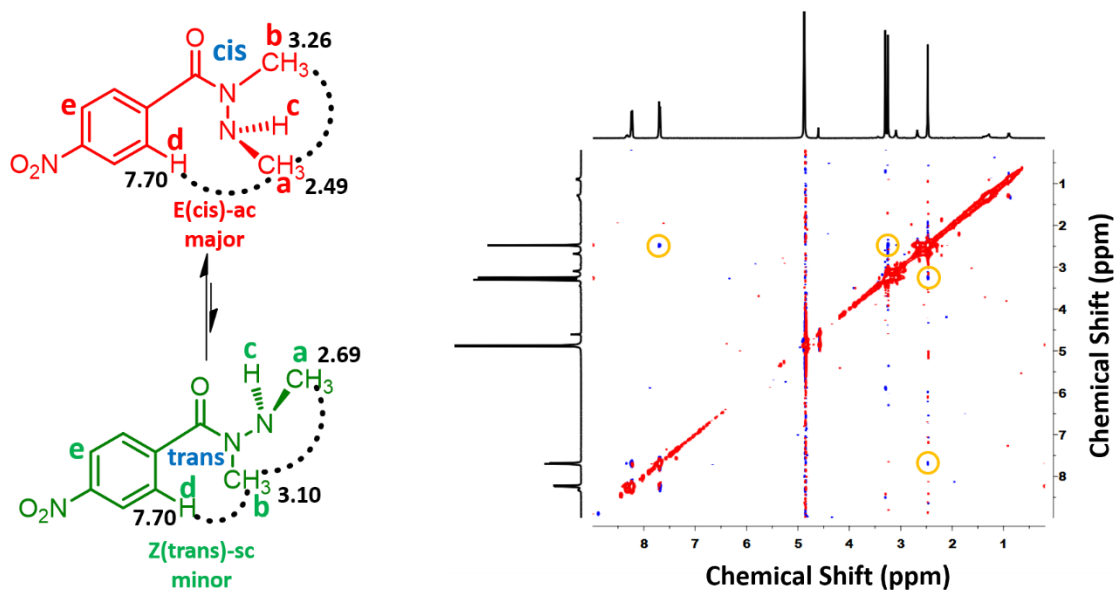

Compound **12**

**Figure S40 (A).** 2D NOESY full spectra for **12** *N,N'*-dimethyl-4-nitrobenzohydrazide in CD<sub>3</sub>OD.

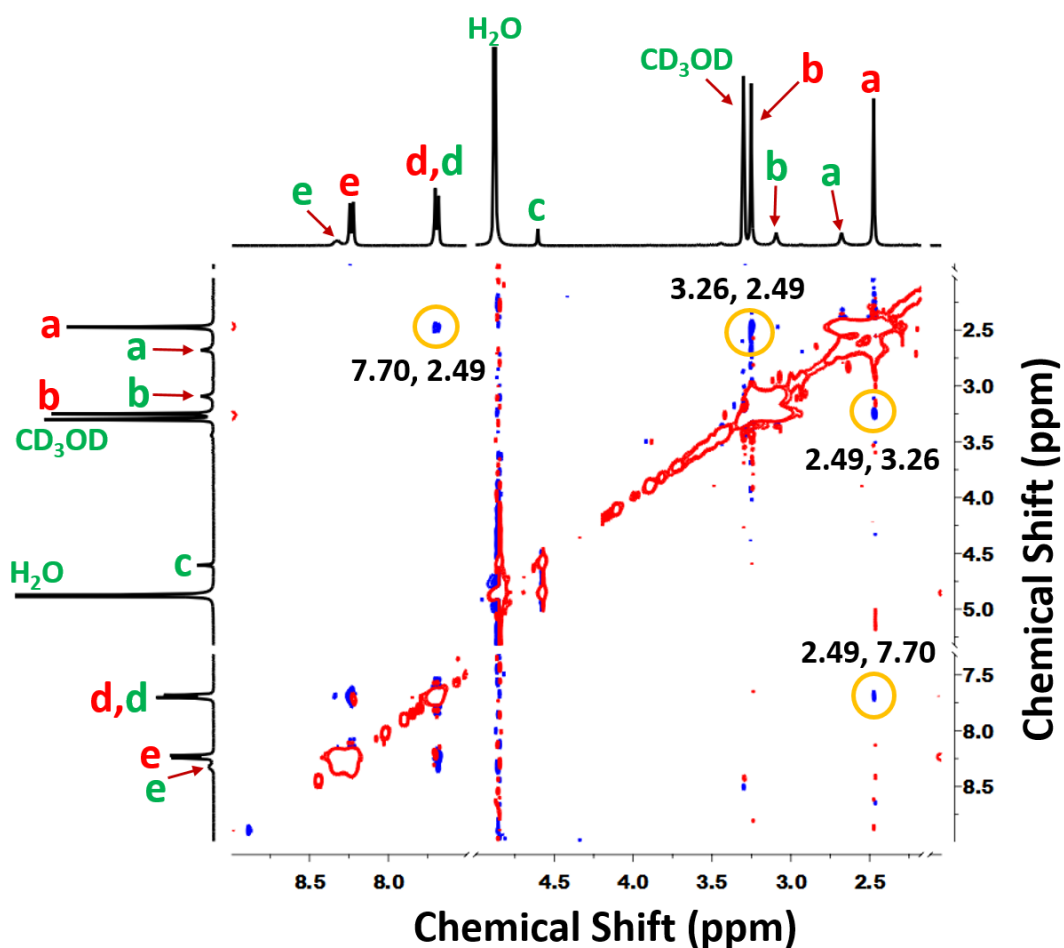

**Figure S40 (B).** 2D <sup>1</sup>H-<sup>1</sup>H NOESY Correlation enlarged spectra for **12** *N,N'*-dimethyl-4-nitrobenzohydrazide in CD<sub>3</sub>OD.



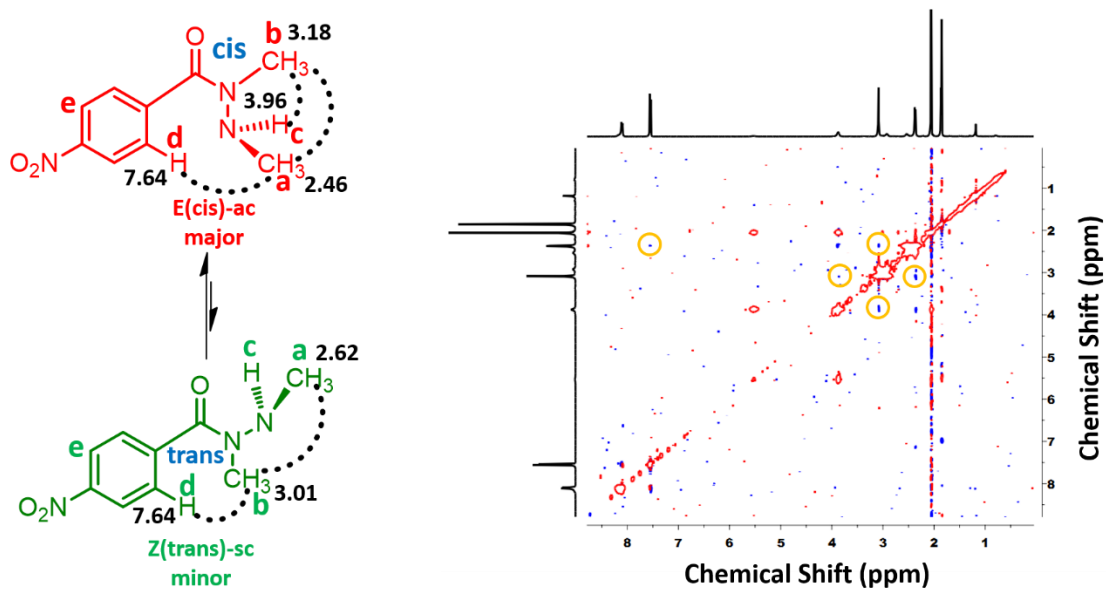

Compound 12

Figure S41 (A). 2D NOESY full spectra for 12 *N,N'*-dimethyl-4-nitrobenzohydrazide in CD<sub>3</sub>CN.

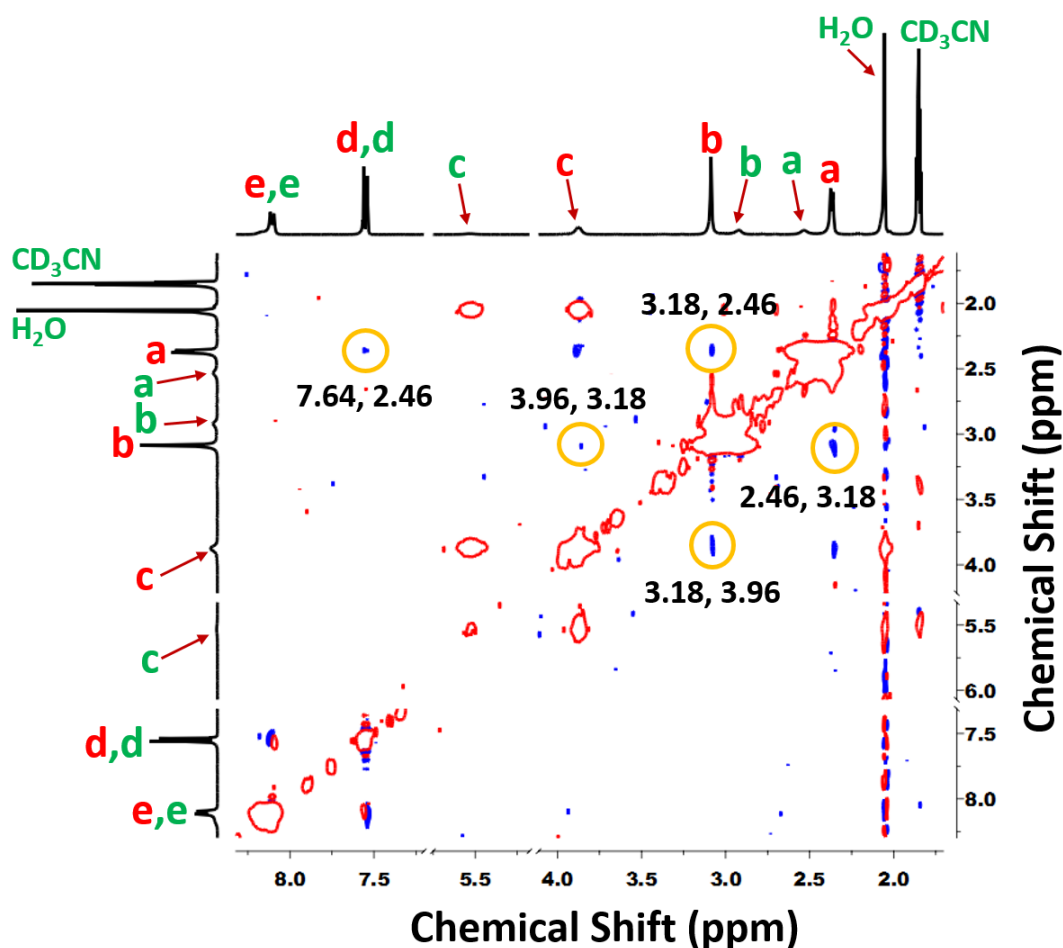

Figure S41 (B). 2D <sup>1</sup>H-<sup>1</sup>H NOESY Correlation enlarged spectra for 12 *N,N'*-dimethyl-4-nitrobenzohydrazide in CD<sub>3</sub>CN.

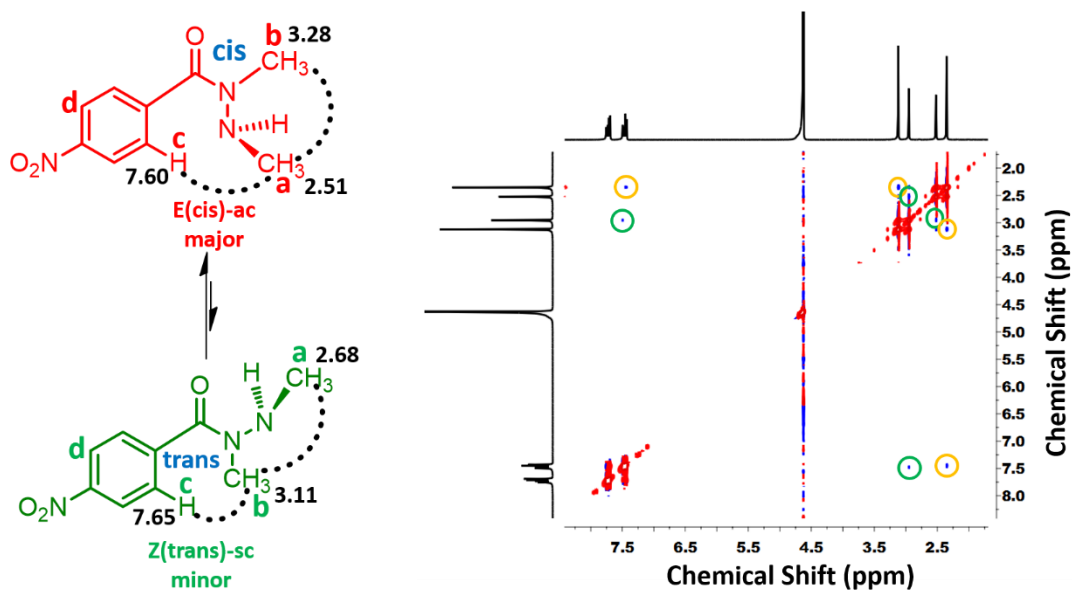

Compound 12

Figure S42 (A). 2D NOESY full spectra for 12 *N,N'*-dimethyl-4-nitrobenzohydrazide in D<sub>2</sub>O.

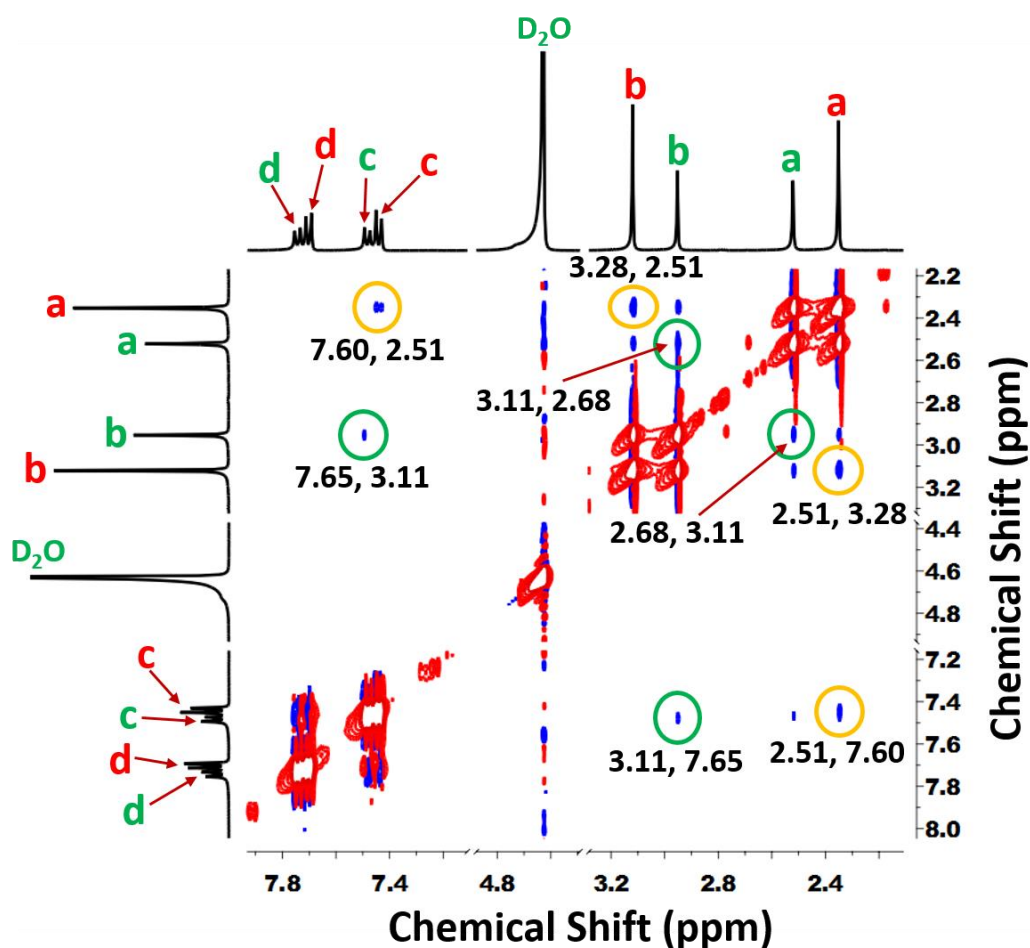

Figure S42 (B). 2D <sup>1</sup>H-<sup>1</sup>H NOESY Correlation enlarged spectra for 12 *N,N'*-dimethyl-4-nitrobenzohydrazide in D<sub>2</sub>O.

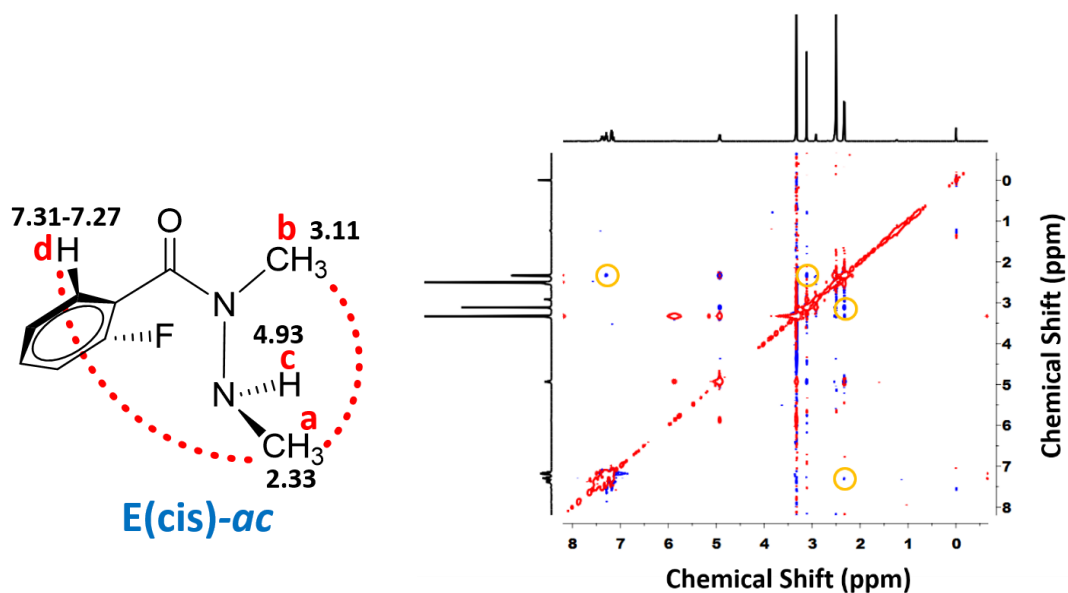

Compound **15**

**Figure S43 (A).** 2D NOESY full spectra for **15** 2-fluoro-*N,N'*-dimethylbenzohydrazide in  $[\text{CD}_3]_2\text{SO}$ .

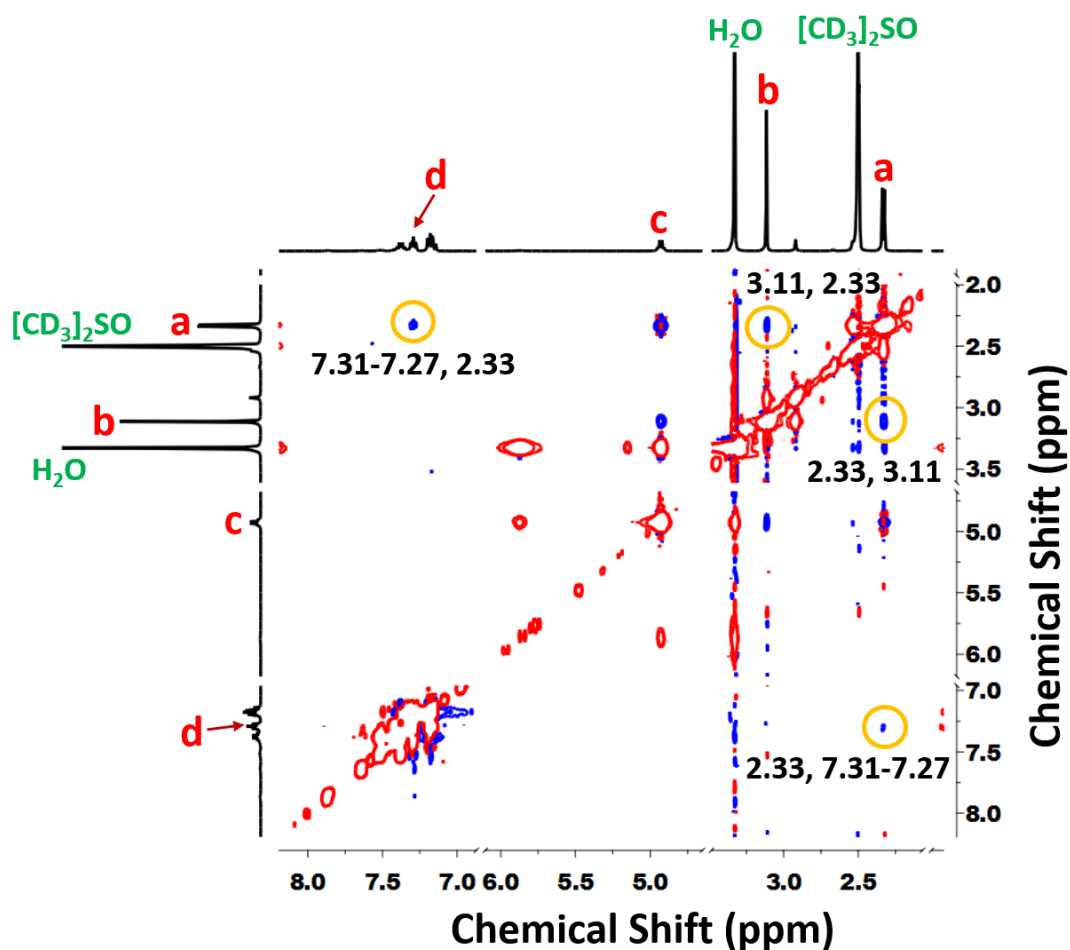

**Figure S43 (B).** 2D  $^1\text{H}$ - $^1\text{H}$  NOESY Correlation enlarged spectra for **15** 2-fluoro-*N,N'*-dimethylbenzohydrazide in  $[\text{CD}_3]_2\text{SO}$ .

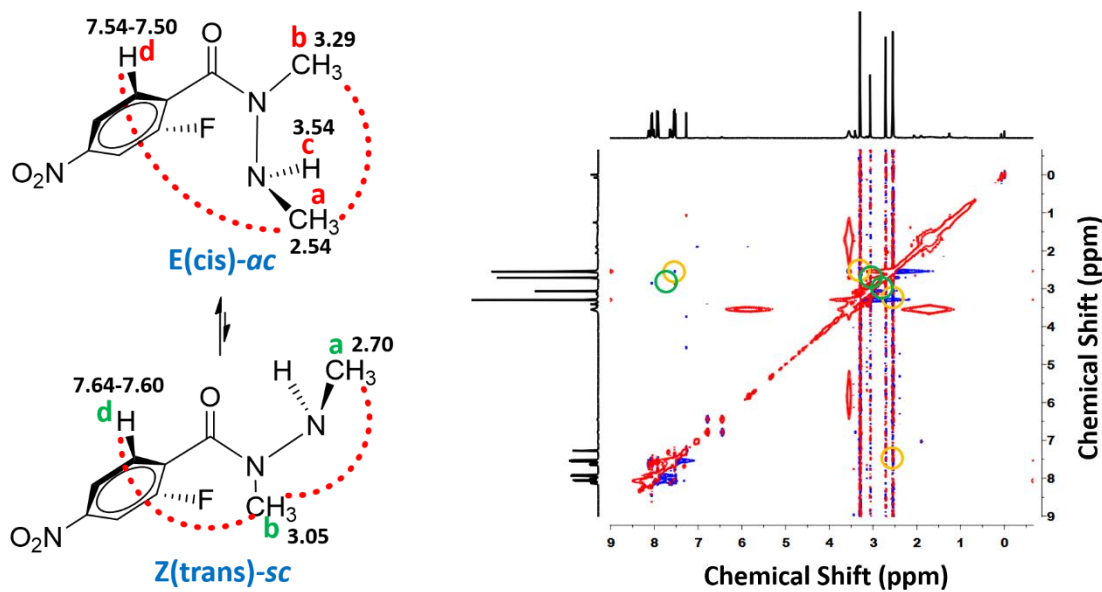

Compound **17**

**Figure S44 (A).** 2D NOESY full spectra for **17** 2-fluoro-*N,N'*-dimethyl-4-nitrobenzohydrazide in CDCl<sub>3</sub>.

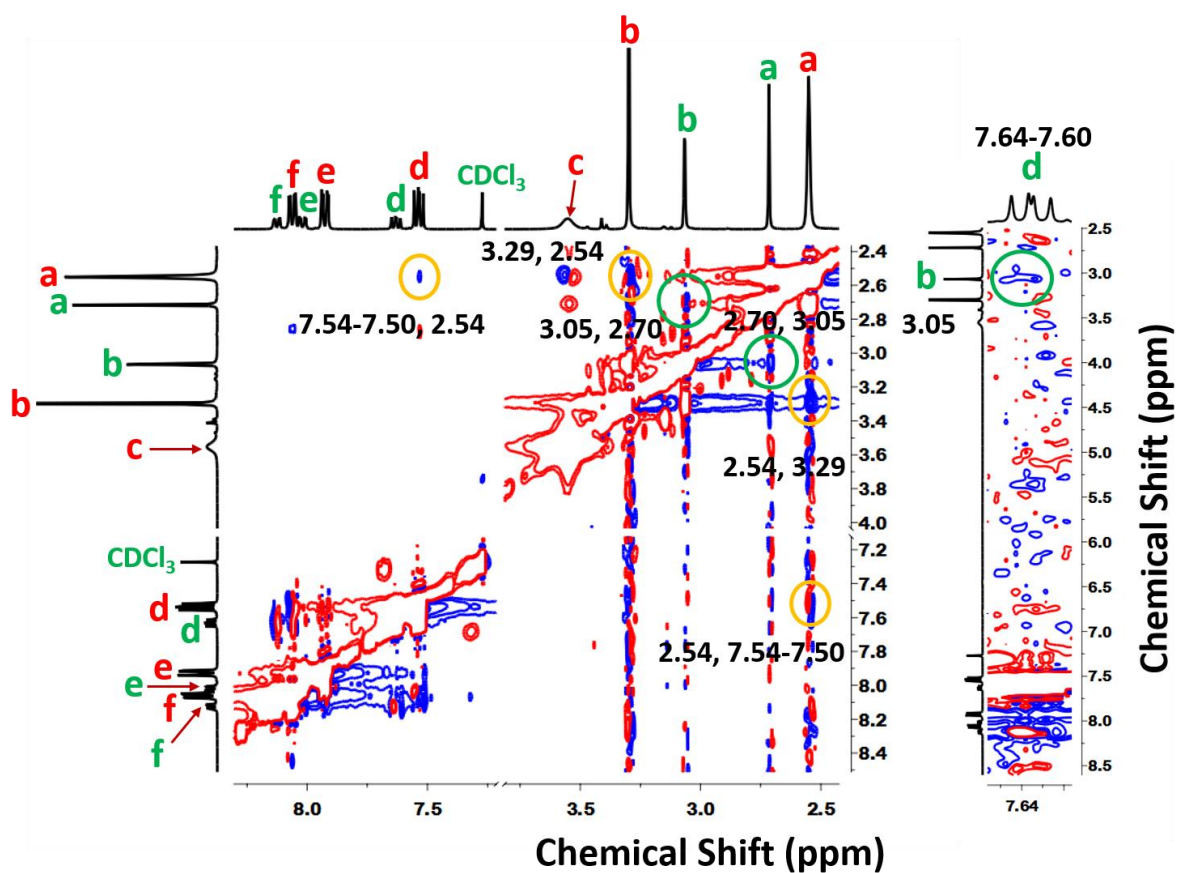

**Figure S44 (B).** 2D <sup>1</sup>H-<sup>1</sup>H NOESY Correlation enlarged spectra for **17** 2-fluoro-*N,N'*-dimethyl-4-nitrobenzohydrazide in CDCl<sub>3</sub>.

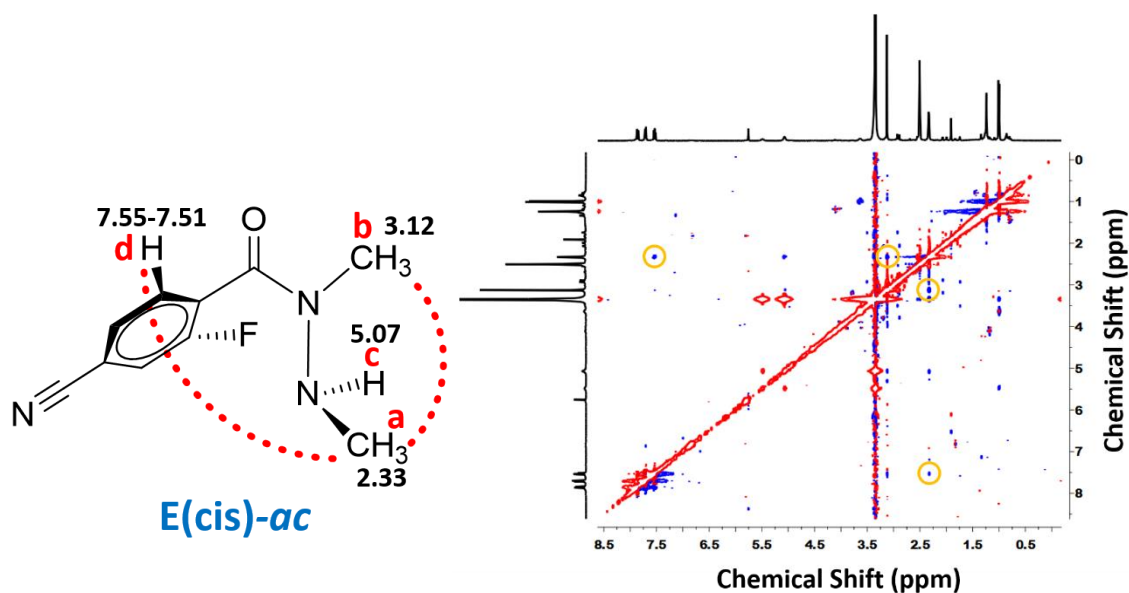

Compound **18**

**Figure S45 (A).** 2D NOESY full spectra for **18** 4-cyano-2-fluoro-*N,N'*-dimethylbenzohydrazide in  $[\text{CD}_3]_2\text{SO}$ .

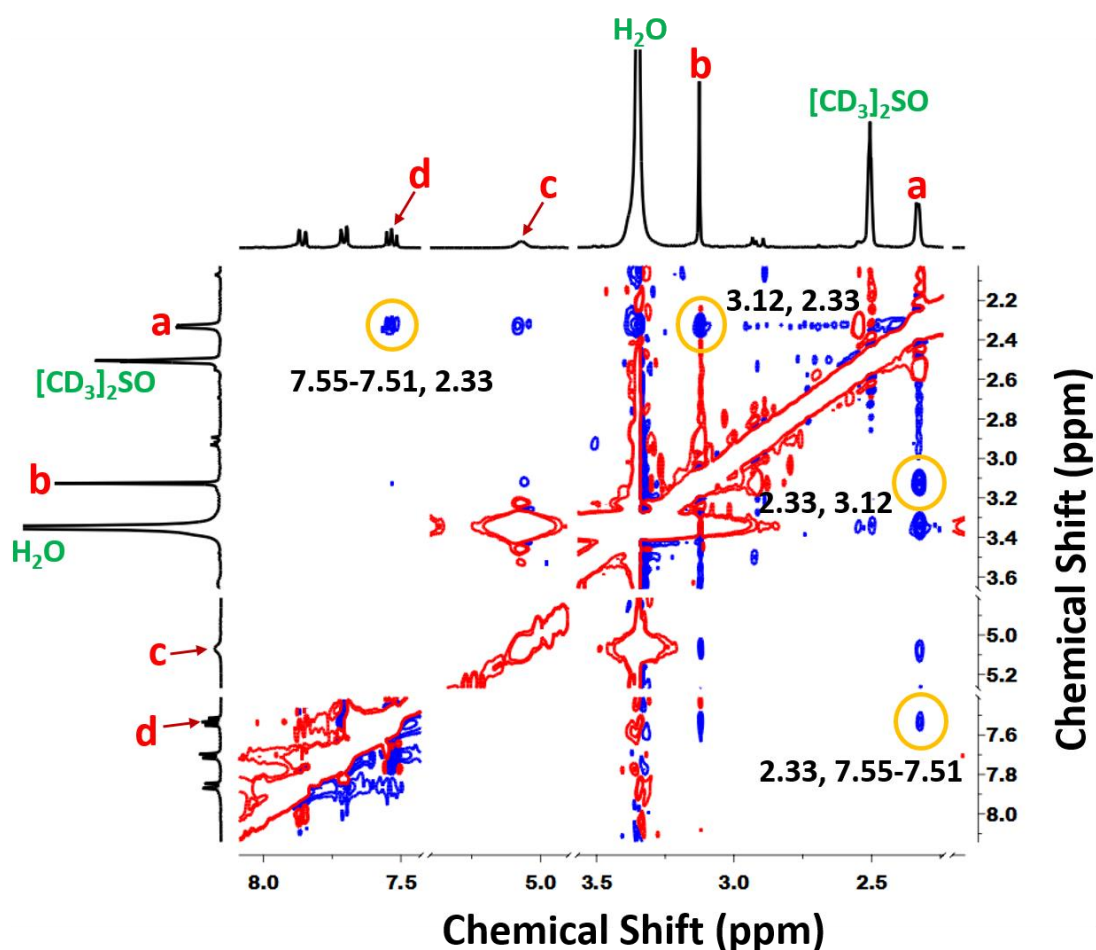

**Figure S45 (B).** 2D  $^1\text{H}$ - $^1\text{H}$  NOESY Correlation enlarged spectra for **18** 4-cyano-2-fluoro-*N,N'*-dimethylbenzohydrazide in  $[\text{CD}_3]_2\text{SO}$ .

## I. Cartesian Coordinates

|                                                                                                                                               |              |              |              |                                                                                                                                                |              |              |              |
|-----------------------------------------------------------------------------------------------------------------------------------------------|--------------|--------------|--------------|------------------------------------------------------------------------------------------------------------------------------------------------|--------------|--------------|--------------|
| 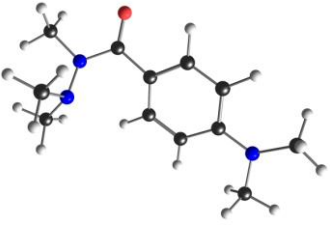 <p style="text-align: center;"><b>1</b><br/><b>E-ac</b></p> |              |              |              |  <p style="text-align: center;"><b>1</b><br/><b>E-sc</b></p> |              |              |              |
| 8                                                                                                                                             | 1.957626000  | -2.292521000 | -0.485057000 | 8                                                                                                                                              | -2.164877000 | -2.140252000 | 0.709292000  |
| 7                                                                                                                                             | 2.696036000  | -0.174502000 | -0.315859000 | 7                                                                                                                                              | -2.794256000 | 0.015234000  | 0.383834000  |
| 7                                                                                                                                             | 2.465476000  | 1.030585000  | 0.368788000  | 7                                                                                                                                              | -2.706697000 | 1.021744000  | -0.599055000 |
| 6                                                                                                                                             | -0.216517000 | 0.562792000  | -0.692296000 | 6                                                                                                                                              | 0.149347000  | 0.487087000  | 0.927560000  |
| 6                                                                                                                                             | -1.563680000 | 0.866583000  | -0.642731000 | 6                                                                                                                                              | 1.500238000  | 0.767749000  | 0.811177000  |
| 6                                                                                                                                             | -2.495870000 | -0.053436000 | -0.125923000 | 6                                                                                                                                              | 2.339325000  | -0.044272000 | 0.027193000  |
| 6                                                                                                                                             | -2.003609000 | -1.288526000 | 0.332953000  | 6                                                                                                                                              | 1.765855000  | -1.179108000 | -0.579442000 |
| 6                                                                                                                                             | -0.656216000 | -1.584197000 | 0.252568000  | 6                                                                                                                                              | 0.421644000  | -1.457192000 | -0.430838000 |
| 6                                                                                                                                             | 0.264034000  | -0.664932000 | -0.243371000 | 6                                                                                                                                              | -0.414367000 | -0.613870000 | 0.295529000  |
| 6                                                                                                                                             | 1.681518000  | -1.114733000 | -0.345426000 | 6                                                                                                                                              | -1.843800000 | -0.992682000 | 0.467662000  |
| 6                                                                                                                                             | 4.055264000  | -0.701985000 | -0.359733000 | 6                                                                                                                                              | -4.172362000 | -0.396872000 | 0.622296000  |
| 6                                                                                                                                             | 2.903476000  | 0.972589000  | 1.755670000  | 6                                                                                                                                              | -2.222476000 | 0.606785000  | -1.903255000 |
| 6                                                                                                                                             | 3.008894000  | 2.173508000  | -0.342079000 | 6                                                                                                                                              | -2.215374000 | 2.314240000  | -0.165591000 |
| 1                                                                                                                                             | 0.467834000  | 1.293462000  | -1.100057000 | 1                                                                                                                                              | -0.470715000 | 1.116703000  | 1.553588000  |
| 1                                                                                                                                             | -1.890458000 | 1.827486000  | -1.011902000 | 1                                                                                                                                              | 1.901201000  | 1.617026000  | 1.344367000  |
| 1                                                                                                                                             | -2.674482000 | -2.027810000 | 0.744874000  | 1                                                                                                                                              | 2.374344000  | -1.855344000 | -1.161477000 |
| 1                                                                                                                                             | -0.293832000 | -2.551024000 | 0.579290000  | 1                                                                                                                                              | 0.000201000  | -2.348178000 | -0.881112000 |
| 1                                                                                                                                             | 4.303266000  | -1.270202000 | 0.541208000  | 1                                                                                                                                              | -4.575914000 | -0.950865000 | -0.230965000 |
| 1                                                                                                                                             | 4.145476000  | -1.369064000 | -1.212824000 | 1                                                                                                                                              | -4.209256000 | -1.036671000 | 1.500114000  |
| 1                                                                                                                                             | 4.752305000  | 0.126602000  | -0.474146000 | 1                                                                                                                                              | -4.764061000 | 0.501649000  | 0.783541000  |
| 1                                                                                                                                             | 3.995645000  | 0.898771000  | 1.859255000  | 1                                                                                                                                              | -2.635740000 | -0.373746000 | -2.143622000 |
| 1                                                                                                                                             | 2.569503000  | 1.878840000  | 2.261515000  | 1                                                                                                                                              | -2.583345000 | 1.321864000  | -2.645653000 |
| 1                                                                                                                                             | 2.438873000  | 0.112996000  | 2.239655000  | 1                                                                                                                                              | -1.127230000 | 0.560062000  | -1.967710000 |
| 1                                                                                                                                             | 2.667479000  | 2.146823000  | -1.376525000 | 1                                                                                                                                              | -1.122312000 | 2.402794000  | -0.209018000 |
| 1                                                                                                                                             | 2.635987000  | 3.083071000  | 0.130927000  | 1                                                                                                                                              | -2.643621000 | 3.079703000  | -0.817081000 |
| 1                                                                                                                                             | 4.107784000  | 2.212915000  | -0.333704000 | 1                                                                                                                                              | -2.552332000 | 2.499951000  | 0.853615000  |
| 7                                                                                                                                             | -3.844498000 | 0.240327000  | -0.086849000 | 7                                                                                                                                              | 3.676937000  | 0.256810000  | -0.140275000 |
| 6                                                                                                                                             | -4.720256000 | -0.619388000 | 0.683146000  | 6                                                                                                                                              | 4.552875000  | -0.757207000 | -0.693404000 |
| 1                                                                                                                                             | -4.723593000 | -1.632102000 | 0.276420000  | 1                                                                                                                                              | 4.257740000  | -1.009274000 | -1.713314000 |
| 1                                                                                                                                             | -4.429763000 | -0.673374000 | 1.740146000  | 1                                                                                                                                              | 5.566115000  | -0.364578000 | -0.733225000 |
| 1                                                                                                                                             | -5.736205000 | -0.236730000 | 0.620620000  | 1                                                                                                                                              | 4.556699000  | -1.677976000 | -0.096710000 |
| 6                                                                                                                                             | -4.265329000 | 1.608036000  | -0.311585000 | 6                                                                                                                                              | 4.272415000  | 1.261778000  | 0.716890000  |
| 1                                                                                                                                             | -5.346498000 | 1.667200000  | -0.210650000 | 1                                                                                                                                              | 5.324041000  | 1.367260000  | 0.461167000  |
| 1                                                                                                                                             | -3.808755000 | 2.308394000  | 0.399350000  | 1                                                                                                                                              | 3.796673000  | 2.231645000  | 0.561773000  |
| 1                                                                                                                                             | -4.010925000 | 1.931186000  | -1.322723000 | 1                                                                                                                                              | 4.194710000  | 1.004856000  | 1.781193000  |

|                                                                                                                                                 |              |              |              |                                                                                                                                                  |              |              |              |
|-------------------------------------------------------------------------------------------------------------------------------------------------|--------------|--------------|--------------|--------------------------------------------------------------------------------------------------------------------------------------------------|--------------|--------------|--------------|
| 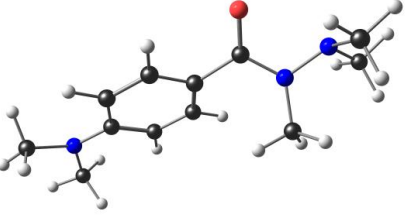 <p style="text-align: center;"><b>1</b><br/><b>Z-ac</b></p> |              |              |              |  <p style="text-align: center;"><b>1</b><br/><b>Z-sc</b></p> |              |              |              |
| 8                                                                                                                                               | -1.920106000 | 1.768547000  | 0.773258000  | 8                                                                                                                                                | -2.051238000 | -1.550725000 | -0.594060000 |
| 7                                                                                                                                               | -2.410817000 | -0.295431000 | -0.050552000 | 7                                                                                                                                                | -2.423145000 | 0.509299000  | 0.271904000  |
| 7                                                                                                                                               | -3.760909000 | -0.056849000 | 0.272065000  | 7                                                                                                                                                | -3.811427000 | 0.435908000  | 0.045999000  |

|   |              |              |              |   |              |              |              |
|---|--------------|--------------|--------------|---|--------------|--------------|--------------|
| 6 | 0.792365000  | 1.467632000  | -0.045361000 | 6 | 0.690916000  | -1.388531000 | 0.173585000  |
| 6 | 2.158904000  | 1.277108000  | -0.109130000 | 6 | 2.067499000  | -1.276062000 | 0.176231000  |
| 6 | 2.720481000  | 0.005651000  | 0.116571000  | 6 | 2.691041000  | -0.048277000 | -0.116625000 |
| 6 | 1.838301000  | -1.056892000 | 0.388345000  | 6 | 1.860180000  | 1.055234000  | -0.386390000 |
| 6 | 0.471646000  | -0.849412000 | 0.429315000  | 6 | 0.483209000  | 0.927405000  | -0.363854000 |
| 6 | -0.076102000 | 0.410120000  | 0.205983000  | 6 | -0.125740000 | -0.290022000 | -0.076106000 |
| 6 | -1.534890000 | 0.707559000  | 0.329297000  | 6 | -1.602182000 | -0.512369000 | -0.138733000 |
| 6 | -2.143424000 | -1.208164000 | -1.158295000 | 6 | -2.075145000 | 1.537831000  | 1.237795000  |
| 6 | -4.441130000 | 0.768472000  | -0.713450000 | 6 | -4.462935000 | -0.606650000 | 0.835221000  |
| 6 | -4.458066000 | -1.293564000 | 0.560991000  | 6 | -4.143879000 | 0.368482000  | -1.370746000 |
| 1 | 0.373374000  | 2.456467000  | -0.187242000 | 1 | 0.223910000  | -2.347496000 | 0.362602000  |
| 1 | 2.791773000  | 2.124673000  | -0.327134000 | 1 | 2.658420000  | -2.152501000 | 0.397417000  |
| 1 | 2.219256000  | -2.049475000 | 0.578160000  | 1 | 2.287830000  | 2.017682000  | -0.625328000 |
| 1 | -0.179272000 | -1.685451000 | 0.659031000  | 1 | -0.125385000 | 1.794105000  | -0.595591000 |
| 1 | -2.875313000 | -1.049869000 | -1.953655000 | 1 | -2.771791000 | 1.479231000  | 2.076650000  |
| 1 | -1.155238000 | -1.023577000 | -1.568156000 | 1 | -1.066458000 | 1.387336000  | 1.611007000  |
| 1 | -2.202008000 | -2.250700000 | -0.836628000 | 1 | -2.159710000 | 2.532057000  | 0.793738000  |
| 1 | -4.567177000 | 0.274058000  | -1.688365000 | 1 | -4.149716000 | -0.511491000 | 1.875897000  |
| 1 | -5.431665000 | 1.009638000  | -0.326726000 | 1 | -5.540027000 | -0.439290000 | 0.788781000  |
| 1 | -3.883636000 | 1.695319000  | -0.835408000 | 1 | -4.230312000 | -1.613485000 | 0.478397000  |
| 1 | -3.895154000 | -1.856871000 | 1.305188000  | 1 | -3.868515000 | -0.586818000 | -1.828287000 |
| 1 | -5.434058000 | -1.044242000 | 0.978045000  | 1 | -5.220296000 | 0.518288000  | -1.466388000 |
| 1 | -4.617776000 | -1.927200000 | -0.325483000 | 1 | -3.635252000 | 1.180590000  | -1.890023000 |
| 7 | 4.086081000  | -0.190055000 | 0.089039000  | 7 | 4.065400000  | 0.065474000  | -0.157577000 |
| 6 | 4.593234000  | -1.546828000 | 0.054491000  | 6 | 4.654417000  | 1.388508000  | -0.192651000 |
| 1 | 4.326427000  | -2.085290000 | 0.965752000  | 1 | 4.375059000  | 1.914858000  | -1.107229000 |
| 1 | 4.211354000  | -2.112649000 | -0.804834000 | 1 | 4.352034000  | 2.002431000  | 0.665123000  |
| 1 | 5.678618000  | -1.518415000 | -0.003757000 | 1 | 5.737568000  | 1.293970000  | -0.186426000 |
| 6 | 4.929897000  | 0.863082000  | -0.438509000 | 6 | 4.870251000  | -1.022882000 | 0.358919000  |
| 1 | 4.675403000  | 1.123474000  | -1.473689000 | 1 | 4.660489000  | -1.233615000 | 1.415227000  |
| 1 | 4.852107000  | 1.764707000  | 0.171570000  | 1 | 4.698841000  | -1.936217000 | -0.213462000 |
| 1 | 5.966036000  | 0.534798000  | -0.408088000 | 1 | 5.921635000  | -0.764601000 | 0.258223000  |

|                                                                                                                                                 |              |              |              |                                                                                                                                                  |              |              |              |
|-------------------------------------------------------------------------------------------------------------------------------------------------|--------------|--------------|--------------|--------------------------------------------------------------------------------------------------------------------------------------------------|--------------|--------------|--------------|
| 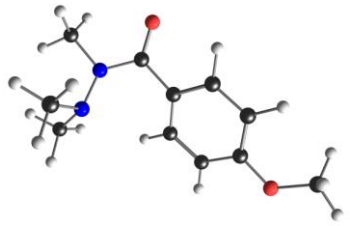 <p style="text-align: center;"><b>2</b><br/><b>E-ac</b></p> |              |              |              |  <p style="text-align: center;"><b>2</b><br/><b>E-sc</b></p> |              |              |              |
| 8                                                                                                                                               | -1.438118000 | 2.337519000  | -0.366274000 | 8                                                                                                                                                | 1.727904000  | -2.260600000 | -0.336503000 |
| 7                                                                                                                                               | -2.360303000 | 0.285967000  | -0.295516000 | 7                                                                                                                                                | 2.485781000  | -0.122761000 | -0.310236000 |
| 7                                                                                                                                               | -2.223324000 | -0.972591000 | 0.314523000  | 7                                                                                                                                                | 2.418317000  | 1.039342000  | 0.483861000  |
| 6                                                                                                                                               | 0.463937000  | -0.677231000 | -0.781214000 | 6                                                                                                                                                | -0.387811000 | 0.418277000  | -1.113932000 |
| 6                                                                                                                                               | 1.774789000  | -1.102561000 | -0.752941000 | 6                                                                                                                                                | -1.718687000 | 0.787194000  | -1.119197000 |
| 6                                                                                                                                               | 2.756238000  | -0.314417000 | -0.147391000 | 6                                                                                                                                                | -2.620153000 | 0.159251000  | -0.259457000 |
| 6                                                                                                                                               | 2.413353000  | 0.915065000  | 0.405625000  | 6                                                                                                                                                | -2.181042000 | -0.859792000 | 0.583890000  |
| 6                                                                                                                                               | 1.091593000  | 1.340423000  | 0.346949000  | 6                                                                                                                                                | -0.844478000 | -1.234414000 | 0.560414000  |
| 6                                                                                                                                               | 0.103344000  | 0.551760000  | -0.223408000 | 6                                                                                                                                                | 0.066248000  | -0.587220000 | -0.262040000 |
| 6                                                                                                                                               | -1.271299000 | 1.134534000  | -0.289391000 | 6                                                                                                                                                | 1.477705000  | -1.072440000 | -0.290069000 |
| 6                                                                                                                                               | -3.671496000 | 0.924832000  | -0.295751000 | 6                                                                                                                                                | 3.844742000  | -0.641969000 | -0.410238000 |
| 6                                                                                                                                               | -2.644443000 | -0.959572000 | 1.708303000  | 6                                                                                                                                                | 1.858855000  | 0.874883000  | 1.813240000  |
| 6                                                                                                                                               | -2.867596000 | -2.023852000 | -0.452537000 | 6                                                                                                                                                | 2.021498000  | 2.263299000  | -0.184068000 |
| 1                                                                                                                                               | -0.284718000 | -1.296852000 | -1.254078000 | 1                                                                                                                                                | 0.305365000  | 0.890818000  | -1.798097000 |
| 1                                                                                                                                               | 2.072318000  | -2.045494000 | -1.193103000 | 1                                                                                                                                                | -2.091245000 | 1.552242000  | -1.788024000 |
| 1                                                                                                                                               | 3.155328000  | 1.549098000  | 0.868917000  | 1                                                                                                                                                | -2.864621000 | -1.371127000 | 1.246136000  |
| 1                                                                                                                                               | 0.814537000  | 2.309122000  | 0.743751000  | 1                                                                                                                                                | -0.497686000 | -2.045274000 | 1.189662000  |
| 1                                                                                                                                               | -3.866937000 | 1.455321000  | 0.640411000  | 1                                                                                                                                                | 4.180584000  | -1.064535000 | 0.541696000  |
| 1                                                                                                                                               | -3.710640000 | 1.646692000  | -1.107095000 | 1                                                                                                                                                | 3.877172000  | -1.421373000 | -1.167095000 |

|   |              |              |              |   |              |              |              |
|---|--------------|--------------|--------------|---|--------------|--------------|--------------|
| 1 | -4.434128000 | 0.163753000  | -0.452347000 | 1 | 4.495242000  | 0.184203000  | -0.688601000 |
| 1 | -3.727257000 | -0.811648000 | 1.828292000  | 1 | 2.220621000  | 1.691864000  | 2.440937000  |
| 1 | -2.374253000 | -1.914571000 | 2.159404000  | 1 | 0.760991000  | 0.885307000  | 1.828686000  |
| 1 | -2.114130000 | -0.164523000 | 2.233277000  | 1 | 2.213867000  | -0.065421000 | 2.237343000  |
| 1 | -2.534923000 | -1.967837000 | -1.488603000 | 1 | 0.934803000  | 2.414282000  | -0.209228000 |
| 1 | -2.567380000 | -2.986250000 | -0.035987000 | 1 | 2.469484000  | 3.105384000  | 0.348483000  |
| 1 | -3.965640000 | -1.971559000 | -0.430233000 | 1 | 2.407844000  | 2.254309000  | -1.202526000 |
| 8 | 4.011025000  | -0.828087000 | -0.153155000 | 8 | -3.900848000 | 0.597363000  | -0.323566000 |
| 6 | 5.035586000  | -0.057951000 | 0.439432000  | 6 | -4.853562000 | -0.034649000 | 0.506281000  |
| 1 | 5.152180000  | 0.902164000  | -0.070127000 | 1 | -4.930087000 | -1.100639000 | 0.276632000  |
| 1 | 4.834640000  | 0.114631000  | 1.500170000  | 1 | -4.603840000 | 0.095202000  | 1.562743000  |
| 1 | 5.949097000  | -0.637318000 | 0.333685000  | 1 | -5.803526000 | 0.450065000  | 0.297504000  |

|                                                                                                                                               |              |              |              |                                                                                                                                                |              |              |              |
|-----------------------------------------------------------------------------------------------------------------------------------------------|--------------|--------------|--------------|------------------------------------------------------------------------------------------------------------------------------------------------|--------------|--------------|--------------|
| 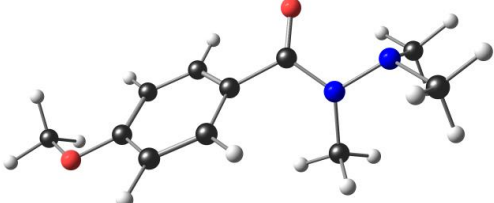 <p style="text-align: center;"><b>2</b><br/><b>Z-ac</b></p> |              |              |              |  <p style="text-align: center;"><b>2</b><br/><b>Z-sc</b></p> |              |              |              |
| 8                                                                                                                                             | 1.446398000  | -1.771562000 | -0.755273000 | 8                                                                                                                                              | -1.605695000 | -1.583172000 | 0.531974000  |
| 7                                                                                                                                             | 2.088851000  | 0.260657000  | 0.042737000  | 7                                                                                                                                              | -2.103064000 | 0.485689000  | -0.247381000 |
| 7                                                                                                                                             | 3.417980000  | -0.076000000 | -0.277663000 | 7                                                                                                                                              | -3.485815000 | 0.318578000  | -0.040218000 |
| 6                                                                                                                                             | -0.745823000 | 1.015031000  | -0.450699000 | 6                                                                                                                                              | 0.760526000  | 1.052055000  | 0.470774000  |
| 6                                                                                                                                             | -2.091541000 | 1.313777000  | -0.395852000 | 6                                                                                                                                              | 2.123676000  | 1.262688000  | 0.496839000  |
| 6                                                                                                                                             | -3.014856000 | 0.319255000  | -0.067263000 | 6                                                                                                                                              | 2.996027000  | 0.241699000  | 0.114614000  |
| 6                                                                                                                                             | -2.576834000 | -0.978212000 | 0.185510000  | 6                                                                                                                                              | 2.488324000  | -0.996323000 | -0.270601000 |
| 6                                                                                                                                             | -1.220176000 | -1.265731000 | 0.108553000  | 6                                                                                                                                              | 1.113970000  | -1.198644000 | -0.270354000 |
| 6                                                                                                                                             | -0.291978000 | -0.279006000 | -0.188574000 | 6                                                                                                                                              | 0.238141000  | -0.181114000 | 0.076559000  |
| 6                                                                                                                                             | 1.144821000  | -0.681250000 | -0.320187000 | 6                                                                                                                                              | -1.225134000 | -0.499685000 | 0.123903000  |
| 6                                                                                                                                             | 1.885109000  | 1.224274000  | 1.120943000  | 6                                                                                                                                              | -1.806191000 | 1.592451000  | -1.141634000 |
| 6                                                                                                                                             | 4.195702000  | 1.103041000  | -0.601684000 | 6                                                                                                                                              | -3.827114000 | 0.159349000  | 1.367235000  |
| 6                                                                                                                                             | 4.043753000  | -0.918293000 | 0.729548000  | 6                                                                                                                                              | -4.065716000 | -0.716891000 | -0.891578000 |
| 1                                                                                                                                             | -0.037939000 | 1.790096000  | -0.720393000 | 1                                                                                                                                              | 0.092636000  | 1.847728000  | 0.779557000  |
| 1                                                                                                                                             | -2.460139000 | 2.308328000  | -0.610936000 | 1                                                                                                                                              | 2.543793000  | 2.207636000  | 0.816134000  |
| 1                                                                                                                                             | -3.274313000 | -1.766687000 | 0.428670000  | 1                                                                                                                                              | 3.144111000  | -1.804980000 | -0.559043000 |
| 1                                                                                                                                             | -0.866206000 | -2.276387000 | 0.270336000  | 1                                                                                                                                              | 0.706666000  | -2.166755000 | -0.534595000 |
| 1                                                                                                                                             | 1.997391000  | 2.250539000  | 0.763802000  | 1                                                                                                                                              | -1.954595000 | 2.549707000  | -0.637579000 |
| 1                                                                                                                                             | 0.893851000  | 1.108028000  | 1.548383000  | 1                                                                                                                                              | -0.786138000 | 1.525399000  | -1.508086000 |
| 1                                                                                                                                             | 2.617444000  | 1.051341000  | 1.912407000  | 1                                                                                                                                              | -2.488316000 | 1.545498000  | -1.992697000 |
| 1                                                                                                                                             | 4.394858000  | 1.751833000  | 0.265592000  | 1                                                                                                                                              | -3.364105000 | 0.966985000  | 1.933954000  |
| 1                                                                                                                                             | 5.153710000  | 0.776082000  | -1.006238000 | 1                                                                                                                                              | -4.910358000 | 0.251109000  | 1.457966000  |
| 1                                                                                                                                             | 3.673343000  | 1.678460000  | -1.365859000 | 1                                                                                                                                              | -3.508951000 | -0.803583000 | 1.777767000  |
| 1                                                                                                                                             | 3.418183000  | -1.795115000 | 0.887273000  | 1                                                                                                                                              | -3.761386000 | -1.724879000 | -0.597595000 |
| 1                                                                                                                                             | 5.008638000  | -1.248404000 | 0.343949000  | 1                                                                                                                                              | -5.151543000 | -0.629371000 | -0.833180000 |
| 1                                                                                                                                             | 4.216706000  | -0.403354000 | 1.686464000  | 1                                                                                                                                              | -3.766594000 | -0.535036000 | -1.924917000 |
| 8                                                                                                                                             | -4.311743000 | 0.709262000  | -0.027708000 | 8                                                                                                                                              | 4.314952000  | 0.547967000  | 0.158228000  |
| 6                                                                                                                                             | -5.282138000 | -0.269201000 | 0.283258000  | 6                                                                                                                                              | 5.235615000  | -0.459212000 | -0.207698000 |
| 1                                                                                                                                             | -5.279152000 | -1.074754000 | -0.455769000 | 1                                                                                                                                              | 5.152914000  | -1.326449000 | 0.452617000  |
| 1                                                                                                                                             | -5.115949000 | -0.686730000 | 1.279828000  | 1                                                                                                                                              | 5.084467000  | -0.772555000 | -1.244109000 |
| 1                                                                                                                                             | -6.241714000 | 0.240408000  | 0.259502000  | 1                                                                                                                                              | 6.222765000  | -0.016914000 | -0.102970000 |



|                                                                                                                                               |              |              |              |                                                                                                                                                |              |              |              |
|-----------------------------------------------------------------------------------------------------------------------------------------------|--------------|--------------|--------------|------------------------------------------------------------------------------------------------------------------------------------------------|--------------|--------------|--------------|
| 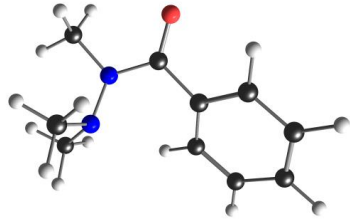 <p style="text-align: center;"><b>3</b><br/><b>E-ac</b></p> |              |              |              |  <p style="text-align: center;"><b>3</b><br/><b>E-sc</b></p> |              |              |              |
| 8                                                                                                                                             | -0.426970000 | 2.320960000  | -0.424774000 | 8                                                                                                                                              | -0.814673000 | -2.290511000 | -0.370696000 |
| 7                                                                                                                                             | -1.540003000 | 0.364447000  | -0.343197000 | 7                                                                                                                                              | -1.714780000 | -0.210018000 | -0.339095000 |
| 7                                                                                                                                             | -1.542876000 | -0.885018000 | 0.299658000  | 7                                                                                                                                              | -1.737878000 | 0.977846000  | 0.414008000  |
| 6                                                                                                                                             | 1.205189000  | -0.831139000 | -0.732562000 | 6                                                                                                                                              | 1.611693000  | -1.066000000 | 0.731614000  |
| 6                                                                                                                                             | 2.474084000  | -1.380240000 | -0.629314000 | 6                                                                                                                                              | 2.912202000  | -0.594135000 | 0.813257000  |
| 6                                                                                                                                             | 3.470023000  | -0.709251000 | 0.070888000  | 6                                                                                                                                              | 3.343912000  | 0.408263000  | -0.048739000 |
| 6                                                                                                                                             | 3.200440000  | 0.524468000  | 0.647141000  | 6                                                                                                                                              | 2.474475000  | 0.931986000  | -0.995415000 |
| 6                                                                                                                                             | 1.937723000  | 1.086645000  | 0.521649000  | 6                                                                                                                                              | 1.164077000  | 0.475353000  | -1.062735000 |
| 6                                                                                                                                             | 0.930541000  | 0.404398000  | -0.153114000 | 6                                                                                                                                              | 0.726621000  | -0.513464000 | -0.190010000 |
| 6                                                                                                                                             | -0.382361000 | 1.111958000  | -0.304964000 | 6                                                                                                                                              | -0.651984000 | -1.089353000 | -0.290853000 |
| 6                                                                                                                                             | -2.788645000 | 1.113276000  | -0.429320000 | 6                                                                                                                                              | -3.037508000 | -0.805328000 | -0.486789000 |
| 6                                                                                                                                             | -2.026277000 | -0.799174000 | 1.670262000  | 6                                                                                                                                              | -1.413314000 | 2.201400000  | -0.292204000 |
| 6                                                                                                                                             | -2.240330000 | -1.895843000 | -0.475240000 | 6                                                                                                                                              | -1.203564000 | 0.901921000  | 1.761826000  |
| 1                                                                                                                                             | 0.430532000  | -1.355371000 | -1.275326000 | 1                                                                                                                                              | 1.267715000  | -1.866439000 | 1.375443000  |
| 1                                                                                                                                             | 2.686682000  | -2.334745000 | -1.094289000 | 1                                                                                                                                              | 3.595054000  | -1.013650000 | 1.541393000  |
| 1                                                                                                                                             | 4.457295000  | -1.145631000 | 0.160277000  | 1                                                                                                                                              | 4.362692000  | 0.770536000  | 0.009430000  |
| 1                                                                                                                                             | 3.976698000  | 1.054416000  | 1.184718000  | 1                                                                                                                                              | 2.817717000  | 1.692199000  | -1.685985000 |
| 1                                                                                                                                             | 1.717780000  | 2.063585000  | 0.933679000  | 1                                                                                                                                              | 0.484387000  | 0.867220000  | -1.808924000 |
| 1                                                                                                                                             | -2.996161000 | 1.666676000  | 0.490761000  | 1                                                                                                                                              | -3.719904000 | -0.022710000 | -0.811251000 |
| 1                                                                                                                                             | -2.712418000 | 1.828235000  | -1.244026000 | 1                                                                                                                                              | -2.992110000 | -1.599917000 | -1.226667000 |
| 1                                                                                                                                             | -3.602831000 | 0.419609000  | -0.631854000 | 1                                                                                                                                              | -3.390995000 | -1.225655000 | 0.459522000  |
| 1                                                                                                                                             | -3.096015000 | -0.553296000 | 1.733990000  | 1                                                                                                                                              | -1.791674000 | 2.135089000  | -1.311636000 |
| 1                                                                                                                                             | -1.864379000 | -1.762896000 | 2.153455000  | 1                                                                                                                                              | -1.915884000 | 3.030821000  | 0.210352000  |
| 1                                                                                                                                             | -1.452221000 | -0.041602000 | 2.204585000  | 1                                                                                                                                              | -0.338106000 | 2.418910000  | -0.317325000 |
| 1                                                                                                                                             | -1.853316000 | -1.898946000 | -1.493668000 | 1                                                                                                                                              | -0.111875000 | 1.009806000  | 1.807017000  |
| 1                                                                                                                                             | -2.049256000 | -2.868923000 | -0.021275000 | 1                                                                                                                                              | -1.653451000 | 1.702023000  | 2.353435000  |
| 1                                                                                                                                             | -3.328804000 | -1.745379000 | -0.510611000 | 1                                                                                                                                              | -1.487234000 | -0.052798000 | 2.206659000  |

|                                                                                                                                                 |              |              |              |                                                                                                                                                  |              |              |              |
|-------------------------------------------------------------------------------------------------------------------------------------------------|--------------|--------------|--------------|--------------------------------------------------------------------------------------------------------------------------------------------------|--------------|--------------|--------------|
| 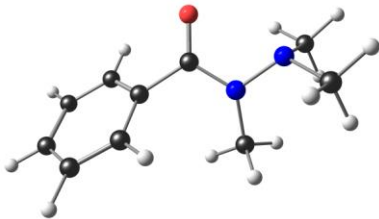 <p style="text-align: center;"><b>3</b><br/><b>Z-ac</b></p> |              |              |              |  <p style="text-align: center;"><b>3</b><br/><b>Z-sc</b></p> |              |              |              |
| 8                                                                                                                                               | 0.575032000  | -1.741267000 | -0.800872000 | 8                                                                                                                                                | 0.810477000  | 1.565897000  | -0.564527000 |
| 7                                                                                                                                               | 1.272749000  | 0.257031000  | 0.035970000  | 7                                                                                                                                                | 1.279158000  | -0.497653000 | 0.246116000  |
| 7                                                                                                                                               | 2.590122000  | -0.093540000 | -0.315269000 | 7                                                                                                                                                | 2.663523000  | -0.358818000 | 0.029138000  |
| 6                                                                                                                                               | -1.562480000 | 1.049390000  | -0.425499000 | 6                                                                                                                                                | -1.894666000 | 1.238524000  | 0.357868000  |
| 6                                                                                                                                               | -2.909165000 | 1.366296000  | -0.318083000 | 6                                                                                                                                                | -3.268677000 | 1.049808000  | 0.376543000  |
| 6                                                                                                                                               | -3.820224000 | 0.397977000  | 0.084304000  | 6                                                                                                                                                | -3.810837000 | -0.156655000 | -0.048867000 |
| 6                                                                                                                                               | -3.385741000 | -0.892765000 | 0.359448000  | 6                                                                                                                                                | -2.976280000 | -1.174494000 | -0.492710000 |
| 6                                                                                                                                               | -2.042560000 | -1.214647000 | 0.232863000  | 6                                                                                                                                                | -1.600364000 | -0.993995000 | -0.490911000 |
| 6                                                                                                                                               | -1.123291000 | -0.240522000 | -0.141781000 | 6                                                                                                                                                | -1.054697000 | 0.211004000  | -0.058036000 |
| 6                                                                                                                                               | 0.307892000  | -0.659482000 | -0.325914000 | 6                                                                                                                                                | 0.418675000  | 0.497343000  | -0.130752000 |
| 6                                                                                                                                               | 1.100408000  | 1.223087000  | 1.117271000  | 6                                                                                                                                                | 0.963411000  | -1.603242000 | 1.135458000  |
| 6                                                                                                                                               | 3.379406000  | 1.078653000  | -0.637289000 | 6                                                                                                                                                | 3.265114000  | 0.676310000  | 0.865872000  |
| 6                                                                                                                                               | 3.219428000  | -0.958960000 | 0.670001000  | 6                                                                                                                                                | 2.999264000  | -0.221770000 | -1.382557000 |

|   |              |              |              |   |              |              |              |
|---|--------------|--------------|--------------|---|--------------|--------------|--------------|
| 1 | -0.850754000 | 1.800839000  | -0.747614000 | 1 | -1.456056000 | 2.183781000  | 0.652645000  |
| 1 | -3.248710000 | 2.367086000  | -0.553504000 | 1 | -3.918588000 | 1.847600000  | 0.713285000  |
| 1 | -4.870274000 | 0.646864000  | 0.174393000  | 1 | -4.884016000 | -0.301066000 | -0.043529000 |
| 1 | -4.096194000 | -1.651063000 | 0.663785000  | 1 | -3.396959000 | -2.107983000 | -0.845060000 |
| 1 | -1.687747000 | -2.222250000 | 0.410299000  | 1 | -0.948152000 | -1.785210000 | -0.842476000 |
| 1 | 1.218303000  | 2.247577000  | 0.757211000  | 1 | 1.640473000  | -1.566502000 | 1.990842000  |
| 1 | 0.115913000  | 1.119178000  | 1.562893000  | 1 | -0.058434000 | -1.526267000 | 1.494714000  |
| 1 | 1.845399000  | 1.041056000  | 1.894593000  | 1 | 1.104557000  | -2.559636000 | 0.627944000  |
| 1 | 3.605916000  | 1.711095000  | 0.235216000  | 1 | 2.972715000  | 0.507483000  | 1.903291000  |
| 1 | 4.323765000  | 0.743156000  | -1.066017000 | 1 | 4.348920000  | 0.573215000  | 0.798362000  |
| 1 | 2.851064000  | 1.673521000  | -1.382232000 | 1 | 2.972488000  | 1.685847000  | 0.565195000  |
| 1 | 2.587867000  | -1.833228000 | 0.818621000  | 1 | 2.694528000  | 0.741278000  | -1.802686000 |
| 1 | 4.177402000  | -1.290071000 | 0.268587000  | 1 | 4.080240000  | -0.332742000 | -1.477733000 |
| 1 | 3.405667000  | -0.462207000 | 1.633909000  | 1 | 2.520053000  | -1.028680000 | -1.936795000 |

|                                                                                                                                               |              |              |              |                                                                                                                                                |              |              |              |
|-----------------------------------------------------------------------------------------------------------------------------------------------|--------------|--------------|--------------|------------------------------------------------------------------------------------------------------------------------------------------------|--------------|--------------|--------------|
| 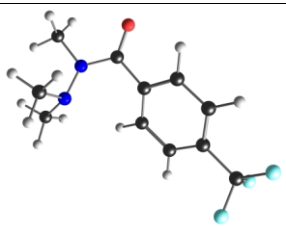 <p style="text-align: center;"><b>4</b><br/><b>E-ac</b></p> |              |              |              |  <p style="text-align: center;"><b>4</b><br/><b>E-sc</b></p> |              |              |              |
| 8                                                                                                                                             | 2.227602000  | -2.318484000 | -0.399334000 | 8                                                                                                                                              | 2.455204000  | -2.230288000 | -0.365462000 |
| 7                                                                                                                                             | 2.943054000  | -0.183742000 | -0.311899000 | 7                                                                                                                                              | 3.045274000  | -0.041591000 | -0.303719000 |
| 7                                                                                                                                             | 2.675499000  | 1.056703000  | 0.291754000  | 7                                                                                                                                              | 2.861731000  | 1.151708000  | 0.415123000  |
| 6                                                                                                                                             | 0.024039000  | 0.448837000  | -0.798831000 | 6                                                                                                                                              | 0.104432000  | 0.184774000  | -1.119349000 |
| 6                                                                                                                                             | -1.326123000 | 0.738128000  | -0.728852000 | 6                                                                                                                                              | -1.258981000 | 0.448965000  | -1.075828000 |
| 6                                                                                                                                             | -2.176941000 | -0.106521000 | -0.023257000 | 6                                                                                                                                              | -2.040947000 | -0.168039000 | -0.113779000 |
| 6                                                                                                                                             | -1.691140000 | -1.248764000 | 0.590007000  | 6                                                                                                                                              | -1.482873000 | -1.069766000 | 0.787124000  |
| 6                                                                                                                                             | -0.338986000 | -1.548884000 | 0.493496000  | 6                                                                                                                                              | -0.129240000 | -1.345002000 | 0.725968000  |
| 6                                                                                                                                             | 0.523880000  | -0.696948000 | -0.182811000 | 6                                                                                                                                              | 0.672972000  | -0.696447000 | -0.210244000 |
| 6                                                                                                                                             | 1.954907000  | -1.139115000 | -0.295427000 | 6                                                                                                                                              | 2.125211000  | -1.064654000 | -0.284301000 |
| 6                                                                                                                                             | 4.316749000  | -0.674037000 | -0.351808000 | 6                                                                                                                                              | 4.446351000  | -0.430701000 | -0.413729000 |
| 6                                                                                                                                             | 3.123709000  | 1.101527000  | 1.677197000  | 6                                                                                                                                              | 2.309448000  | 1.028575000  | 1.752037000  |
| 6                                                                                                                                             | 3.185536000  | 2.166682000  | -0.495098000 | 6                                                                                                                                              | 2.380886000  | 2.295071000  | -0.335059000 |
| 1                                                                                                                                             | 0.690171000  | 1.105515000  | -1.340796000 | 1                                                                                                                                              | 0.723320000  | 0.648578000  | -1.876568000 |
| 1                                                                                                                                             | -1.724818000 | 1.620413000  | -1.214443000 | 1                                                                                                                                              | -1.710692000 | 1.125998000  | -1.788664000 |
| 1                                                                                                                                             | -2.362572000 | -1.902472000 | 1.130051000  | 1                                                                                                                                              | -2.112489000 | -1.559011000 | 1.519904000  |
| 1                                                                                                                                             | 0.060223000  | -2.454105000 | 0.932610000  | 1                                                                                                                                              | 0.320307000  | -2.065061000 | 1.398403000  |
| 1                                                                                                                                             | 4.594784000  | -1.177181000 | 0.578180000  | 1                                                                                                                                              | 4.831030000  | -0.795176000 | 0.543182000  |
| 1                                                                                                                                             | 4.409928000  | -1.389482000 | -1.164365000 | 1                                                                                                                                              | 4.542953000  | -1.220888000 | -1.153380000 |
| 1                                                                                                                                             | 4.986395000  | 0.165261000  | -0.530236000 | 1                                                                                                                                              | 5.011311000  | 0.446985000  | -0.719431000 |
| 1                                                                                                                                             | 4.217471000  | 1.059727000  | 1.774809000  | 1                                                                                                                                              | 2.617944000  | 1.900401000  | 2.332343000  |
| 1                                                                                                                                             | 2.771607000  | 2.032260000  | 2.121891000  | 1                                                                                                                                              | 1.213102000  | 0.973996000  | 1.769278000  |
| 1                                                                                                                                             | 2.682341000  | 0.266803000  | 2.222558000  | 1                                                                                                                                              | 2.720095000  | 0.137730000  | 2.228921000  |
| 1                                                                                                                                             | 2.846445000  | 2.063304000  | -1.525325000 | 1                                                                                                                                              | 1.286272000  | 2.348696000  | -0.394211000 |
| 1                                                                                                                                             | 2.784384000  | 3.092678000  | -0.081914000 | 1                                                                                                                                              | 2.738346000  | 3.202942000  | 0.155483000  |
| 1                                                                                                                                             | 4.282133000  | 2.238356000  | -0.489115000 | 1                                                                                                                                              | 2.795286000  | 2.260454000  | -1.341953000 |
| 6                                                                                                                                             | -3.633549000 | 0.244802000  | 0.037825000  | 6                                                                                                                                              | -3.504134000 | 0.143995000  | -0.002792000 |
| 9                                                                                                                                             | -4.199041000 | 0.223260000  | -1.178406000 | 9                                                                                                                                              | -4.239713000 | -0.964351000 | 0.148570000  |
| 9                                                                                                                                             | -4.328965000 | -0.593852000 | 0.811549000  | 9                                                                                                                                              | -3.758721000 | 0.919579000  | 1.062729000  |
| 9                                                                                                                                             | -3.823291000 | 1.481907000  | 0.520983000  | 9                                                                                                                                              | -3.968922000 | 0.789797000  | -1.076824000 |

|                                                                                   |              |              |              |                                                                                    |              |              |              |
|-----------------------------------------------------------------------------------|--------------|--------------|--------------|------------------------------------------------------------------------------------|--------------|--------------|--------------|
| 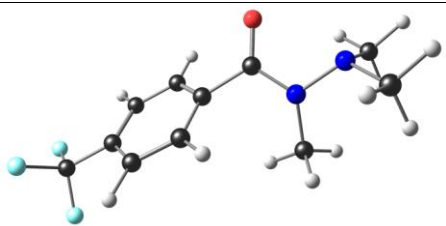 |              |              |              |  |              |              |              |
| <b>4</b>                                                                          |              |              |              | <b>4</b>                                                                           |              |              |              |
| <b>Z-ac</b>                                                                       |              |              |              | <b>Z-sc</b>                                                                        |              |              |              |
| 8                                                                                 | -2.180029000 | 1.772137000  | -0.782566000 | 8                                                                                  | 2.291522000  | -1.563863000 | -0.572513000 |
| 7                                                                                 | -2.676307000 | -0.293616000 | 0.036443000  | 7                                                                                  | 2.694325000  | 0.511888000  | 0.246663000  |
| 7                                                                                 | -4.026950000 | -0.060090000 | -0.286463000 | 7                                                                                  | 4.081796000  | 0.423863000  | 0.022569000  |
| 6                                                                                 | 0.214555000  | -0.807180000 | -0.500517000 | 6                                                                                  | -0.207126000 | 0.900587000  | -0.479540000 |
| 6                                                                                 | 1.584208000  | -0.992290000 | -0.433219000 | 6                                                                                  | -1.589297000 | 1.030338000  | -0.477095000 |
| 6                                                                                 | 2.399029000  | 0.058455000  | -0.027701000 | 6                                                                                  | -2.370331000 | -0.023237000 | -0.030435000 |
| 6                                                                                 | 1.857867000  | 1.294729000  | 0.287894000  | 6                                                                                  | -1.786680000 | -1.212925000 | 0.390583000  |
| 6                                                                                 | 0.485703000  | 1.480640000  | 0.197799000  | 6                                                                                  | -0.409922000 | -1.344569000 | 0.365764000  |
| 6                                                                                 | -0.340289000 | 0.429213000  | -0.177007000 | 6                                                                                  | 0.385819000  | -0.280581000 | -0.050539000 |
| 6                                                                                 | -1.810930000 | 0.713017000  | -0.326639000 | 6                                                                                  | 1.871075000  | -0.510802000 | -0.129770000 |
| 6                                                                                 | -2.395843000 | -1.251725000 | 1.103026000  | 6                                                                                  | 2.341889000  | 1.606349000  | 1.136830000  |
| 6                                                                                 | -4.714123000 | -1.295687000 | -0.606660000 | 6                                                                                  | 4.415468000  | 0.299247000  | -1.391134000 |
| 6                                                                                 | -4.711560000 | 0.737091000  | 0.719743000  | 6                                                                                  | 4.723037000  | -0.589373000 | 0.857126000  |
| 1                                                                                 | -0.427807000 | -1.619028000 | -0.819828000 | 1                                                                                  | 0.409583000  | 1.719368000  | -0.830360000 |
| 1                                                                                 | 2.024370000  | -1.946822000 | -0.694904000 | 1                                                                                  | -2.055637000 | 1.944118000  | -0.819933000 |
| 1                                                                                 | 2.504343000  | 2.106276000  | 0.593386000  | 1                                                                                  | -2.412006000 | -2.030470000 | 0.727936000  |
| 1                                                                                 | 0.040259000  | 2.445418000  | 0.404439000  | 1                                                                                  | 0.066894000  | -2.272127000 | 0.655758000  |
| 1                                                                                 | -2.453995000 | -2.278735000 | 0.736601000  | 1                                                                                  | 2.446025000  | 2.566200000  | 0.627401000  |
| 1                                                                                 | -1.406365000 | -1.081886000 | 1.516139000  | 1                                                                                  | 1.325995000  | 1.492933000  | 1.503547000  |
| 1                                                                                 | -3.123043000 | -1.127551000 | 1.908061000  | 1                                                                                  | 3.024329000  | 1.594844000  | 1.988347000  |
| 1                                                                                 | -4.870430000 | -1.951154000 | 0.263609000  | 1                                                                                  | 3.905610000  | 1.088733000  | -1.943030000 |
| 1                                                                                 | -5.690530000 | -1.041536000 | -1.018866000 | 1                                                                                  | 5.491027000  | 0.450025000  | -1.490354000 |
| 1                                                                                 | -4.147817000 | -1.835932000 | -1.365137000 | 1                                                                                  | 4.145137000  | -0.674250000 | -1.810503000 |
| 1                                                                                 | -4.165539000 | 1.668742000  | 0.857879000  | 1                                                                                  | 4.457480000  | -1.608386000 | 0.563401000  |
| 1                                                                                 | -5.706664000 | 0.973864000  | 0.343152000  | 1                                                                                  | 5.802195000  | -0.454404000 | 0.776200000  |
| 1                                                                                 | -4.824511000 | 0.221101000  | 1.684604000  | 1                                                                                  | 4.438480000  | -0.424558000 | 1.897324000  |
| 6                                                                                 | 3.878209000  | -0.181401000 | 0.047642000  | 6                                                                                  | -3.867048000 | 0.080001000  | -0.015003000 |
| 9                                                                                 | 4.389346000  | -0.496825000 | -1.150820000 | 9                                                                                  | -4.428787000 | -0.751052000 | -0.904257000 |
| 9                                                                                 | 4.545649000  | 0.885212000  | 0.495706000  | 9                                                                                  | -4.370638000 | -0.246859000 | 1.183434000  |
| 9                                                                                 | 4.168315000  | -1.204349000 | 0.865710000  | 9                                                                                  | -4.295180000 | 1.313290000  | -0.302618000 |

|                                                                                     |              |              |              |                                                                                      |              |              |              |
|-------------------------------------------------------------------------------------|--------------|--------------|--------------|--------------------------------------------------------------------------------------|--------------|--------------|--------------|
| 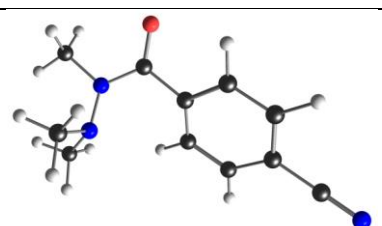 |              |              |              |  |              |              |              |
| <b>5</b>                                                                            |              |              |              | <b>5</b>                                                                             |              |              |              |
| <b>E-ac</b>                                                                         |              |              |              | <b>E-sc</b>                                                                          |              |              |              |
| 8                                                                                   | 1.394503000  | -2.318570000 | -0.397100000 | 8                                                                                    | 1.673947000  | -2.234412000 | -0.365335000 |
| 7                                                                                   | 2.208651000  | -0.219664000 | -0.305764000 | 7                                                                                    | 2.336538000  | -0.065058000 | -0.323669000 |
| 7                                                                                   | 1.996592000  | 1.034664000  | 0.291037000  | 7                                                                                    | 2.207854000  | 1.129083000  | 0.406251000  |
| 6                                                                                   | -0.680004000 | 0.544968000  | -0.792128000 | 6                                                                                    | -0.606964000 | 0.248384000  | -1.096314000 |
| 6                                                                                   | -2.015832000 | 0.896951000  | -0.723595000 | 6                                                                                    | -1.959830000 | 0.545777000  | -1.046573000 |
| 6                                                                                   | -2.907897000 | 0.088941000  | -0.017841000 | 6                                                                                    | -2.757709000 | -0.049190000 | -0.072308000 |
| 6                                                                                   | -2.466248000 | -1.080884000 | 0.596006000  | 6                                                                                    | -2.210347000 | -0.961637000 | 0.831654000  |
| 6                                                                                   | -1.131951000 | -1.437440000 | 0.498512000  | 6                                                                                    | -0.863929000 | -1.267920000 | 0.759078000  |
| 6                                                                                   | -0.231459000 | -0.621076000 | -0.177681000 | 6                                                                                    | -0.053840000 | -0.644989000 | -0.186351000 |
| 6                                                                                   | 1.178767000  | -1.127648000 | -0.291157000 | 6                                                                                    | 1.385631000  | -1.058385000 | -0.281077000 |

|   |              |              |              |   |              |              |              |
|---|--------------|--------------|--------------|---|--------------|--------------|--------------|
| 6 | 3.558908000  | -0.771794000 | -0.347198000 | 6 | 3.721620000  | -0.498989000 | -0.466395000 |
| 6 | 2.447722000  | 1.066382000  | 1.676275000  | 6 | 1.702439000  | 1.008149000  | 1.761659000  |
| 6 | 2.556342000  | 2.116822000  | -0.501499000 | 6 | 1.727095000  | 2.288385000  | -0.319203000 |
| 1 | 0.013727000  | 1.172594000  | -1.333622000 | 1 | 0.018731000  | 0.693991000  | -1.858802000 |
| 1 | -2.376836000 | 1.794363000  | -1.208405000 | 1 | -2.402120000 | 1.231757000  | -1.757139000 |
| 1 | -3.169114000 | -1.704515000 | 1.132293000  | 1 | -2.846341000 | -1.427292000 | 1.572877000  |
| 1 | -0.771773000 | -2.360162000 | 0.934974000  | 1 | -0.427201000 | -1.995212000 | 1.432197000  |
| 1 | 3.810882000  | -1.294549000 | 0.579249000  | 1 | 4.117101000  | -0.875081000 | 0.481522000  |
| 1 | 3.621618000  | -1.483869000 | -1.165755000 | 1 | 3.774976000  | -1.292582000 | -1.206921000 |
| 1 | 4.266735000  | 0.037273000  | -0.516685000 | 1 | 4.306571000  | 0.360179000  | -0.786590000 |
| 1 | 3.538799000  | 0.978533000  | 1.773022000  | 1 | 2.120192000  | 0.111573000  | 2.221343000  |
| 1 | 2.135922000  | 2.013036000  | 2.117374000  | 1 | 2.041092000  | 1.874617000  | 2.332928000  |
| 1 | 1.971991000  | 0.253441000  | 2.225517000  | 1 | 0.606778000  | 0.966119000  | 1.818868000  |
| 1 | 2.215904000  | 2.021727000  | -1.532080000 | 1 | 0.632587000  | 2.366683000  | -0.341084000 |
| 1 | 2.194470000  | 3.061794000  | -0.095021000 | 1 | 2.120961000  | 3.184073000  | 0.165537000  |
| 1 | 3.654885000  | 2.140883000  | -0.492618000 | 1 | 2.107015000  | 2.253003000  | -1.339534000 |
| 6 | -4.293468000 | 0.464702000  | 0.067278000  | 6 | -4.158464000 | 0.269978000  | -0.005663000 |
| 7 | -5.398459000 | 0.767638000  | 0.134259000  | 7 | -5.275268000 | 0.528273000  | 0.048339000  |

|                                                                                                                                               |              |              |              |                                                                                                                                                |              |              |              |
|-----------------------------------------------------------------------------------------------------------------------------------------------|--------------|--------------|--------------|------------------------------------------------------------------------------------------------------------------------------------------------|--------------|--------------|--------------|
| 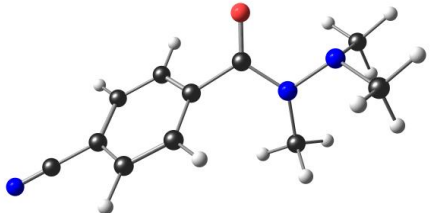 <p style="text-align: center;"><b>5</b><br/><b>Z-ac</b></p> |              |              |              |  <p style="text-align: center;"><b>5</b><br/><b>Z-sc</b></p> |              |              |              |
| 8                                                                                                                                             | -1.350057000 | 1.757697000  | -0.780704000 | 8                                                                                                                                              | -1.509104000 | 1.561035000  | -0.570360000 |
| 7                                                                                                                                             | -1.913561000 | -0.290164000 | 0.040698000  | 7                                                                                                                                              | -1.923099000 | -0.513215000 | 0.248437000  |
| 7                                                                                                                                             | -3.255160000 | -0.018191000 | -0.290465000 | 7                                                                                                                                              | -3.310137000 | -0.419146000 | 0.024425000  |
| 6                                                                                                                                             | 0.965142000  | -0.887808000 | -0.479579000 | 6                                                                                                                                              | 0.976364000  | -0.917284000 | -0.482409000 |
| 6                                                                                                                                             | 2.329310000  | -1.113826000 | -0.410432000 | 6                                                                                                                                              | 2.354218000  | -1.053187000 | -0.484714000 |
| 6                                                                                                                                             | 3.176530000  | -0.082096000 | -0.008665000 | 6                                                                                                                                              | 3.148844000  | 0.001498000  | -0.038247000 |
| 6                                                                                                                                             | 2.661468000  | 1.176360000  | 0.301170000  | 6                                                                                                                                              | 2.566323000  | 1.195334000  | 0.386682000  |
| 6                                                                                                                                             | 1.298574000  | 1.396462000  | 0.208456000  | 6                                                                                                                                              | 1.189115000  | 1.327861000  | 0.364615000  |
| 6                                                                                                                                             | 0.444201000  | 0.363353000  | -0.162838000 | 6                                                                                                                                              | 0.388998000  | 0.268030000  | -0.049752000 |
| 6                                                                                                                                             | -1.017601000 | 0.688808000  | -0.319803000 | 6                                                                                                                                              | -1.095837000 | 0.505280000  | -0.127749000 |
| 6                                                                                                                                             | -1.665704000 | -1.259613000 | 1.105188000  | 6                                                                                                                                              | -1.574434000 | -1.610868000 | 1.136341000  |
| 6                                                                                                                                             | -3.975004000 | -1.234020000 | -0.615459000 | 6                                                                                                                                              | -3.643223000 | -0.292649000 | -1.389356000 |
| 6                                                                                                                                             | -3.922137000 | 0.797387000  | 0.713022000  | 6                                                                                                                                              | -3.947036000 | 0.596463000  | 0.859563000  |
| 1                                                                                                                                             | 0.301748000  | -1.683208000 | -0.797100000 | 1                                                                                                                                              | 0.354956000  | -1.732381000 | -0.833331000 |
| 1                                                                                                                                             | 2.745020000  | -2.079354000 | -0.666818000 | 1                                                                                                                                              | 2.819813000  | -1.966255000 | -0.831573000 |
| 1                                                                                                                                             | 3.332148000  | 1.970331000  | 0.601960000  | 1                                                                                                                                              | 3.196325000  | 2.009711000  | 0.719248000  |
| 1                                                                                                                                             | 0.877929000  | 2.373621000  | 0.408789000  | 1                                                                                                                                              | 0.716519000  | 2.257430000  | 0.655144000  |
| 1                                                                                                                                             | -1.742747000 | -2.283407000 | 0.733315000  | 1                                                                                                                                              | -1.682790000 | -2.569294000 | 0.625203000  |
| 1                                                                                                                                             | -0.677573000 | -1.113173000 | 1.530502000  | 1                                                                                                                                              | -0.558039000 | -1.502143000 | 1.503401000  |
| 1                                                                                                                                             | -2.398913000 | -1.123009000 | 1.902499000  | 1                                                                                                                                              | -2.256330000 | -1.597990000 | 1.988145000  |
| 1                                                                                                                                             | -4.152910000 | -1.886228000 | 0.253047000  | 1                                                                                                                                              | -3.137690000 | -1.084748000 | -1.941479000 |
| 1                                                                                                                                             | -4.942166000 | -0.951669000 | -1.030957000 | 1                                                                                                                                              | -4.719511000 | -0.437849000 | -1.488308000 |
| 1                                                                                                                                             | -3.421108000 | -1.788372000 | -1.372941000 | 1                                                                                                                                              | -3.368140000 | 0.679562000  | -1.808594000 |
| 1                                                                                                                                             | -3.350722000 | 1.713171000  | 0.854842000  | 1                                                                                                                                              | -3.678341000 | 1.614547000  | 0.565485000  |
| 1                                                                                                                                             | -4.908105000 | 1.062714000  | 0.331660000  | 1                                                                                                                                              | -5.026638000 | 0.465174000  | 0.779421000  |
| 1                                                                                                                                             | -4.054527000 | 0.284210000  | 1.676829000  | 1                                                                                                                                              | -3.662294000 | 0.430709000  | 1.899534000  |
| 6                                                                                                                                             | 4.592439000  | -0.317856000 | 0.081113000  | 6                                                                                                                                              | 4.579775000  | -0.141233000 | -0.024712000 |
| 7                                                                                                                                             | 5.721445000  | -0.508804000 | 0.156478000  | 7                                                                                                                                              | 5.721286000  | -0.257670000 | -0.011574000 |

|                                                                                                                                               |              |              |              |                                                                                                                                                |              |              |              |
|-----------------------------------------------------------------------------------------------------------------------------------------------|--------------|--------------|--------------|------------------------------------------------------------------------------------------------------------------------------------------------|--------------|--------------|--------------|
| 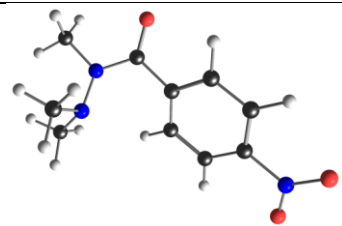 <p style="text-align: center;"><b>6</b><br/><b>E-ac</b></p> |              |              |              |  <p style="text-align: center;"><b>6</b><br/><b>E-sc</b></p> |              |              |              |
| 8                                                                                                                                             | 1.818904000  | -2.293063000 | -0.554625000 | 8                                                                                                                                              | 2.066306000  | 2.182002000  | -0.638425000 |
| 7                                                                                                                                             | 2.588329000  | -0.190418000 | -0.300804000 | 7                                                                                                                                              | 2.704941000  | 0.034641000  | -0.282730000 |
| 7                                                                                                                                             | 2.338742000  | 1.021710000  | 0.363378000  | 7                                                                                                                                              | 2.530840000  | -1.084132000 | 0.546300000  |
| 6                                                                                                                                             | -0.313312000 | 0.541739000  | -0.781433000 | 6                                                                                                                                              | -0.483686000 | 1.394751000  | 0.583141000  |
| 6                                                                                                                                             | -1.656578000 | 0.864739000  | -0.698221000 | 6                                                                                                                                              | -1.834507000 | 1.115819000  | 0.692941000  |
| 6                                                                                                                                             | -2.506221000 | -0.010530000 | -0.042635000 | 6                                                                                                                                              | -2.361486000 | 0.104289000  | -0.093326000 |
| 6                                                                                                                                             | -2.070204000 | -1.201611000 | 0.507595000  | 6                                                                                                                                              | -1.596639000 | -0.623775000 | -0.985805000 |
| 6                                                                                                                                             | -0.726974000 | -1.522504000 | 0.393676000  | 6                                                                                                                                              | -0.240072000 | -0.346232000 | -1.069074000 |
| 6                                                                                                                                             | 0.156508000  | -0.648538000 | -0.231539000 | 6                                                                                                                                              | 0.319454000  | 0.648029000  | -0.275359000 |
| 6                                                                                                                                             | 1.578905000  | -1.117258000 | -0.365897000 | 6                                                                                                                                              | 1.766040000  | 1.029439000  | -0.401845000 |
| 6                                                                                                                                             | 3.951495000  | -0.707448000 | -0.363295000 | 6                                                                                                                                              | 4.101812000  | 0.424612000  | -0.433390000 |
| 6                                                                                                                                             | 2.775110000  | 0.984926000  | 1.753377000  | 6                                                                                                                                              | 2.104931000  | -2.311358000 | -0.097396000 |
| 6                                                                                                                                             | 2.881561000  | 2.160332000  | -0.359470000 | 6                                                                                                                                              | 1.949095000  | -0.849574000 | 1.855272000  |
| 1                                                                                                                                             | 0.369640000  | 1.212761000  | -1.282730000 | 1                                                                                                                                              | -0.037851000 | 2.195334000  | 1.159832000  |
| 1                                                                                                                                             | -2.052030000 | 1.775911000  | -1.123457000 | 1                                                                                                                                              | -2.480299000 | 1.666680000  | 1.361648000  |
| 1                                                                                                                                             | -2.774982000 | -1.856146000 | 0.999767000  | 1                                                                                                                                              | -2.063230000 | -1.383579000 | -1.596404000 |
| 1                                                                                                                                             | -0.348775000 | -2.460518000 | 0.778819000  | 1                                                                                                                                              | 0.381885000  | -0.889297000 | -1.768367000 |
| 1                                                                                                                                             | 4.208805000  | -1.278735000 | 0.532489000  | 1                                                                                                                                              | 4.671897000  | -0.466634000 | -0.686771000 |
| 1                                                                                                                                             | 4.036429000  | -1.367340000 | -1.222555000 | 1                                                                                                                                              | 4.184521000  | 1.165327000  | -1.223820000 |
| 1                                                                                                                                             | 4.641107000  | 0.126665000  | -0.477417000 | 1                                                                                                                                              | 4.491615000  | 0.850864000  | 0.495187000  |
| 1                                                                                                                                             | 3.866585000  | 0.910913000  | 1.856529000  | 1                                                                                                                                              | 2.543131000  | -2.363707000 | -1.093495000 |
| 1                                                                                                                                             | 2.442556000  | 1.900556000  | 2.242108000  | 1                                                                                                                                              | 2.476978000  | -3.154622000 | 0.488229000  |
| 1                                                                                                                                             | 2.308913000  | 0.134961000  | 2.252375000  | 1                                                                                                                                              | 1.014251000  | -2.407211000 | -0.174776000 |
| 1                                                                                                                                             | 2.560174000  | 2.113256000  | -1.399453000 | 1                                                                                                                                              | 0.851289000  | -0.829527000 | 1.850983000  |
| 1                                                                                                                                             | 2.488351000  | 3.071832000  | 0.091583000  | 1                                                                                                                                              | 2.273241000  | -1.651259000 | 2.521769000  |
| 1                                                                                                                                             | 3.978758000  | 2.211858000  | -0.330344000 | 1                                                                                                                                              | 2.323147000  | 0.095499000  | 2.250635000  |
| 7                                                                                                                                             | -3.934845000 | 0.340216000  | 0.066666000  | 7                                                                                                                                              | -3.801291000 | -0.199824000 | 0.015404000  |
| 8                                                                                                                                             | -4.661814000 | -0.442315000 | 0.640700000  | 8                                                                                                                                              | -4.243462000 | -1.076963000 | -0.695586000 |
| 8                                                                                                                                             | -4.293697000 | 1.390426000  | -0.422994000 | 8                                                                                                                                              | -4.450550000 | 0.445128000  | 0.810460000  |

|                                                                                                                                                 |              |              |              |                                                                                                                                                  |              |              |              |
|-------------------------------------------------------------------------------------------------------------------------------------------------|--------------|--------------|--------------|--------------------------------------------------------------------------------------------------------------------------------------------------|--------------|--------------|--------------|
| 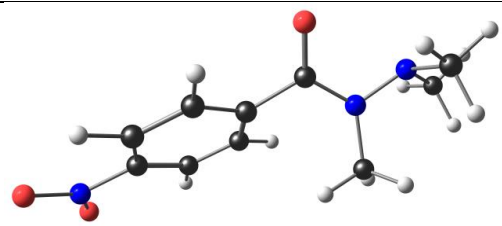 <p style="text-align: center;"><b>6</b><br/><b>Z-ac</b></p> |              |              |              |  <p style="text-align: center;"><b>6</b><br/><b>Z-sc</b></p> |              |              |              |
| 8                                                                                                                                               | 1.767348000  | 1.716546000  | -0.887273000 | 8                                                                                                                                                | -1.908330000 | -1.501254000 | -0.717262000 |
| 7                                                                                                                                               | 2.308343000  | -0.281792000 | 0.061666000  | 7                                                                                                                                                | -2.318815000 | 0.484529000  | 0.298410000  |
| 7                                                                                                                                               | 3.653432000  | -0.045690000 | -0.280802000 | 7                                                                                                                                                | -3.705927000 | 0.416639000  | 0.064586000  |
| 6                                                                                                                                               | -0.883629000 | 1.442280000  | 0.130637000  | 6                                                                                                                                                | 0.785190000  | -1.371993000 | 0.242011000  |
| 6                                                                                                                                               | -2.250824000 | 1.244933000  | 0.229340000  | 6                                                                                                                                                | 2.164350000  | -1.251931000 | 0.275893000  |
| 6                                                                                                                                               | -2.751107000 | -0.020019000 | -0.026301000 | 6                                                                                                                                                | 2.724247000  | -0.025358000 | -0.036308000 |
| 6                                                                                                                                               | -1.942436000 | -1.087245000 | -0.375530000 | 6                                                                                                                                                | 1.963018000  | 1.077901000  | -0.379881000 |
| 6                                                                                                                                               | -0.574983000 | -0.878010000 | -0.449842000 | 6                                                                                                                                                | 0.583743000  | 0.947031000  | -0.389020000 |
| 6                                                                                                                                               | -0.041968000 | 0.381768000  | -0.189884000 | 6                                                                                                                                                | -0.007934000 | -0.272147000 | -0.070494000 |
| 6                                                                                                                                               | 1.424553000  | 0.681767000  | -0.361248000 | 6                                                                                                                                                | -1.494344000 | -0.494771000 | -0.172957000 |
| 6                                                                                                                                               | 2.044068000  | -1.189697000 | 1.175102000  | 6                                                                                                                                                | -1.968385000 | 1.493645000  | 1.285642000  |

|   |              |              |              |   |              |              |              |
|---|--------------|--------------|--------------|---|--------------|--------------|--------------|
| 6 | 4.328343000  | 0.817596000  | 0.676331000  | 6 | -4.346330000 | -0.675988000 | 0.793816000  |
| 6 | 4.359109000  | -1.286712000 | -0.535081000 | 6 | -4.036456000 | 0.429169000  | -1.355439000 |
| 1 | -0.452078000 | 2.422573000  | 0.286534000  | 1 | 0.307156000  | -2.322128000 | 0.442246000  |
| 1 | -2.927250000 | 2.046709000  | 0.488369000  | 1 | 2.804630000  | -2.085268000 | 0.527258000  |
| 1 | -2.386765000 | -2.050329000 | -0.582157000 | 1 | 2.451489000  | 2.007730000  | -0.633509000 |
| 1 | 0.080604000  | -1.694437000 | -0.726949000 | 1 | -0.034098000 | 1.794443000  | -0.660096000 |
| 1 | 2.775759000  | -1.019393000 | 1.967185000  | 1 | -2.653140000 | 1.403060000  | 2.130339000  |
| 1 | 1.056182000  | -1.009295000 | 1.587932000  | 1 | -0.953101000 | 1.348947000  | 1.643505000  |
| 1 | 2.110025000  | -2.232760000 | 0.858799000  | 1 | -2.073423000 | 2.495393000  | 0.865015000  |
| 1 | 4.448651000  | 0.359666000  | 1.669086000  | 1 | -4.045477000 | -0.627876000 | 1.841234000  |
| 1 | 5.319887000  | 1.044525000  | 0.284764000  | 1 | -5.424962000 | -0.523981000 | 0.743430000  |
| 1 | 3.770373000  | 1.748670000  | 0.760717000  | 1 | -4.094972000 | -1.659435000 | 0.387300000  |
| 1 | 3.794660000  | -1.880090000 | -1.254214000 | 1 | -3.757652000 | -0.496769000 | -1.867058000 |
| 1 | 5.326739000  | -1.040862000 | -0.972071000 | 1 | -5.113051000 | 0.580092000  | -1.441236000 |
| 1 | 4.535136000  | -1.886868000 | 0.370494000  | 1 | -3.533097000 | 1.272851000  | -1.827274000 |
| 7 | -4.206959000 | -0.240776000 | 0.071586000  | 7 | 4.193353000  | 0.110757000  | -0.011713000 |
| 8 | -4.621253000 | -1.354712000 | -0.169771000 | 8 | 4.659500000  | 1.193105000  | -0.297638000 |
| 8 | -4.896394000 | 0.704383000  | 0.388695000  | 8 | 4.840933000  | -0.867336000 | 0.293685000  |

|                                                                                                                                                  |              |              |              |                                                                                                                                                   |              |              |              |
|--------------------------------------------------------------------------------------------------------------------------------------------------|--------------|--------------|--------------|---------------------------------------------------------------------------------------------------------------------------------------------------|--------------|--------------|--------------|
| 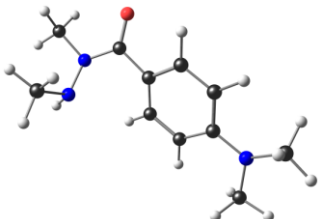 <p style="text-align: center;"><b>7</b><br/><b>E-ac-bH</b></p> |              |              |              |  <p style="text-align: center;"><b>7</b><br/><b>E-ac-fH</b></p> |              |              |              |
| 8                                                                                                                                                | -2.323245000 | 1.998273000  | -0.358590000 | 8                                                                                                                                                 | 2.214514000  | -2.128315000 | -0.486482000 |
| 7                                                                                                                                                | -2.902040000 | -0.173966000 | -0.399603000 | 7                                                                                                                                                 | 2.915844000  | -0.023953000 | -0.087880000 |
| 7                                                                                                                                                | -2.601570000 | -1.416599000 | 0.181430000  | 7                                                                                                                                                 | 2.673152000  | 1.071550000  | 0.756897000  |
| 6                                                                                                                                                | 0.061237000  | -0.653555000 | -0.792148000 | 6                                                                                                                                                 | 0.006640000  | 0.704805000  | -0.405348000 |
| 6                                                                                                                                                | 1.427001000  | -0.859126000 | -0.746944000 | 6                                                                                                                                                 | -1.344519000 | 0.988290000  | -0.346496000 |
| 6                                                                                                                                                | 2.280141000  | 0.070670000  | -0.122904000 | 6                                                                                                                                                 | -2.272394000 | 0.010516000  | 0.058898000  |
| 6                                                                                                                                                | 1.690520000  | 1.213857000  | 0.446296000  | 6                                                                                                                                                 | -1.777330000 | -1.273765000 | 0.348453000  |
| 6                                                                                                                                                | 0.325751000  | 1.415040000  | 0.369721000  | 6                                                                                                                                                 | -0.425592000 | -1.544969000 | 0.259941000  |
| 6                                                                                                                                                | -0.515527000 | 0.483920000  | -0.232915000 | 6                                                                                                                                                 | 0.493135000  | -0.561742000 | -0.095459000 |
| 6                                                                                                                                                | -1.960878000 | 0.835907000  | -0.322282000 | 6                                                                                                                                                 | 1.917052000  | -0.977767000 | -0.224854000 |
| 6                                                                                                                                                | -4.297512000 | 0.243353000  | -0.441731000 | 6                                                                                                                                                 | 4.284012000  | -0.517043000 | -0.154199000 |
| 6                                                                                                                                                | -3.041778000 | -1.524760000 | 1.569038000  | 6                                                                                                                                                 | 3.174882000  | 2.326611000  | 0.218173000  |
| 1                                                                                                                                                | -0.563458000 | -1.388804000 | -1.278947000 | 1                                                                                                                                                 | 0.687238000  | 1.482517000  | -0.721938000 |
| 1                                                                                                                                                | 1.830530000  | -1.751515000 | -1.202179000 | 1                                                                                                                                                 | -1.676591000 | 1.978542000  | -0.620630000 |
| 1                                                                                                                                                | 2.297963000  | 1.956744000  | 0.941618000  | 1                                                                                                                                                 | -2.448817000 | -2.069786000 | 0.633677000  |
| 1                                                                                                                                                | -0.112479000 | 2.315787000  | 0.781479000  | 1                                                                                                                                                 | -0.058983000 | -2.544054000 | 0.460529000  |
| 1                                                                                                                                                | -4.634115000 | 0.669964000  | 0.507470000  | 1                                                                                                                                                 | 4.549632000  | -1.071688000 | 0.752562000  |
| 1                                                                                                                                                | -4.415896000 | 1.001551000  | -1.211175000 | 1                                                                                                                                                 | 4.385601000  | -1.186448000 | -1.003553000 |
| 1                                                                                                                                                | -4.905854000 | -0.627579000 | -0.688369000 | 1                                                                                                                                                 | 4.959396000  | 0.327551000  | -0.276329000 |
| 1                                                                                                                                                | -4.118938000 | -1.381147000 | 1.709131000  | 1                                                                                                                                                 | 2.639354000  | 2.556497000  | -0.703492000 |
| 1                                                                                                                                                | -2.767024000 | -2.513783000 | 1.935176000  | 1                                                                                                                                                 | 2.966614000  | 3.112201000  | 0.944814000  |
| 1                                                                                                                                                | -2.505770000 | -0.779745000 | 2.158830000  | 1                                                                                                                                                 | 4.248822000  | 2.330454000  | 0.000369000  |
| 1                                                                                                                                                | -3.029081000 | -2.136399000 | -0.391160000 | 1                                                                                                                                                 | 3.083819000  | 0.883271000  | 1.668491000  |
| 7                                                                                                                                                | 3.645829000  | -0.125462000 | -0.084908000 | 7                                                                                                                                                 | -3.617764000 | 0.302739000  | 0.171765000  |
| 6                                                                                                                                                | 4.173151000  | -1.426810000 | -0.440343000 | 6                                                                                                                                                 | -4.110638000 | 1.537816000  | -0.402994000 |
| 1                                                                                                                                                | 3.957773000  | -1.661419000 | -1.484601000 | 1                                                                                                                                                 | -3.915774000 | 1.605944000  | -1.480951000 |
| 1                                                                                                                                                | 5.254069000  | -1.415447000 | -0.322590000 | 1                                                                                                                                                 | -5.183897000 | 1.600820000  | -0.239440000 |
| 1                                                                                                                                                | 3.761134000  | -2.229035000 | 0.184963000  | 1                                                                                                                                                 | -3.652047000 | 2.400116000  | 0.083946000  |
| 6                                                                                                                                                | 4.446620000  | 0.721934000  | 0.774922000  | 6                                                                                                                                                 | -4.555552000 | -0.792763000 | 0.314356000  |
| 1                                                                                                                                                | 5.486848000  | 0.412321000  | 0.708261000  | 1                                                                                                                                                 | -4.513173000 | -1.493379000 | -0.529323000 |
| 1                                                                                                                                                | 4.390649000  | 1.763616000  | 0.453374000  | 1                                                                                                                                                 | -4.360999000 | -1.349097000 | 1.232713000  |
| 1                                                                                                                                                | 4.131737000  | 0.668316000  | 1.824742000  | 1                                                                                                                                                 | -5.563114000 | -0.389226000 | 0.382094000  |

|                                                                                                                                                  |              |              |              |                                                                                                                                                   |              |              |              |
|--------------------------------------------------------------------------------------------------------------------------------------------------|--------------|--------------|--------------|---------------------------------------------------------------------------------------------------------------------------------------------------|--------------|--------------|--------------|
| 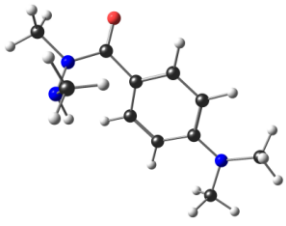 <p style="text-align: center;"><b>7</b><br/><b>E-sc-bH</b></p> |              |              |              |  <p style="text-align: center;"><b>7</b><br/><b>E-sc-fH</b></p> |              |              |              |
| 8                                                                                                                                                | -2.477199000 | 1.875415000  | -0.584526000 | 8                                                                                                                                                 | 2.270740000  | -2.076562000 | -0.627306000 |
| 7                                                                                                                                                | -2.905342000 | -0.339819000 | -0.346866000 | 7                                                                                                                                                 | 2.935339000  | 0.006117000  | -0.064781000 |
| 7                                                                                                                                                | -2.617214000 | -1.459693000 | 0.466350000  | 7                                                                                                                                                 | 2.727488000  | 1.034768000  | 0.893454000  |
| 6                                                                                                                                                | 0.017998000  | -0.612363000 | -0.929071000 | 6                                                                                                                                                 | 0.012431000  | 0.674556000  | -0.557682000 |
| 6                                                                                                                                                | 1.386101000  | -0.805008000 | -0.861090000 | 6                                                                                                                                                 | -1.340479000 | 0.948586000  | -0.470455000 |
| 6                                                                                                                                                | 2.205907000  | 0.098670000  | -0.159214000 | 6                                                                                                                                                 | -2.236824000 | -0.004427000 | 0.048579000  |
| 6                                                                                                                                                | 1.582538000  | 1.200915000  | 0.457022000  | 6                                                                                                                                                 | -1.708783000 | -1.252465000 | 0.430494000  |
| 6                                                                                                                                                | 0.216673000  | 1.384934000  | 0.363427000  | 6                                                                                                                                                 | -0.357706000 | -1.514355000 | 0.318410000  |
| 6                                                                                                                                                | -0.591611000 | 0.473886000  | -0.308572000 | 6                                                                                                                                                 | 0.531019000  | -0.552495000 | -0.155487000 |
| 6                                                                                                                                                | -2.054905000 | 0.749586000  | -0.405543000 | 6                                                                                                                                                 | 1.965102000  | -0.943412000 | -0.302211000 |
| 6                                                                                                                                                | -4.328491000 | -0.082458000 | -0.487118000 | 6                                                                                                                                                 | 4.310649000  | -0.468782000 | -0.076767000 |
| 6                                                                                                                                                | -2.433307000 | -1.110033000 | 1.872501000  | 6                                                                                                                                                 | 2.921163000  | 2.362515000  | 0.325301000  |
| 1                                                                                                                                                | -0.580442000 | -1.303985000 | -1.513274000 | 1                                                                                                                                                 | 0.669690000  | 1.420279000  | -0.986448000 |
| 1                                                                                                                                                | 1.817591000  | -1.654886000 | -1.368972000 | 1                                                                                                                                                 | -1.698915000 | 1.904302000  | -0.823208000 |
| 1                                                                                                                                                | 2.167693000  | 1.924910000  | 1.004383000  | 1                                                                                                                                                 | -2.357919000 | -2.028522000 | 0.807655000  |
| 1                                                                                                                                                | -0.246206000 | 2.252249000  | 0.819020000  | 1                                                                                                                                                 | 0.031305000  | -2.487844000 | 0.590546000  |
| 1                                                                                                                                                | -4.762045000 | 0.322980000  | 0.432771000  | 1                                                                                                                                                 | 4.517915000  | -1.090594000 | 0.797941000  |
| 1                                                                                                                                                | -4.478813000 | 0.645458000  | -1.279931000 | 1                                                                                                                                                 | 4.475656000  | -1.053437000 | -0.977136000 |
| 1                                                                                                                                                | -4.814333000 | -1.023387000 | -0.734034000 | 1                                                                                                                                                 | 4.972579000  | 0.395114000  | -0.071367000 |
| 1                                                                                                                                                | -3.360541000 | -0.681144000 | 2.253713000  | 1                                                                                                                                                 | 2.321585000  | 2.559175000  | -0.569548000 |
| 1                                                                                                                                                | -2.231346000 | -2.026814000 | 2.426730000  | 1                                                                                                                                                 | 2.676032000  | 3.095617000  | 1.093973000  |
| 1                                                                                                                                                | -1.615617000 | -0.400215000 | 2.042674000  | 1                                                                                                                                                 | 3.972335000  | 2.491779000  | 0.064815000  |
| 1                                                                                                                                                | -1.795501000 | -1.924276000 | 0.105248000  | 1                                                                                                                                                 | 1.789767000  | 0.935005000  | 1.264656000  |
| 7                                                                                                                                                | 3.571053000  | -0.078487000 | -0.093788000 | 7                                                                                                                                                 | -3.582111000 | 0.272760000  | 0.177514000  |
| 6                                                                                                                                                | 4.133126000  | -1.342268000 | -0.523958000 | 6                                                                                                                                                 | -4.113591000 | 1.454598000  | -0.470878000 |
| 1                                                                                                                                                | 3.955421000  | -1.504985000 | -1.588928000 | 1                                                                                                                                                 | -3.952446000 | 1.444886000  | -1.556304000 |
| 1                                                                                                                                                | 5.209034000  | -1.323310000 | -0.369368000 | 1                                                                                                                                                 | -5.182236000 | 1.512854000  | -0.279164000 |
| 1                                                                                                                                                | 3.715282000  | -2.192973000 | 0.028962000  | 1                                                                                                                                                 | -3.656373000 | 2.357620000  | -0.062725000 |
| 6                                                                                                                                                | 4.338903000  | 0.738250000  | 0.824118000  | 6                                                                                                                                                 | -4.495164000 | -0.823726000 | 0.435151000  |
| 1                                                                                                                                                | 5.383703000  | 0.442091000  | 0.772699000  | 1                                                                                                                                                 | -4.445737000 | -1.598219000 | -0.340330000 |
| 1                                                                                                                                                | 4.280293000  | 1.793096000  | 0.548614000  | 1                                                                                                                                                 | -4.280839000 | -1.288290000 | 1.399219000  |
| 1                                                                                                                                                | 3.996336000  | 0.633192000  | 1.861020000  | 1                                                                                                                                                 | -5.510239000 | -0.436306000 | 0.475834000  |

|                                                                                                                                                    |              |              |              |                                                                                                                                                     |              |              |              |
|----------------------------------------------------------------------------------------------------------------------------------------------------|--------------|--------------|--------------|-----------------------------------------------------------------------------------------------------------------------------------------------------|--------------|--------------|--------------|
| 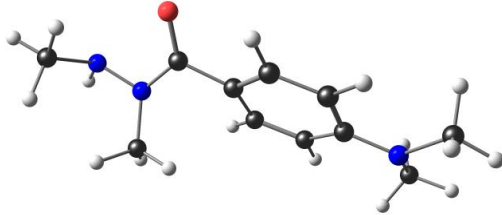 <p style="text-align: center;"><b>7</b><br/><b>Z-ac-bH</b></p> |              |              |              |  <p style="text-align: center;"><b>7</b><br/><b>Z-ac-fH</b></p> |              |              |              |
| 8                                                                                                                                                  | -2.287084000 | 1.570769000  | -0.794878000 | 8                                                                                                                                                   | -2.176469000 | 1.944479000  | -0.530438000 |
| 7                                                                                                                                                  | -2.717638000 | -0.546527000 | -0.099366000 | 7                                                                                                                                                   | -2.730269000 | -0.177548000 | 0.109849000  |
| 7                                                                                                                                                  | -4.058571000 | -0.357956000 | -0.480073000 | 7                                                                                                                                                   | -4.056703000 | 0.136933000  | -0.234396000 |
| 6                                                                                                                                                  | 0.219073000  | -0.931241000 | -0.462317000 | 6                                                                                                                                                   | 0.107854000  | -0.797320000 | -0.306907000 |
| 6                                                                                                                                                  | 1.590677000  | -1.071301000 | -0.354280000 | 6                                                                                                                                                   | 1.462400000  | -1.071037000 | -0.269277000 |
| 6                                                                                                                                                  | 2.393737000  | 0.005475000  | 0.065558000  | 6                                                                                                                                                   | 2.393704000  | -0.058361000 | 0.029829000  |

|   |              |              |              |   |              |              |              |
|---|--------------|--------------|--------------|---|--------------|--------------|--------------|
| 6 | 1.753737000  | 1.233423000  | 0.320499000  | 6 | 1.897021000  | 1.242835000  | 0.239477000  |
| 6 | 0.384659000  | 1.358583000  | 0.188245000  | 6 | 0.541386000  | 1.499695000  | 0.181612000  |
| 6 | -0.409985000 | 0.277235000  | -0.179831000 | 6 | -0.377714000 | 0.485366000  | -0.069685000 |
| 6 | -1.872447000 | 0.508981000  | -0.377645000 | 6 | -1.821563000 | 0.843825000  | -0.176209000 |
| 6 | -2.475259000 | -1.544611000 | 0.932115000  | 6 | -2.564092000 | -0.979416000 | 1.320961000  |
| 6 | -4.839260000 | 0.402337000  | 0.490815000  | 6 | -4.858298000 | -1.049942000 | -0.470983000 |
| 1 | -0.368922000 | -1.777171000 | -0.800485000 | 1 | -0.585575000 | -1.594241000 | -0.550364000 |
| 1 | 2.036158000  | -2.021440000 | -0.608608000 | 1 | 1.794822000  | -2.075896000 | -0.483368000 |
| 1 | 2.327726000  | 2.100504000  | 0.612318000  | 1 | 2.573431000  | 2.060822000  | 0.438343000  |
| 1 | -0.092632000 | 2.316081000  | 0.357958000  | 1 | 0.170508000  | 2.507790000  | 0.321360000  |
| 1 | -2.556727000 | -2.552909000 | 0.515821000  | 1 | -2.822946000 | -2.022676000 | 1.133916000  |
| 1 | -1.485654000 | -1.422287000 | 1.362146000  | 1 | -1.535460000 | -0.934264000 | 1.665933000  |
| 1 | -3.211531000 | -1.437470000 | 1.732397000  | 1 | -3.215749000 | -0.593185000 | 2.113610000  |
| 1 | -4.459662000 | 1.422569000  | 0.501117000  | 1 | -4.984438000 | -1.703279000 | 0.401678000  |
| 1 | -5.874094000 | 0.419789000  | 0.149373000  | 1 | -5.844107000 | -0.726253000 | -0.803873000 |
| 1 | -4.813614000 | -0.006028000 | 1.508641000  | 1 | -4.395945000 | -1.624482000 | -1.274265000 |
| 1 | -4.454563000 | -1.276659000 | -0.641114000 | 1 | -4.467368000 | 0.728571000  | 0.485742000  |
| 7 | 3.757614000  | -0.138065000 | 0.223592000  | 7 | 3.742576000  | -0.332149000 | 0.117873000  |
| 6 | 4.568810000  | 1.052531000  | 0.380215000  | 6 | 4.229262000  | -1.606822000 | -0.369448000 |
| 1 | 4.471273000  | 1.740857000  | -0.468742000 | 1 | 3.999136000  | -1.764474000 | -1.430644000 |
| 1 | 4.296589000  | 1.589297000  | 1.290572000  | 1 | 5.308023000  | -1.647023000 | -0.239179000 |
| 1 | 5.612039000  | 0.759534000  | 0.471205000  | 1 | 3.796786000  | -2.430438000 | 0.201714000  |
| 6 | 4.397932000  | -1.324474000 | -0.306873000 | 6 | 4.677972000  | 0.773040000  | 0.175309000  |
| 1 | 4.012896000  | -2.221651000 | 0.181041000  | 1 | 5.688003000  | 0.377346000  | 0.250504000  |
| 1 | 4.252766000  | -1.430982000 | -1.389536000 | 1 | 4.619106000  | 1.419174000  | -0.709559000 |
| 1 | 5.464751000  | -1.271970000 | -0.103159000 | 1 | 4.496696000  | 1.384844000  | 1.060591000  |

|                                                                                     |              |              |              |                                                                                      |              |              |              |
|-------------------------------------------------------------------------------------|--------------|--------------|--------------|--------------------------------------------------------------------------------------|--------------|--------------|--------------|
| 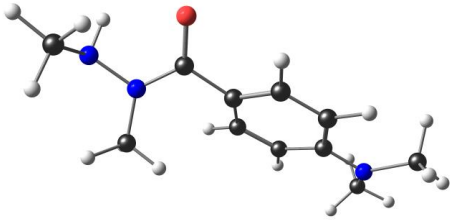 |              |              |              |  |              |              |              |
| <b>7</b>                                                                            |              |              |              | <b>7</b>                                                                             |              |              |              |
| <b>Z-sc-bH</b>                                                                      |              |              |              | <b>Z-sc-fH</b>                                                                       |              |              |              |
| 8                                                                                   | 2.297935000  | -1.501381000 | -0.879019000 | 8                                                                                    | -2.308398000 | 1.711568000  | -0.436054000 |
| 7                                                                                   | 2.742415000  | 0.533891000  | -0.029897000 | 7                                                                                    | -2.759528000 | -0.346597000 | 0.372241000  |
| 7                                                                                   | 4.102603000  | 0.379588000  | -0.367724000 | 7                                                                                    | -4.135865000 | -0.075045000 | 0.212915000  |
| 6                                                                                   | -0.229861000 | 0.949881000  | -0.463961000 | 6                                                                                    | 0.122346000  | -0.878106000 | -0.272947000 |
| 6                                                                                   | -1.603229000 | 1.071133000  | -0.352025000 | 6                                                                                    | 1.491459000  | -1.071452000 | -0.294378000 |
| 6                                                                                   | -2.390574000 | -0.015132000 | 0.071498000  | 6                                                                                    | 2.372466000  | -0.020362000 | 0.022604000  |
| 6                                                                                   | -1.733645000 | -1.235206000 | 0.320901000  | 6                                                                                    | 1.808755000  | 1.237952000  | 0.309920000  |
| 6                                                                                   | -0.363661000 | -1.342744000 | 0.183746000  | 6                                                                                    | 0.439566000  | 1.416995000  | 0.304786000  |
| 6                                                                                   | 0.416449000  | -0.249253000 | -0.181548000 | 6                                                                                    | -0.427369000 | 0.361092000  | 0.040182000  |
| 6                                                                                   | 1.880012000  | -0.466877000 | -0.377901000 | 6                                                                                    | -1.889078000 | 0.644489000  | -0.016991000 |
| 6                                                                                   | 2.472940000  | 1.704673000  | 0.778327000  | 6                                                                                    | -2.492773000 | -1.342582000 | 1.397943000  |
| 6                                                                                   | 4.792883000  | -0.469504000 | 0.609465000  | 6                                                                                    | -4.556812000 | -0.371967000 | -1.157221000 |
| 1                                                                                   | 0.341011000  | 1.805170000  | -0.806318000 | 1                                                                                    | -0.528705000 | -1.704866000 | -0.533978000 |
| 1                                                                                   | -2.061391000 | 2.015377000  | -0.605612000 | 1                                                                                    | 1.873484000  | -2.043315000 | -0.569118000 |
| 1                                                                                   | -2.295445000 | -2.110483000 | 0.611915000  | 1                                                                                    | 2.442070000  | 2.084908000  | 0.528649000  |
| 1                                                                                   | 0.124185000  | -2.295751000 | 0.348100000  | 1                                                                                    | 0.018097000  | 2.396104000  | 0.497477000  |
| 1                                                                                   | 2.481264000  | 2.613911000  | 0.172574000  | 1                                                                                    | -2.783972000 | -2.334185000 | 1.046210000  |
| 1                                                                                   | 1.514780000  | 1.602877000  | 1.279277000  | 1                                                                                    | -1.438224000 | -1.348183000 | 1.656577000  |
| 1                                                                                   | 3.252873000  | 1.793555000  | 1.536219000  | 1                                                                                    | -3.080448000 | -1.104173000 | 2.286005000  |
| 1                                                                                   | 4.309002000  | -1.441084000 | 0.734802000  | 1                                                                                    | -4.464784000 | -1.444274000 | -1.330799000 |
| 1                                                                                   | 5.816989000  | -0.612199000 | 0.264745000  | 1                                                                                    | -5.607283000 | -0.097009000 | -1.255074000 |
| 1                                                                                   | 4.831520000  | 0.048246000  | 1.568876000  | 1                                                                                    | -3.970257000 | 0.170511000  | -1.904764000 |
| 1                                                                                   | 4.104775000  | -0.104906000 | -1.261121000 | 1                                                                                    | -4.241725000 | 0.926662000  | 0.362697000  |
| 7                                                                                   | -3.755063000 | 0.110753000  | 0.237143000  | 7                                                                                    | 3.737066000  | -0.215704000 | 0.050898000  |
| 6                                                                                   | -4.551157000 | -1.090478000 | 0.390297000  | 6                                                                                    | 4.278524000  | -1.443081000 | -0.495807000 |



|   |              |              |              |   |             |              |              |
|---|--------------|--------------|--------------|---|-------------|--------------|--------------|
| 1 | -4.447758000 | -1.772920000 | -0.462687000 | 1 | 4.024340000 | -1.578090000 | -1.554718000 |
| 1 | -4.269766000 | -1.628817000 | 1.296986000  | 1 | 5.361395000 | -1.426219000 | -0.398829000 |
| 1 | -5.597626000 | -0.810862000 | 0.485798000  | 1 | 3.911117000 | -2.308714000 | 0.058729000  |
| 6 | -4.412110000 | 1.294613000  | -0.278081000 | 6 | 4.606508000 | 0.941909000  | 0.115764000  |
| 1 | -4.031355000 | 2.191487000  | 0.213796000  | 1 | 5.641277000 | 0.608119000  | 0.107608000  |
| 1 | -4.278101000 | 1.411441000  | -1.361139000 | 1 | 4.452720000 | 1.627514000  | -0.726701000 |
| 1 | -5.476417000 | 1.229739000  | -0.065020000 | 1 | 4.444815000 | 1.494748000  | 1.042956000  |

|                                                                                                                                                  |              |              |              |                                                                                                                                                   |              |              |              |
|--------------------------------------------------------------------------------------------------------------------------------------------------|--------------|--------------|--------------|---------------------------------------------------------------------------------------------------------------------------------------------------|--------------|--------------|--------------|
| 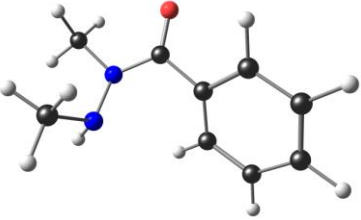 <p style="text-align: center;"><b>9</b><br/><b>E-ac-bH</b></p> |              |              |              |  <p style="text-align: center;"><b>9</b><br/><b>E-ac-fH</b></p> |              |              |              |
| 8                                                                                                                                                | -0.904406000 | -2.091994000 | 0.141726000  | 8                                                                                                                                                 | 0.731062000  | -2.188073000 | -0.419259000 |
| 7                                                                                                                                                | -1.749565000 | -0.027480000 | 0.432083000  | 7                                                                                                                                                 | 1.750722000  | -0.207617000 | -0.070611000 |
| 7                                                                                                                                                | -1.607914000 | 1.309923000  | 0.034060000  | 7                                                                                                                                                 | 1.665458000  | 0.953623000  | 0.713581000  |
| 6                                                                                                                                                | 1.144758000  | 0.722887000  | 0.896711000  | 6                                                                                                                                                 | -1.002751000 | 0.928291000  | -0.524584000 |
| 6                                                                                                                                                | 2.473207000  | 1.113074000  | 0.823466000  | 6                                                                                                                                                 | -2.299962000 | 1.415973000  | -0.479004000 |
| 6                                                                                                                                                | 3.349084000  | 0.454126000  | -0.030854000 | 6                                                                                                                                                 | -3.324709000 | 0.627074000  | 0.029735000  |
| 6                                                                                                                                                | 2.898793000  | -0.613620000 | -0.795495000 | 6                                                                                                                                                 | -3.052594000 | -0.659947000 | 0.473311000  |
| 6                                                                                                                                                | 1.575805000  | -1.021474000 | -0.703426000 | 6                                                                                                                                                 | -1.759130000 | -1.156906000 | 0.405029000  |
| 6                                                                                                                                                | 0.689309000  | -0.344850000 | 0.128199000  | 6                                                                                                                                                 | -0.726135000 | -0.360494000 | -0.078962000 |
| 6                                                                                                                                                | -0.702118000 | -0.895540000 | 0.221719000  | 6                                                                                                                                                 | 0.624430000  | -1.000277000 | -0.188299000 |
| 6                                                                                                                                                | -3.085821000 | -0.606816000 | 0.469218000  | 6                                                                                                                                                 | 3.034625000  | -0.892003000 | -0.120514000 |
| 6                                                                                                                                                | -2.123447000 | 1.569126000  | -1.307012000 | 6                                                                                                                                                 | 2.347099000  | 2.095204000  | 0.121453000  |
| 1                                                                                                                                                | 0.462556000  | 1.239791000  | 1.556879000  | 1                                                                                                                                                 | -0.207989000 | 1.544865000  | -0.920684000 |
| 1                                                                                                                                                | 2.826145000  | 1.935121000  | 1.433478000  | 1                                                                                                                                                 | -2.512416000 | 2.414594000  | -0.839568000 |
| 1                                                                                                                                                | 4.383485000  | 0.768936000  | -0.093706000 | 1                                                                                                                                                 | -4.335257000 | 1.014049000  | 0.073445000  |
| 1                                                                                                                                                | 3.580217000  | -1.136405000 | -1.454751000 | 1                                                                                                                                                 | -3.849454000 | -1.281281000 | 0.861993000  |
| 1                                                                                                                                                | 1.214466000  | -1.874224000 | -1.264403000 | 1                                                                                                                                                 | -1.532468000 | -2.169365000 | 0.714481000  |
| 1                                                                                                                                                | -3.418281000 | -0.944371000 | -0.516214000 | 1                                                                                                                                                 | 3.235062000  | -1.424088000 | 0.815718000  |
| 1                                                                                                                                                | -3.078319000 | -1.466073000 | 1.134582000  | 1                                                                                                                                                 | 3.023441000  | -1.616335000 | -0.929955000 |
| 1                                                                                                                                                | -3.775112000 | 0.147225000  | 0.850061000  | 1                                                                                                                                                 | 3.819764000  | -0.160011000 | -0.299315000 |
| 1                                                                                                                                                | -3.184585000 | 1.326799000  | -1.432116000 | 1                                                                                                                                                 | 1.865424000  | 2.344145000  | -0.824350000 |
| 1                                                                                                                                                | -1.974014000 | 2.625746000  | -1.527538000 | 1                                                                                                                                                 | 2.235143000  | 2.940948000  | 0.799802000  |
| 1                                                                                                                                                | -1.539814000 | 0.984629000  | -2.019564000 | 1                                                                                                                                                 | 3.414963000  | 1.938906000  | -0.066739000 |
| 1                                                                                                                                                | -2.076567000 | 1.890191000  | 0.721321000  | 1                                                                                                                                                 | 2.036802000  | 0.754623000  | 1.639459000  |

|                                                                                                                                                    |              |              |              |                                                                                                                                                     |              |              |              |
|----------------------------------------------------------------------------------------------------------------------------------------------------|--------------|--------------|--------------|-----------------------------------------------------------------------------------------------------------------------------------------------------|--------------|--------------|--------------|
| 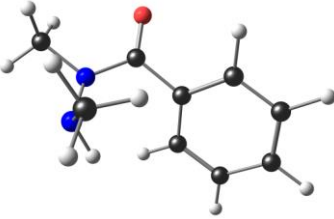 <p style="text-align: center;"><b>9</b><br/><b>E-sc-bH</b></p> |              |              |              |  <p style="text-align: center;"><b>9</b><br/><b>E-sc-fH</b></p> |              |              |              |
| 8                                                                                                                                                  | -1.096831000 | -2.055354000 | 0.042779000  | 8                                                                                                                                                   | 0.940299000  | -2.126171000 | -0.617909000 |
| 7                                                                                                                                                  | -1.799471000 | 0.067716000  | 0.417506000  | 7                                                                                                                                                   | 1.793174000  | -0.114180000 | -0.032346000 |
| 7                                                                                                                                                  | -1.656591000 | 1.415695000  | 0.027330000  | 7                                                                                                                                                   | 1.648563000  | 0.964459000  | 0.875371000  |
| 6                                                                                                                                                  | 1.106817000  | 0.451991000  | 1.102666000  | 6                                                                                                                                                   | -1.062866000 | 0.695362000  | -0.858549000 |
| 6                                                                                                                                                  | 2.446789000  | 0.813487000  | 1.073399000  | 6                                                                                                                                                   | -2.377562000 | 1.128157000  | -0.752860000 |
| 6                                                                                                                                                  | 3.273808000  | 0.330210000  | 0.067737000  | 6                                                                                                                                                   | -3.268844000 | 0.450431000  | 0.068763000  |
| 6                                                                                                                                                  | 2.765692000  | -0.533797000 | -0.894780000 | 6                                                                                                                                                   | -2.849950000 | -0.675040000 | 0.767412000  |

|   |              |              |              |   |              |              |              |
|---|--------------|--------------|--------------|---|--------------|--------------|--------------|
| 6 | 1.431221000  | -0.909963000 | -0.855292000 | 6 | -1.541312000 | -1.120294000 | 0.648125000  |
| 6 | 0.592696000  | -0.401921000 | 0.131108000  | 6 | -0.638487000 | -0.425014000 | -0.150555000 |
| 6 | -0.830910000 | -0.876895000 | 0.167415000  | 6 | 0.753783000  | -0.970687000 | -0.289569000 |
| 6 | -3.180125000 | -0.378894000 | 0.498843000  | 6 | 3.134673000  | -0.675806000 | -0.041804000 |
| 6 | -1.483978000 | 1.578632000  | -1.413823000 | 6 | 1.809262000  | 2.263102000  | 0.232212000  |
| 1 | 0.465110000  | 0.804141000  | 1.903426000  | 1 | -0.371812000 | 1.205014000  | -1.518102000 |
| 1 | 2.846556000  | 1.466680000  | 1.838743000  | 1 | -2.707510000 | 1.990434000  | -1.318725000 |
| 1 | 4.317521000  | 0.617675000  | 0.041162000  | 1 | -3.546567000 | -1.212839000 | 1.398033000  |
| 1 | 3.413703000  | -0.921981000 | -1.670351000 | 1 | -1.209344000 | -2.013489000 | 1.163221000  |
| 1 | 1.025331000  | -1.606275000 | -1.579119000 | 1 | 3.321931000  | -1.254223000 | 0.866232000  |
| 1 | -3.619068000 | -0.522083000 | -0.493360000 | 1 | 3.239043000  | -1.323219000 | -0.907695000 |
| 1 | -3.212669000 | -1.328926000 | 1.025478000  | 1 | 3.850095000  | 0.142434000  | -0.100868000 |
| 1 | -3.742896000 | 0.378456000  | 1.039016000  | 1 | 1.082297000  | 2.458166000  | -0.561127000 |
| 1 | -2.368548000 | 1.190659000  | -1.919628000 | 1 | 1.716756000  | 3.030804000  | 1.000407000  |
| 1 | -1.410977000 | 2.644774000  | -1.628549000 | 1 | 2.812367000  | 2.327102000  | -0.190088000 |
| 1 | -0.596062000 | 1.071924000  | -1.808545000 | 1 | 0.738510000  | 0.893479000  | 1.316553000  |
| 1 | -0.882964000 | 1.826820000  | 0.532000000  | 1 | -4.292497000 | 0.792487000  | 0.155200000  |

|                                                                                                                                                  |              |              |              |                                                                                                                                                   |              |              |              |
|--------------------------------------------------------------------------------------------------------------------------------------------------|--------------|--------------|--------------|---------------------------------------------------------------------------------------------------------------------------------------------------|--------------|--------------|--------------|
| 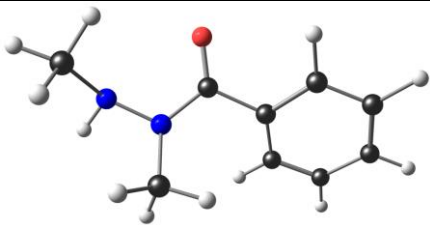 <p style="text-align: center;"><b>9</b><br/><b>Z-ac-bH</b></p> |              |              |              |  <p style="text-align: center;"><b>9</b><br/><b>Z-ac-fH</b></p> |              |              |              |
| 8                                                                                                                                                | 1.003514000  | -1.619191000 | -0.729096000 | 8                                                                                                                                                 | -0.757649000 | 1.972411000  | -0.425460000 |
| 7                                                                                                                                                | 1.544738000  | 0.507136000  | -0.146348000 | 7                                                                                                                                                 | -1.571371000 | -0.082166000 | 0.149426000  |
| 7                                                                                                                                                | 2.871948000  | 0.238150000  | -0.525487000 | 7                                                                                                                                                 | -2.863020000 | 0.403468000  | -0.104358000 |
| 6                                                                                                                                                | -1.382474000 | 0.976789000  | -0.556732000 | 6                                                                                                                                                 | 1.159822000  | -1.013264000 | -0.487990000 |
| 6                                                                                                                                                | -2.749102000 | 1.172773000  | -0.416007000 | 6                                                                                                                                                 | 2.480346000  | -1.439619000 | -0.501388000 |
| 6                                                                                                                                                | -3.537473000 | 0.181700000  | 0.154578000  | 6                                                                                                                                                 | 3.491728000  | -0.580015000 | -0.091276000 |
| 6                                                                                                                                                | -2.960751000 | -1.013972000 | 0.565265000  | 6                                                                                                                                                 | 3.183061000  | 0.712095000  | 0.315743000  |
| 6                                                                                                                                                | -1.598280000 | -1.217944000 | 0.406059000  | 6                                                                                                                                                 | 1.865271000  | 1.144279000  | 0.312447000  |
| 6                                                                                                                                                | -0.800942000 | -0.216449000 | -0.138054000 | 6                                                                                                                                                 | 0.847282000  | 0.278407000  | -0.073427000 |
| 6                                                                                                                                                | 0.654091000  | -0.520509000 | -0.355125000 | 6                                                                                                                                                 | -0.552711000 | 0.821772000  | -0.120260000 |
| 6                                                                                                                                                | 1.348981000  | 1.591809000  | 0.804862000  | 6                                                                                                                                                 | -1.452866000 | -1.068179000 | 1.220030000  |
| 6                                                                                                                                                | 3.629686000  | -0.484349000 | 0.491434000  | 6                                                                                                                                                 | -3.776722000 | -0.647615000 | -0.517896000 |
| 1                                                                                                                                                | -0.766562000 | 1.744473000  | -1.010965000 | 1                                                                                                                                                 | 0.368388000  | -1.677153000 | -0.815947000 |
| 1                                                                                                                                                | -3.199481000 | 2.096395000  | -0.757352000 | 1                                                                                                                                                 | 2.721245000  | -2.440731000 | -0.836057000 |
| 1                                                                                                                                                | -4.602885000 | 0.337714000  | 0.270031000  | 1                                                                                                                                                 | 4.521451000  | -0.915413000 | -0.096341000 |
| 1                                                                                                                                                | -3.576226000 | -1.791463000 | 0.999938000  | 1                                                                                                                                                 | 3.971767000  | 1.385465000  | 0.626756000  |
| 1                                                                                                                                                | -1.134919000 | -2.155449000 | 0.687334000  | 1                                                                                                                                                 | 1.605360000  | 2.156682000  | 0.595392000  |
| 1                                                                                                                                                | 1.478007000  | 2.559633000  | 0.312472000  | 1                                                                                                                                                 | -1.802413000 | -2.047873000 | 0.890611000  |
| 1                                                                                                                                                | 0.354630000  | 1.550540000  | 1.239265000  | 1                                                                                                                                                 | -0.419967000 | -1.159061000 | 1.542081000  |
| 1                                                                                                                                                | 2.079096000  | 1.510475000  | 1.613659000  | 1                                                                                                                                                 | -2.056834000 | -0.750788000 | 2.077194000  |
| 1                                                                                                                                                | 3.196289000  | -1.478328000 | 0.589930000  | 1                                                                                                                                                 | -3.945934000 | -1.431903000 | 0.230738000  |
| 1                                                                                                                                                | 4.654380000  | -0.587511000 | 0.135505000  | 1                                                                                                                                                 | -4.734341000 | -0.183126000 | -0.751423000 |
| 1                                                                                                                                                | 3.646924000  | 0.005107000  | 1.472908000  | 1                                                                                                                                                 | -3.387754000 | -1.107210000 | -1.426786000 |
| 1                                                                                                                                                | 3.303413000  | 1.125840000  | -0.754782000 | 1                                                                                                                                                 | -3.210309000 | 0.895553000  | 0.716087000  |

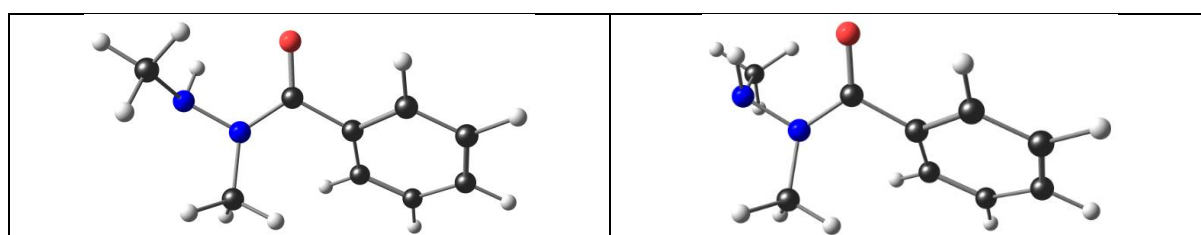

| <b>9</b><br><b>Z-sc-bH</b> |              |              |              | <b>9</b><br><b>Z-sc-fH</b> |              |              |              |
|----------------------------|--------------|--------------|--------------|----------------------------|--------------|--------------|--------------|
| 8                          | 1.034896000  | -1.534372000 | -0.851338000 | 8                          | -1.010092000 | -1.767513000 | 0.239040000  |
| 7                          | 1.560548000  | 0.509470000  | -0.067877000 | 7                          | -1.583202000 | 0.324997000  | -0.377108000 |
| 7                          | 2.911461000  | 0.303774000  | -0.414156000 | 7                          | -2.942147000 | -0.052003000 | -0.331068000 |
| 6                          | -1.407638000 | 0.967402000  | -0.559905000 | 6                          | 1.202725000  | 0.961417000  | 0.565937000  |
| 6                          | -2.776714000 | 1.129558000  | -0.399850000 | 6                          | 2.557515000  | 1.241662000  | 0.673037000  |
| 6                          | -3.531268000 | 0.124208000  | 0.190311000  | 6                          | 3.494487000  | 0.325466000  | 0.212426000  |
| 6                          | -2.918622000 | -1.053892000 | 0.599604000  | 6                          | 3.076215000  | -0.880464000 | -0.336775000 |
| 6                          | -1.554205000 | -1.225465000 | 0.420703000  | 6                          | 1.723033000  | -1.170086000 | -0.425606000 |
| 6                          | -0.790327000 | -0.207057000 | -0.140292000 | 6                          | 0.781752000  | -0.242052000 | 0.007644000  |
| 6                          | 0.667833000  | -0.474219000 | -0.368929000 | 6                          | -0.664039000 | -0.633364000 | -0.045354000 |
| 6                          | 1.325783000  | 1.731243000  | 0.674397000  | 6                          | -1.337220000 | 1.497284000  | -1.200984000 |
| 6                          | 3.586964000  | -0.527735000 | 0.588401000  | 6                          | -3.452834000 | 0.054945000  | 1.037447000  |
| 1                          | -0.821652000 | 1.748986000  | -1.029295000 | 1                          | 0.469242000  | 1.670110000  | 0.933210000  |
| 1                          | -3.254716000 | 2.039548000  | -0.740019000 | 1                          | 2.882741000  | 2.172874000  | 1.119527000  |
| 1                          | -4.598124000 | 0.255128000  | 0.322110000  | 1                          | 4.551492000  | 0.547539000  | 0.290014000  |
| 1                          | -3.507102000 | -1.843721000 | 1.049168000  | 1                          | 3.806068000  | -1.599136000 | -0.687726000 |
| 1                          | -1.066088000 | -2.150592000 | 0.700951000  | 1                          | 1.376850000  | -2.118031000 | -0.818296000 |
| 1                          | 1.369294000  | 2.603256000  | 0.018237000  | 1                          | -1.712326000 | 2.394522000  | -0.704648000 |
| 1                          | 0.361269000  | 1.690082000  | 1.171743000  | 1                          | -0.274422000 | 1.611647000  | -1.392023000 |
| 1                          | 2.103327000  | 1.834335000  | 1.432697000  | 1                          | -1.863996000 | 1.379320000  | -2.148705000 |
| 1                          | 3.084009000  | -1.485016000 | 0.745635000  | 1                          | -3.446396000 | 1.103523000  | 1.335811000  |
| 1                          | 4.606977000  | -0.702130000 | 0.246699000  | 1                          | -4.484637000 | -0.296345000 | 1.041171000  |
| 1                          | 3.637221000  | 0.019698000  | 1.530438000  | 1                          | -2.867733000 | -0.532422000 | -1.751223000 |
| 1                          | 2.891524000  | -0.211571000 | -1.290072000 | 1                          | -2.968511000 | -1.033293000 | -0.601270000 |

| 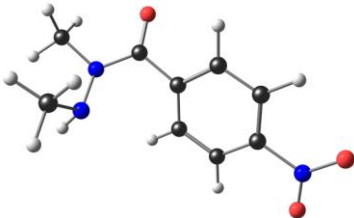<br><b>12</b><br><b>E-ac-bH</b> |              |              |              | <br><b>12</b><br><b>E-ac-fH</b> |              |              |              |
|--------------------------------------------------------------------------------------------------------------------|--------------|--------------|--------------|---------------------------------------------------------------------------------------------------------------------|--------------|--------------|--------------|
| 8                                                                                                                  | 2.179914000  | -2.026613000 | -0.363476000 | 8                                                                                                                   | 2.106836000  | -2.119365000 | -0.540208000 |
| 7                                                                                                                  | 2.790281000  | 0.141015000  | -0.387145000 | 7                                                                                                                   | 2.800332000  | -0.030593000 | -0.030783000 |
| 7                                                                                                                  | 2.468820000  | 1.405954000  | 0.127123000  | 7                                                                                                                   | 2.488591000  | 1.079742000  | 0.768390000  |
| 6                                                                                                                  | -0.163988000 | 0.590244000  | -0.893254000 | 6                                                                                                                   | -0.089465000 | 0.673298000  | -0.567212000 |
| 6                                                                                                                  | -1.527153000 | 0.820186000  | -0.822666000 | 6                                                                                                                   | -1.443801000 | 0.955425000  | -0.524878000 |
| 6                                                                                                                  | -2.299465000 | -0.024787000 | -0.043572000 | 6                                                                                                                   | -2.302736000 | -0.009289000 | -0.026158000 |
| 6                                                                                                                  | -1.767501000 | -1.101022000 | 0.642564000  | 6                                                                                                                   | -1.863329000 | -1.247790000 | 0.404605000  |
| 6                                                                                                                  | -0.405359000 | -1.333234000 | 0.541188000  | 6                                                                                                                   | -0.507481000 | -1.523327000 | 0.332722000  |
| 6                                                                                                                  | 0.401399000  | -0.481815000 | -0.207503000 | 6                                                                                                                   | 0.383747000  | -0.561917000 | -0.133278000 |
| 6                                                                                                                  | 1.853127000  | -0.857406000 | -0.315216000 | 6                                                                                                                   | 1.824449000  | -0.977784000 | -0.239853000 |
| 6                                                                                                                  | 4.189186000  | -0.265830000 | -0.437945000 | 6                                                                                                                   | 4.184886000  | -0.478167000 | -0.069402000 |
| 6                                                                                                                  | 2.915686000  | 1.594860000  | 1.505186000  | 6                                                                                                                   | 3.006724000  | 2.333567000  | 0.236997000  |
| 1                                                                                                                  | 0.460893000  | 1.239914000  | -1.488744000 | 1                                                                                                                   | 0.598695000  | 1.412109000  | -0.951946000 |
| 1                                                                                                                  | -1.996353000 | 1.636887000  | -1.352012000 | 1                                                                                                                   | -1.840043000 | 1.900930000  | -0.865993000 |
| 1                                                                                                                  | -2.414153000 | -1.737377000 | 1.229408000  | 1                                                                                                                   | -2.574697000 | -1.971131000 | 0.776386000  |
| 1                                                                                                                  | 0.048252000  | -2.184348000 | 1.032113000  | 1                                                                                                                   | -0.124481000 | -2.490646000 | 0.630119000  |
| 1                                                                                                                  | 4.537246000  | -0.663336000 | 0.519048000  | 1                                                                                                                   | 4.476937000  | -0.932123000 | 0.883486000  |
| 1                                                                                                                  | 4.302797000  | -1.042331000 | -1.189749000 | 1                                                                                                                   | 4.296309000  | -1.220209000 | -0.854310000 |
| 1                                                                                                                  | 4.786996000  | 0.603094000  | -0.713129000 | 1                                                                                                                   | 4.830026000  | 0.372388000  | -0.280031000 |
| 1                                                                                                                  | 3.994473000  | 1.466555000  | 1.643807000  | 1                                                                                                                   | 4.096656000  | 2.367818000  | 0.137555000  |
| 1                                                                                                                  | 2.636781000  | 2.601481000  | 1.814774000  | 1                                                                                                                   | 2.566136000  | 2.510943000  | -0.744362000 |
| 1                                                                                                                  | 2.388798000  | 0.882116000  | 2.140969000  | 1                                                                                                                   | 2.694189000  | 3.134617000  | 0.906376000  |
| 7                                                                                                                  | -3.749437000 | 0.229473000  | 0.051298000  | 7                                                                                                                   | -3.744661000 | 0.294341000  | 0.039983000  |
| 8                                                                                                                  | -4.406057000 | -0.520260000 | 0.742010000  | 8                                                                                                                   | -4.479661000 | -0.566887000 | 0.473852000  |

|   |              |             |              |   |              |             |              |
|---|--------------|-------------|--------------|---|--------------|-------------|--------------|
| 8 | -4.195106000 | 1.173444000 | -0.566474000 | 8 | -4.105732000 | 1.387459000 | -0.342442000 |
| 1 | 2.881034000  | 2.102495000 | -0.484599000 | 1 | 2.840933000  | 0.917127000 | 1.708717000  |

|                                                                                                                                                   |              |              |              |                                                                                                                                                    |              |              |              |
|---------------------------------------------------------------------------------------------------------------------------------------------------|--------------|--------------|--------------|----------------------------------------------------------------------------------------------------------------------------------------------------|--------------|--------------|--------------|
| 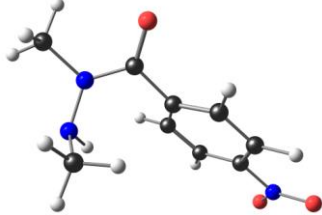 <p style="text-align: center;"><b>12</b><br/><b>E-sc-bH</b></p> |              |              |              |  <p style="text-align: center;"><b>12</b><br/><b>E-sc-fH</b></p> |              |              |              |
| 8                                                                                                                                                 | -2.311679000 | -1.950228000 | 0.460465000  | 8                                                                                                                                                  | 2.311778000  | -1.950277000 | 0.460224000  |
| 7                                                                                                                                                 | -2.813033000 | 0.260062000  | 0.353541000  | 7                                                                                                                                                  | 2.813004000  | 0.260078000  | 0.353482000  |
| 7                                                                                                                                                 | -2.525949000 | 1.486142000  | -0.278226000 | 7                                                                                                                                                  | 2.525866000  | 1.486162000  | -0.278164000 |
| 6                                                                                                                                                 | 0.123063000  | 0.475052000  | 1.043767000  | 6                                                                                                                                                  | -0.297182000 | -1.248574000 | -0.634869000 |
| 6                                                                                                                                                 | 1.490217000  | 0.692241000  | 0.974685000  | 6                                                                                                                                                  | -1.661694000 | -1.031174000 | -0.728376000 |
| 6                                                                                                                                                 | 2.228326000  | -0.058842000 | 0.077434000  | 6                                                                                                                                                  | -2.228298000 | -0.058873000 | 0.077474000  |
| 6                                                                                                                                                 | 1.661653000  | -1.030983000 | -0.728560000 | 6                                                                                                                                                  | -1.490168000 | 0.692277000  | 0.974637000  |
| 6                                                                                                                                                 | 0.297134000  | -1.248383000 | -0.635019000 | 6                                                                                                                                                  | -0.123017000 | 0.475015000  | 1.043754000  |
| 6                                                                                                                                                 | -0.476919000 | -0.483636000 | 0.232339000  | 6                                                                                                                                                  | 0.476918000  | -0.483742000 | 0.232403000  |
| 6                                                                                                                                                 | -1.944365000 | -0.800422000 | 0.335462000  | 6                                                                                                                                                  | 1.944355000  | -0.800495000 | 0.335410000  |
| 6                                                                                                                                                 | -4.233146000 | -0.023491000 | 0.490214000  | 6                                                                                                                                                  | 4.233119000  | -0.023462000 | 0.490195000  |
| 6                                                                                                                                                 | -2.303861000 | 1.359755000  | -1.715570000 | 6                                                                                                                                                  | 2.303813000  | 1.359937000  | -1.715525000 |
| 1                                                                                                                                                 | -0.475201000 | 1.031180000  | 1.756424000  | 1                                                                                                                                                  | 0.181112000  | -2.019272000 | -1.225972000 |
| 1                                                                                                                                                 | 1.986016000  | 1.420796000  | 1.600025000  | 1                                                                                                                                                  | -2.287323000 | -1.601290000 | -1.400181000 |
| 1                                                                                                                                                 | 2.287251000  | -1.600991000 | -1.400488000 | 1                                                                                                                                                  | -1.985930000 | 1.420932000  | 1.599880000  |
| 1                                                                                                                                                 | -0.181153000 | -2.019013000 | -1.226225000 | 1                                                                                                                                                  | 0.475256000  | 1.031146000  | 1.756406000  |
| 1                                                                                                                                                 | -4.676823000 | -0.324754000 | -0.463286000 | 1                                                                                                                                                  | 4.718369000  | 0.880862000  | 0.848298000  |
| 1                                                                                                                                                 | -4.363605000 | -0.835639000 | 1.200388000  | 1                                                                                                                                                  | 4.363590000  | -0.835417000 | 1.200517000  |
| 1                                                                                                                                                 | -4.718461000 | 0.880740000  | 0.848407000  | 1                                                                                                                                                  | 4.676828000  | -0.324868000 | -0.463259000 |
| 1                                                                                                                                                 | -3.206714000 | 0.957654000  | -2.175630000 | 1                                                                                                                                                  | 1.455193000  | 0.717131000  | -1.976064000 |
| 1                                                                                                                                                 | -2.132437000 | 2.356631000  | -2.121161000 | 1                                                                                                                                                  | 2.132114000  | 2.356824000  | -2.120974000 |
| 1                                                                                                                                                 | -1.455047000 | 0.717173000  | -1.976004000 | 1                                                                                                                                                  | 3.206778000  | 0.958158000  | -2.175652000 |
| 7                                                                                                                                                 | 3.682033000  | 0.179188000  | -0.013842000 | 1                                                                                                                                                  | 1.740145000  | 1.927655000  | 0.179998000  |
| 8                                                                                                                                                 | 4.307828000  | -0.484011000 | -0.812295000 | 7                                                                                                                                                  | -3.682007000 | 0.179253000  | -0.013863000 |
| 8                                                                                                                                                 | 4.156664000  | 1.024616000  | 0.714174000  | 8                                                                                                                                                  | -4.156442000 | 1.025477000  | 0.713358000  |
| 1                                                                                                                                                 | -1.740292000 | 1.927707000  | 0.179973000  | 8                                                                                                                                                  | -4.307993000 | -0.484673000 | -0.811557000 |

|                                                                                                                                                     |              |              |              |                                                                                                                                                      |              |              |              |
|-----------------------------------------------------------------------------------------------------------------------------------------------------|--------------|--------------|--------------|------------------------------------------------------------------------------------------------------------------------------------------------------|--------------|--------------|--------------|
| 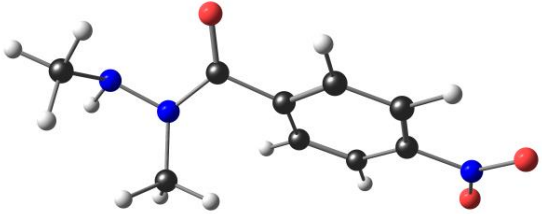 <p style="text-align: center;"><b>12</b><br/><b>Z-ac-bH</b></p> |              |              |              |  <p style="text-align: center;"><b>12</b><br/><b>Z-ac-fH</b></p> |              |              |              |
| 8                                                                                                                                                   | 2.169950000  | 1.550477000  | 0.847906000  | 8                                                                                                                                                    | -2.042096000 | 1.924396000  | -0.608677000 |
| 7                                                                                                                                                   | 2.602978000  | -0.543758000 | 0.081711000  | 7                                                                                                                                                    | -2.626849000 | -0.136356000 | 0.185939000  |
| 7                                                                                                                                                   | 3.954251000  | -0.359253000 | 0.423769000  | 7                                                                                                                                                    | -3.966402000 | 0.160659000  | -0.104195000 |
| 6                                                                                                                                                   | -0.328855000 | -0.916296000 | 0.587032000  | 6                                                                                                                                                    | 0.202100000  | -0.793776000 | -0.427245000 |
| 6                                                                                                                                                   | -1.704791000 | -1.046241000 | 0.489484000  | 6                                                                                                                                                    | 1.560814000  | -1.064553000 | -0.416360000 |
| 6                                                                                                                                                   | -2.432161000 | 0.028685000  | 0.010494000  | 6                                                                                                                                                    | 2.428475000  | -0.051321000 | -0.048766000 |
| 6                                                                                                                                                   | -1.843920000 | 1.228539000  | -0.350210000 | 6                                                                                                                                                    | 1.994729000  | 1.220032000  | 0.285415000  |
| 6                                                                                                                                                   | -0.469675000 | 1.348628000  | -0.228869000 | 6                                                                                                                                                    | 0.634954000  | 1.480210000  | 0.249839000  |
| 6                                                                                                                                                   | 0.292433000  | 0.274302000  | 0.219383000  | 6                                                                                                                                                    | -0.264097000 | 0.473531000  | -0.087635000 |
| 6                                                                                                                                                   | 1.770679000  | 0.497356000  | 0.402034000  | 6                                                                                                                                                    | -1.722158000 | 0.841988000  | -0.181023000 |

|   |              |              |              |   |              |              |              |
|---|--------------|--------------|--------------|---|--------------|--------------|--------------|
| 6 | 2.317699000  | -1.564646000 | -0.917343000 | 6 | -2.386214000 | -1.046324000 | 1.302138000  |
| 6 | 4.700158000  | 0.406031000  | -0.571116000 | 6 | -4.728342000 | -1.022098000 | -0.470880000 |
| 1 | 0.263620000  | -1.739631000 | 0.967024000  | 1 | -0.500053000 | -1.566222000 | -0.716369000 |
| 1 | -2.216289000 | -1.953530000 | 0.777107000  | 1 | 1.952832000  | -2.034105000 | -0.687799000 |
| 1 | -2.460389000 | 2.041445000  | -0.706178000 | 1 | 2.715252000  | 1.978812000  | 0.555270000  |
| 1 | 0.028812000  | 2.279365000  | -0.466518000 | 1 | 0.253097000  | 2.468531000  | 0.470856000  |
| 1 | 2.411489000  | -2.562211000 | -0.480047000 | 1 | -2.602811000 | -2.078292000 | 1.021623000  |
| 1 | 1.314930000  | -1.449814000 | -1.318067000 | 1 | -1.353270000 | -0.985128000 | 1.631304000  |
| 1 | 3.026357000  | -1.475987000 | -1.743626000 | 1 | -3.031950000 | -0.768728000 | 2.141506000  |
| 1 | 4.629774000  | 0.004300000  | -1.589061000 | 1 | -4.266578000 | -1.474425000 | -1.348669000 |
| 1 | 4.327924000  | 1.429071000  | -0.558454000 | 1 | -4.807681000 | -1.779216000 | 0.318842000  |
| 1 | 5.747353000  | 0.415082000  | -0.270682000 | 1 | -5.733014000 | -0.699236000 | -0.741287000 |
| 7 | -3.896483000 | -0.108219000 | -0.112419000 | 7 | 3.876129000  | -0.337147000 | -0.019820000 |
| 8 | -4.513828000 | 0.845047000  | -0.536046000 | 8 | 4.617020000  | 0.561895000  | 0.314811000  |
| 8 | -4.388936000 | -1.166590000 | 0.216117000  | 8 | 4.232497000  | -1.453754000 | -0.331055000 |
| 1 | 4.354316000  | -1.279082000 | 0.567926000  | 1 | -4.386902000 | 0.641490000  | 0.687722000  |

|                                                                                   |              |              |              |                                                                                    |              |              |              |
|-----------------------------------------------------------------------------------|--------------|--------------|--------------|------------------------------------------------------------------------------------|--------------|--------------|--------------|
| 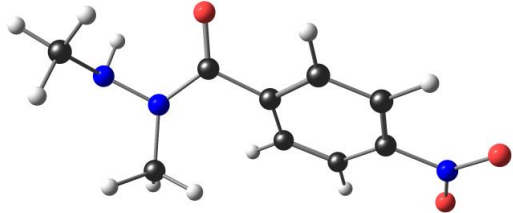 |              |              |              |  |              |              |              |
| <b>12</b>                                                                         |              |              |              | <b>12</b>                                                                          |              |              |              |
| <b>Z-sc-bH</b>                                                                    |              |              |              | <b>Z-sc-fH</b>                                                                     |              |              |              |
| 8                                                                                 | 2.184092000  | -1.458494000 | -0.961283000 | 8                                                                                  | -2.184980000 | 1.697395000  | -0.498115000 |
| 7                                                                                 | 2.620845000  | 0.531522000  | 0.001661000  | 7                                                                                  | -2.639039000 | -0.315688000 | 0.414291000  |
| 7                                                                                 | 3.989232000  | 0.394029000  | -0.306087000 | 7                                                                                  | -4.019012000 | -0.053135000 | 0.286010000  |
| 6                                                                                 | -0.341510000 | 0.933854000  | -0.594620000 | 6                                                                                  | 0.219606000  | -0.864436000 | -0.399106000 |
| 6                                                                                 | -1.718837000 | 1.044089000  | -0.489861000 | 6                                                                                  | 1.591365000  | -1.055118000 | -0.438354000 |
| 6                                                                                 | -2.428172000 | -0.038661000 | -0.002648000 | 6                                                                                  | 2.410468000  | -0.006454000 | -0.059378000 |
| 6                                                                                 | -1.820738000 | -1.228613000 | 0.359189000  | 6                                                                                  | 1.915414000  | 1.224811000  | 0.333942000  |
| 6                                                                                 | -0.445892000 | -1.330211000 | 0.230587000  | 6                                                                                  | 0.542567000  | 1.406316000  | 0.348799000  |
| 6                                                                                 | 0.298364000  | -0.245975000 | -0.225010000 | 6                                                                                  | -0.306909000 | 0.360207000  | 0.002216000  |
| 6                                                                                 | 1.776101000  | -0.448968000 | -0.410834000 | 6                                                                                  | -1.781914000 | 0.643980000  | -0.036901000 |
| 6                                                                                 | 2.314147000  | 1.695450000  | 0.809614000  | 6                                                                                  | -2.335261000 | -1.366147000 | 1.372688000  |
| 6                                                                                 | 4.659352000  | -0.476132000 | 0.667114000  | 6                                                                                  | -4.481238000 | -0.393272000 | -1.062033000 |
| 1                                                                                 | 0.233701000  | 1.765829000  | -0.981676000 | 1                                                                                  | -0.444311000 | -1.666583000 | -0.697594000 |
| 1                                                                                 | -2.244283000 | 1.943231000  | -0.777930000 | 1                                                                                  | 2.029491000  | -1.989916000 | -0.757433000 |
| 1                                                                                 | -2.423655000 | -2.049207000 | 0.720760000  | 1                                                                                  | 2.599245000  | 2.014622000  | 0.609830000  |
| 1                                                                                 | 0.064306000  | -2.254441000 | 0.468709000  | 1                                                                                  | 0.113645000  | 2.363138000  | 0.616872000  |
| 1                                                                                 | 2.349475000  | 2.607733000  | 0.210544000  | 1                                                                                  | -2.633243000 | -2.338095000 | 0.974931000  |
| 1                                                                                 | 1.335807000  | 1.590389000  | 1.269536000  | 1                                                                                  | -1.273673000 | -1.381114000 | 1.600758000  |
| 1                                                                                 | 3.060573000  | 1.775739000  | 1.600583000  | 1                                                                                  | -2.897075000 | -1.178158000 | 2.287916000  |
| 1                                                                                 | 4.666981000  | 0.015655000  | 1.640517000  | 1                                                                                  | -3.922374000 | 0.129606000  | -1.843482000 |
| 1                                                                                 | 4.180910000  | -1.454876000 | 0.752862000  | 1                                                                                  | -4.390724000 | -1.470134000 | -1.205505000 |
| 1                                                                                 | 5.692946000  | -0.601575000 | 0.346383000  | 1                                                                                  | -5.535468000 | -0.126329000 | -1.132515000 |
| 7                                                                                 | -3.893662000 | 0.077123000  | 0.127025000  | 7                                                                                  | 3.872387000  | -0.207630000 | -0.086848000 |
| 8                                                                                 | -4.494448000 | -0.884159000 | 0.556312000  | 8                                                                                  | 4.571409000  | 0.722741000  | 0.251747000  |
| 8                                                                                 | -4.403198000 | 1.127112000  | -0.201979000 | 8                                                                                  | 4.280575000  | -1.291661000 | -0.445355000 |
| 1                                                                                 | 4.019869000  | -0.061865000 | -1.214065000 | 1                                                                                  | -4.126483000 | 0.951008000  | 0.414591000  |

J. NMR Spectra of new synthesized compounds.

Compound 7  
<sup>1</sup>H NMR-400 MHz,  
 CDCl<sub>3</sub>

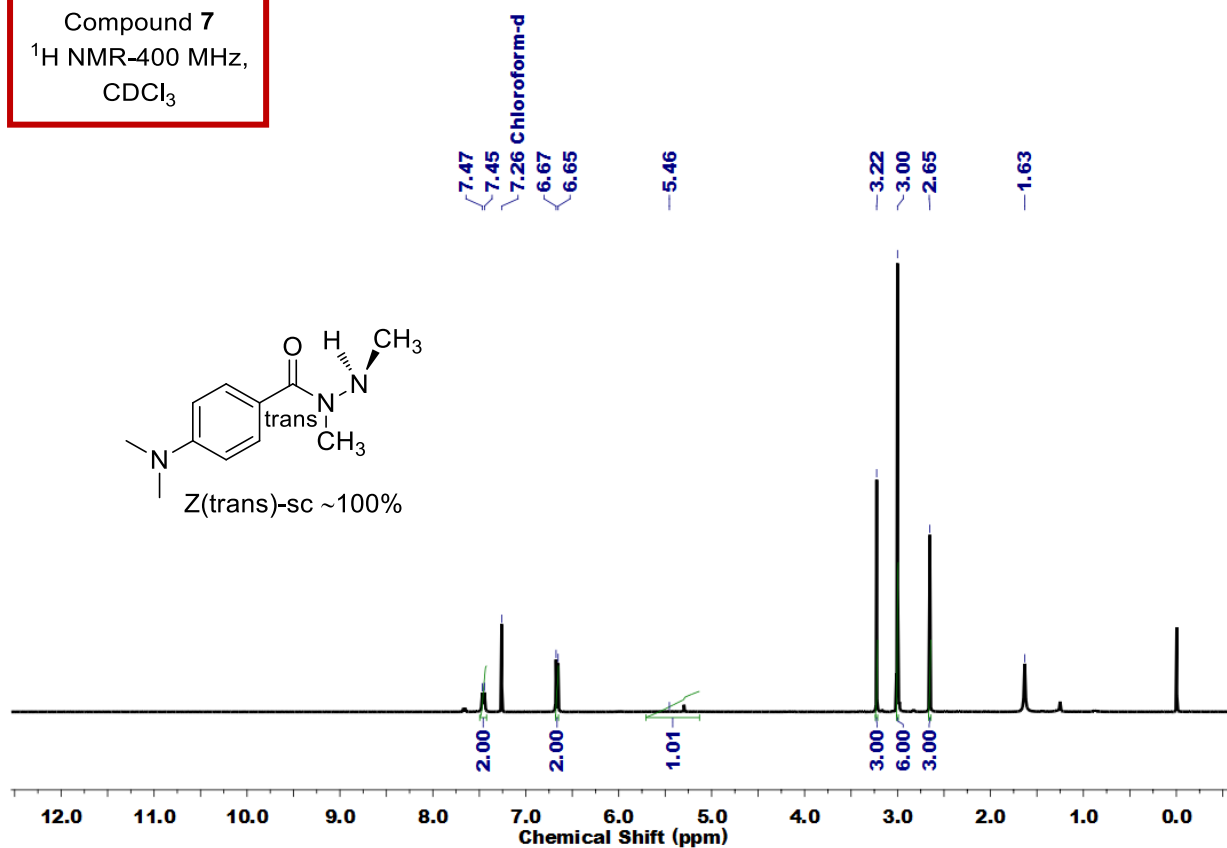

Compound 7  
<sup>13</sup>C NMR-100 MHz,  
 CDCl<sub>3</sub>

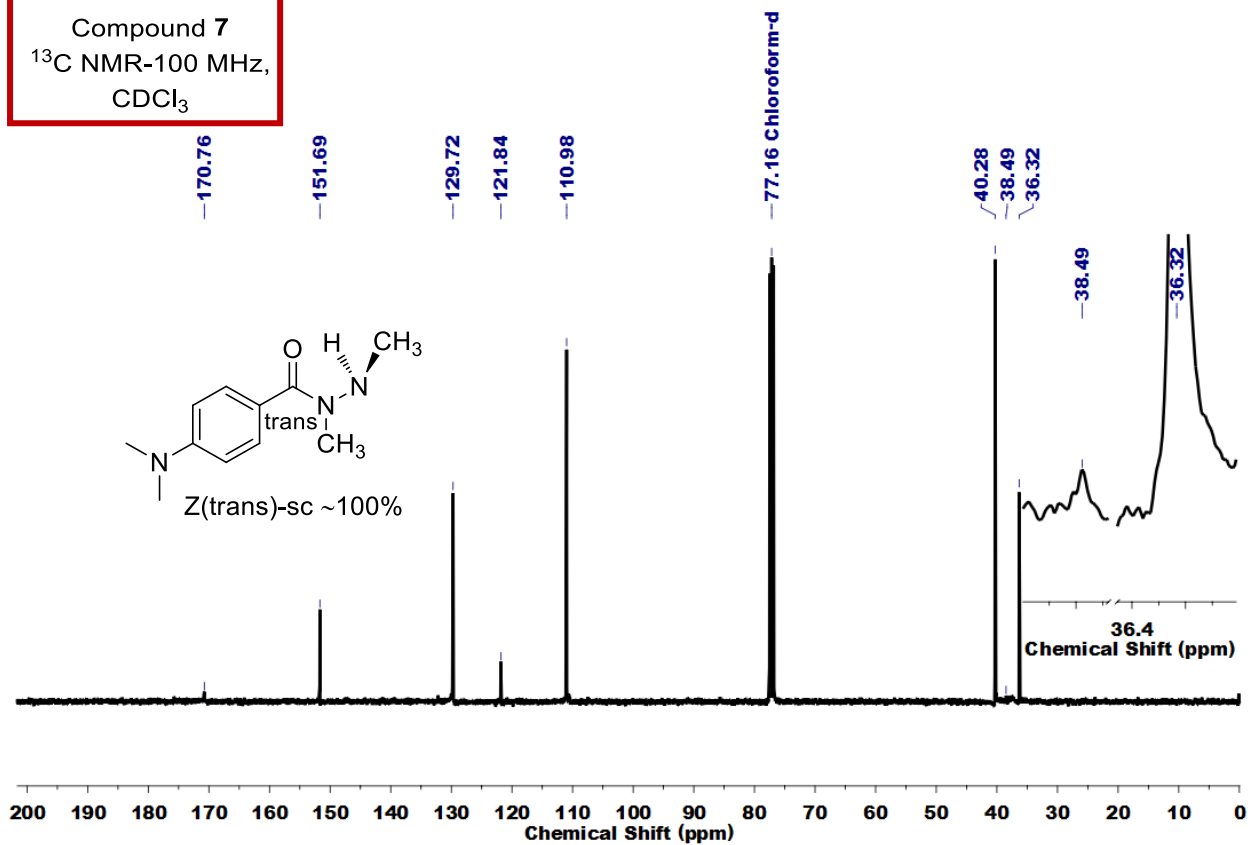

Compound 7  
<sup>1</sup>H NMR-400 MHz,  
 [CD<sub>3</sub>]<sub>2</sub>SO

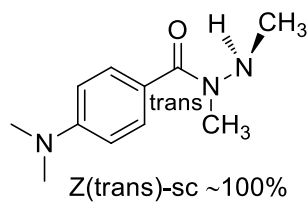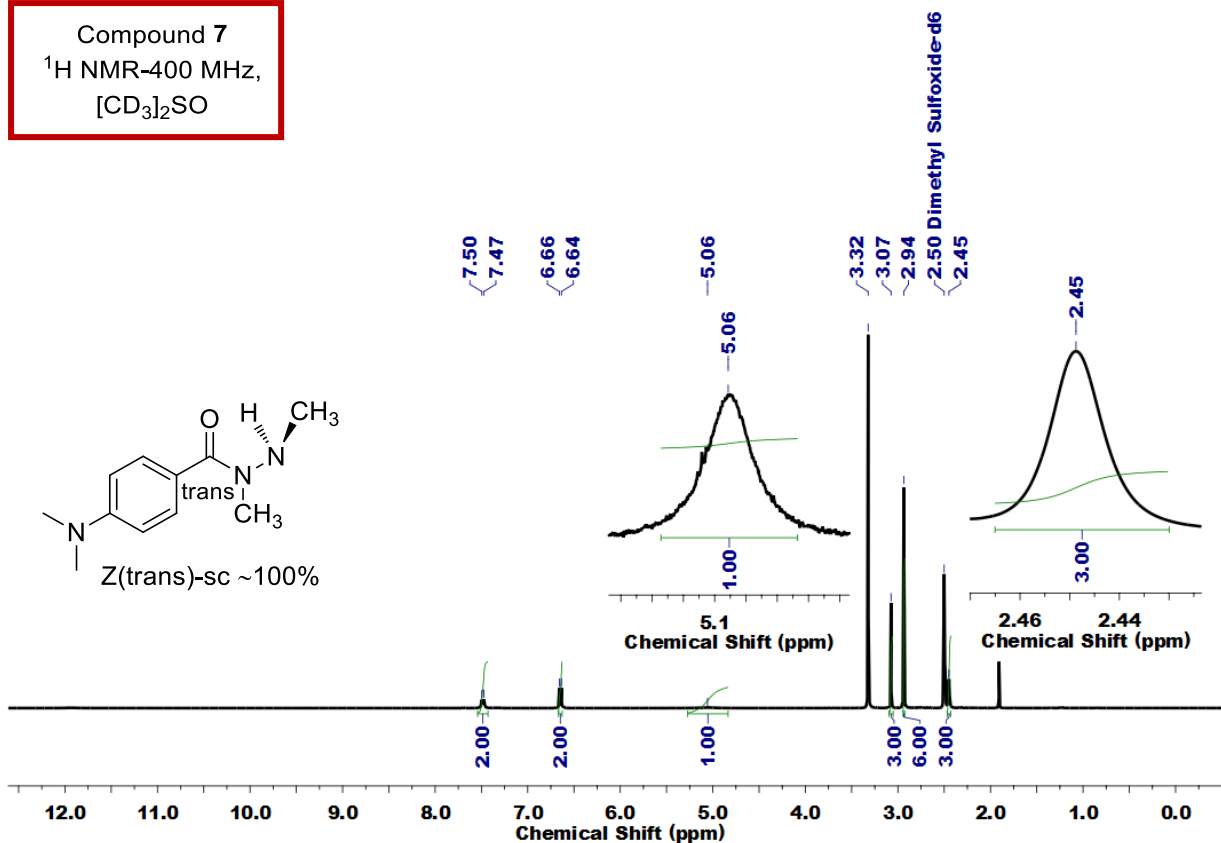

Compound 7  
<sup>1</sup>H NMR-400 MHz,  
 CD<sub>3</sub>OD

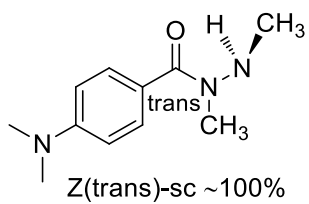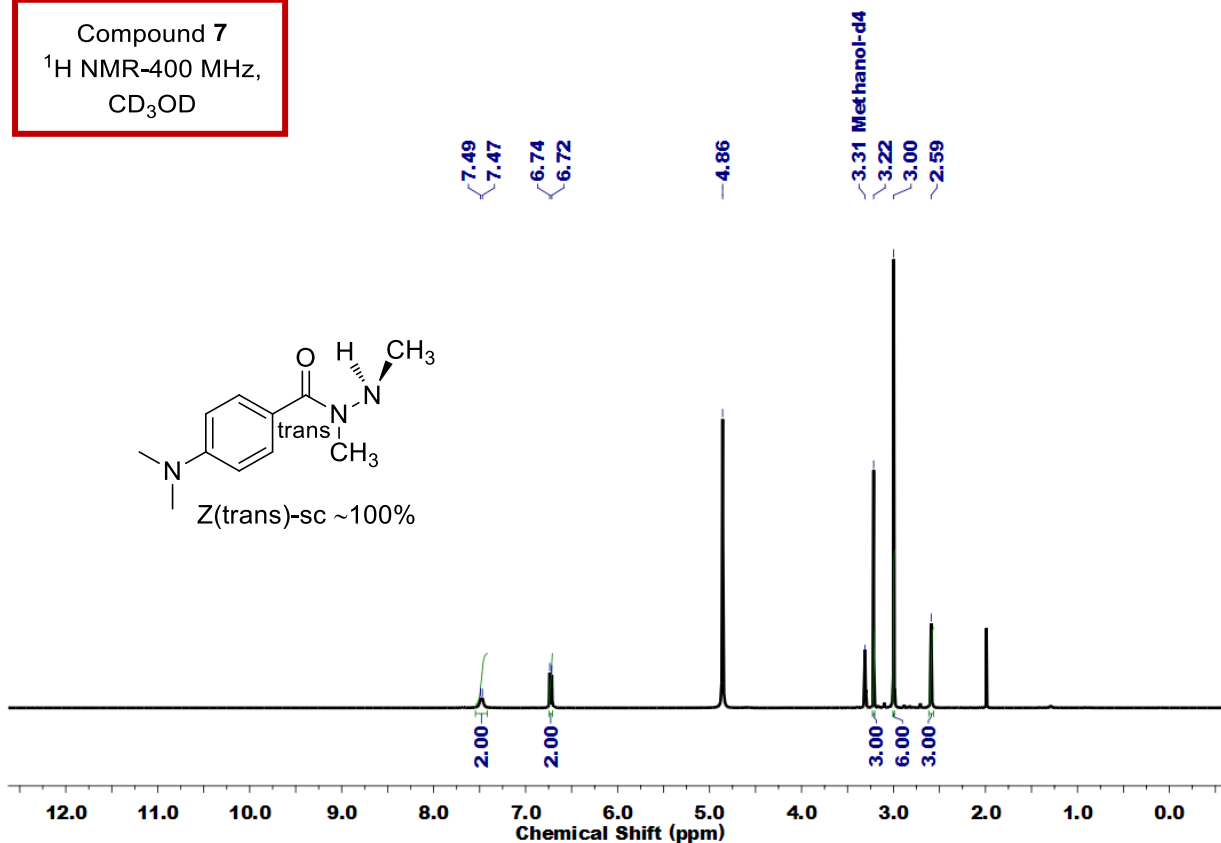

Compound 7  
 $^1\text{H}$  NMR-400 MHz,  
 $\text{CD}_3\text{CN}$

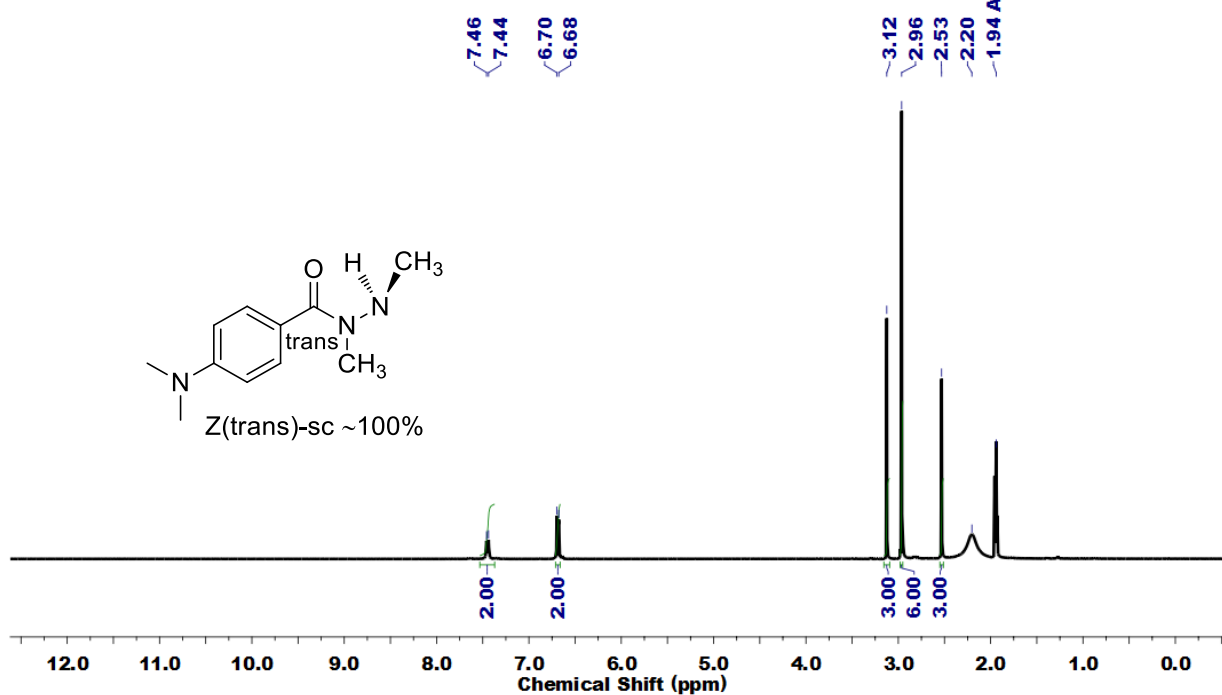

Compound 7  
 $^1\text{H}$  NMR-400 MHz,  
 $\text{D}_2\text{O}$

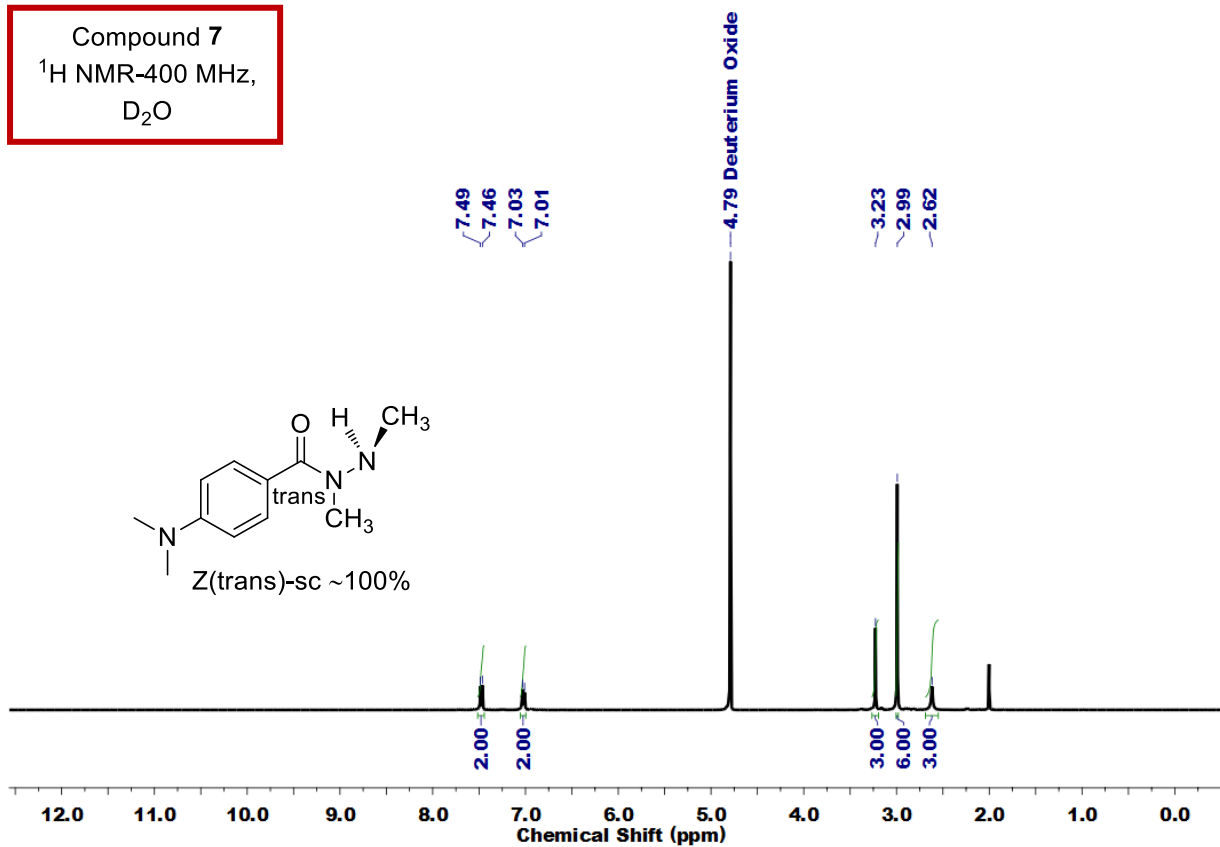



Compound 8  
<sup>1</sup>H NMR-400 MHz,  
CDCl<sub>3</sub>

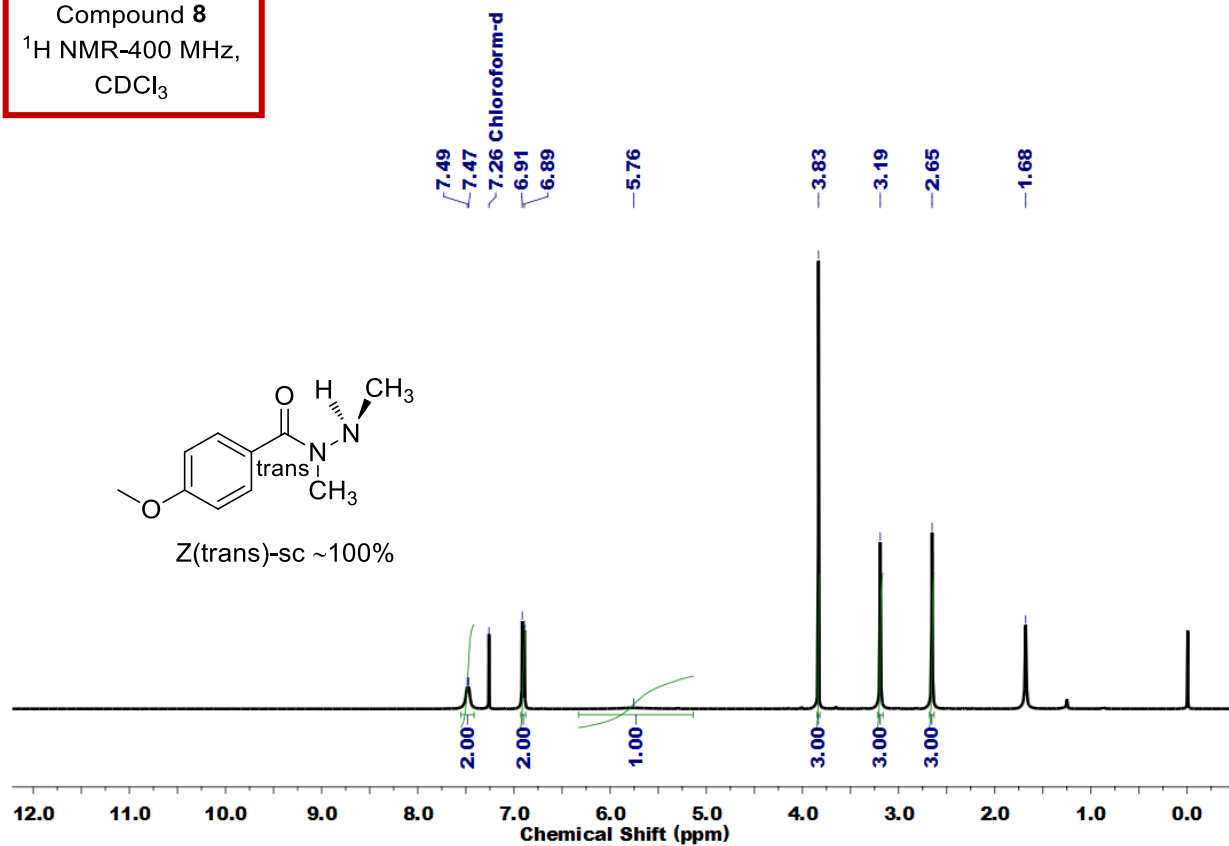

Compound 8  
<sup>13</sup>C NMR-100 MHz,  
CDCl<sub>3</sub>

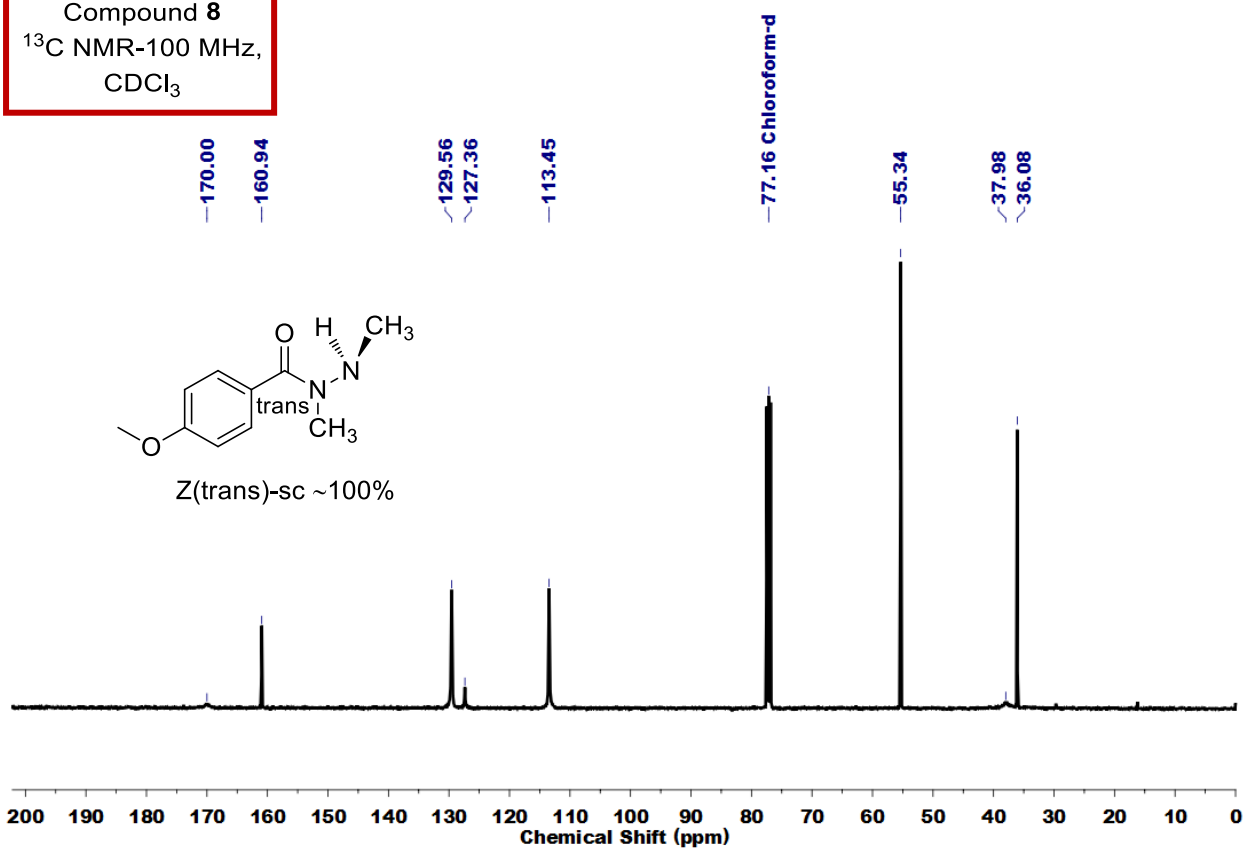

Compound 8  
<sup>1</sup>H NMR-400 MHz,  
 [CD<sub>3</sub>]<sub>2</sub>SO

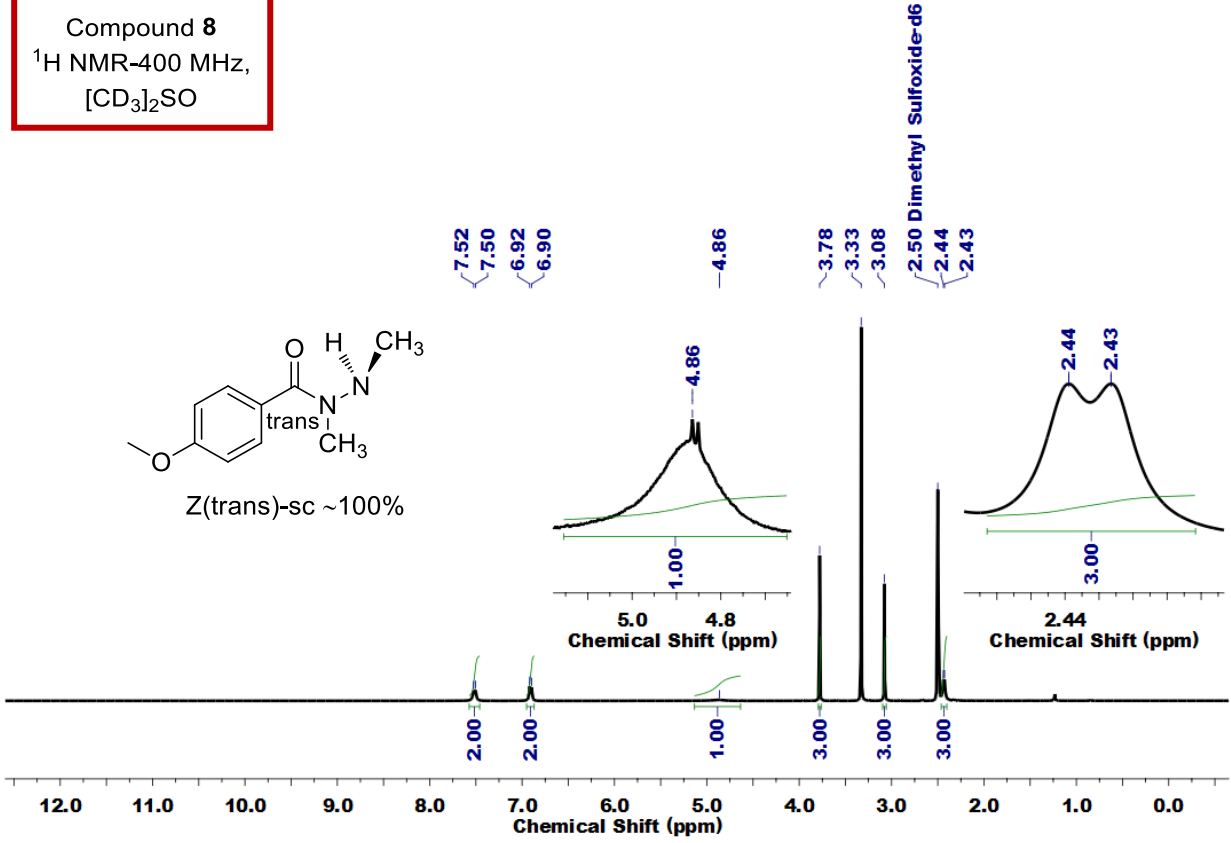

Compound 8  
<sup>1</sup>H NMR-400 MHz,  
 CD<sub>3</sub>OD

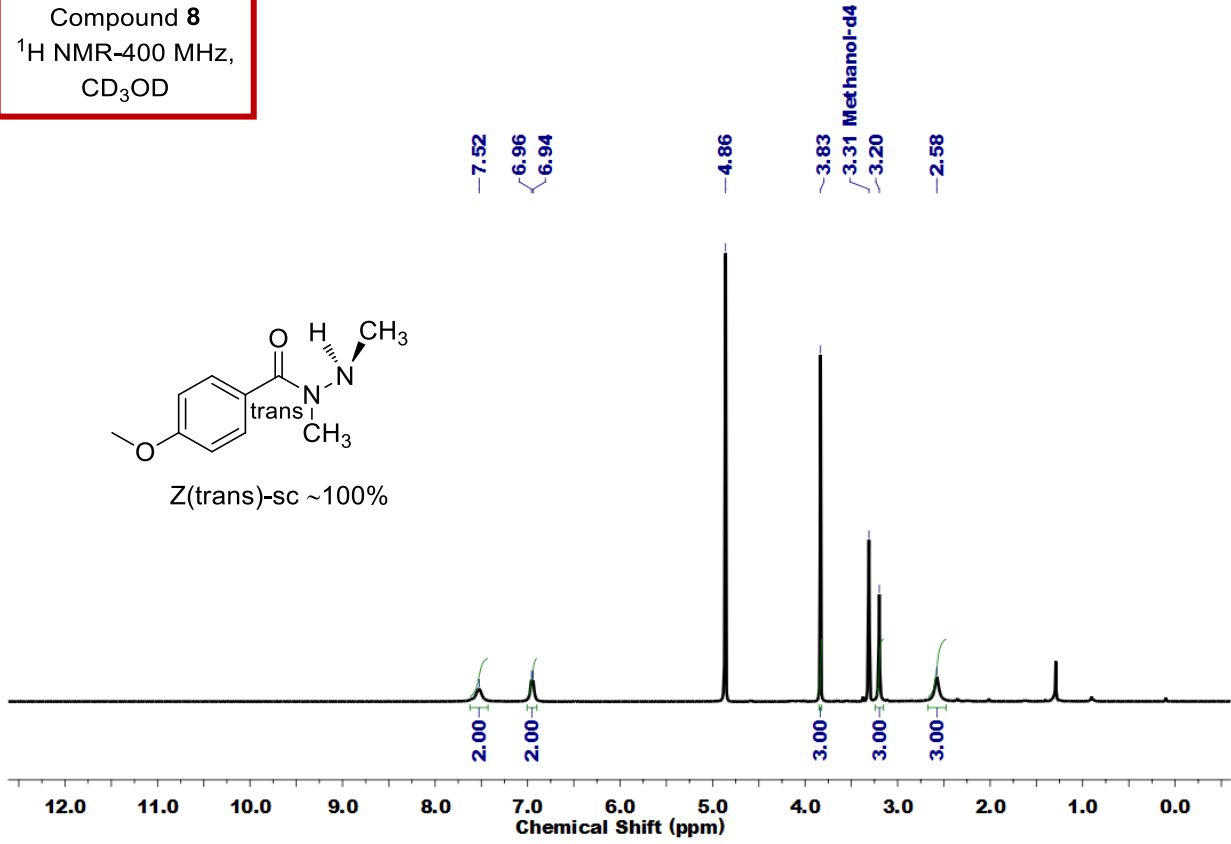

Compound 8  
<sup>1</sup>H NMR-400 MHz,  
 CD<sub>3</sub>CN

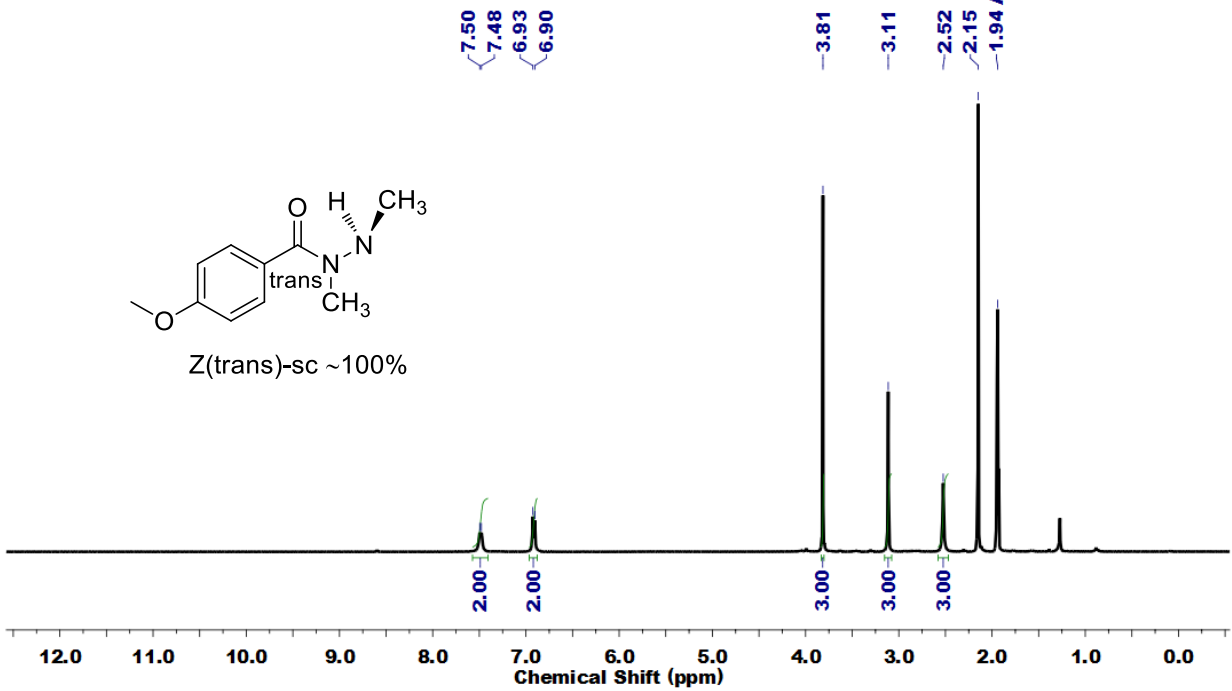

Compound 8  
<sup>1</sup>H NMR-400 MHz,  
 D<sub>2</sub>O

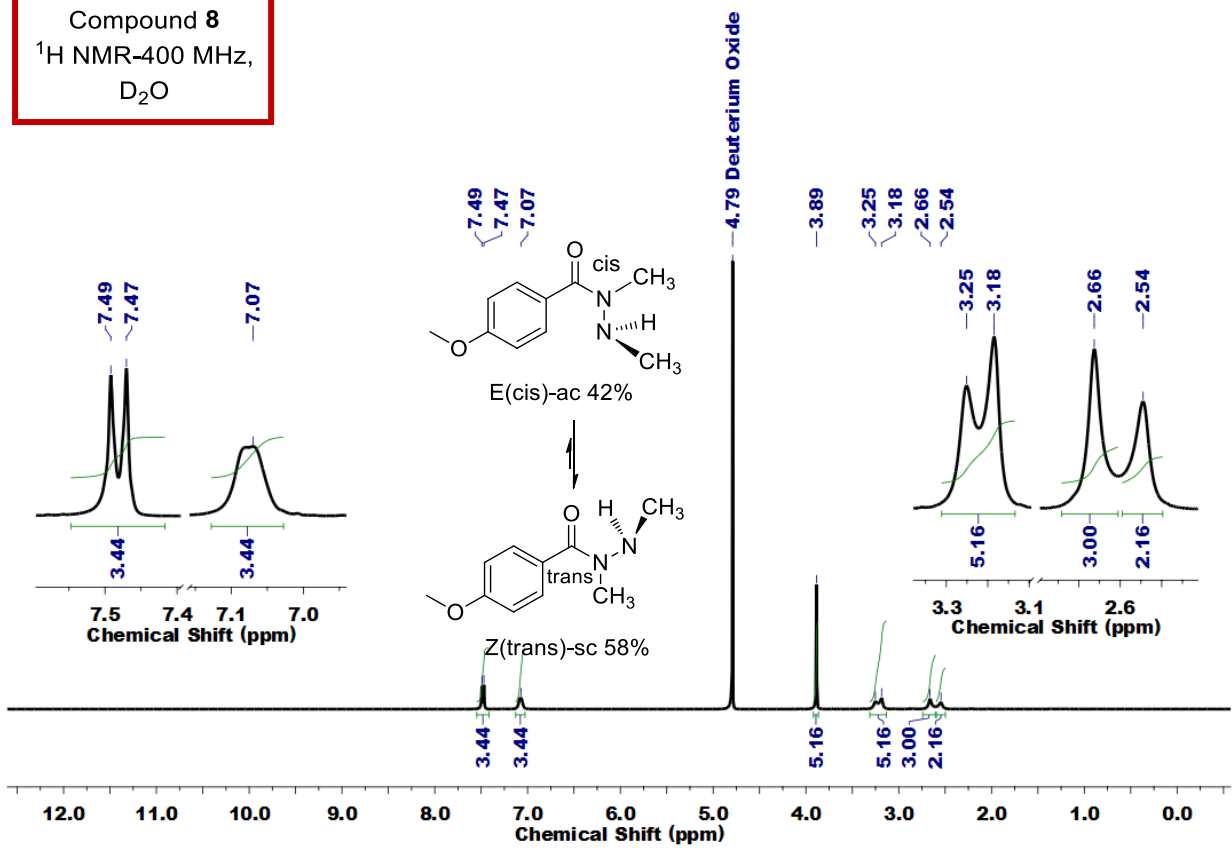

Compound 9  
<sup>1</sup>H NMR-400 MHz,  
CDCl<sub>3</sub>

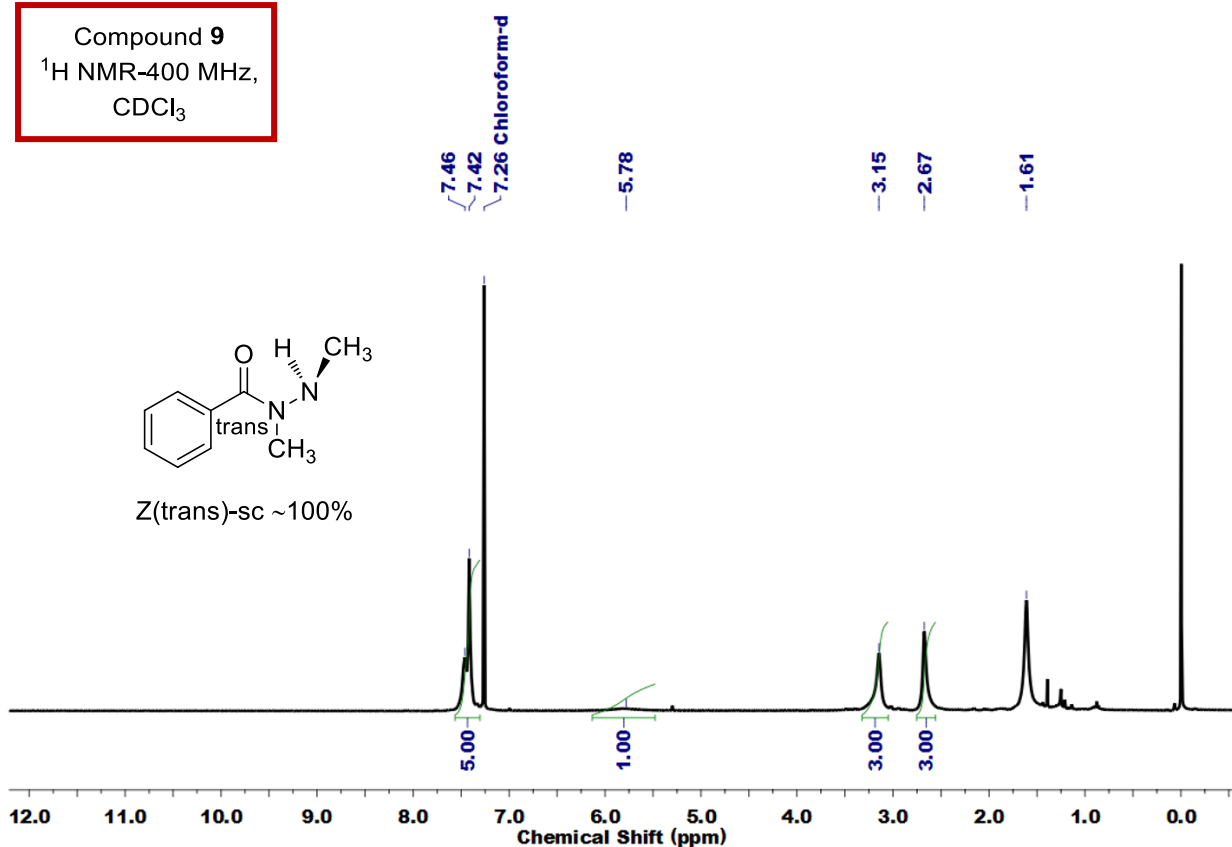

Compound 9  
<sup>13</sup>C NMR-100 MHz,  
CDCl<sub>3</sub>

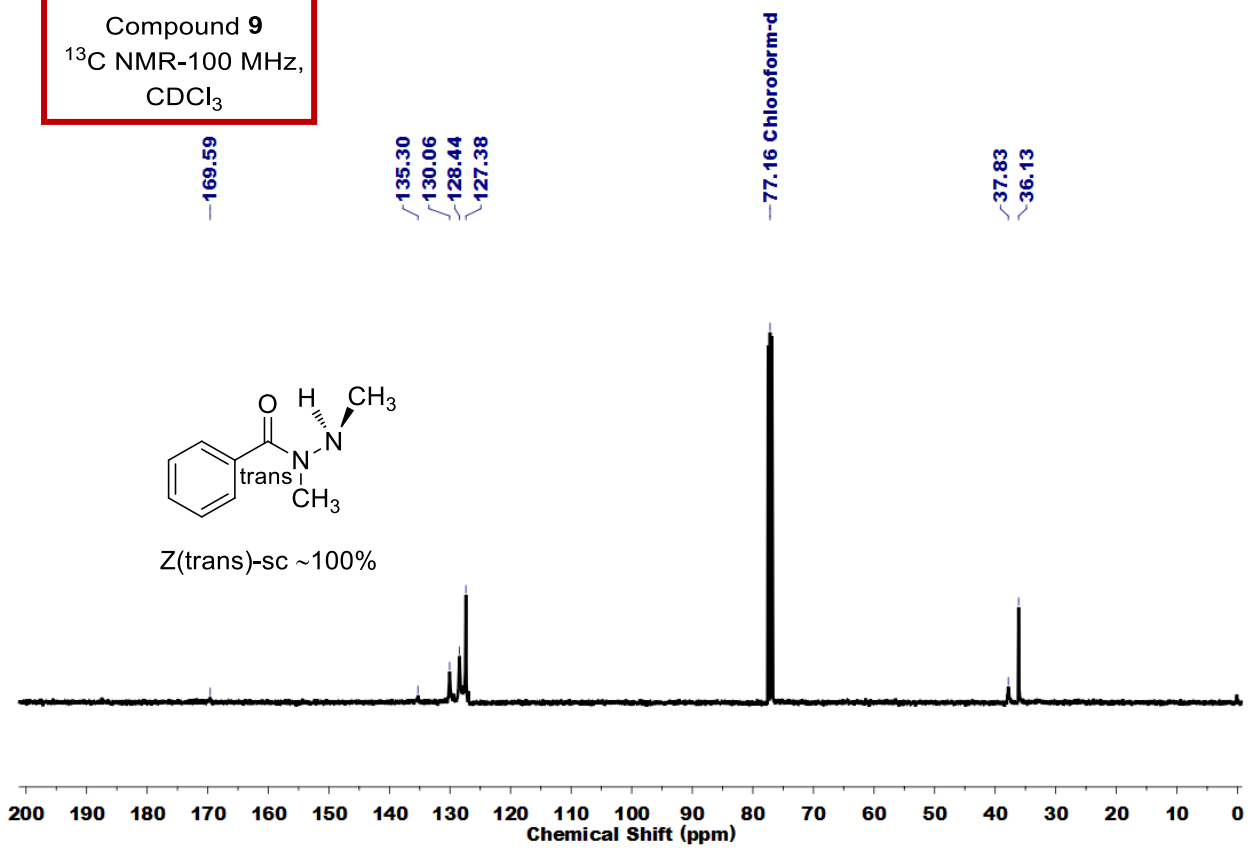

Compound 9  
<sup>1</sup>H NMR-400 MHz,  
 [CD<sub>3</sub>]<sub>2</sub>SO

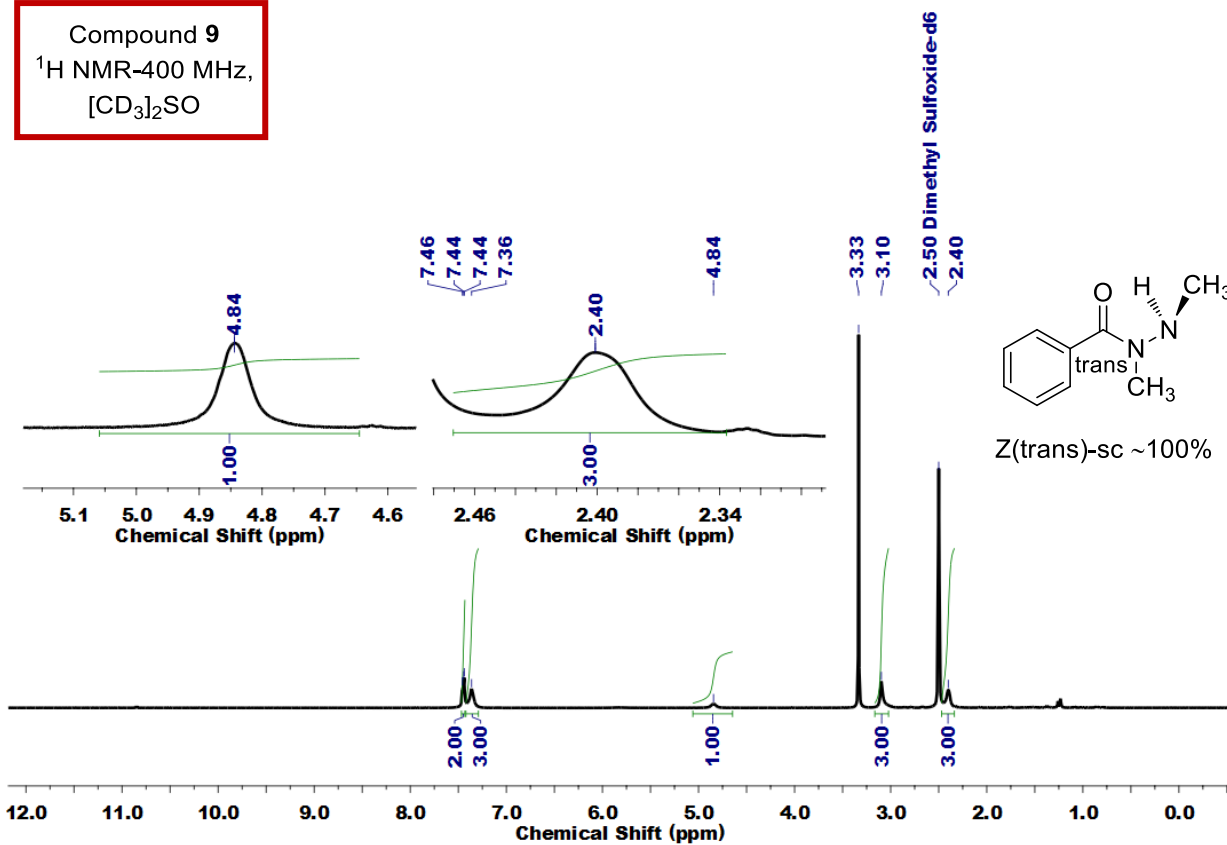

Compound 9  
<sup>1</sup>H NMR-400 MHz,  
 CD<sub>3</sub>OD

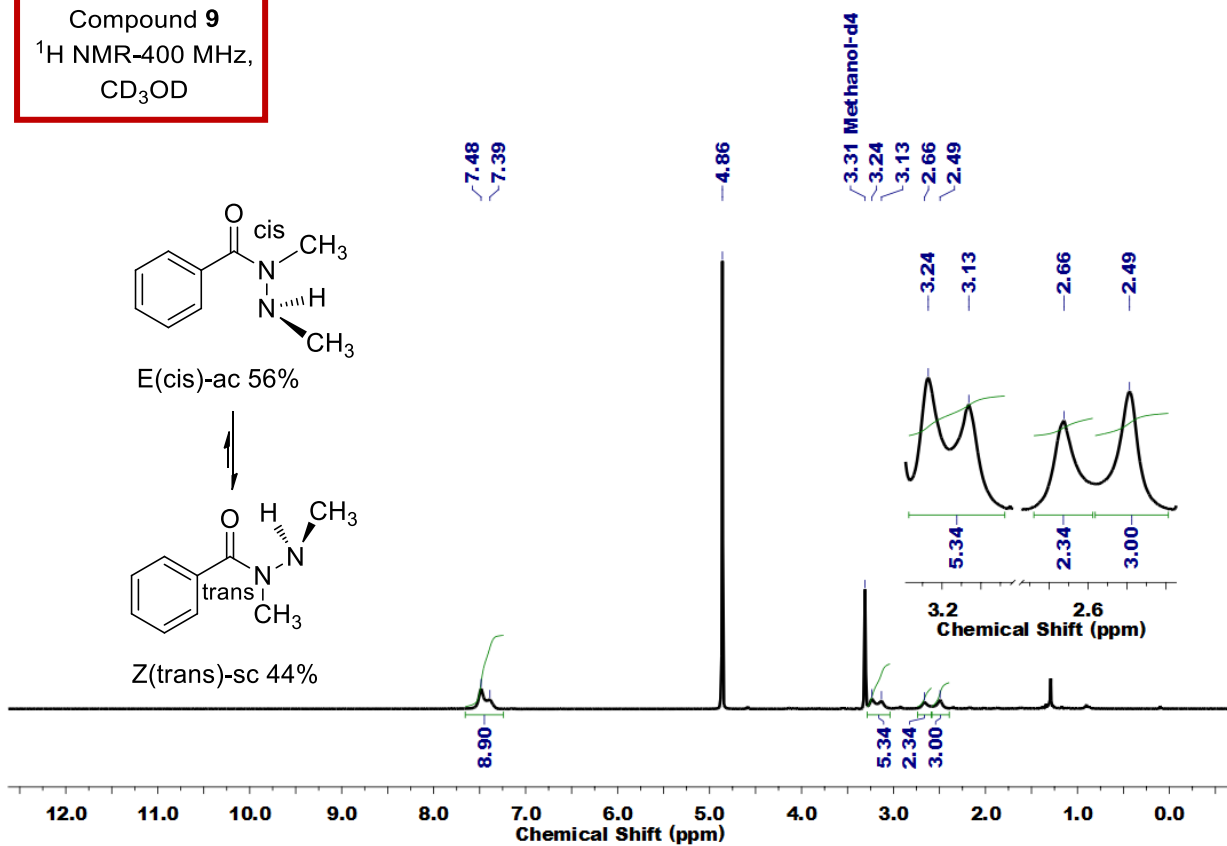

Compound **9**  
<sup>1</sup>H NMR-400 MHz,  
 CD<sub>3</sub>CN

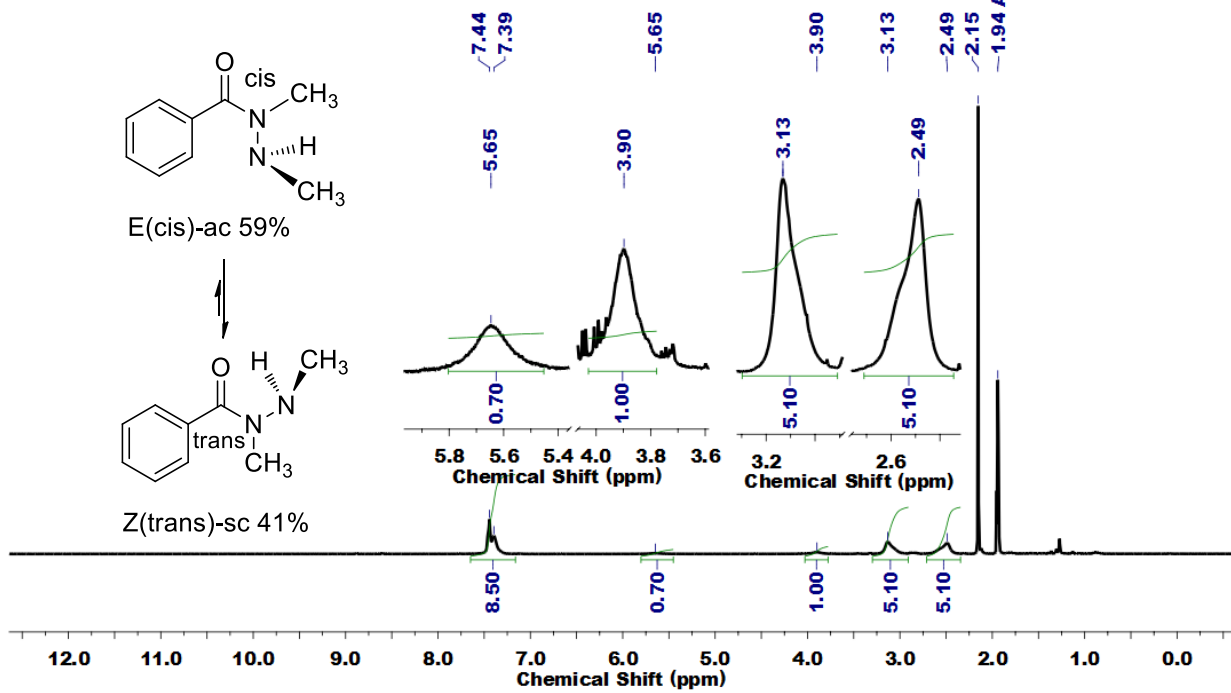

Compound **9**  
<sup>1</sup>H NMR-400 MHz,  
 D<sub>2</sub>O

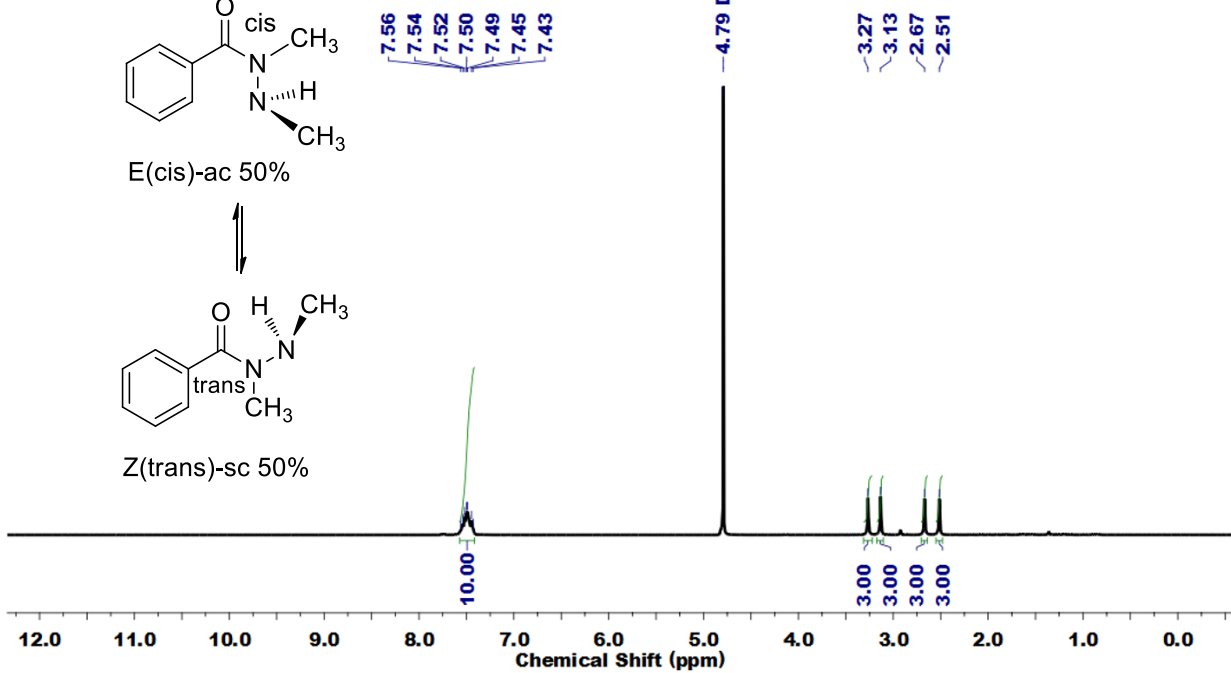

Compound 10  
<sup>1</sup>H NMR-400 MHz,  
 CDCl<sub>3</sub>

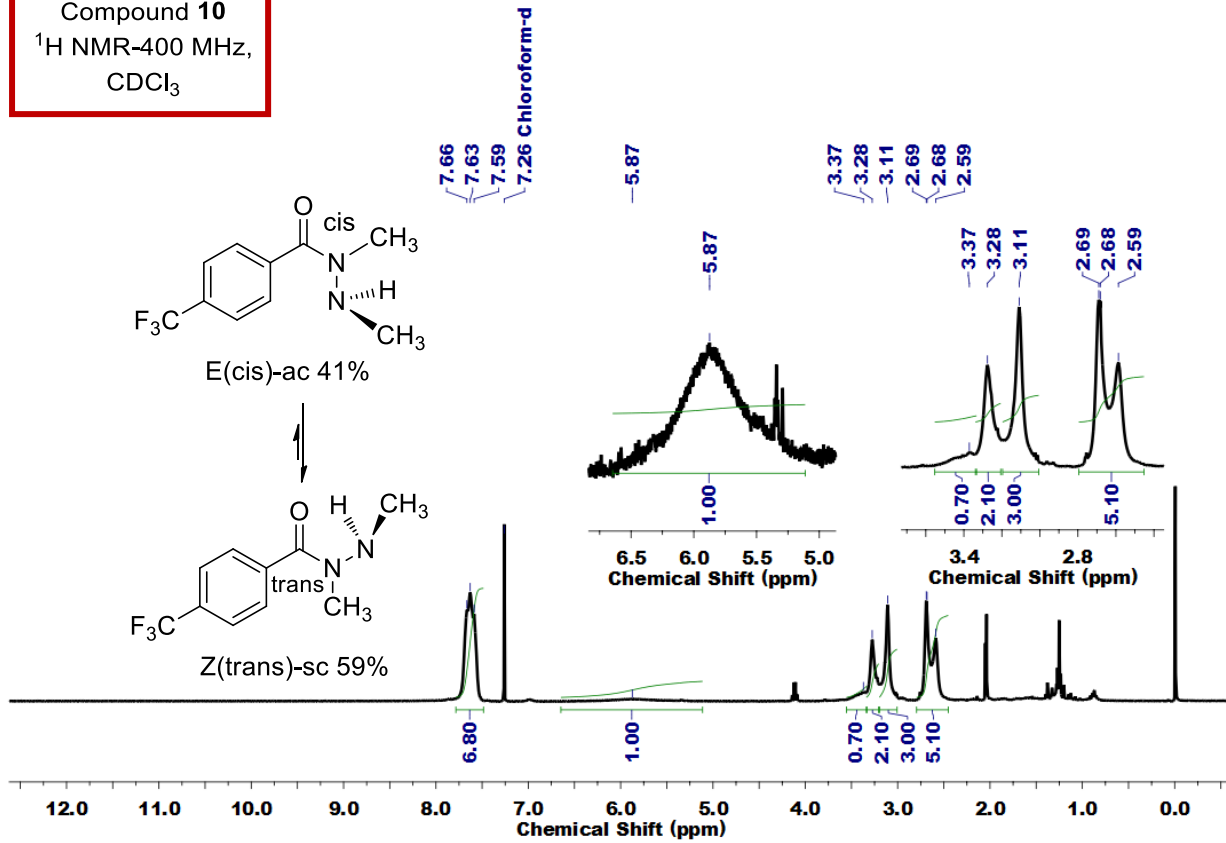

Compound 10  
<sup>13</sup>C NMR-100 MHz,  
 CDCl<sub>3</sub>

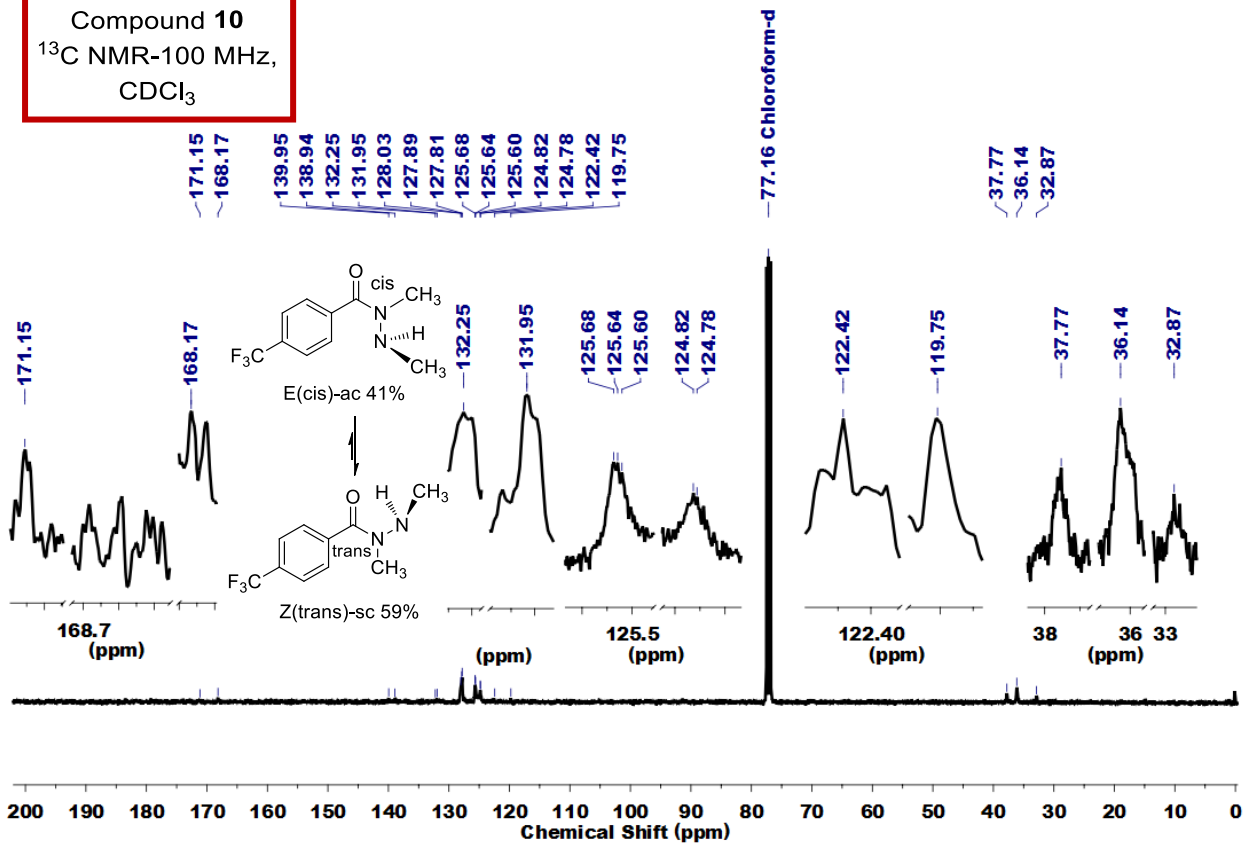

Compound 10  
 $^{19}\text{F}$  NMR-376 MHz,  
 $\text{CDCl}_3$

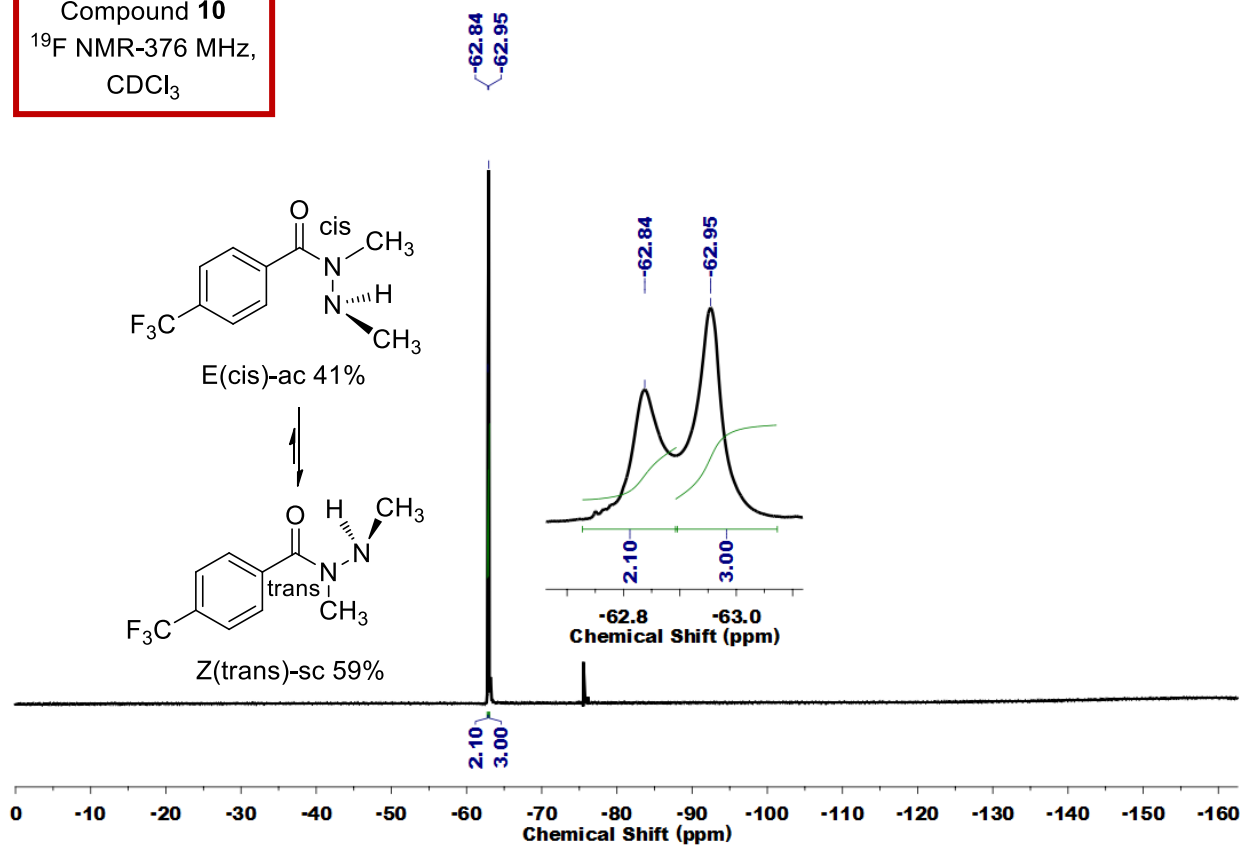

Compound 11  
 $^1\text{H}$  NMR-400 MHz,  
 $[\text{CD}_3]_2\text{SO}$

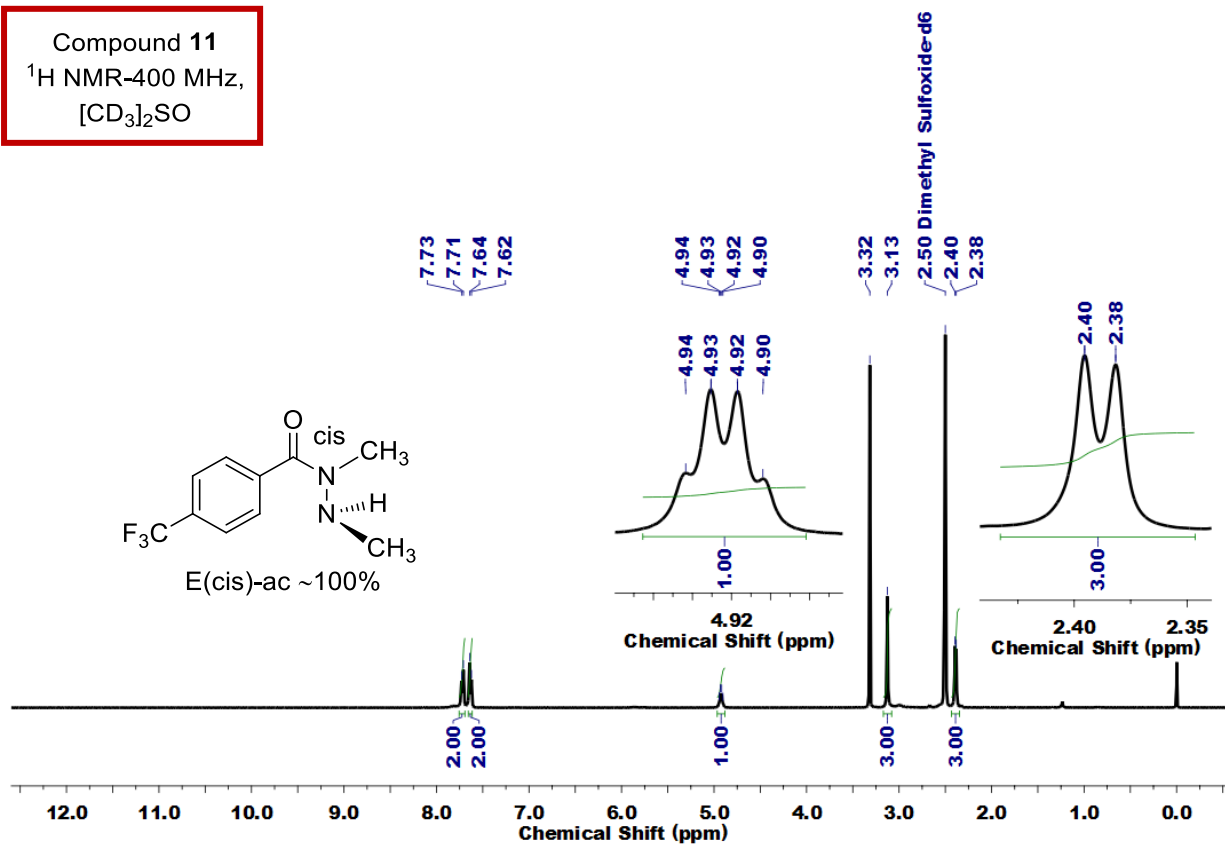



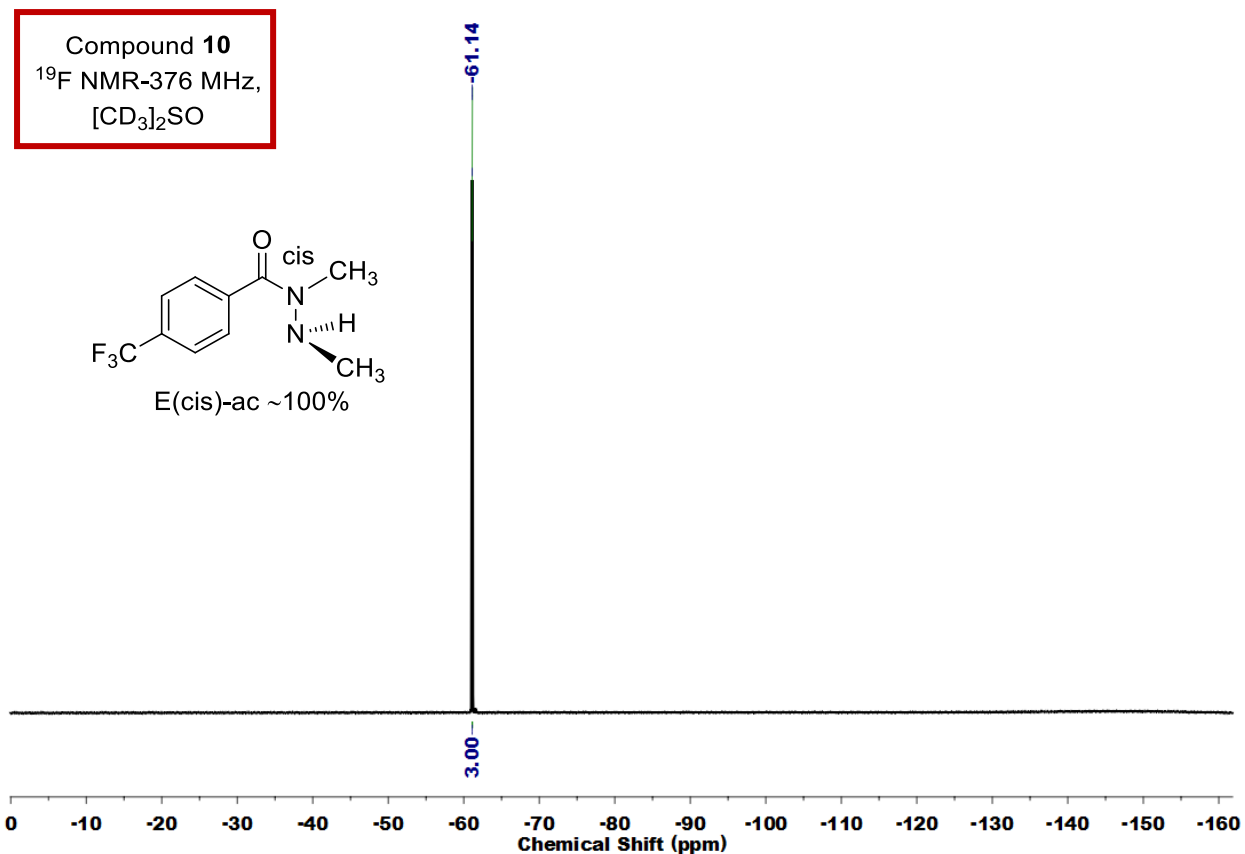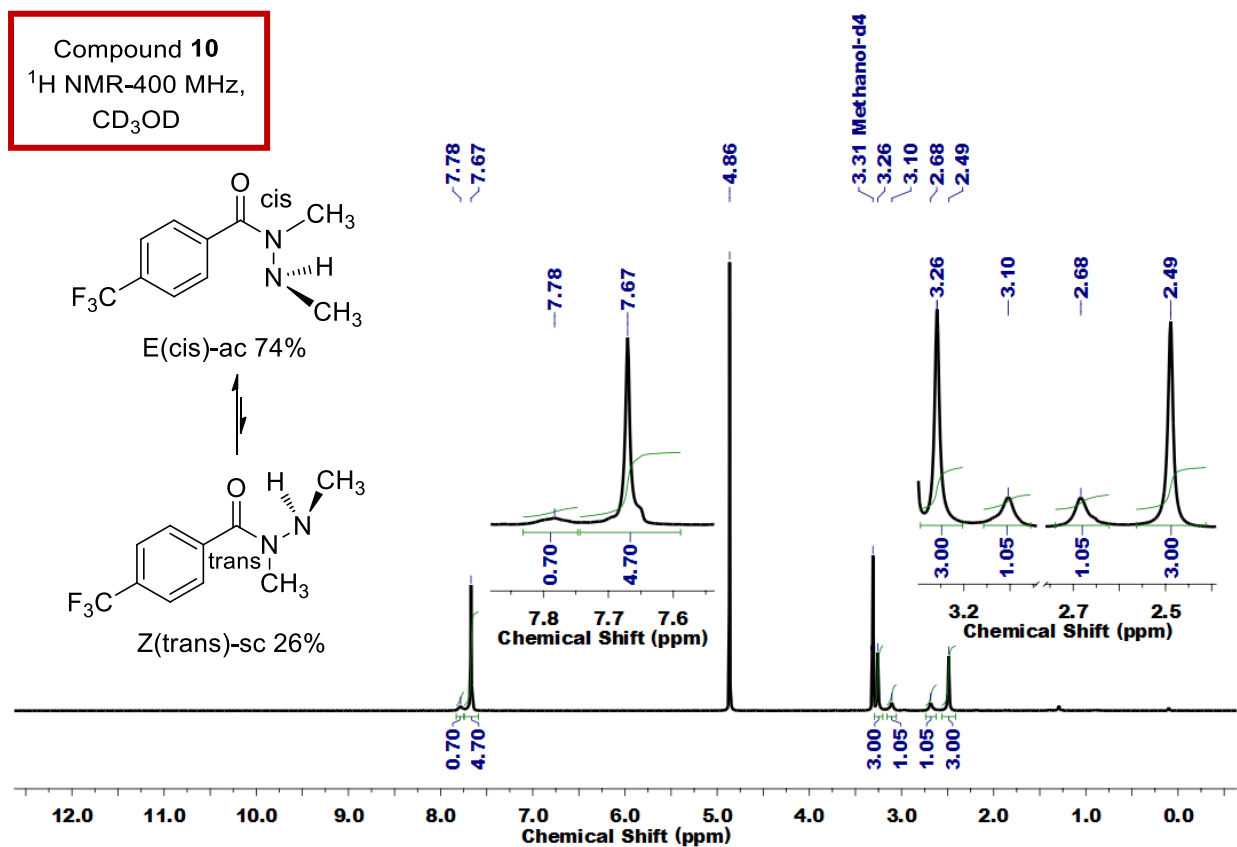

Compound 10  
<sup>19</sup>F NMR-376 MHz,  
 CD<sub>3</sub>OD

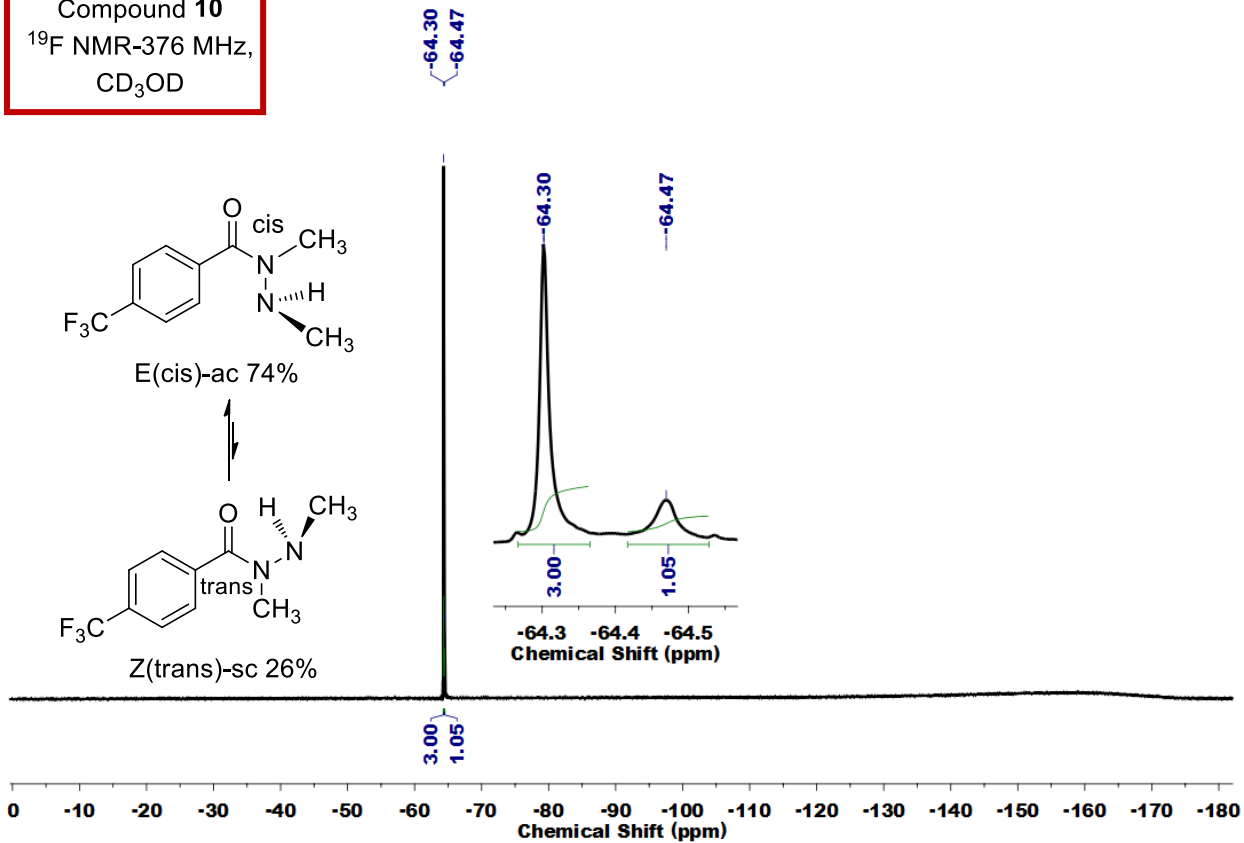

Compound 10  
<sup>1</sup>H NMR-400 MHz,  
 CD<sub>3</sub>CN

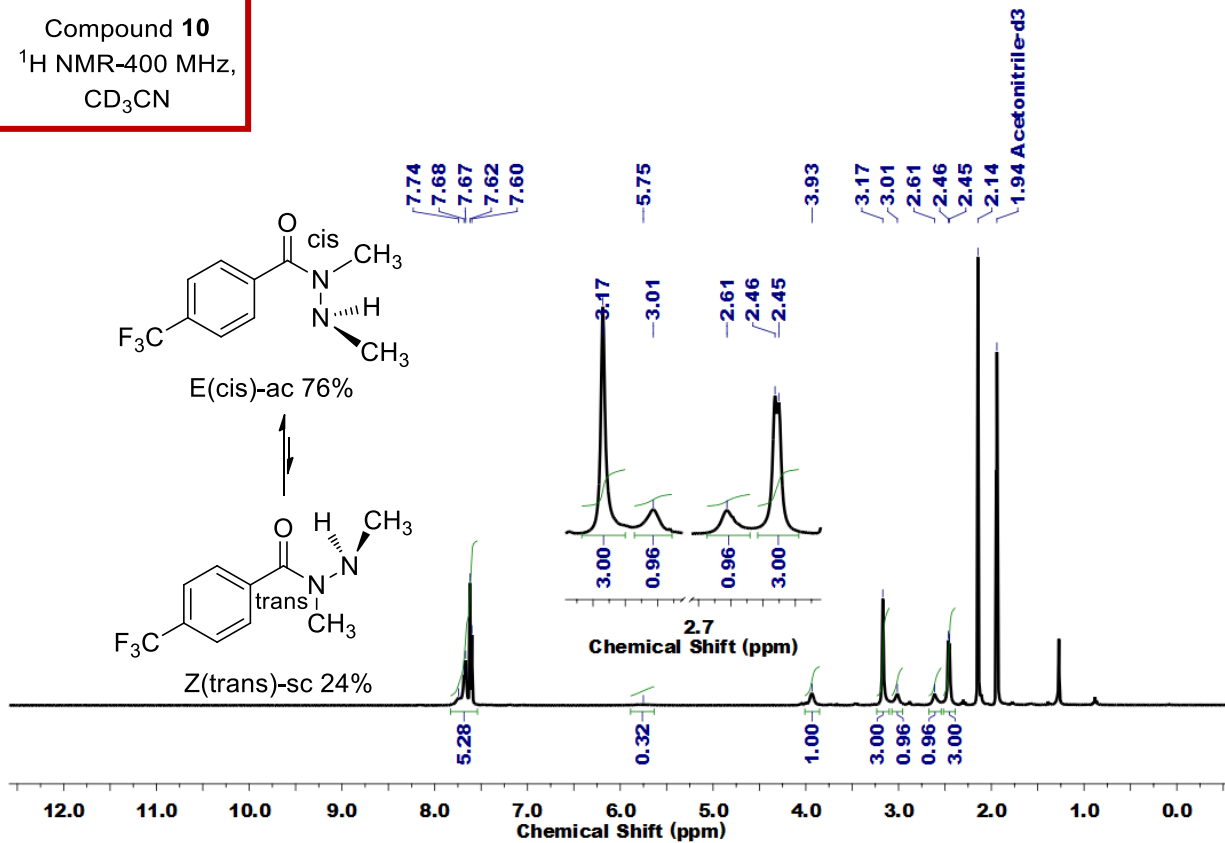

Compound 10  
<sup>19</sup>F NMR-376 MHz,  
 CD<sub>3</sub>CN

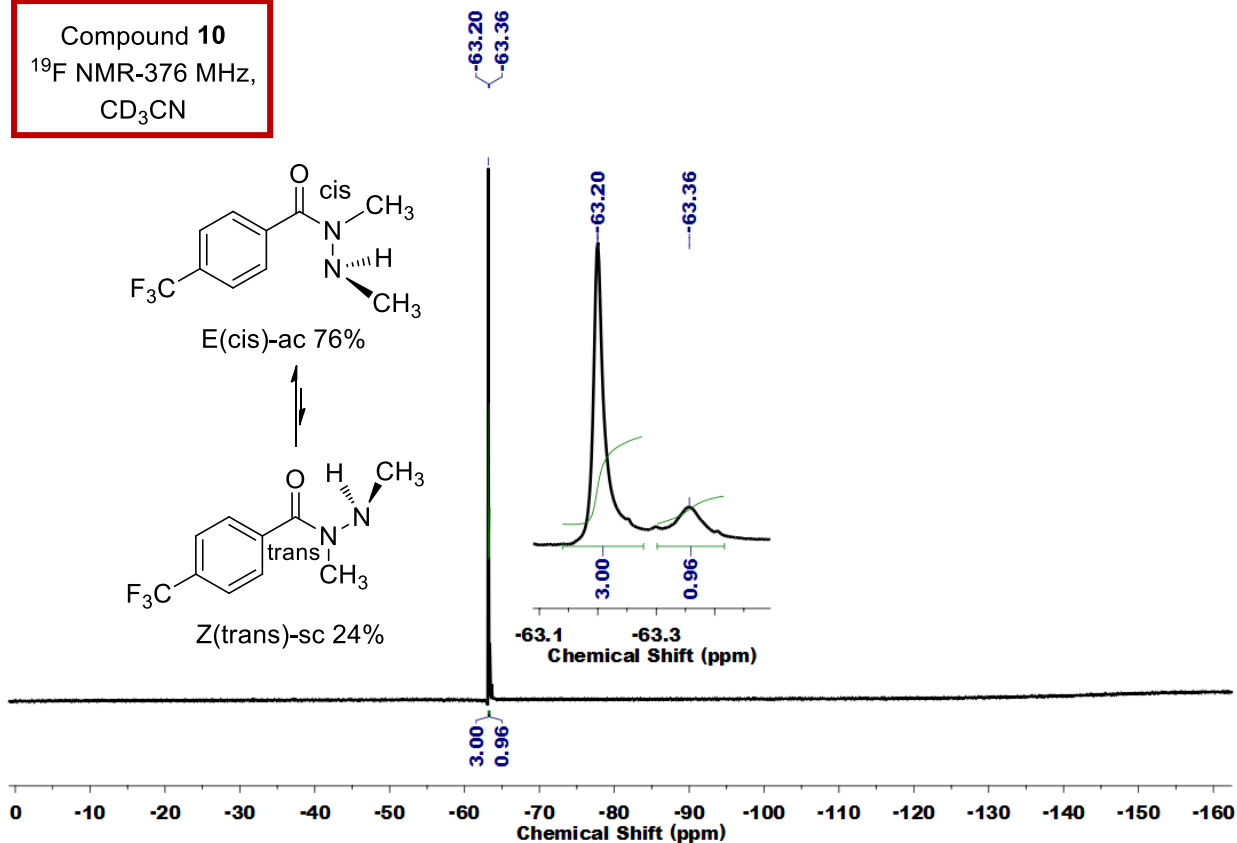

Compound 10  
<sup>1</sup>H NMR-400 MHz,  
 D<sub>2</sub>O

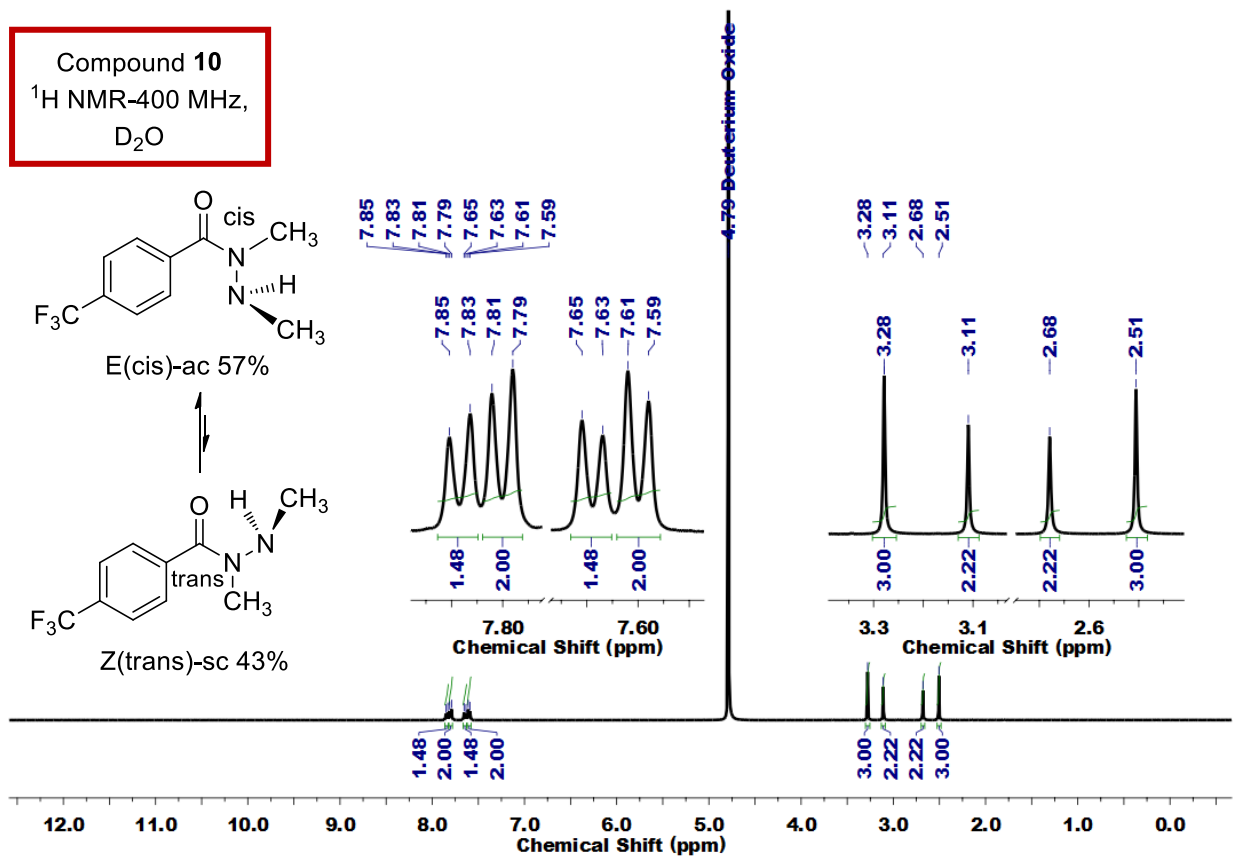

Compound 10  
<sup>19</sup>F NMR-376 MHz,  
 D<sub>2</sub>O

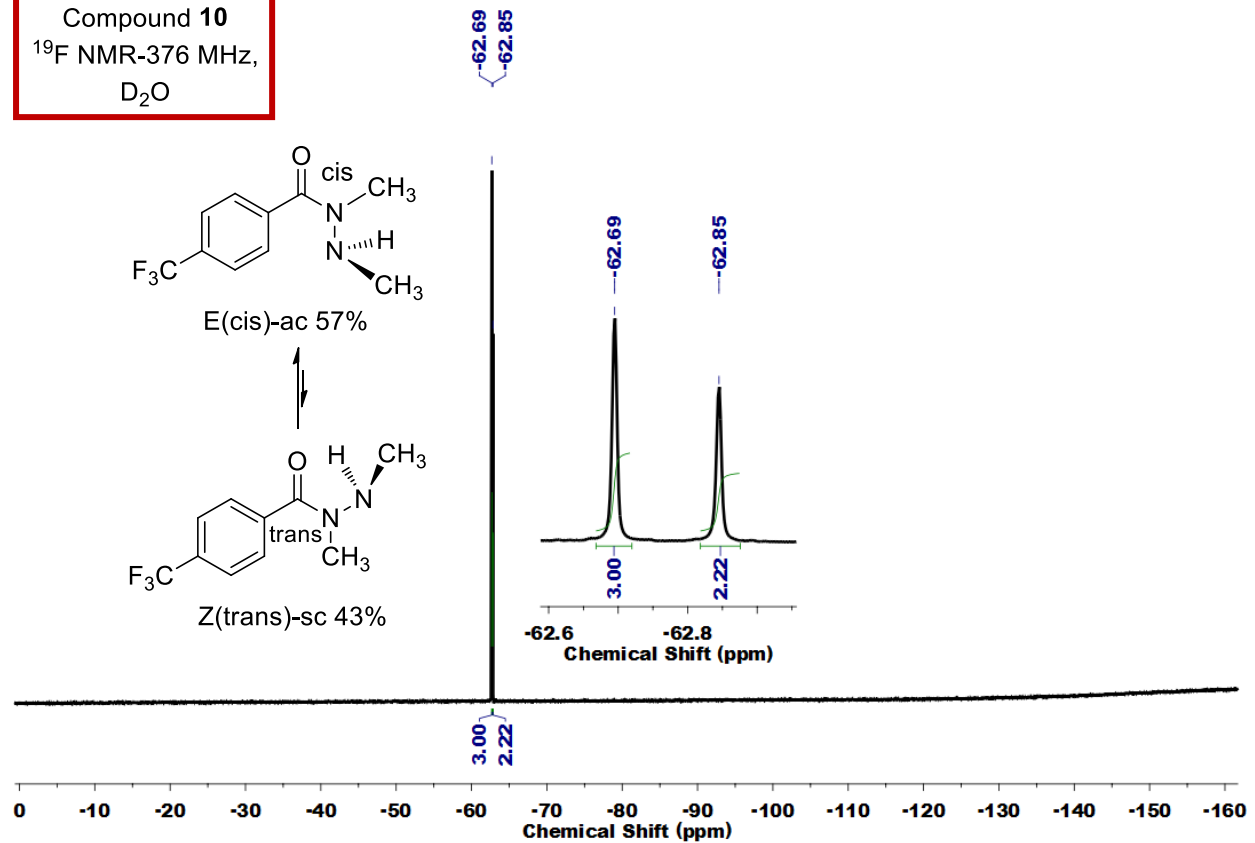

Compound 11  
<sup>1</sup>H NMR-400 MHz,  
 CDCl<sub>3</sub>

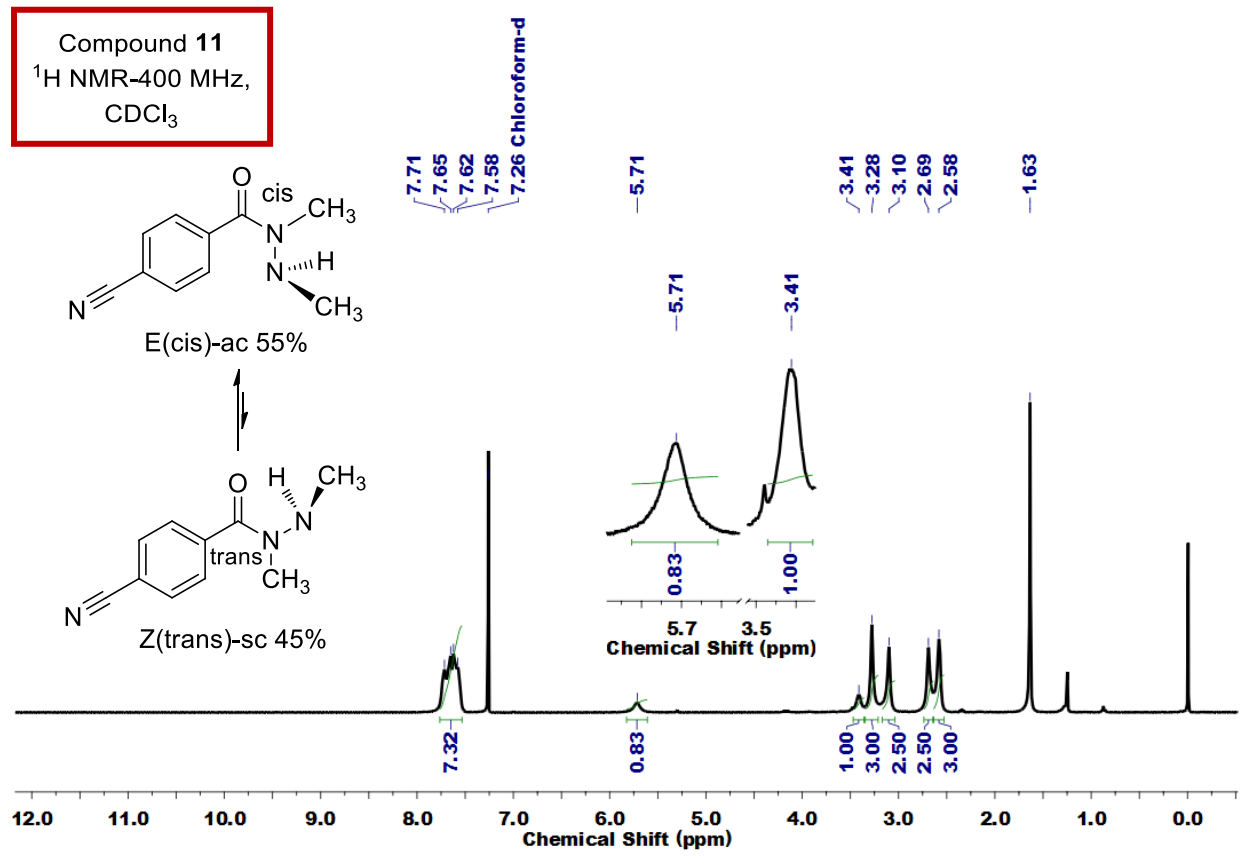

Compound 11  
<sup>13</sup>C NMR-100 MHz,  
 CDCl<sub>3</sub>

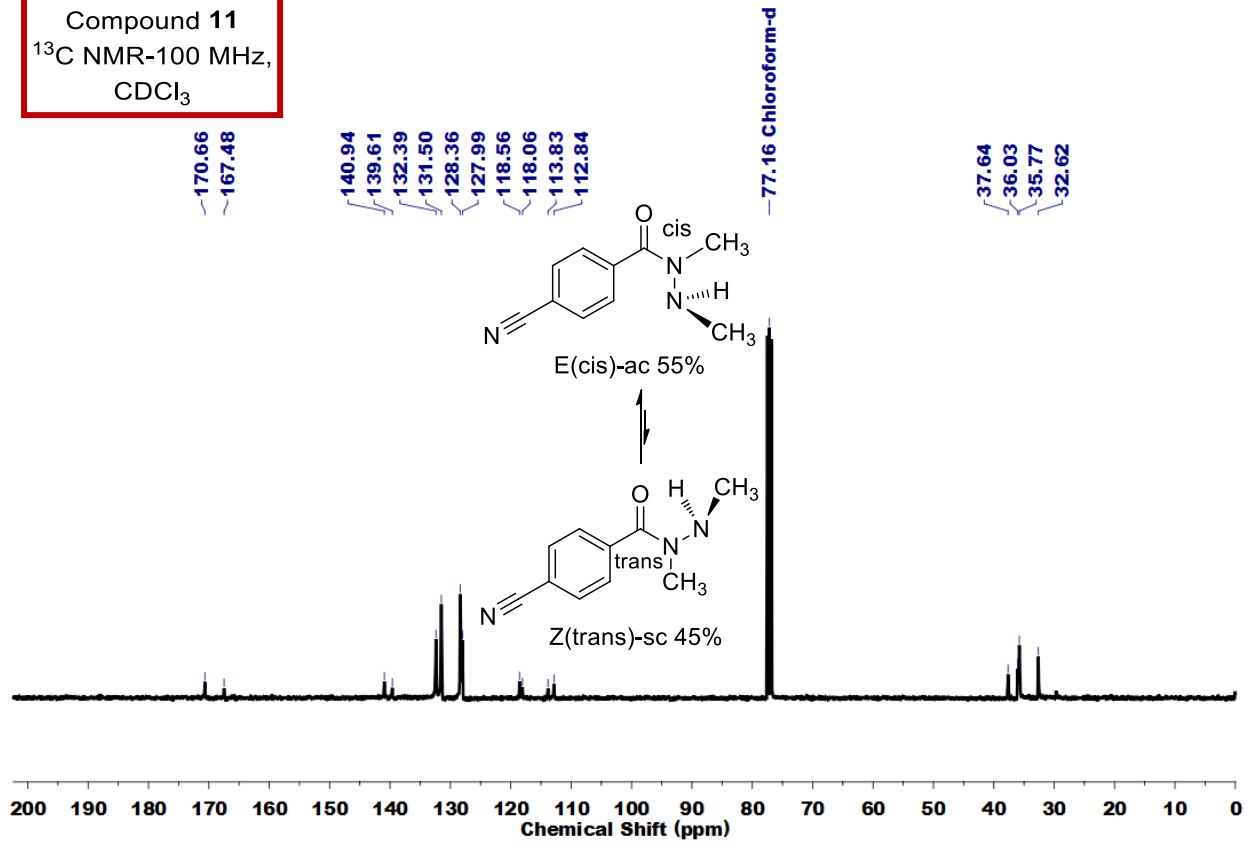

Compound 11  
<sup>1</sup>H NMR-400 MHz,  
 [CD<sub>3</sub>]<sub>2</sub>SO

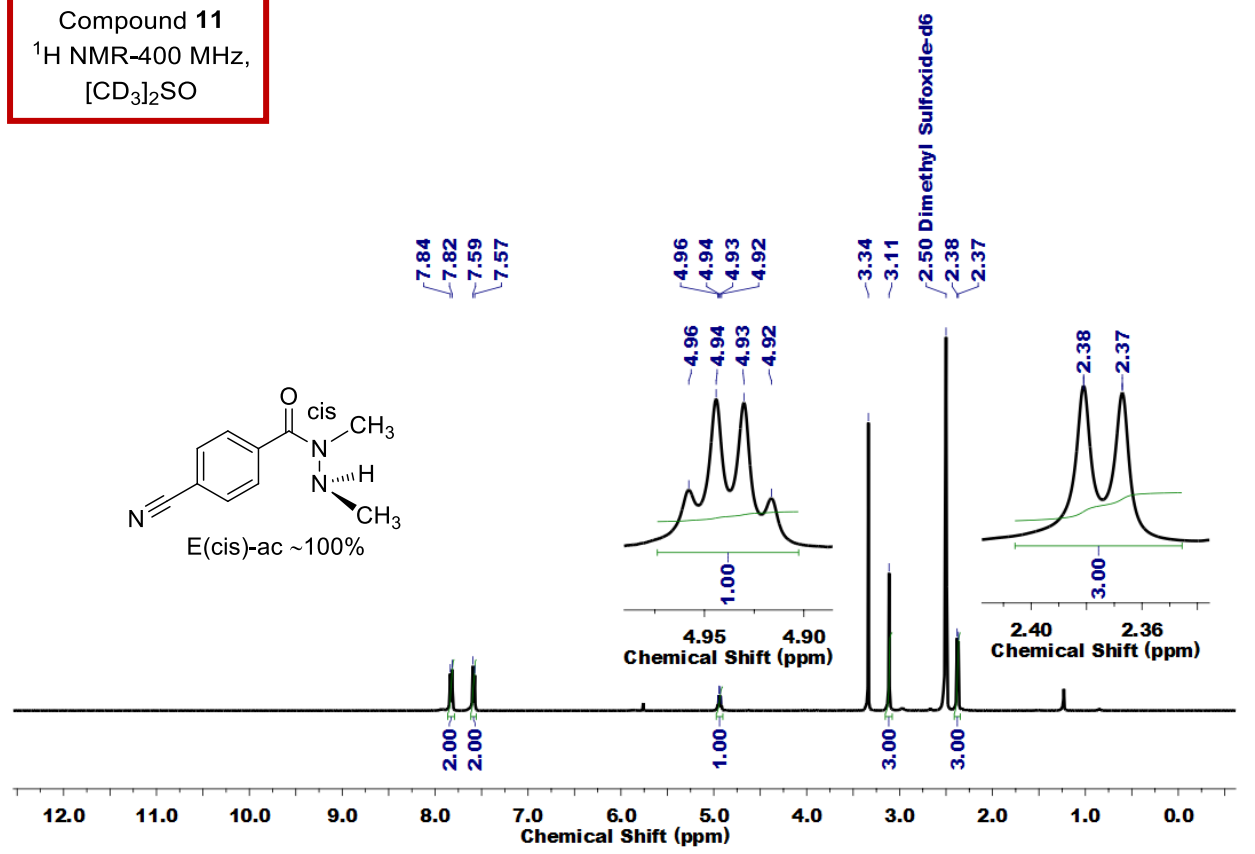

Compound 11  
<sup>1</sup>H NMR-400 MHz,  
 CD<sub>3</sub>OD

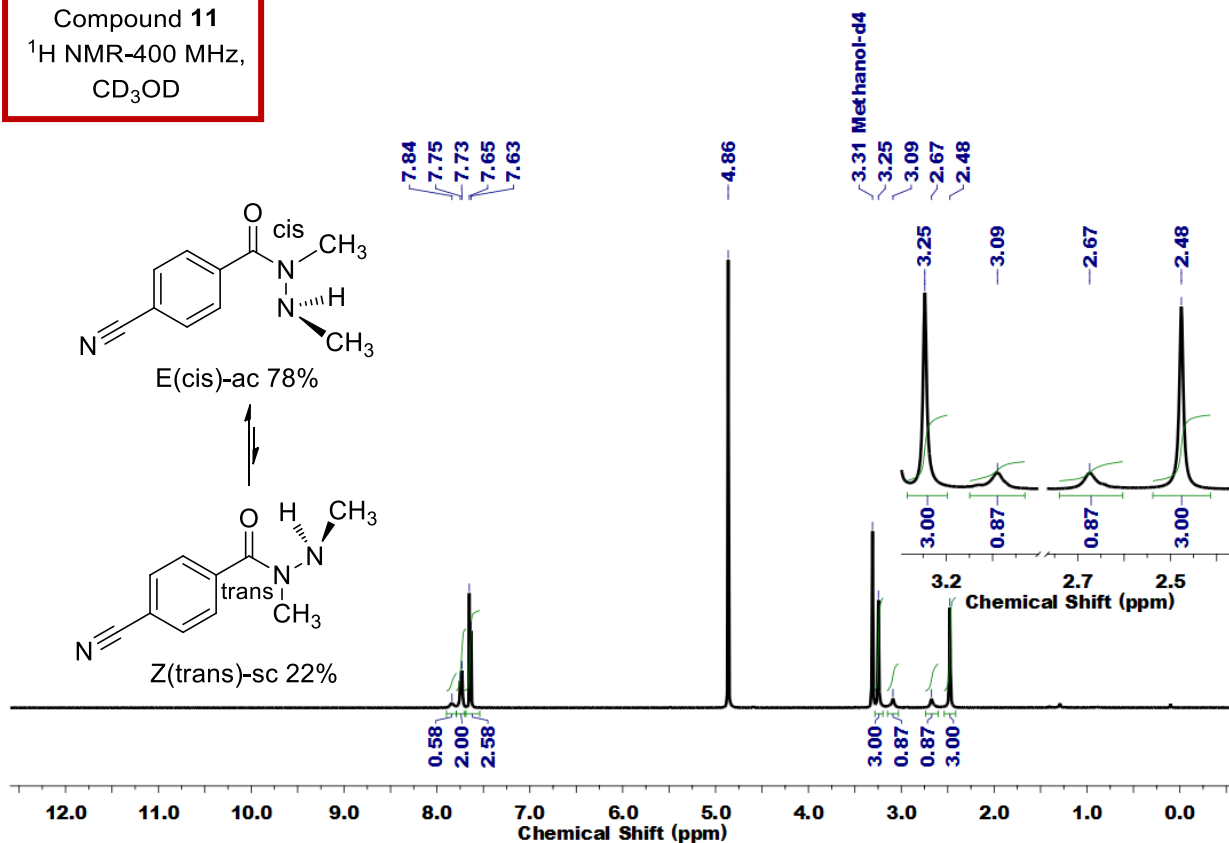

Compound 11  
<sup>1</sup>H NMR-400 MHz,  
 CD<sub>3</sub>CN

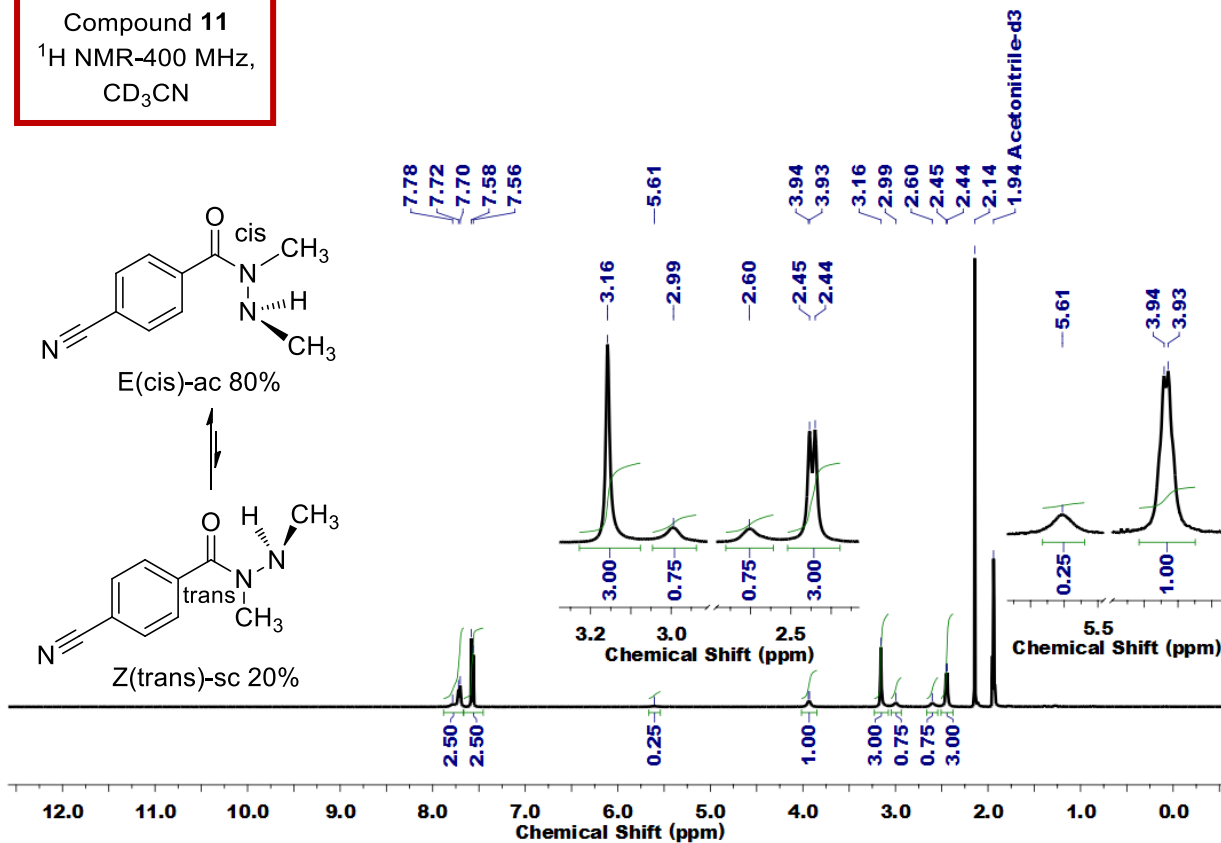



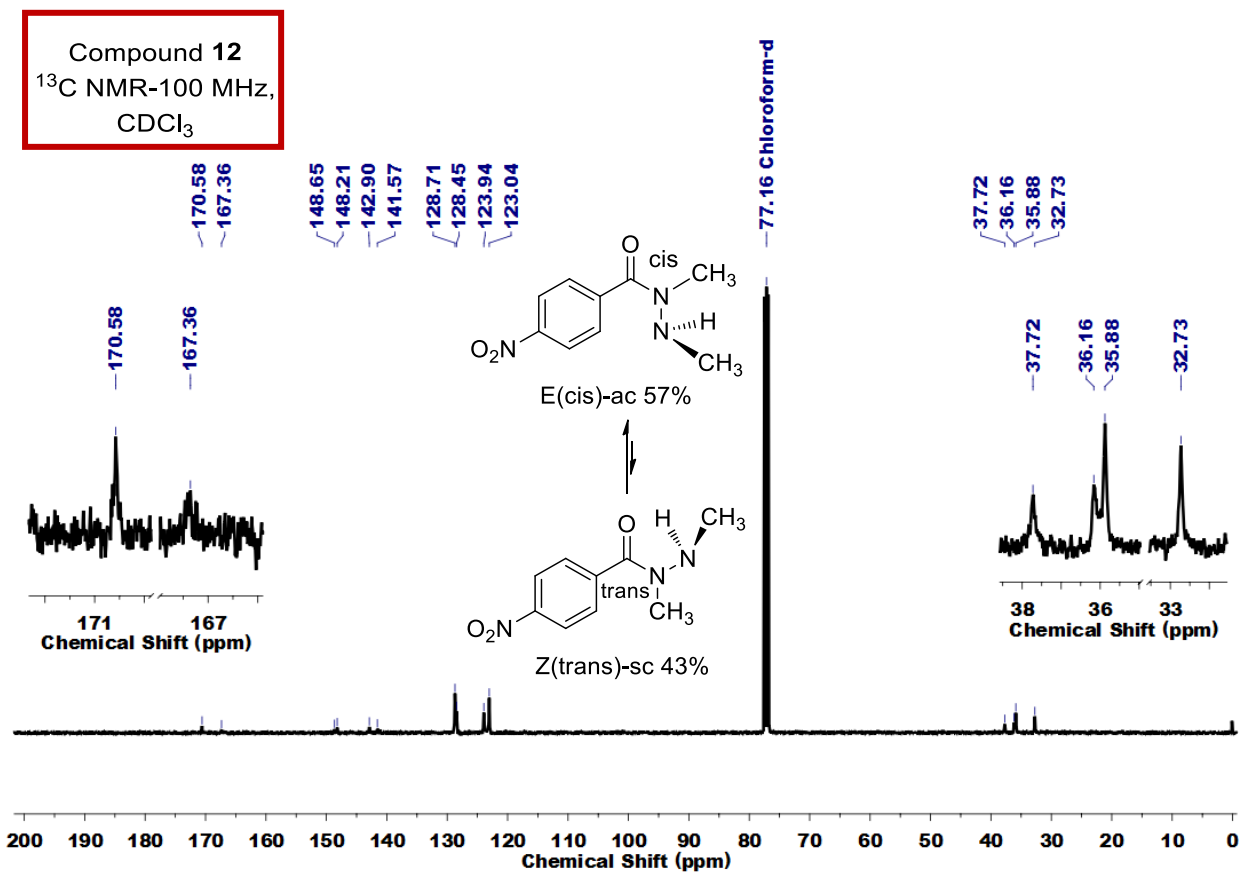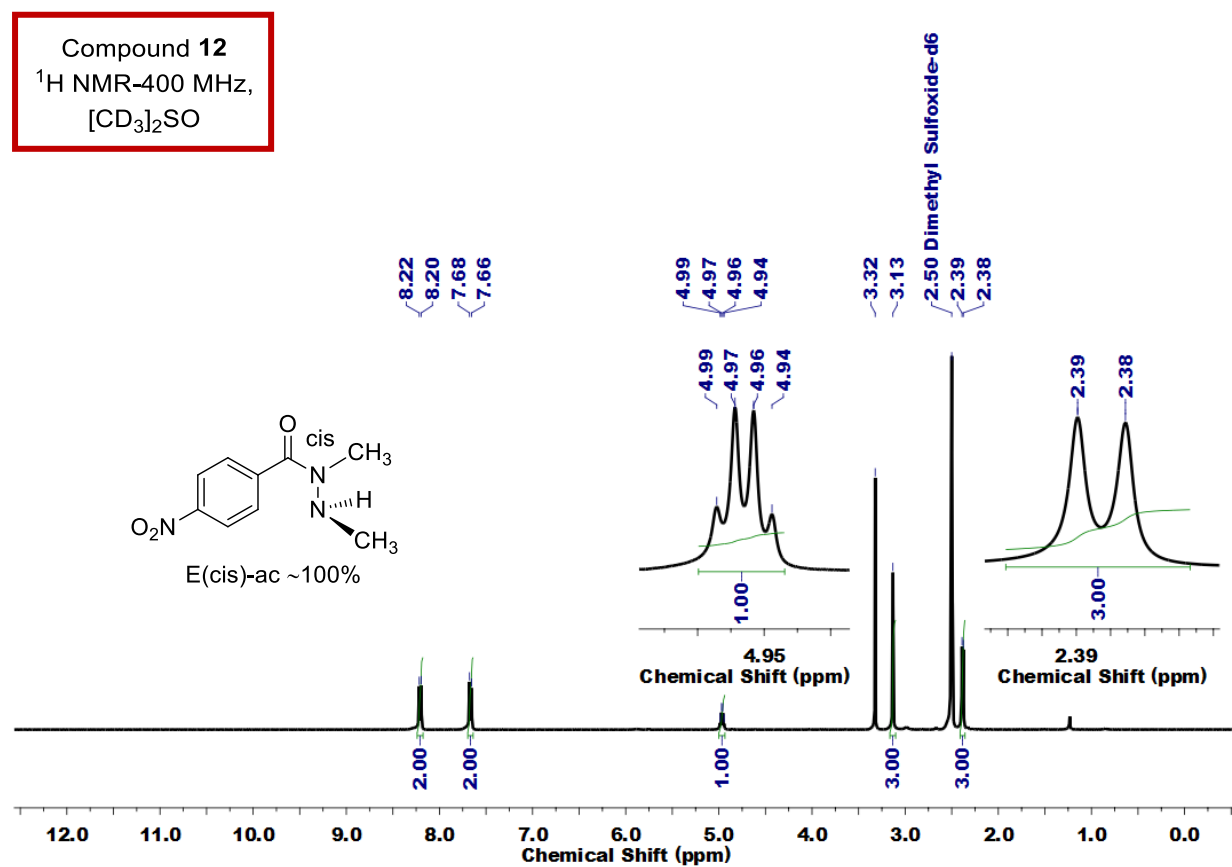



Compound 12  
<sup>1</sup>H NMR-400 MHz,  
 CD<sub>3</sub>OD

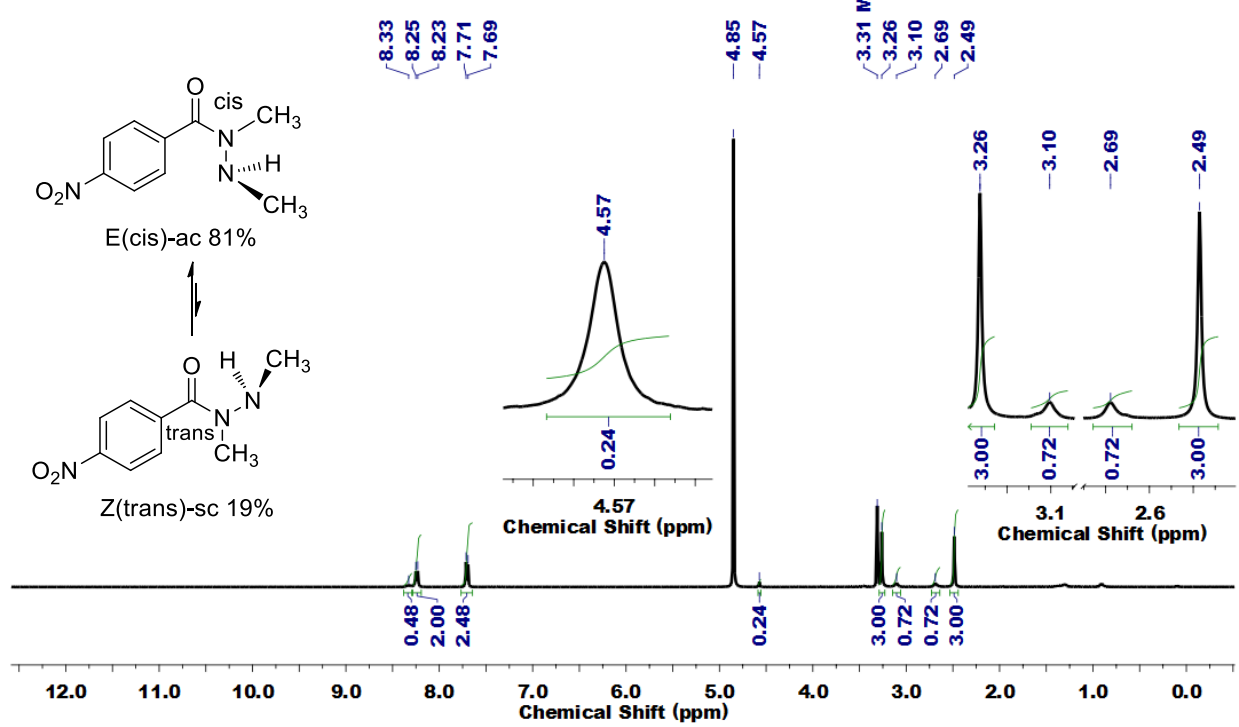

Compound 8  
<sup>1</sup>H NMR-400 MHz,  
 CD<sub>3</sub>CN

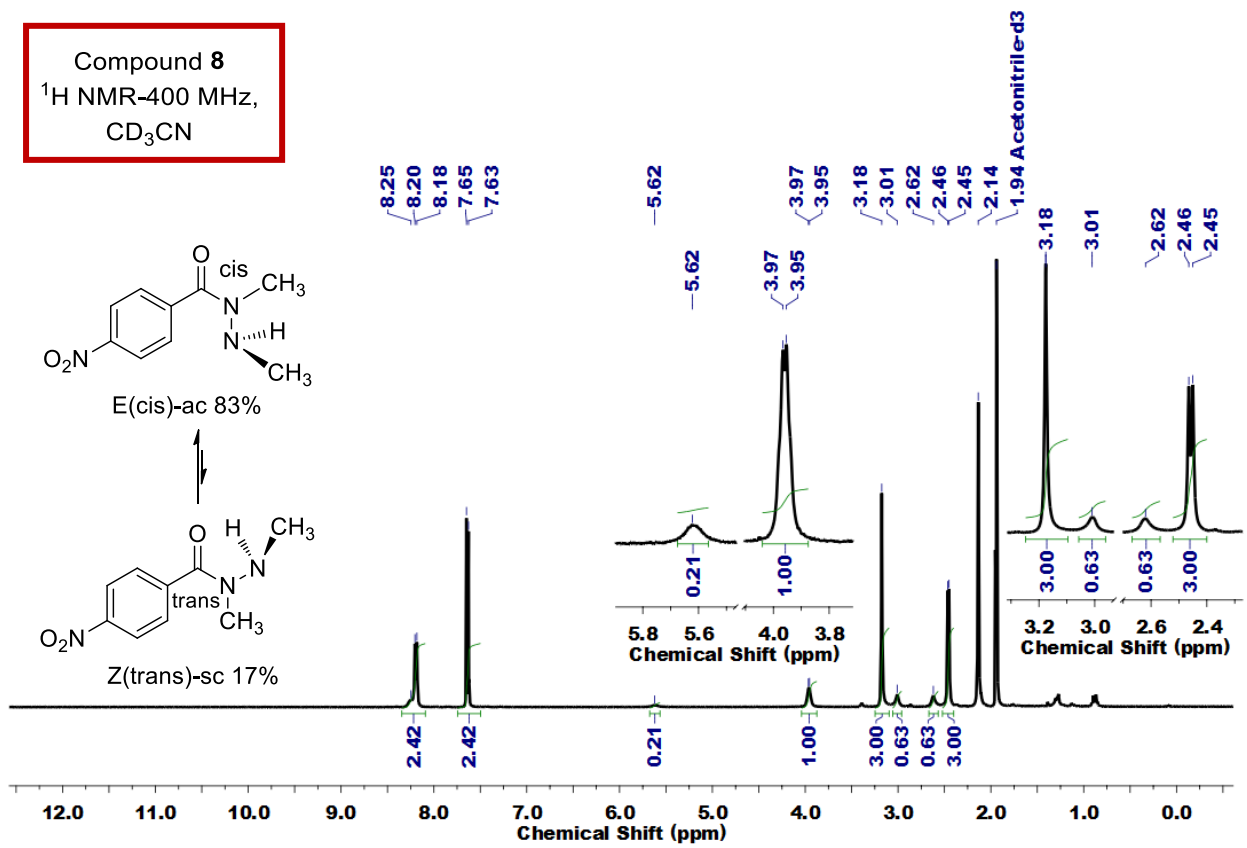

Compound 12  
<sup>1</sup>H NMR-400 MHz,  
D<sub>2</sub>O

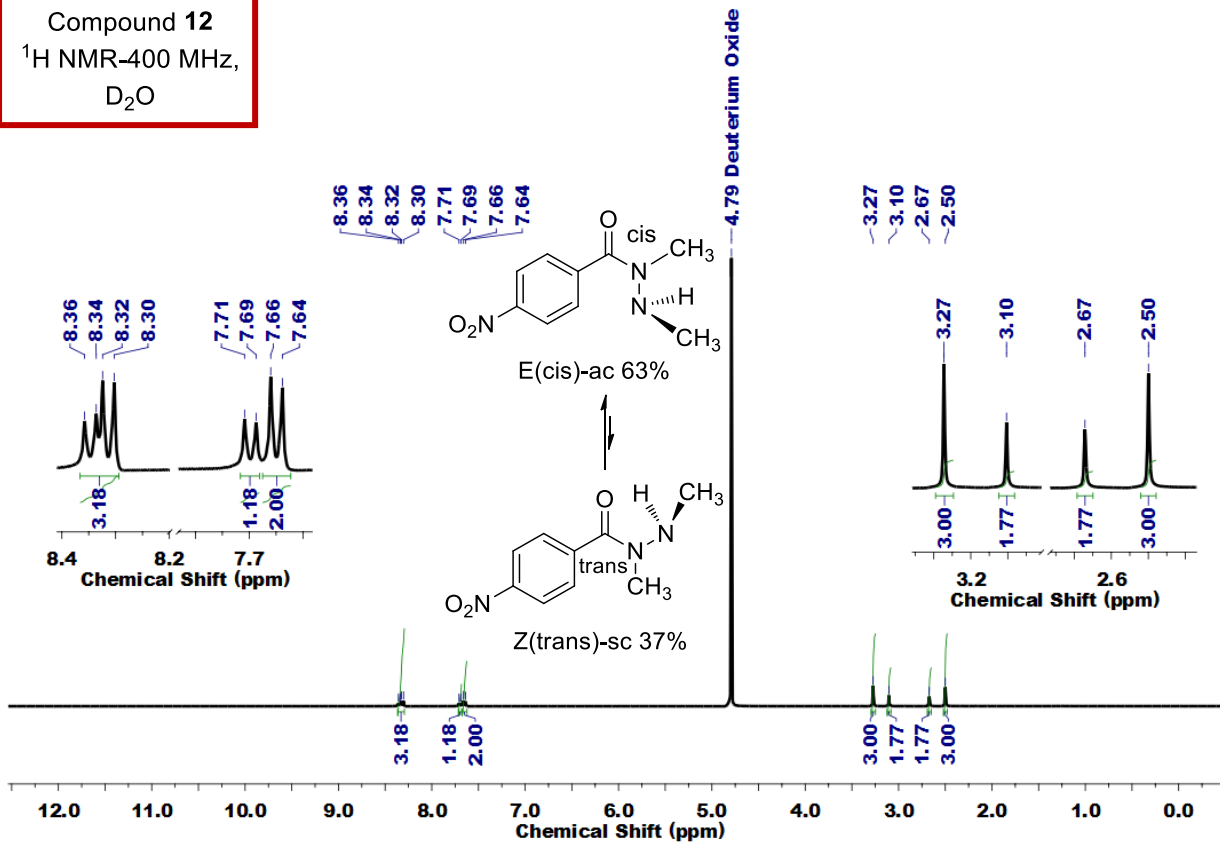

Compound 1  
<sup>1</sup>H NMR-400 MHz,  
CDCl<sub>3</sub>

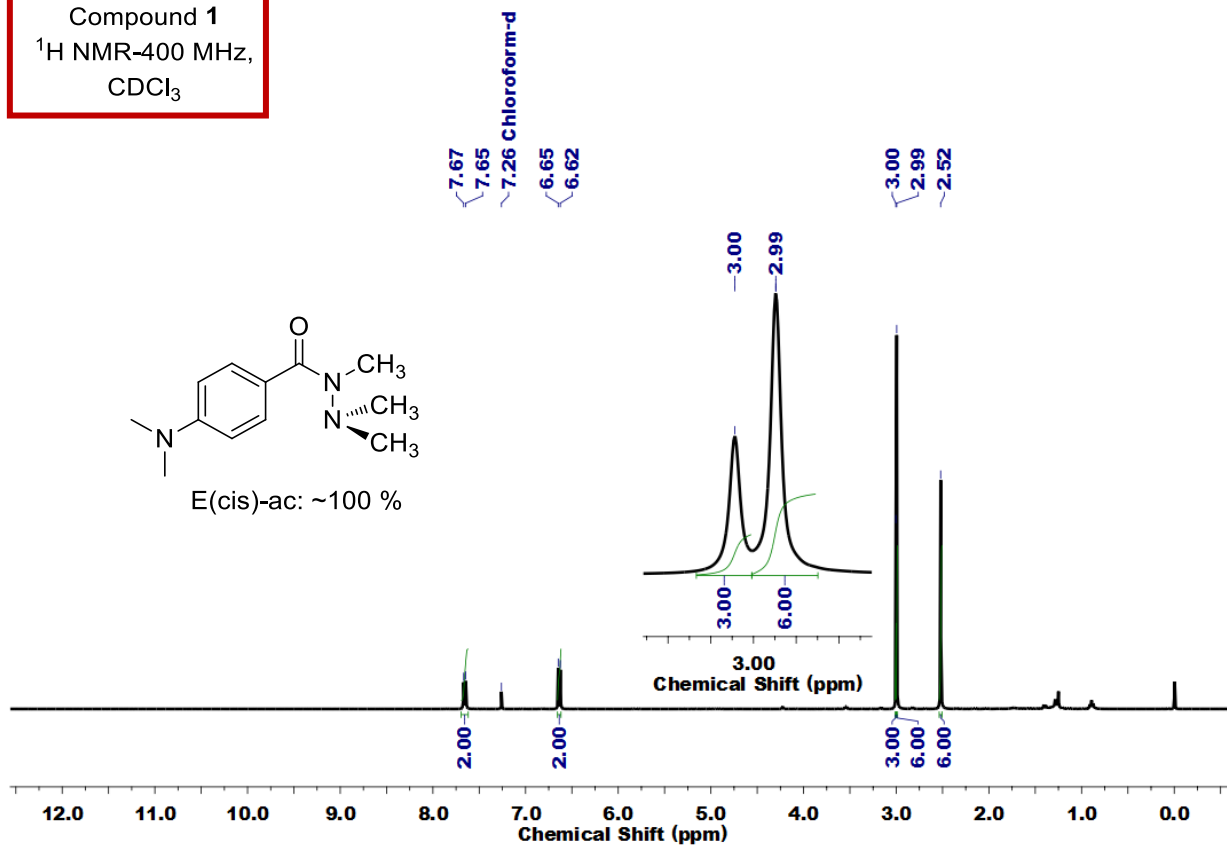

Compound 1  
<sup>13</sup>C NMR-100 MHz,  
CDCl<sub>3</sub>

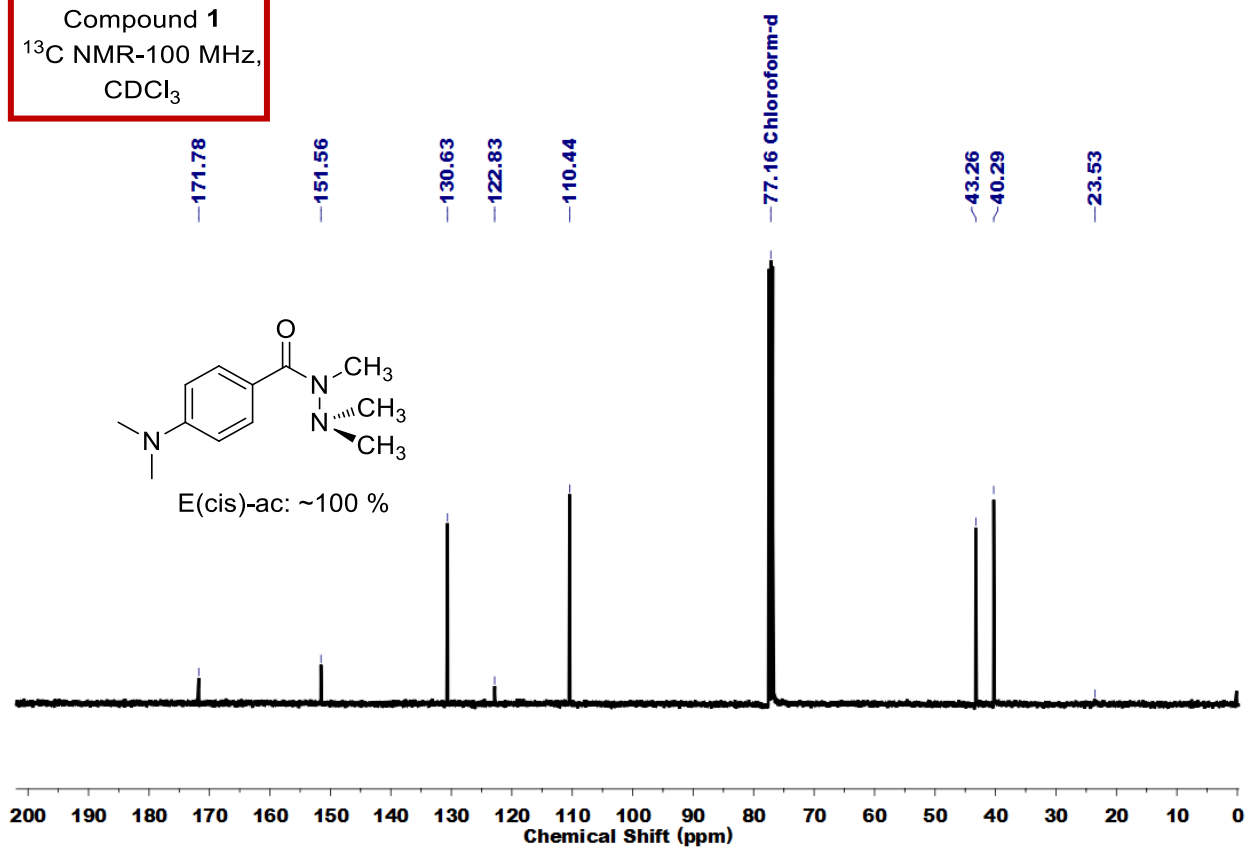

Compound 1  
<sup>1</sup>H NMR-400 MHz,  
[CD<sub>3</sub>]<sub>2</sub>SO

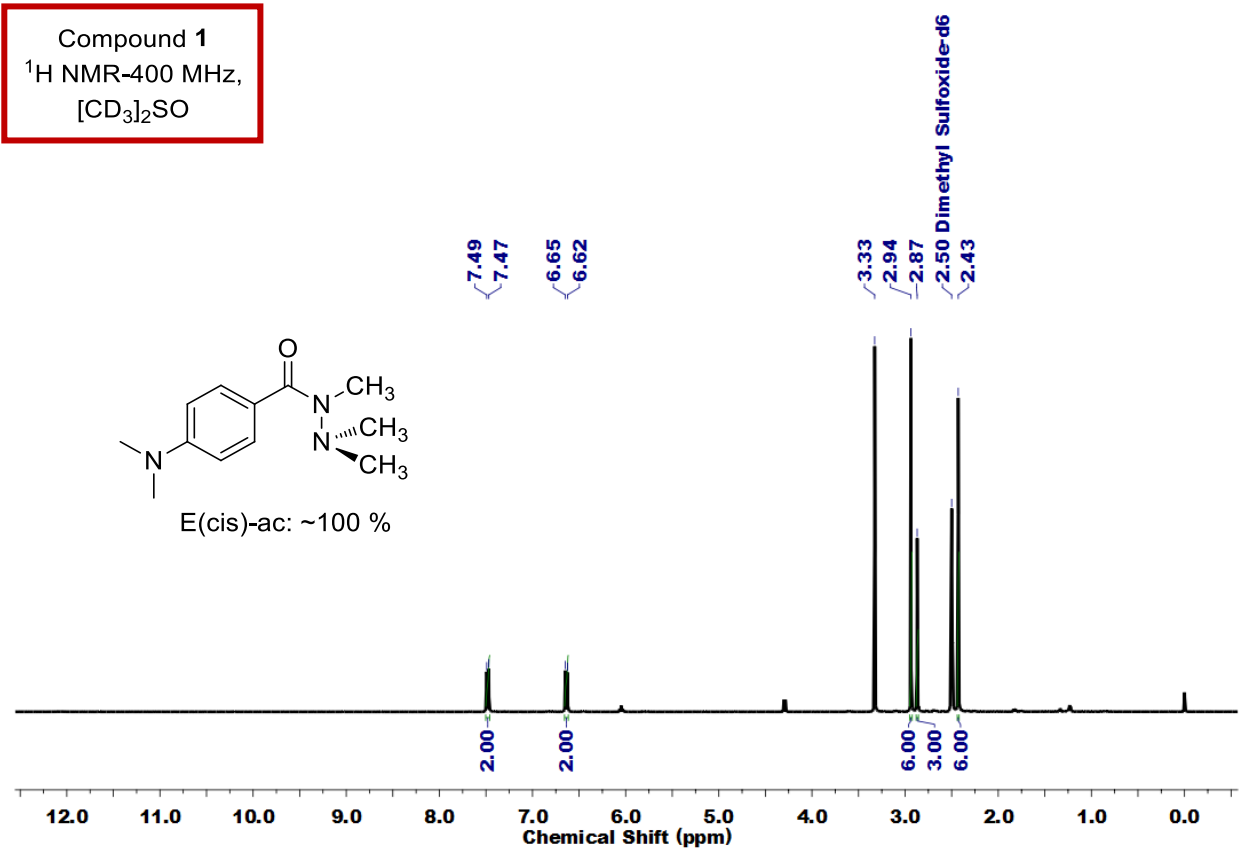

Compound 1  
<sup>1</sup>H NMR-400 MHz,  
CD<sub>3</sub>OD

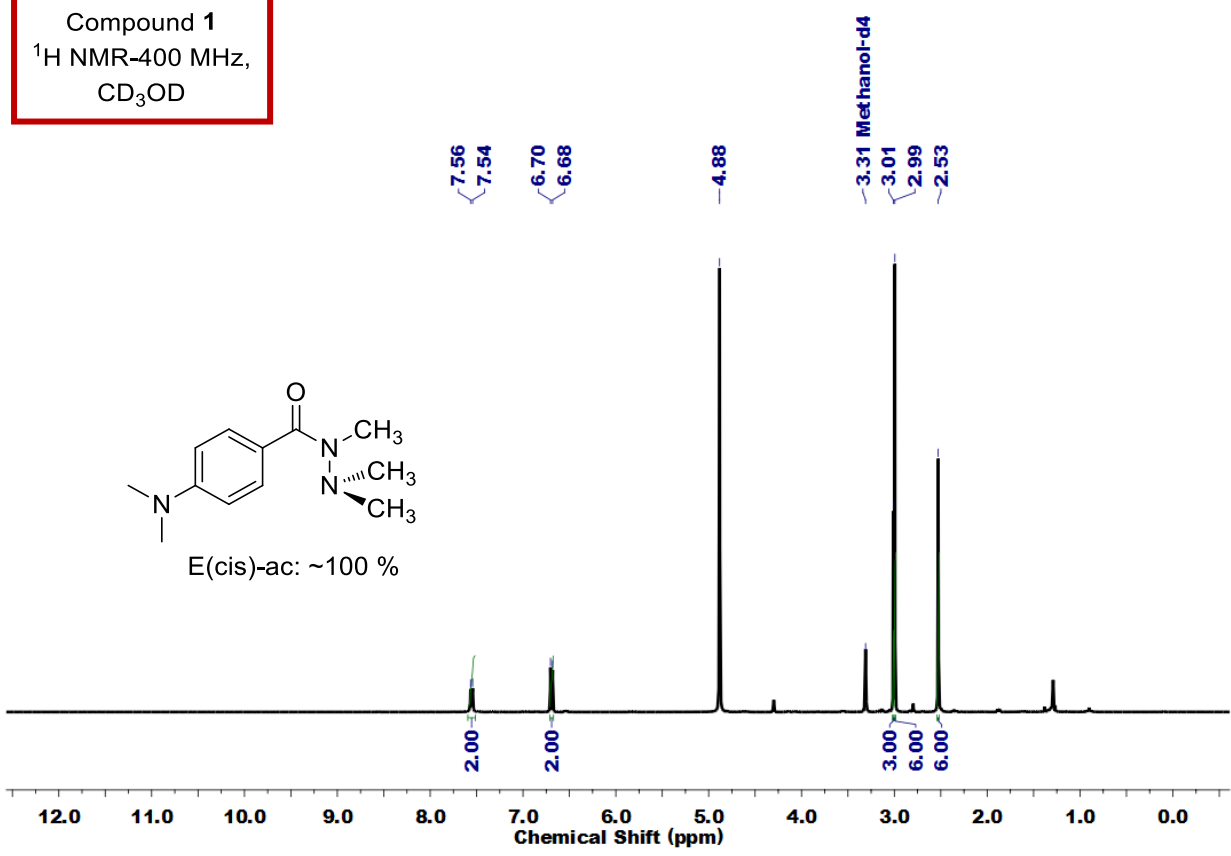

Compound 1  
<sup>1</sup>H NMR-400 MHz,  
CD<sub>3</sub>CN

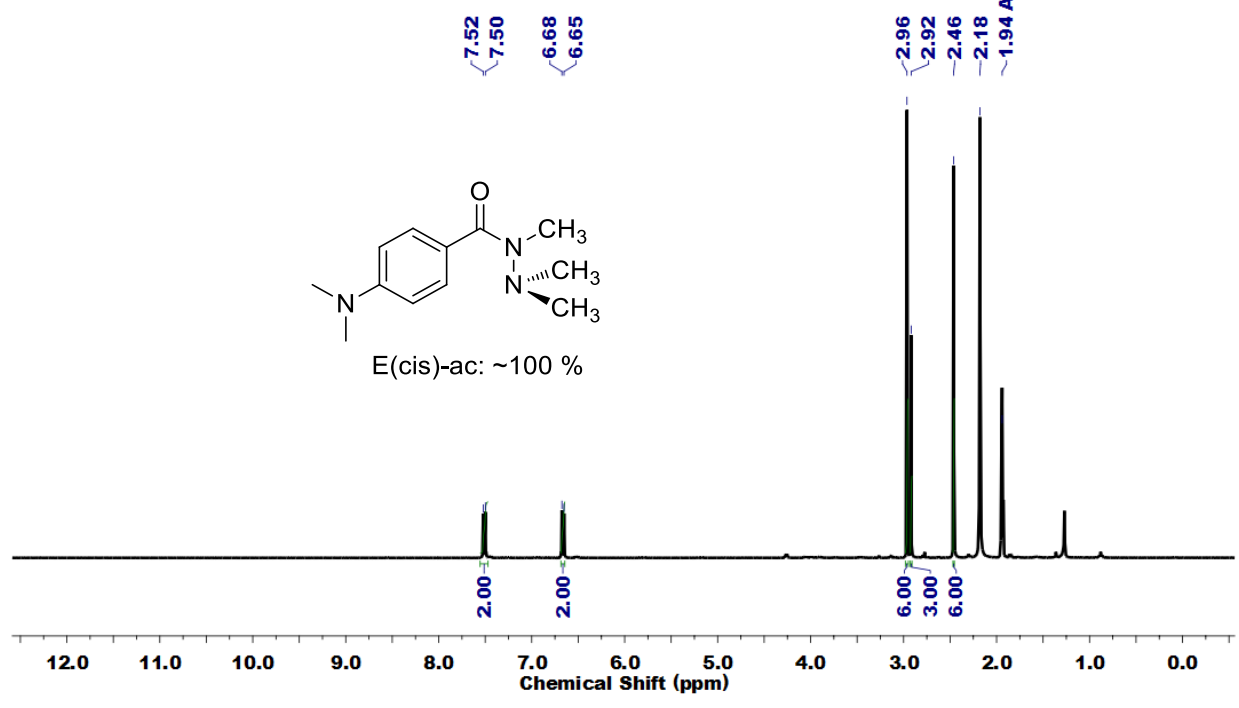

Compound 2  
<sup>1</sup>H NMR-400 MHz,  
CDCl<sub>3</sub>

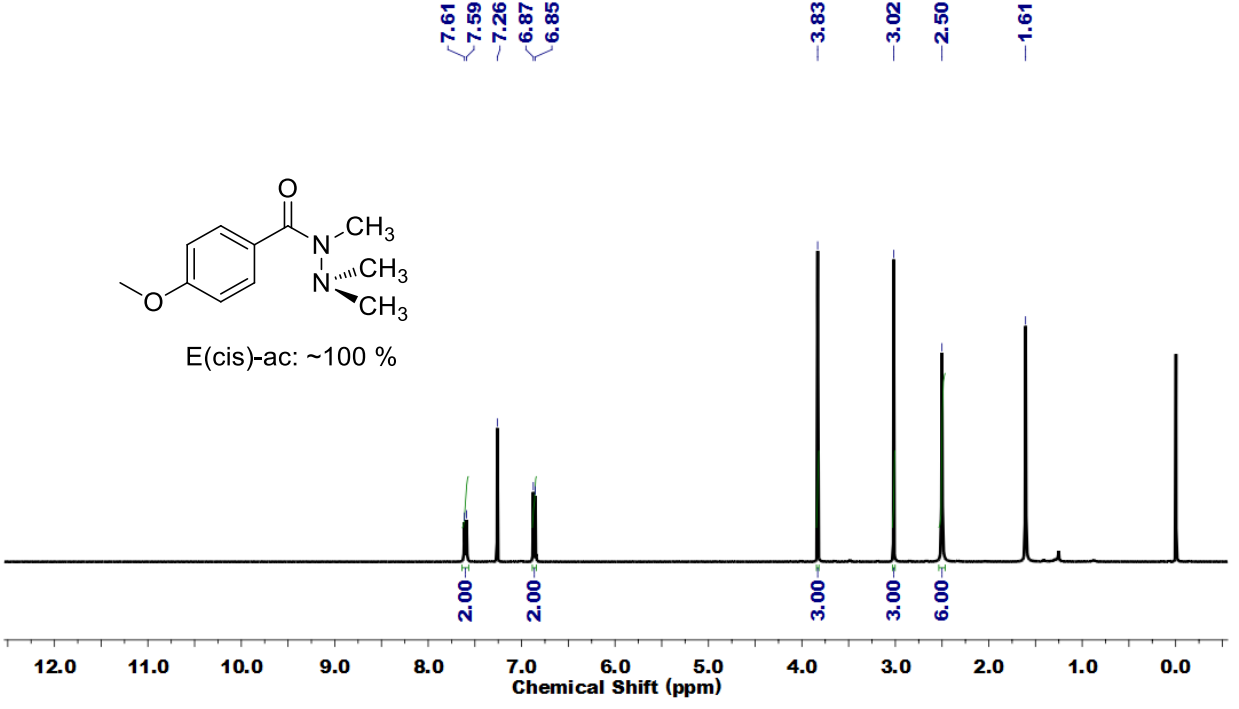

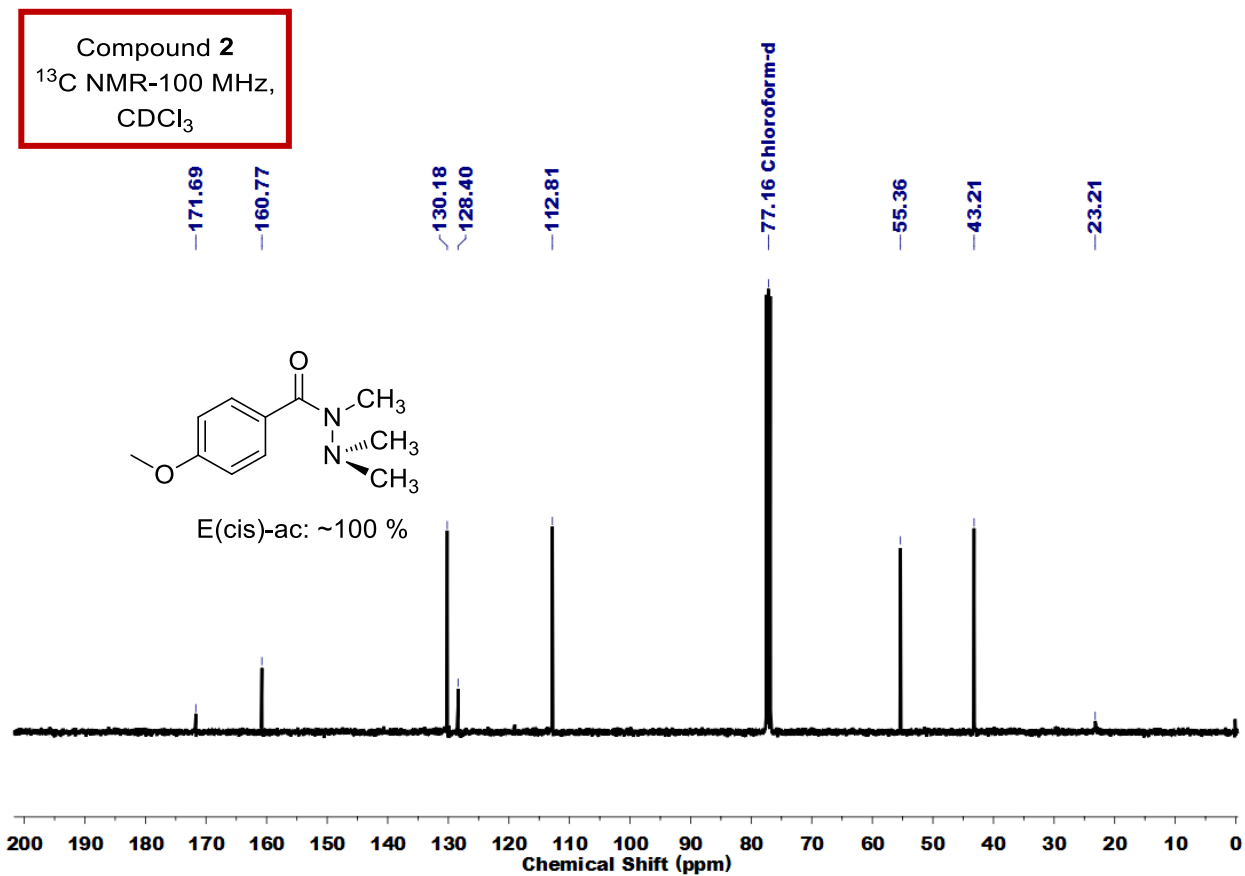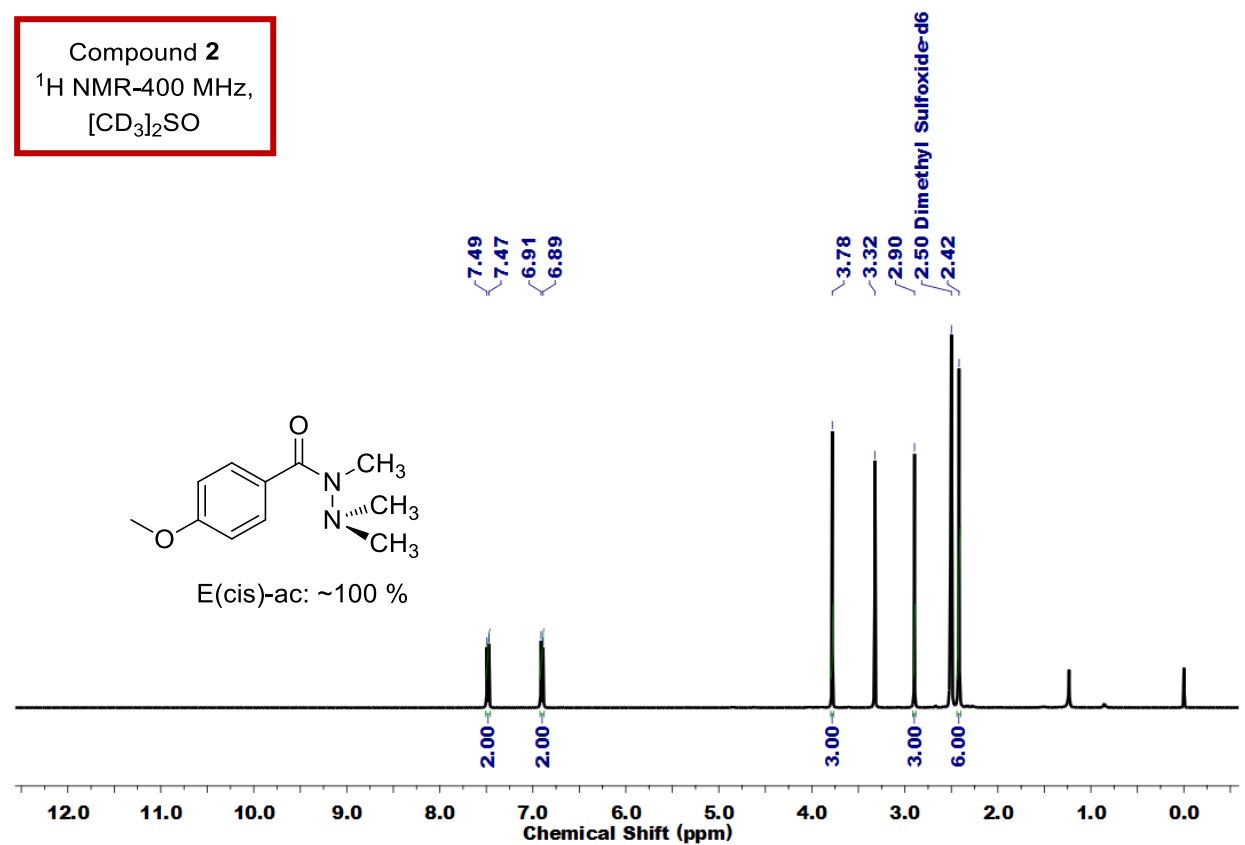

Compound 2  
<sup>1</sup>H NMR-400 MHz,  
CD<sub>3</sub>OD

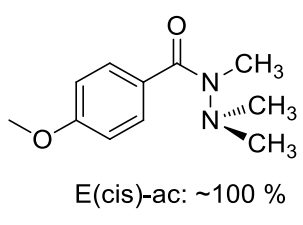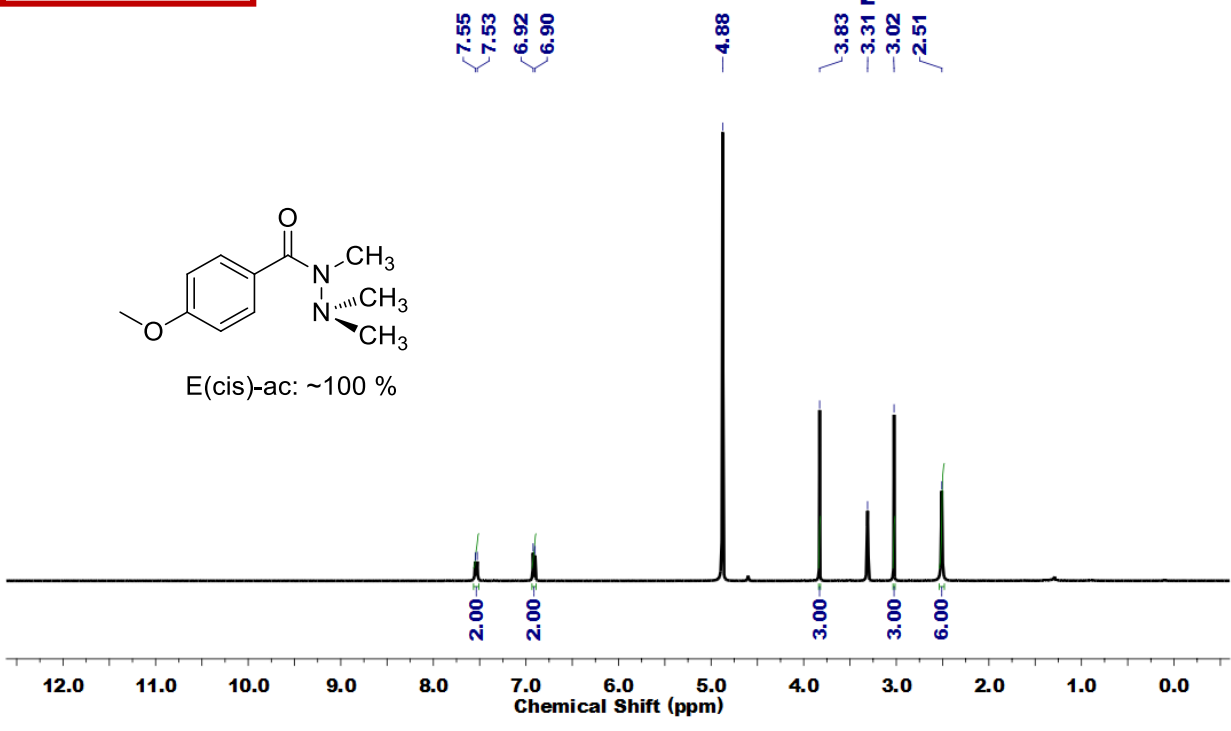

Compound 2  
<sup>1</sup>H NMR-400 MHz,  
CD<sub>3</sub>CN

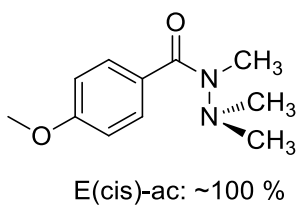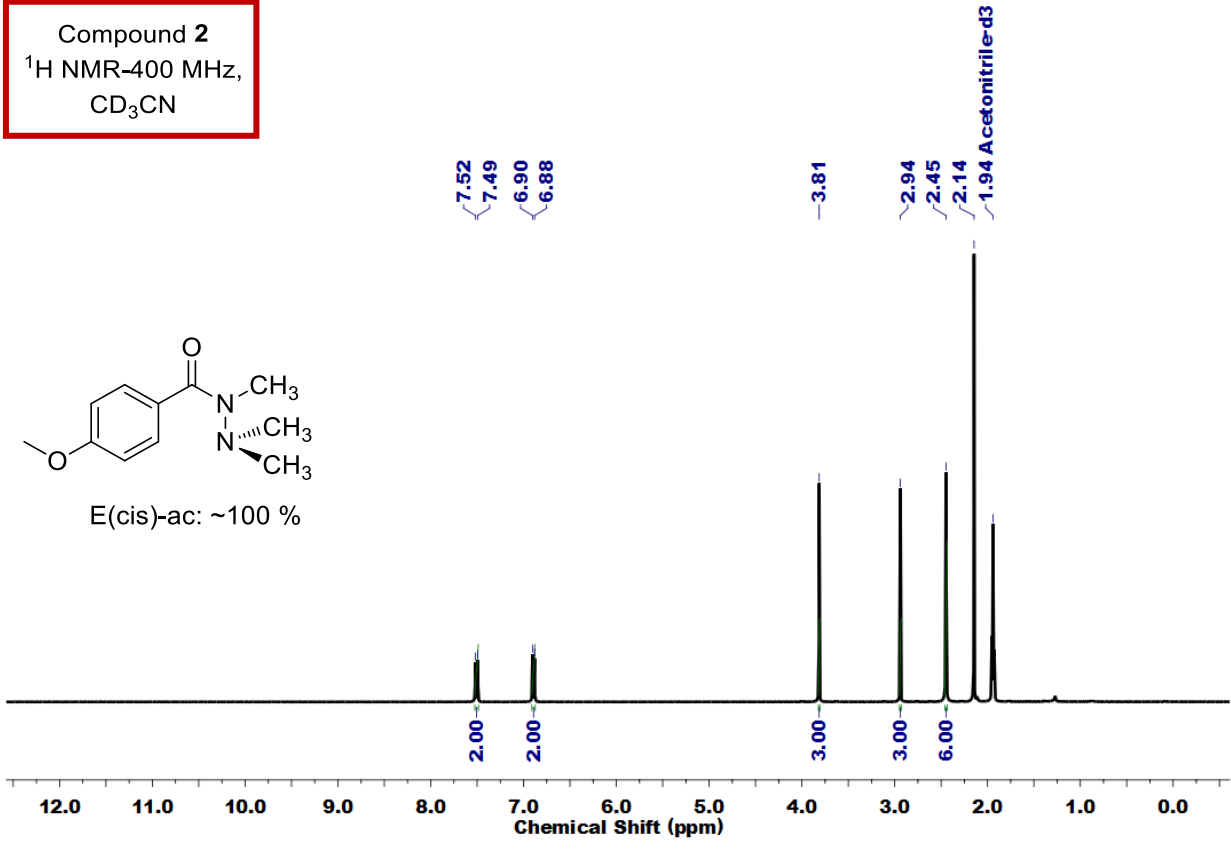

Compound 3  
<sup>1</sup>H NMR-400 MHz,  
CDCl<sub>3</sub>

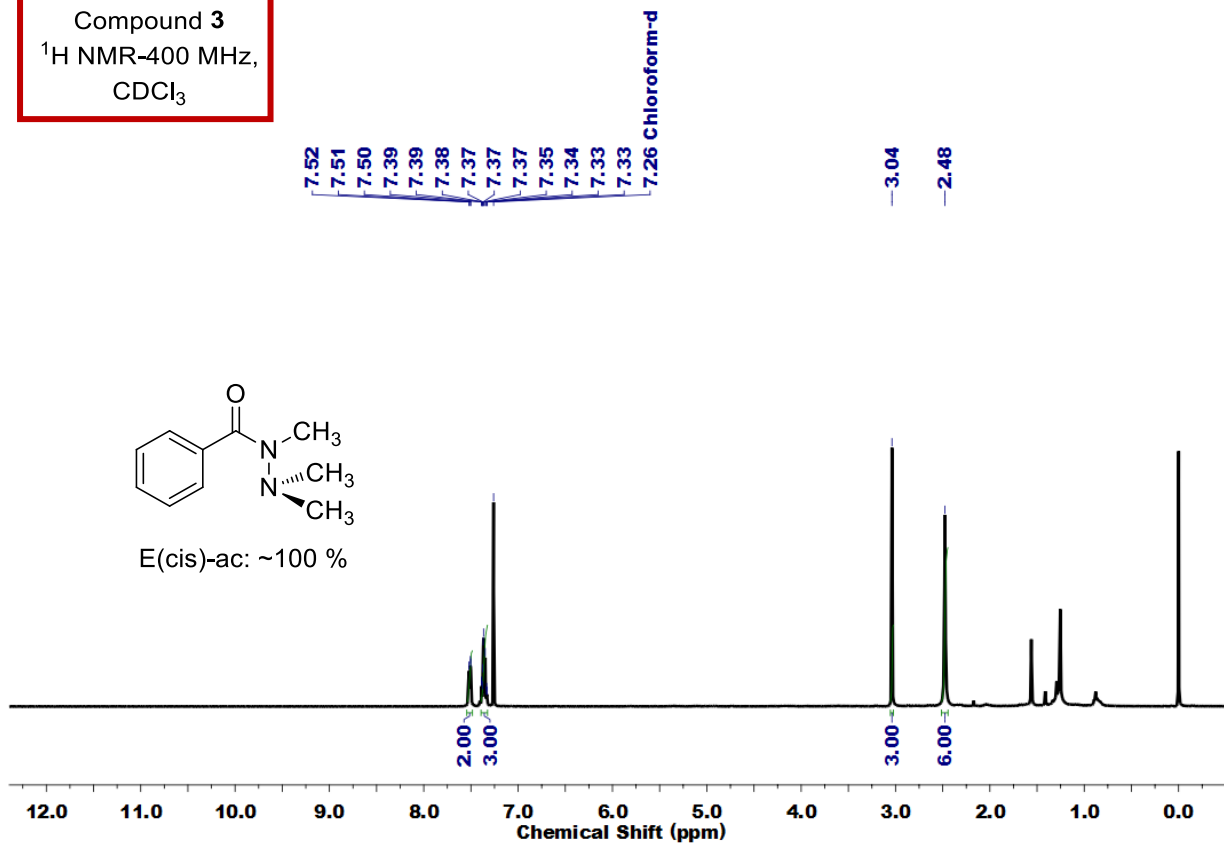

Compound 3  
<sup>13</sup>C NMR-100 MHz,  
CDCl<sub>3</sub>

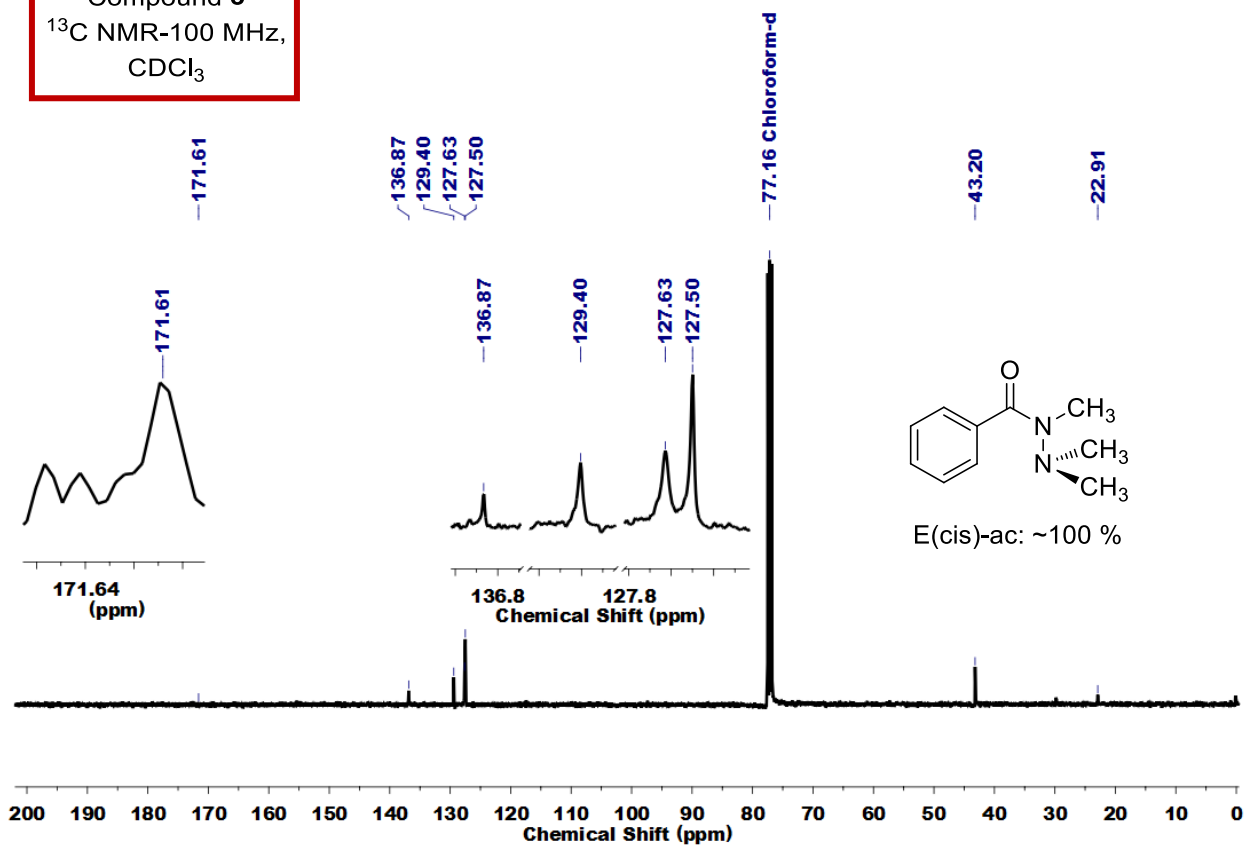



Compound 3  
<sup>1</sup>H NMR-400 MHz,  
 [CD<sub>3</sub>]<sub>2</sub>SO

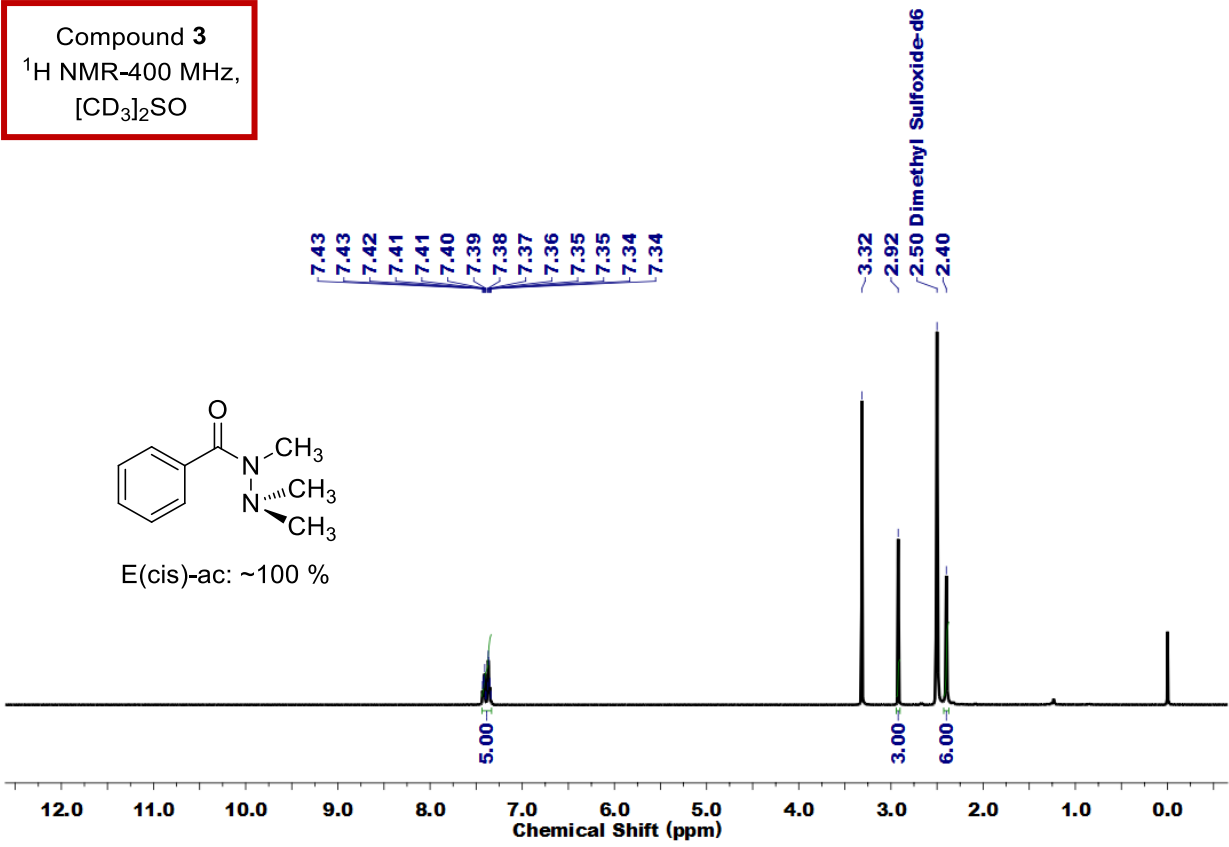

Compound 3  
<sup>1</sup>H NMR-400 MHz,  
 CD<sub>3</sub>OD

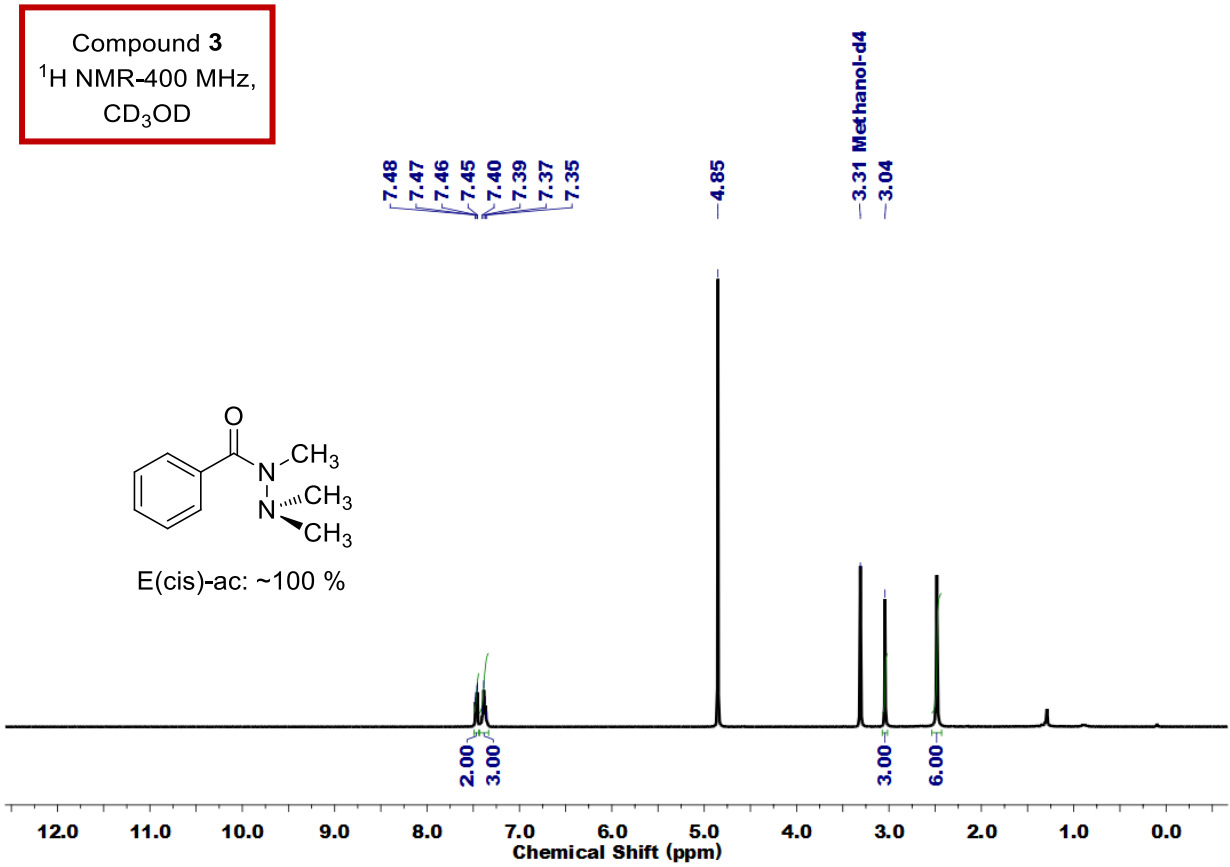

Compound 3  
<sup>1</sup>H NMR-400 MHz,  
CD<sub>3</sub>CN

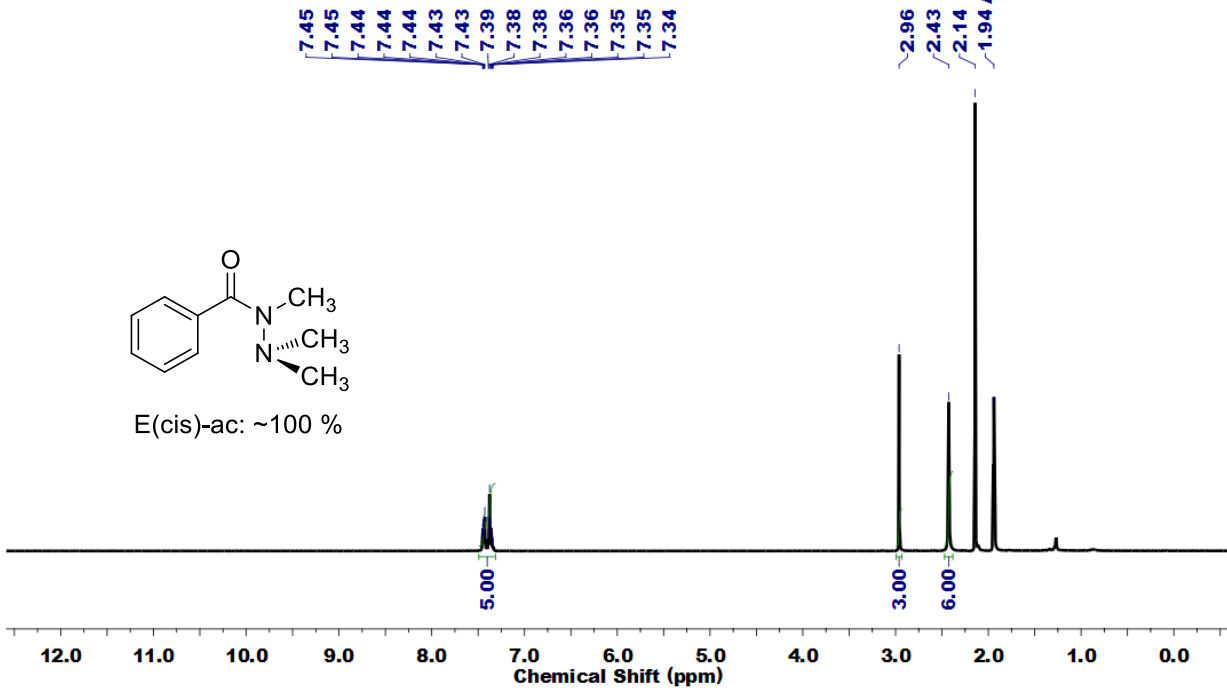

Compound 4  
<sup>1</sup>H NMR-400 MHz,  
CDCl<sub>3</sub>

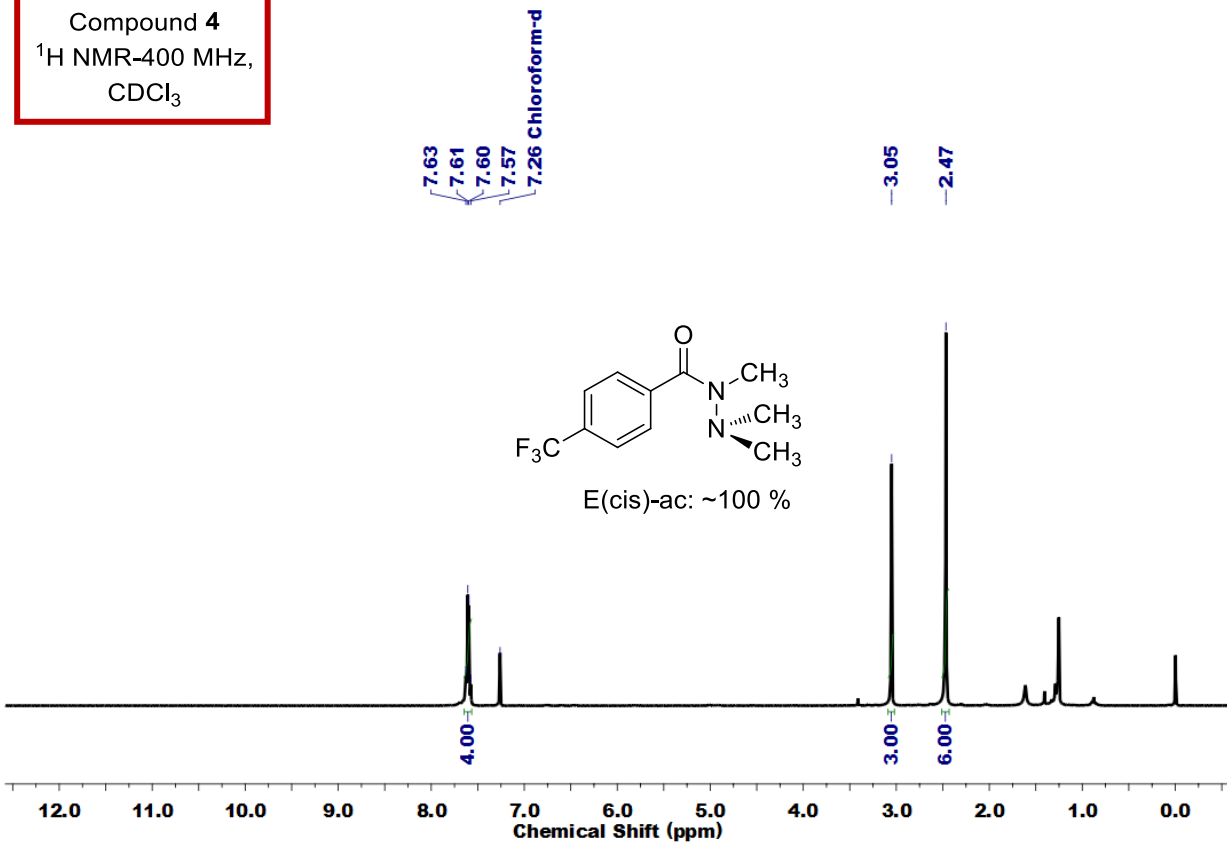

Compound 4  
<sup>19</sup>F NMR-376 MHz,  
CDCl<sub>3</sub>

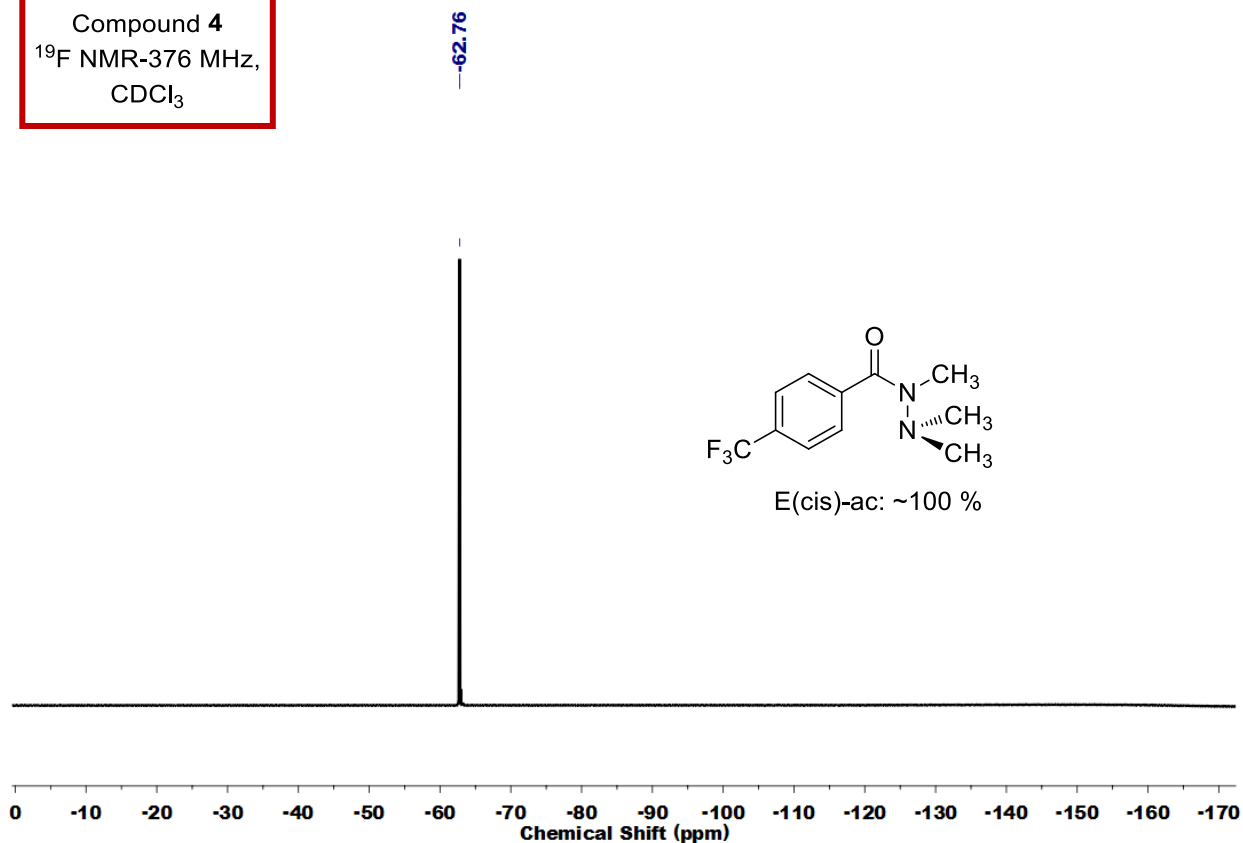

Compound 4  
<sup>13</sup>C NMR-100 MHz,  
CDCl<sub>3</sub>

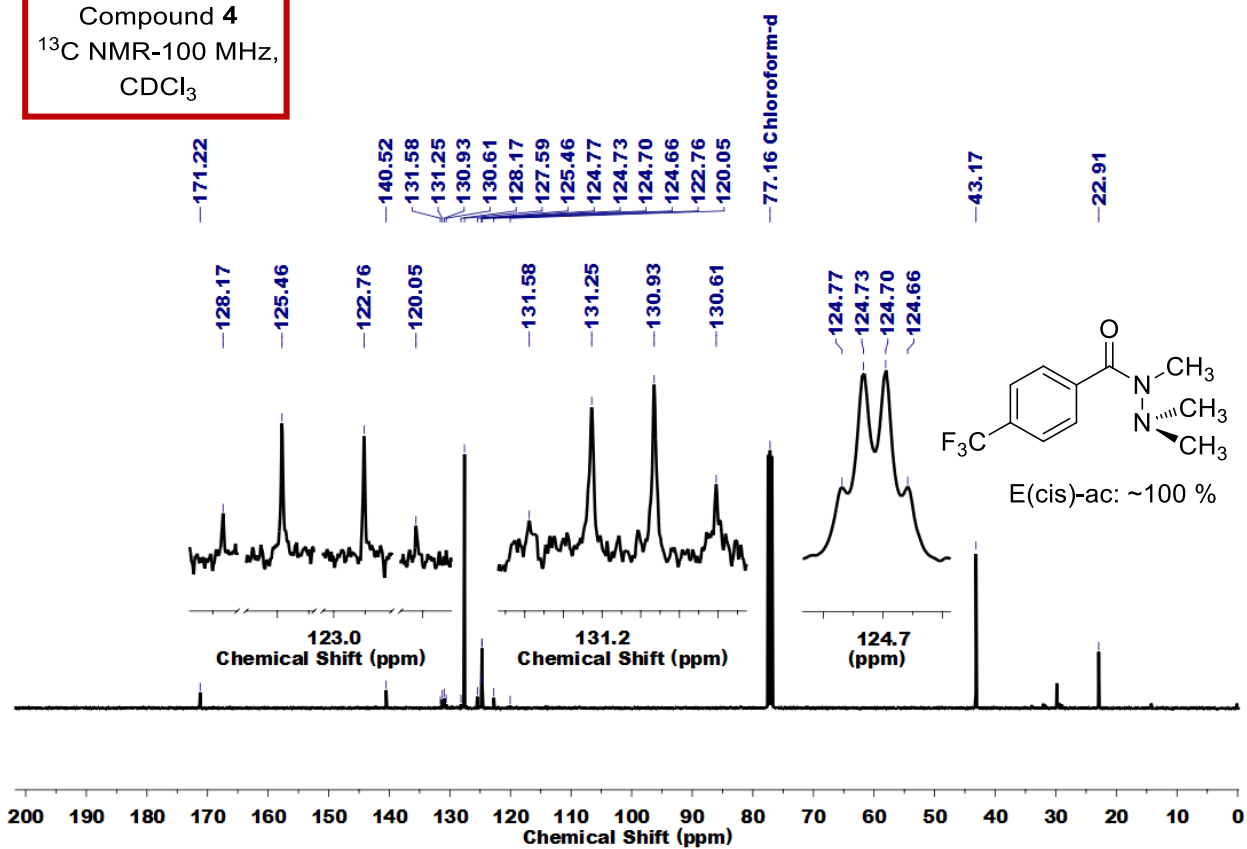

Compound 4  
<sup>1</sup>H NMR-400 MHz,  
[CD<sub>3</sub>]<sub>2</sub>SO

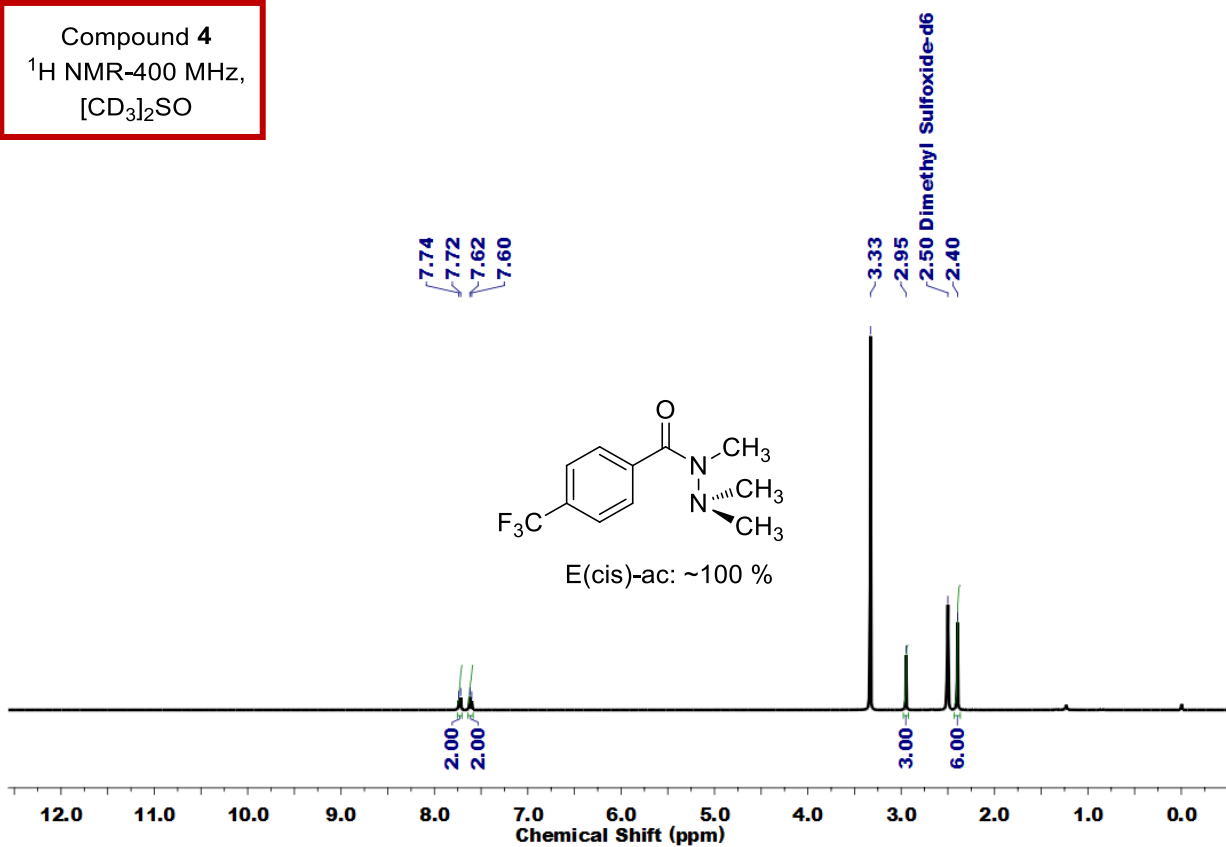

Compound 4  
<sup>19</sup>F NMR-376 MHz,  
[CD<sub>3</sub>]<sub>2</sub>SO

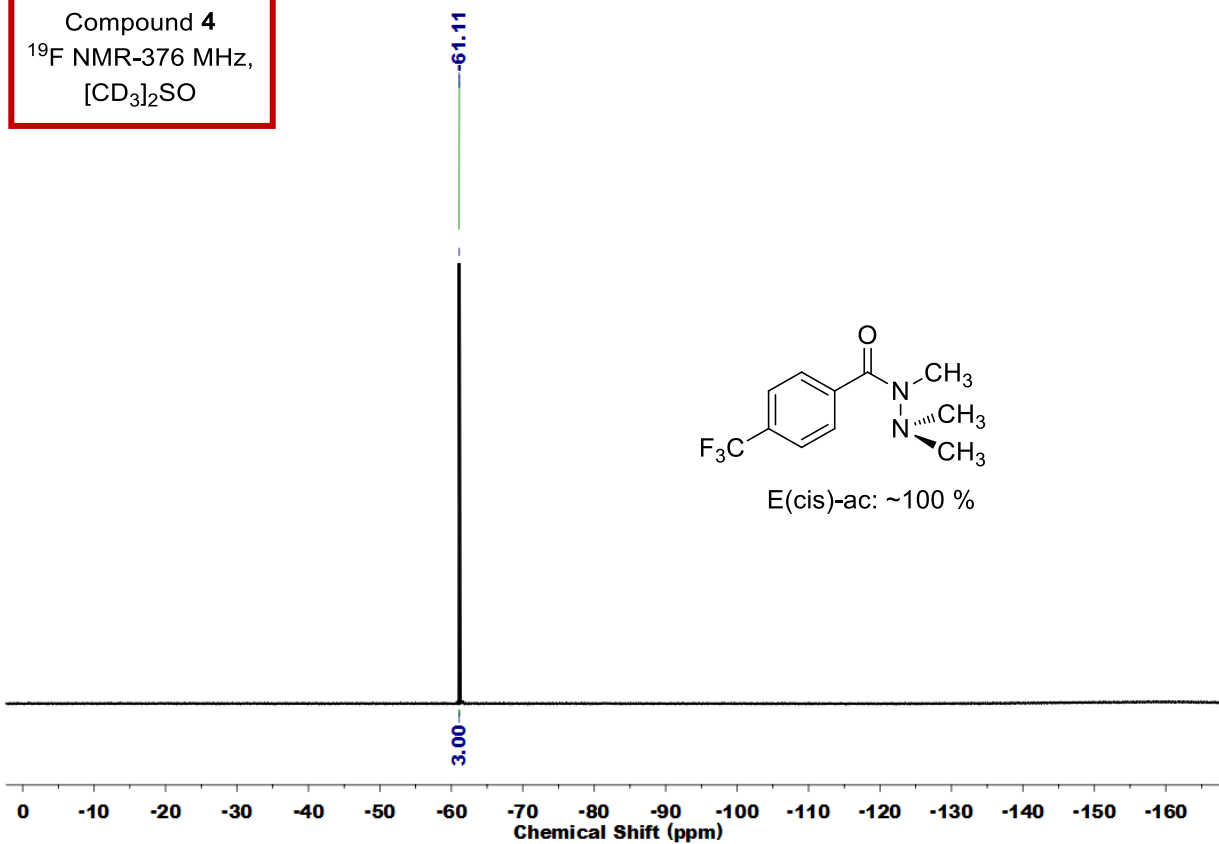

Compound 4  
<sup>1</sup>H NMR-400 MHz,  
CD<sub>3</sub>OD

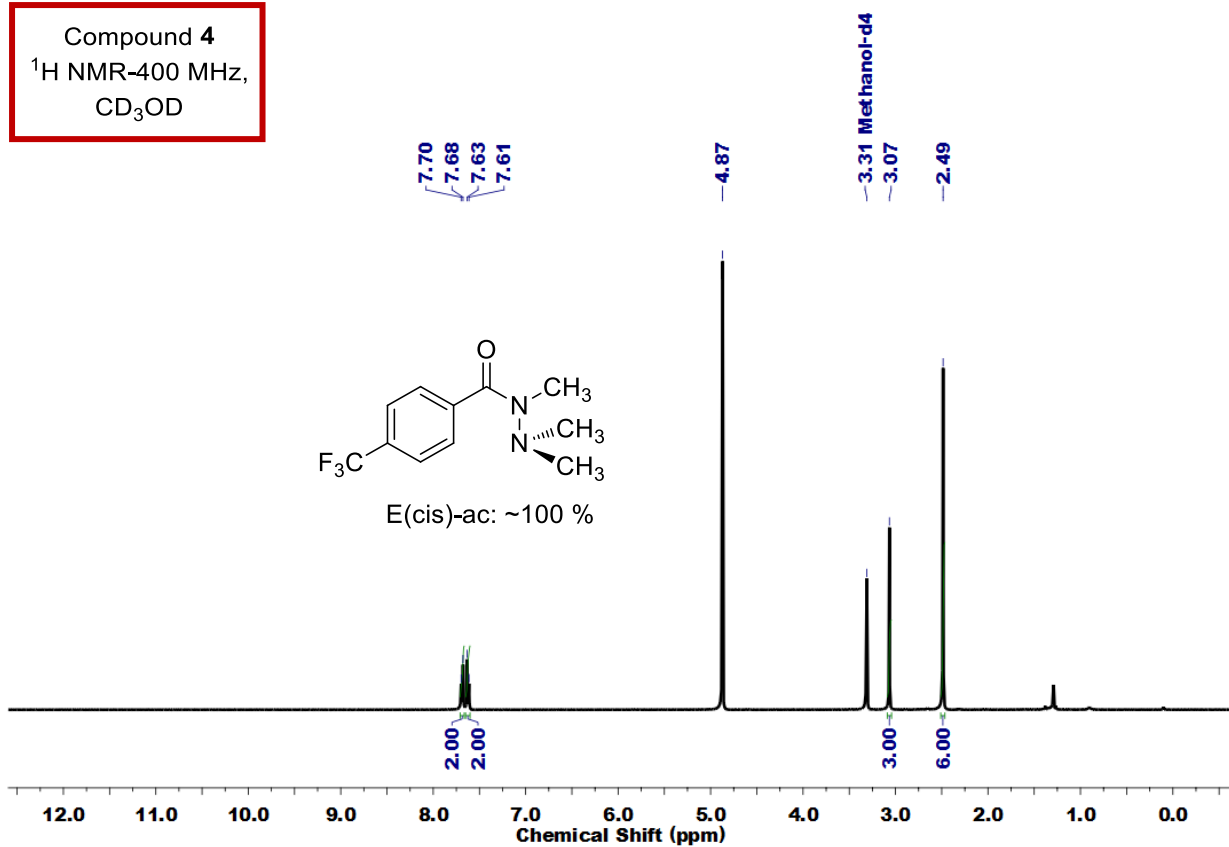

Compound 4  
<sup>19</sup>F NMR-376 MHz,  
CD<sub>3</sub>OD

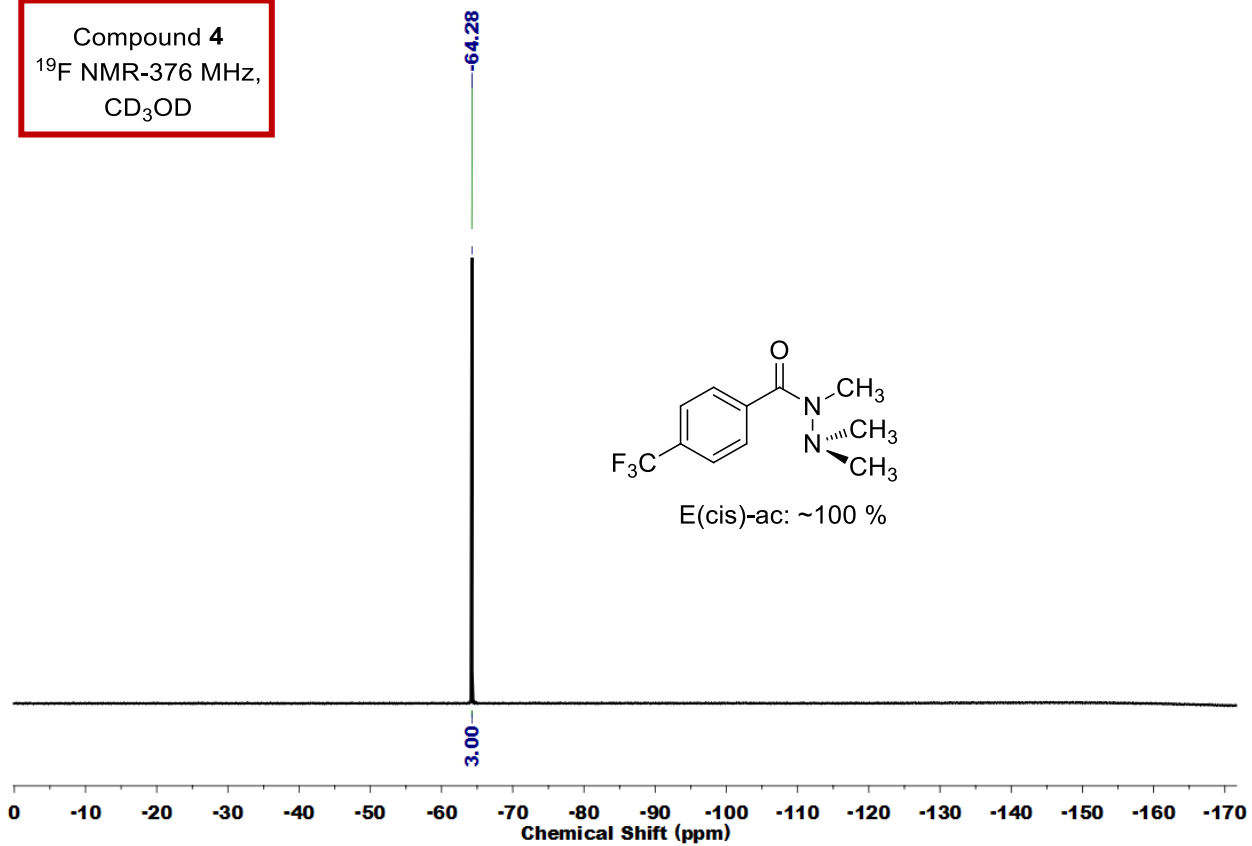

Compound 4  
<sup>1</sup>H NMR-400 MHz,  
CD<sub>3</sub>CN

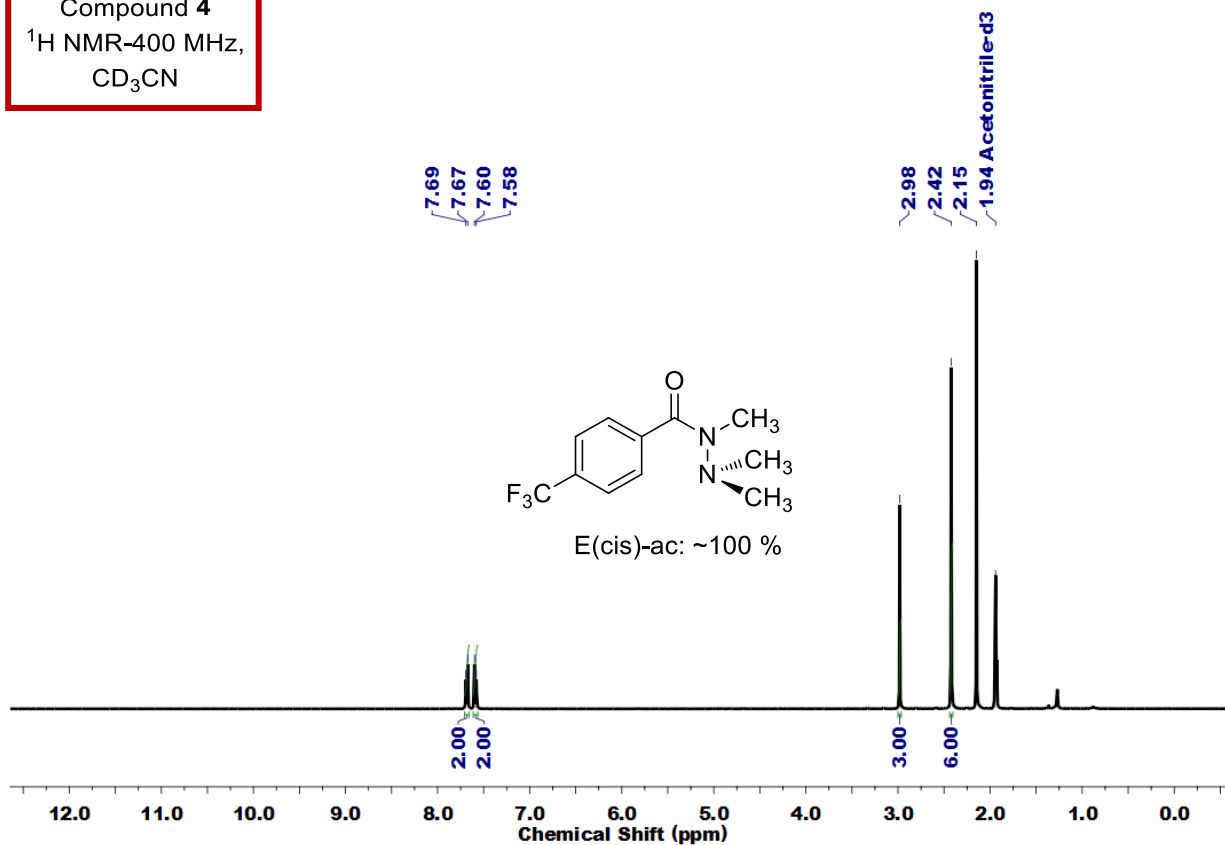

Compound 4  
<sup>19</sup>F NMR-376 MHz,  
CD<sub>3</sub>CN

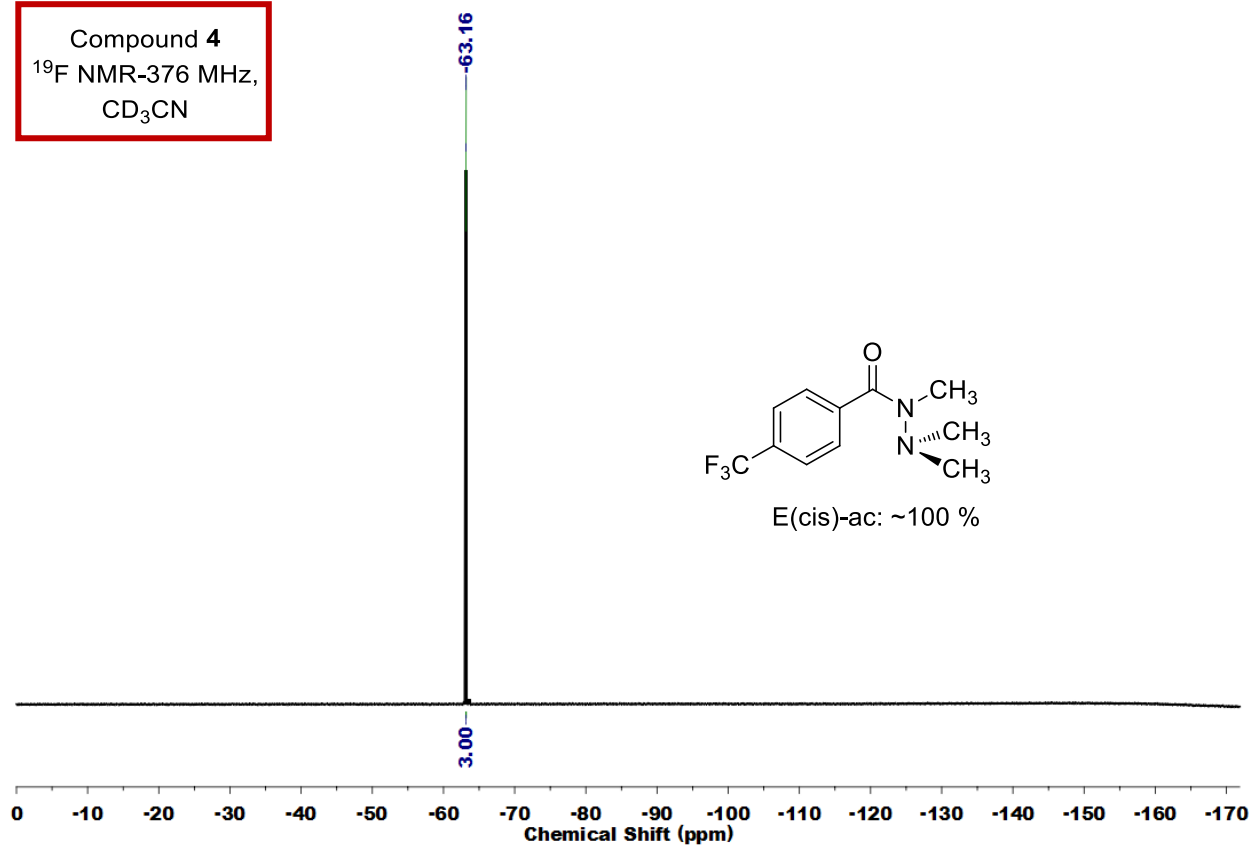

Compound 5  
<sup>1</sup>H NMR-400 MHz,  
CDCl<sub>3</sub>

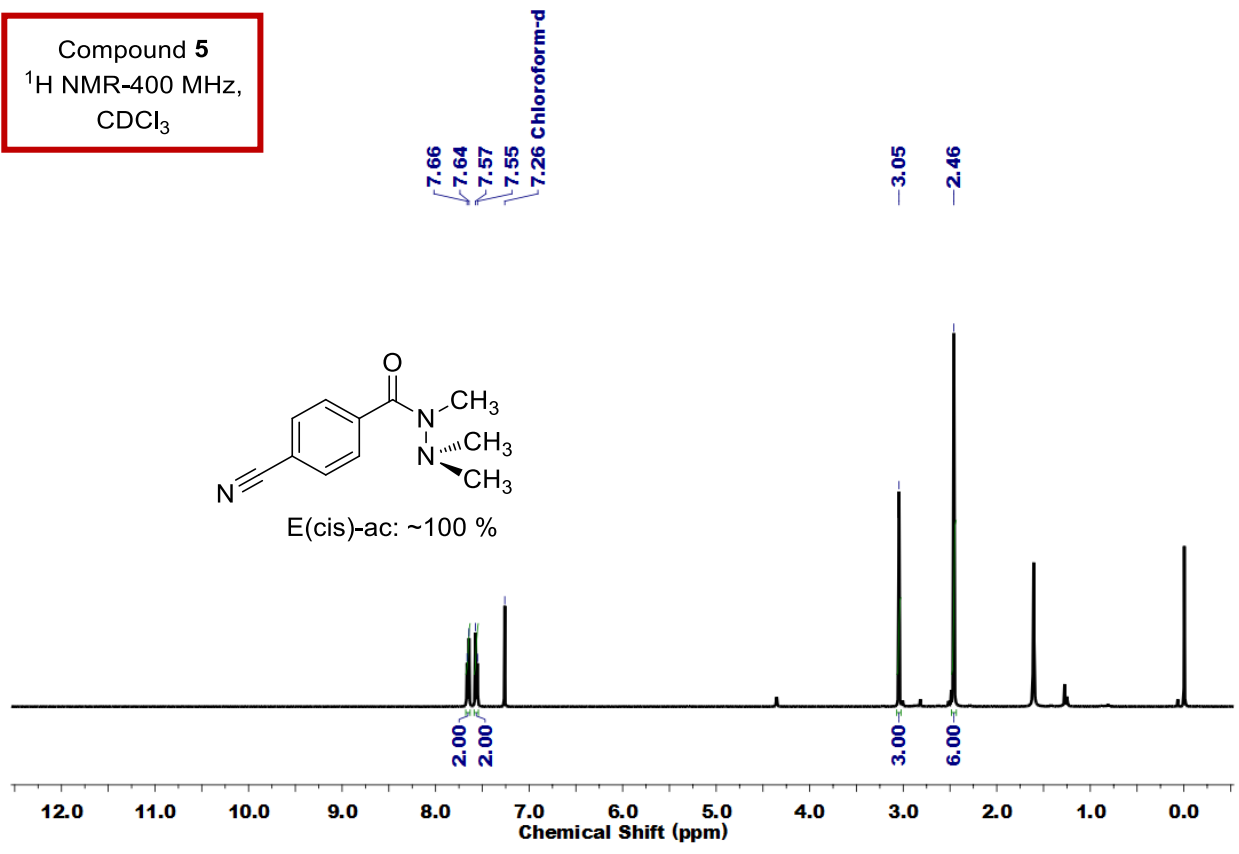

Compound 5  
<sup>13</sup>C NMR-100 MHz,  
CDCl<sub>3</sub>

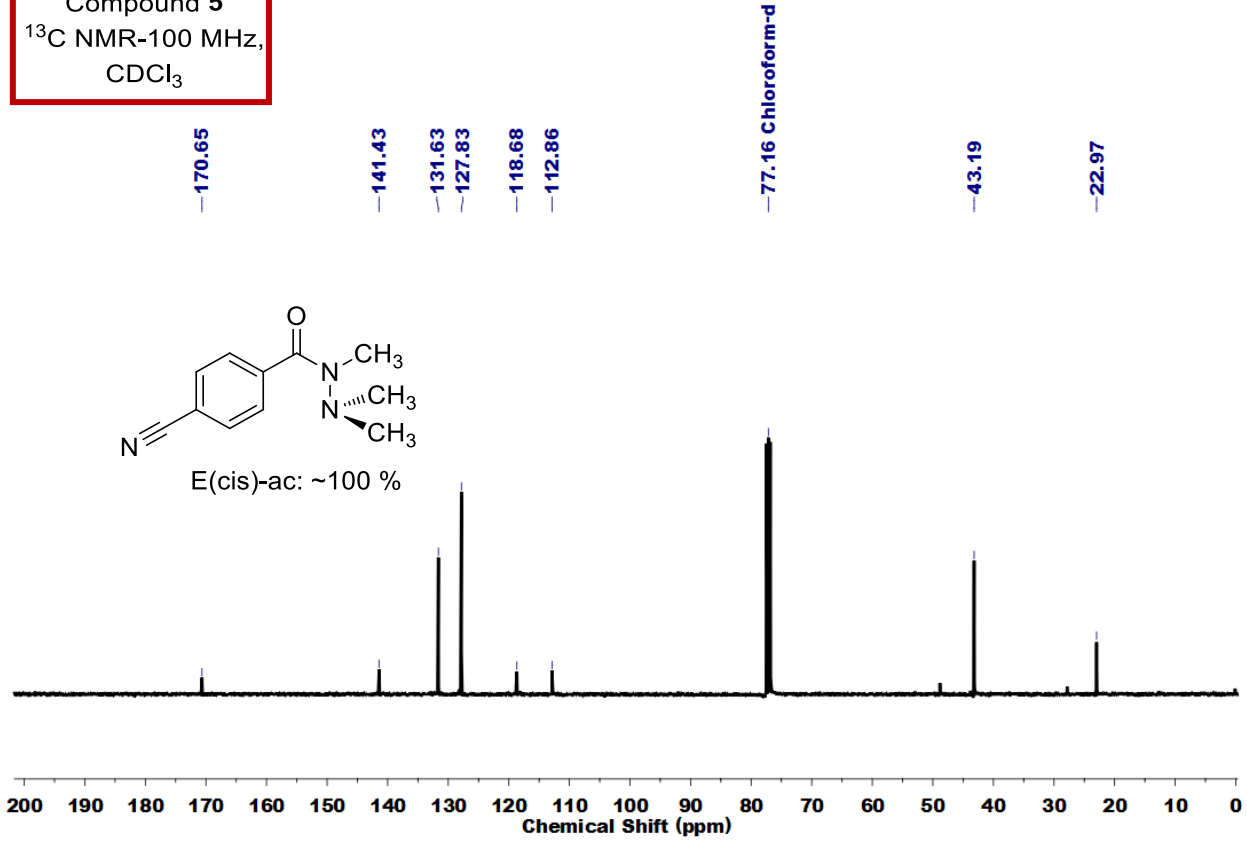

Compound 5  
<sup>1</sup>H NMR-400 MHz,  
[CD<sub>3</sub>]<sub>2</sub>SO

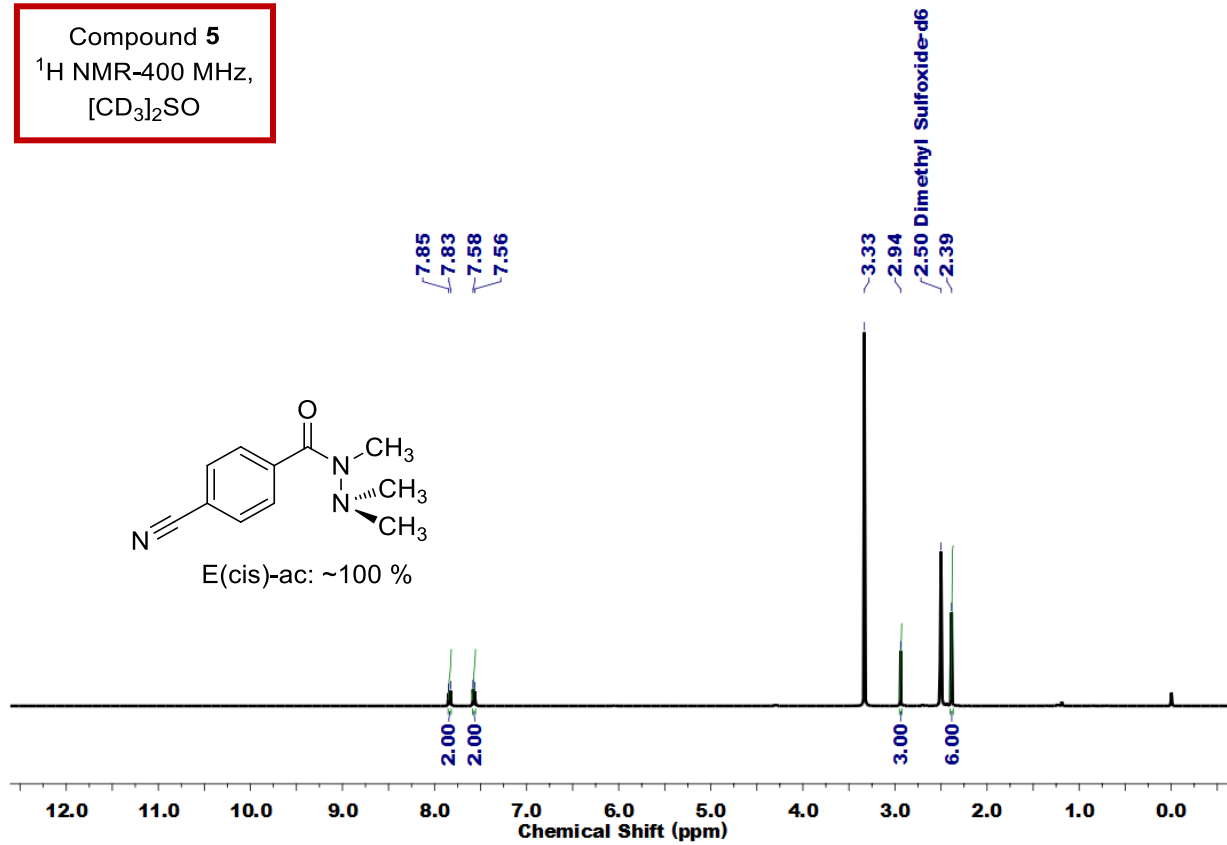

Compound 5  
<sup>1</sup>H NMR-400 MHz,  
CD<sub>3</sub>OD

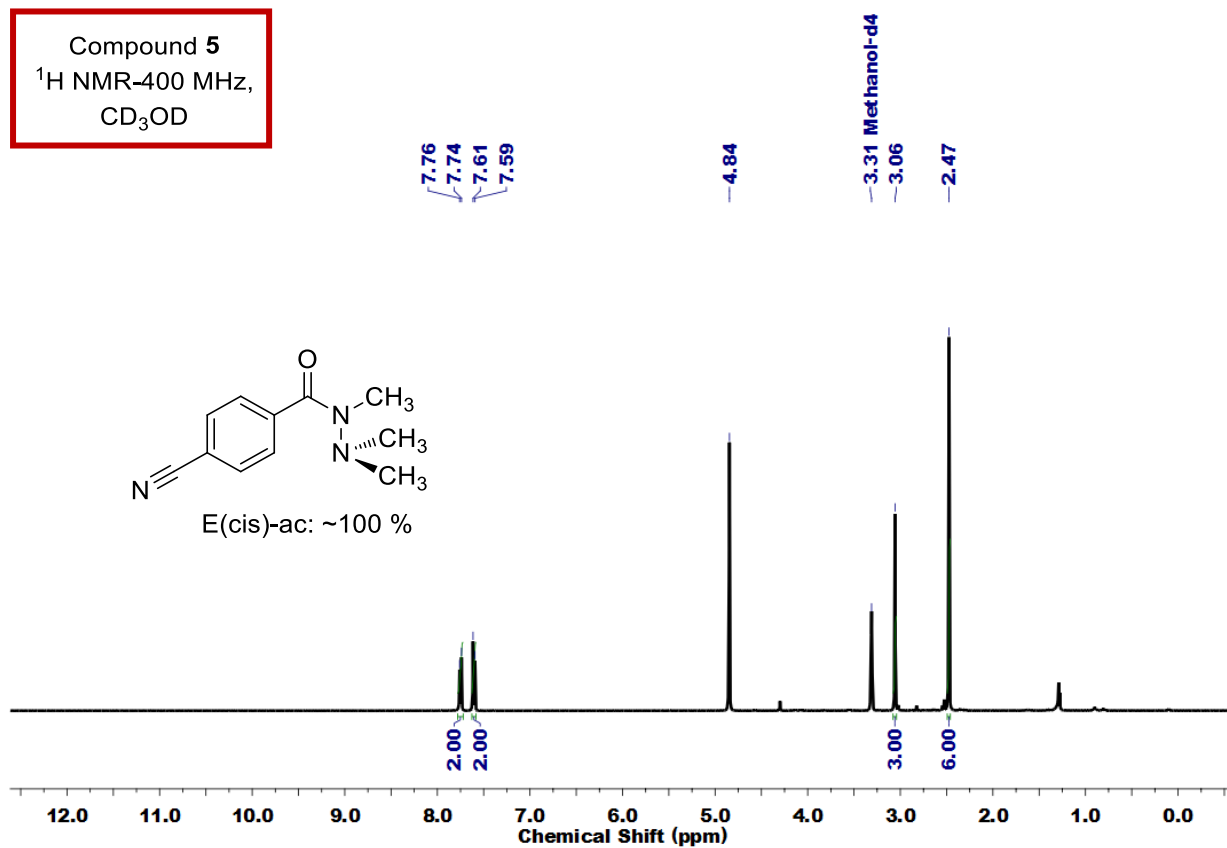



Compound 5  
<sup>1</sup>H NMR-400 MHz,  
CD<sub>3</sub>CN

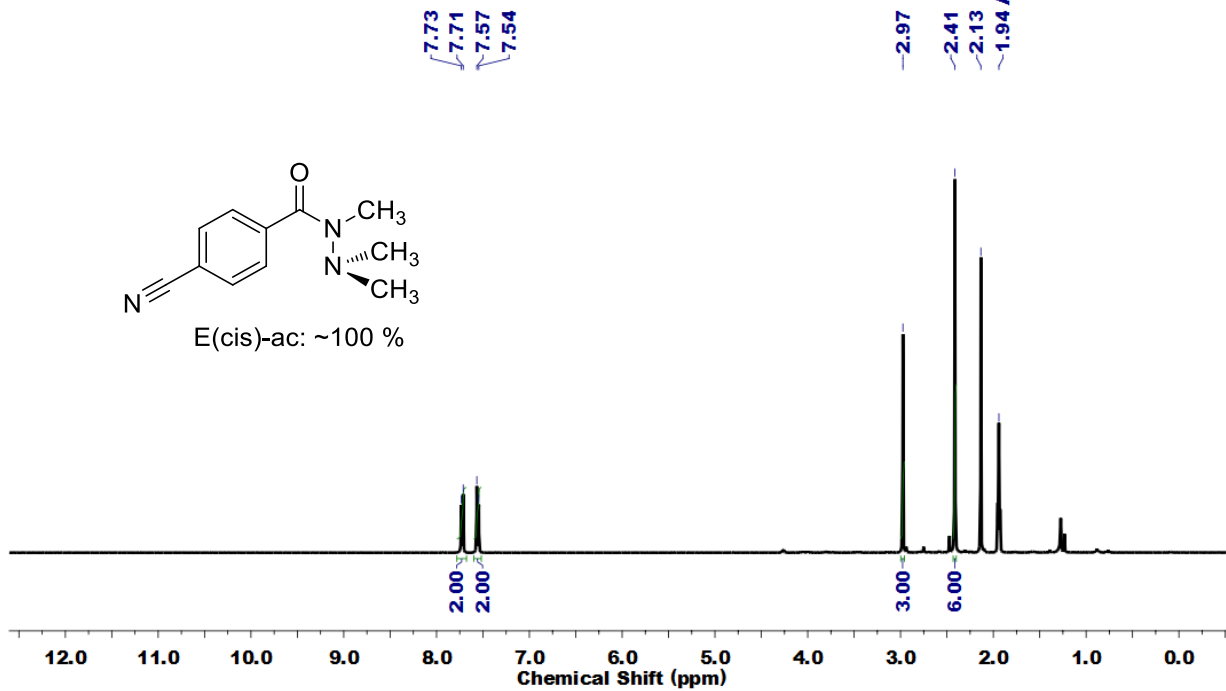

Compound 6  
<sup>1</sup>H NMR-400 MHz,  
CDCl<sub>3</sub>

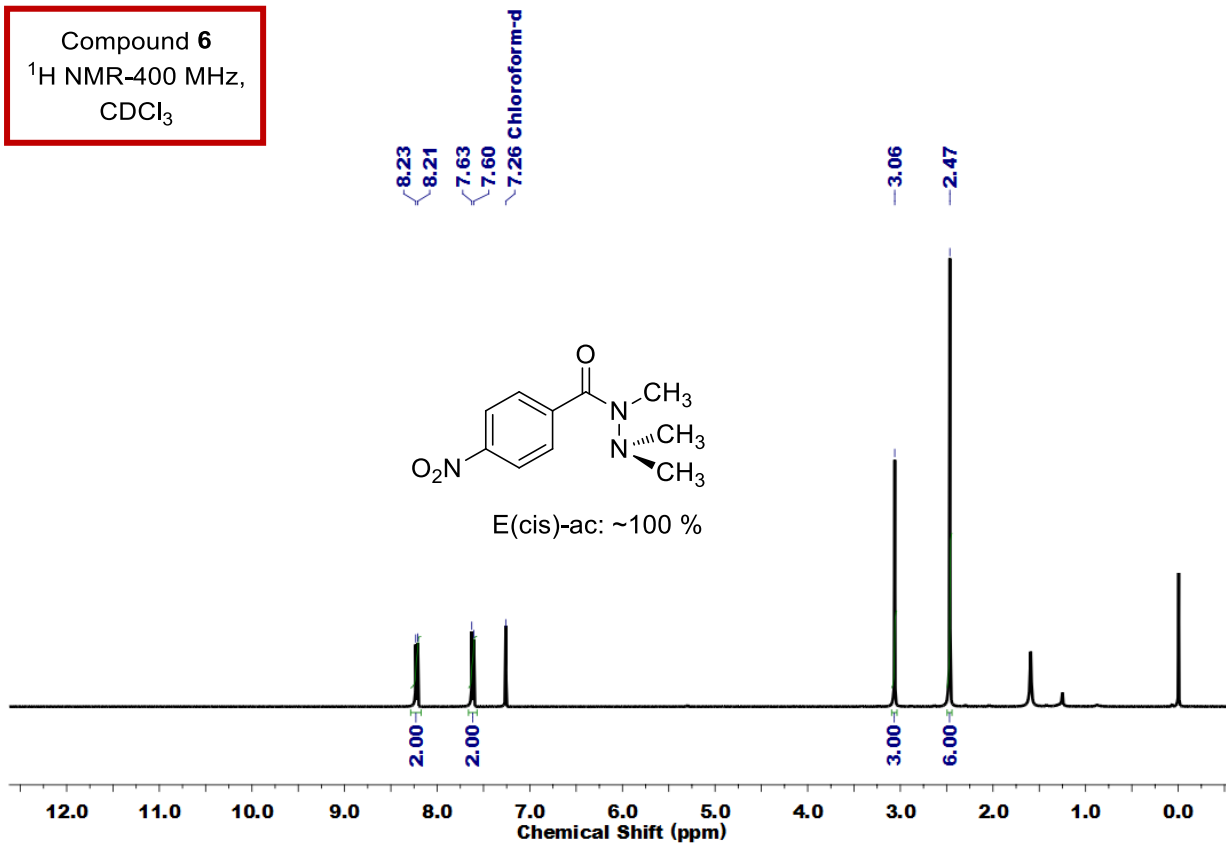

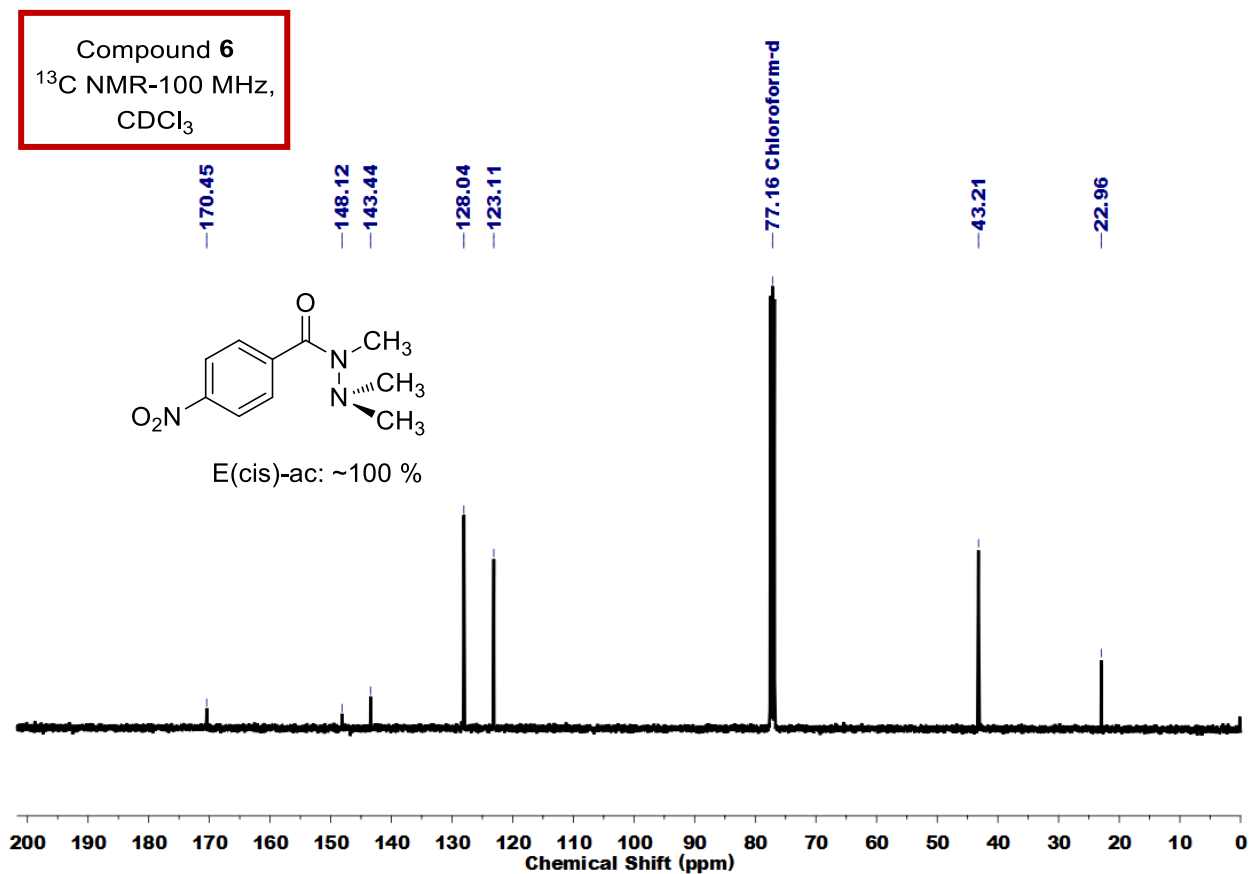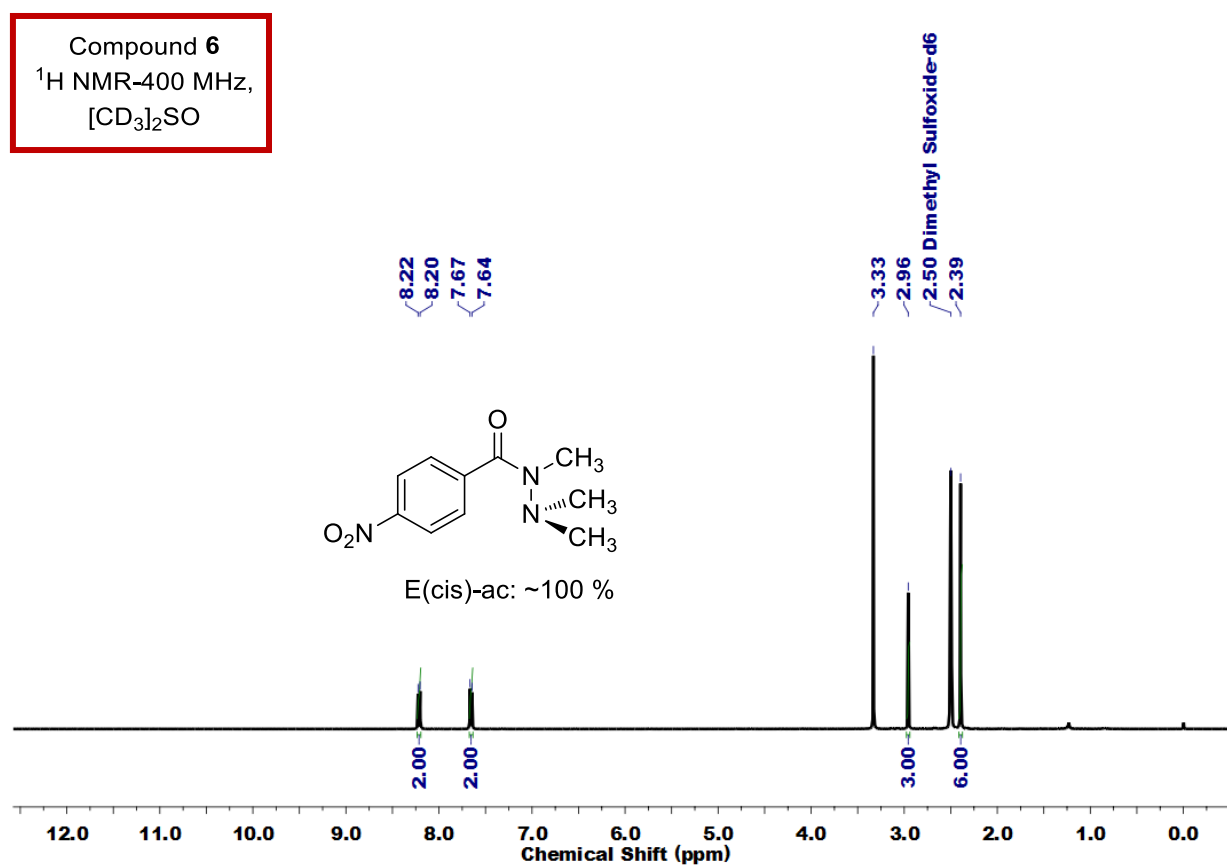

Compound 6  
<sup>1</sup>H NMR-400 MHz,  
 CD<sub>3</sub>OD

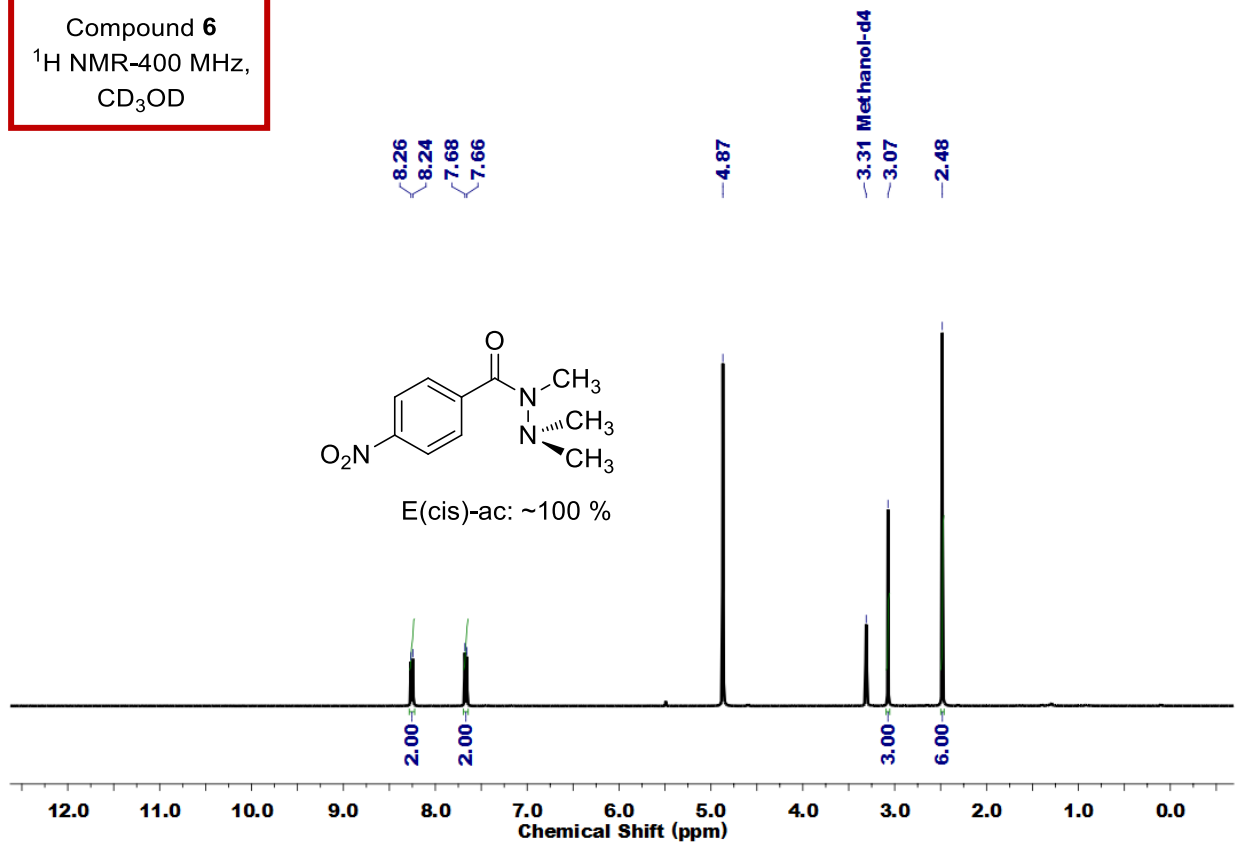

Compound 6  
<sup>1</sup>H NMR-400 MHz,  
 CD<sub>3</sub>CN

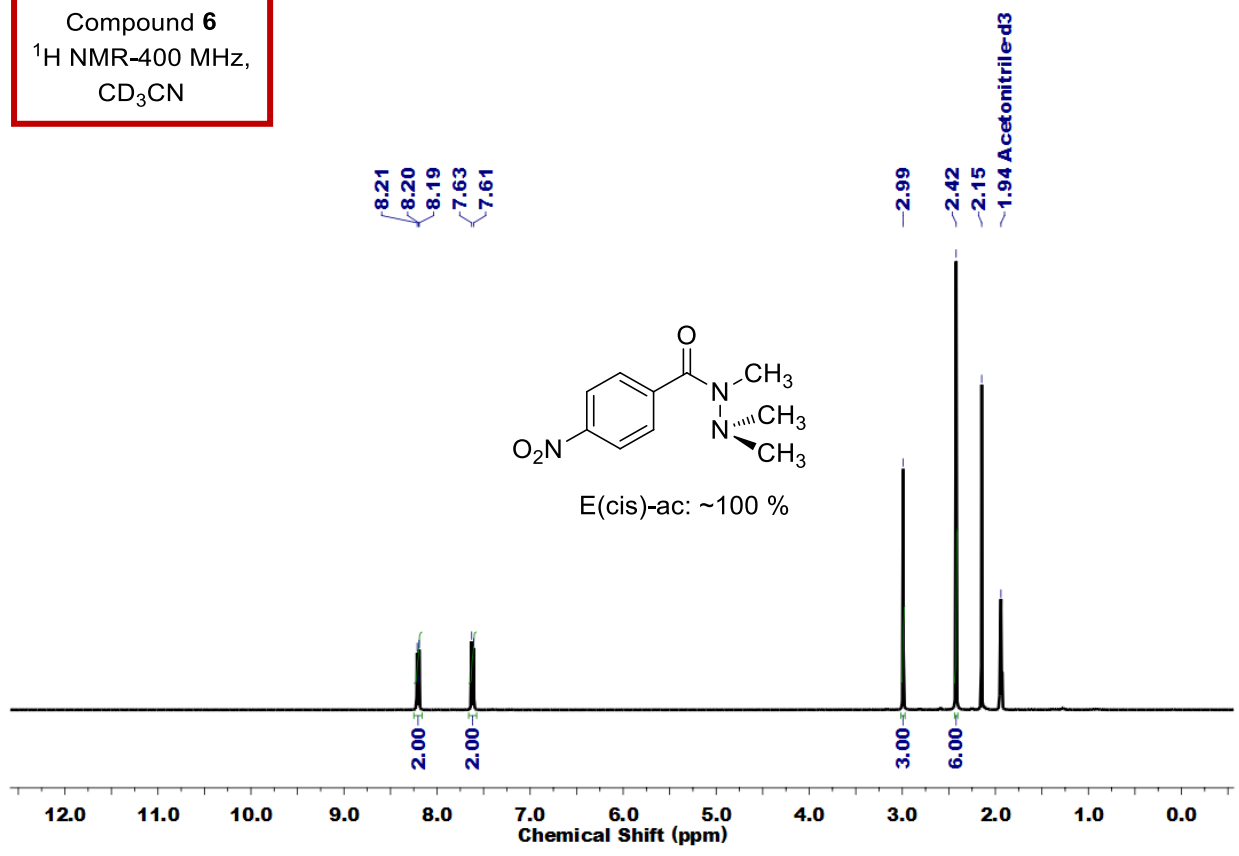

Compound 13  
<sup>1</sup>H NMR-400 MHz,  
CDCl<sub>3</sub>

-7.26 Chloroform-d

-3.08

-2.47

-1.60

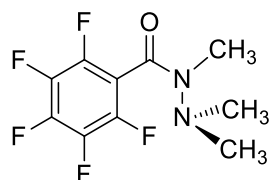

E(cis)-ac: ~100 %

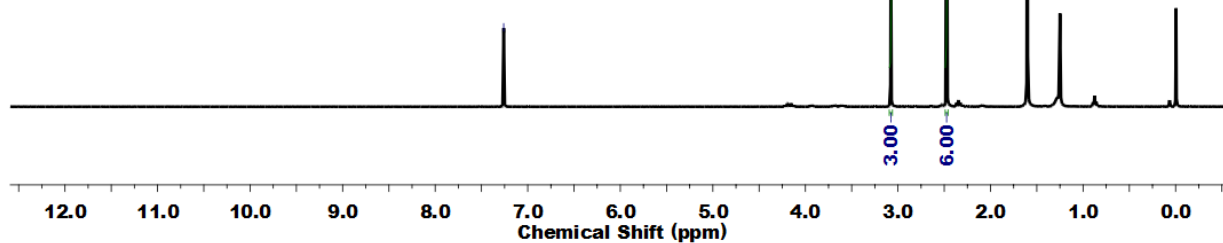

Compound 13  
<sup>13</sup>C NMR-100 MHz,  
CDCl<sub>3</sub>

-160.53

-144.12

-142.34

-141.75

-141.66

-141.63

-138.75

-138.72

-136.23

-136.11

-114.19

-113.56

-113.52

-77.16 Chloroform-d

-43.64

-22.88

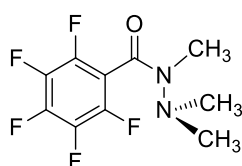

E(cis)-ac: ~100 %

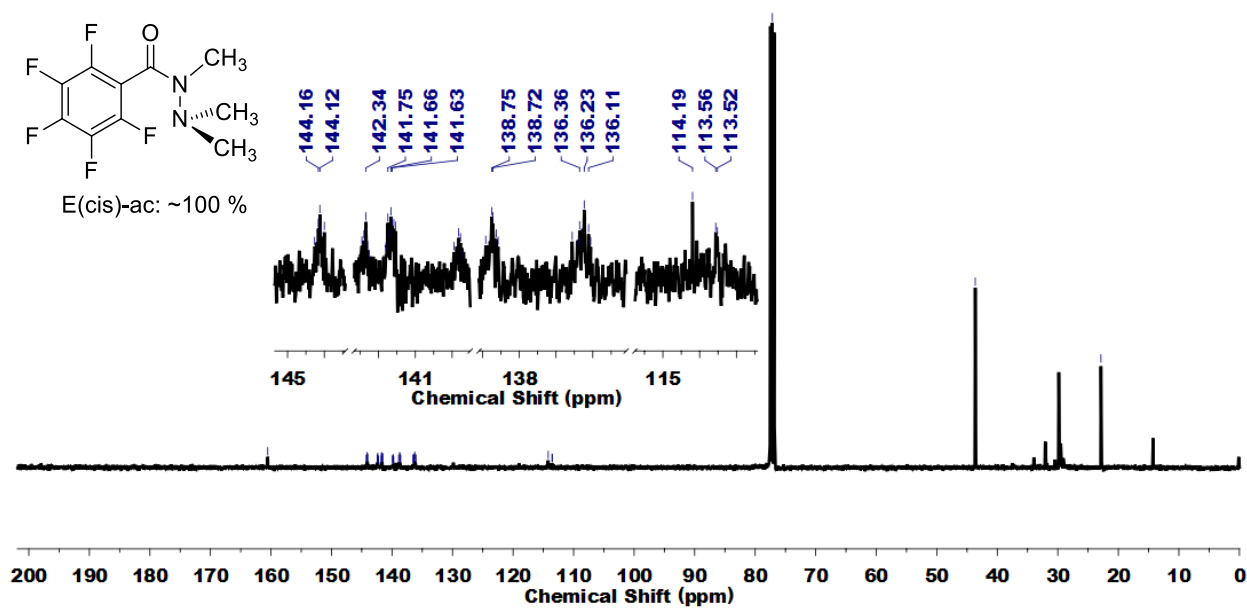

Compound 13  
 $^{19}\text{F}$  NMR-376 MHz,  
 $\text{CDCl}_3$

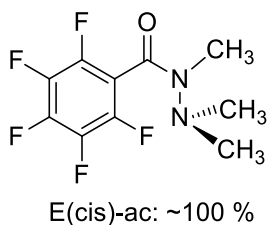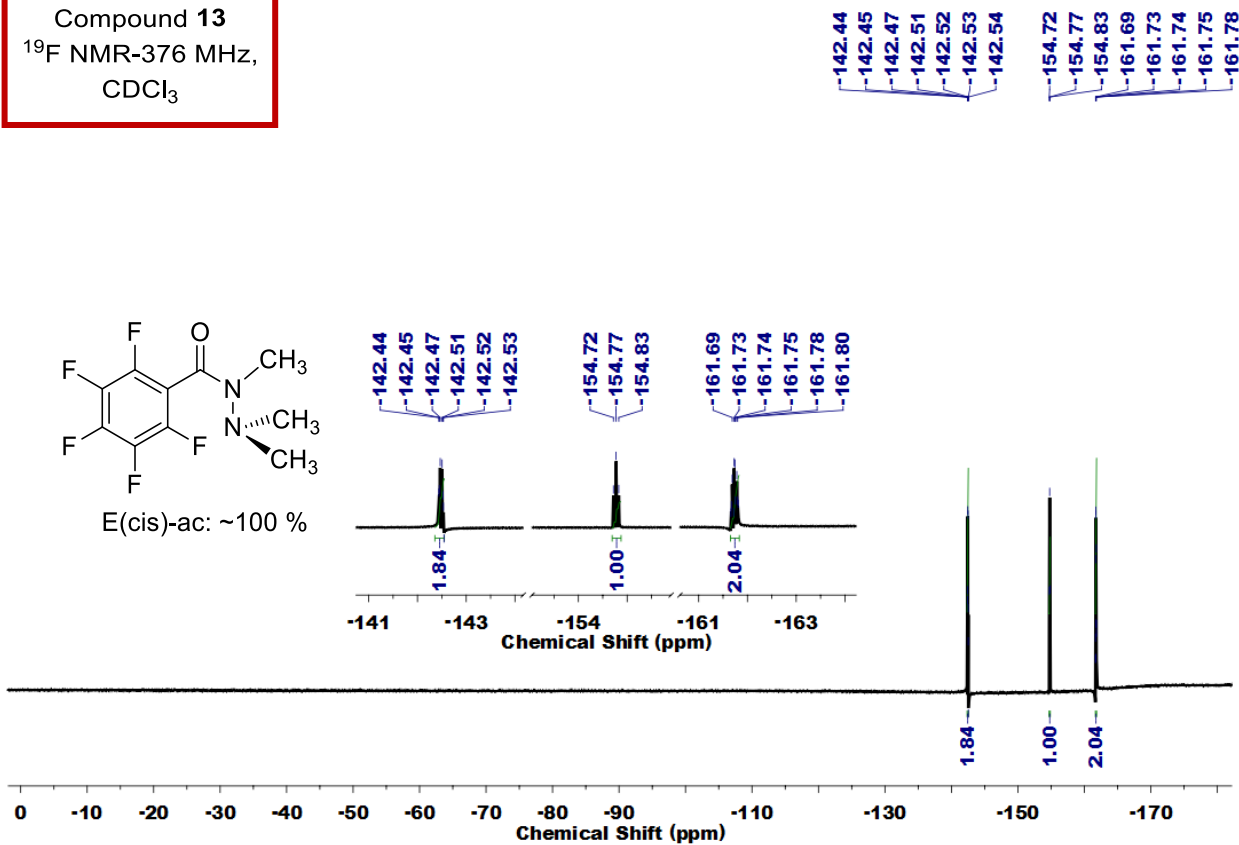

Compound 13  
 $^1\text{H}$  NMR-400 MHz,  
 $[\text{CD}_3]_2\text{SO}$

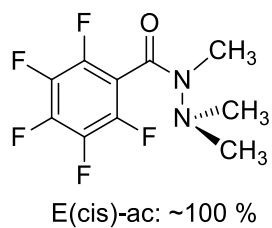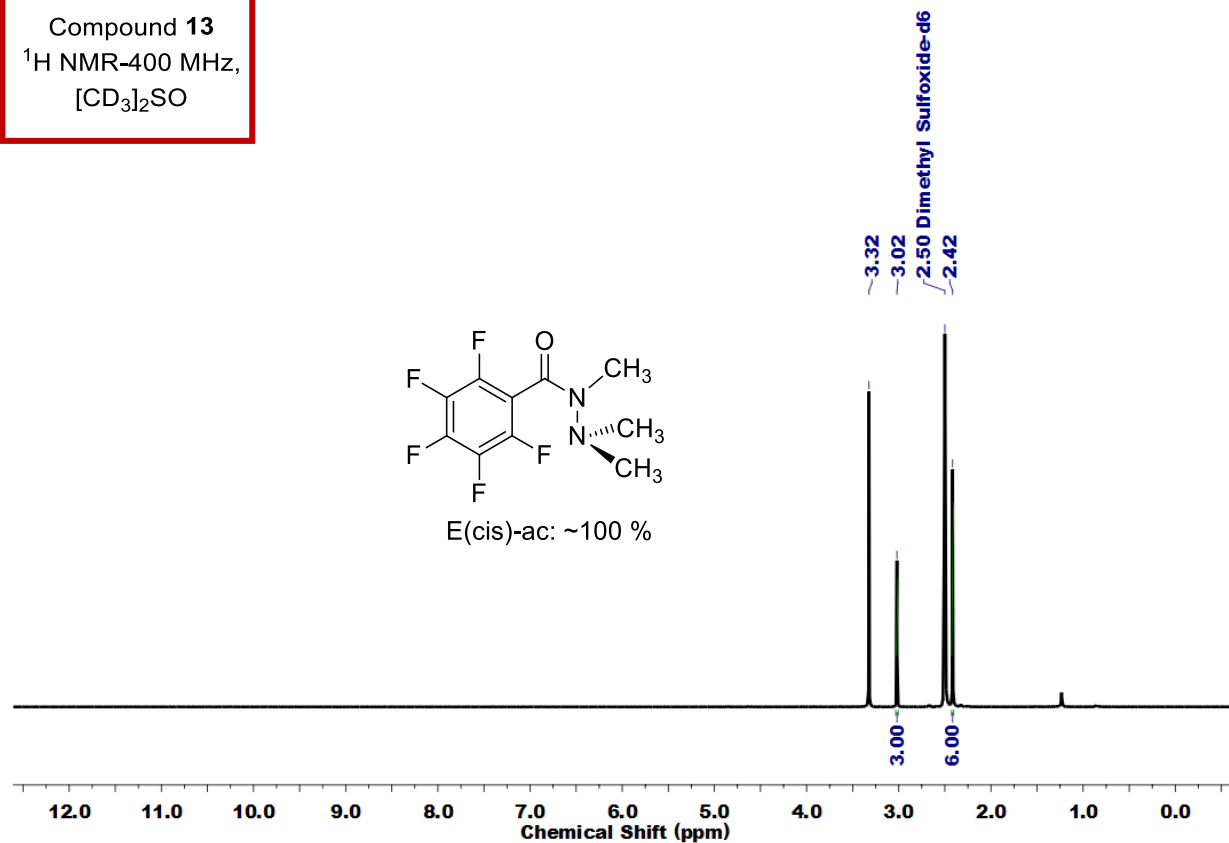

Compound 13  
 $^{19}\text{F}$  NMR-376 MHz,  
[CD<sub>3</sub>]<sub>2</sub>SO

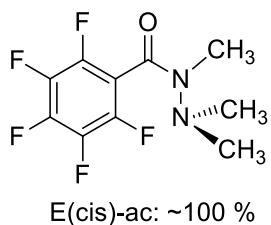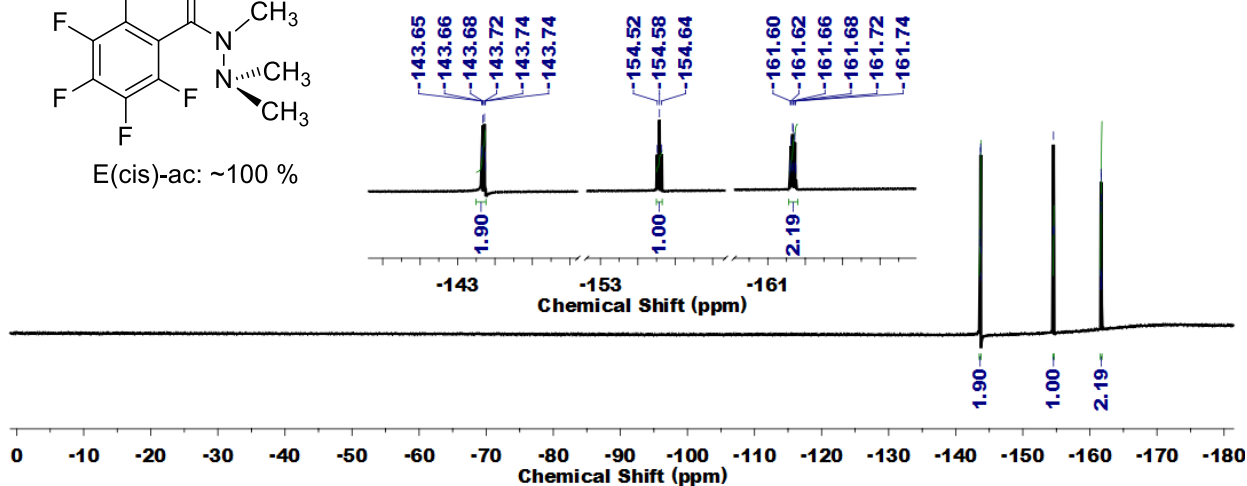

Compound 13  
 $^1\text{H}$  NMR-400 MHz,  
CD<sub>3</sub>OD

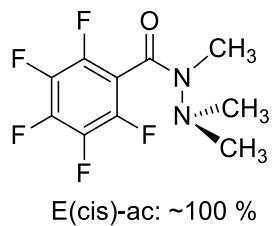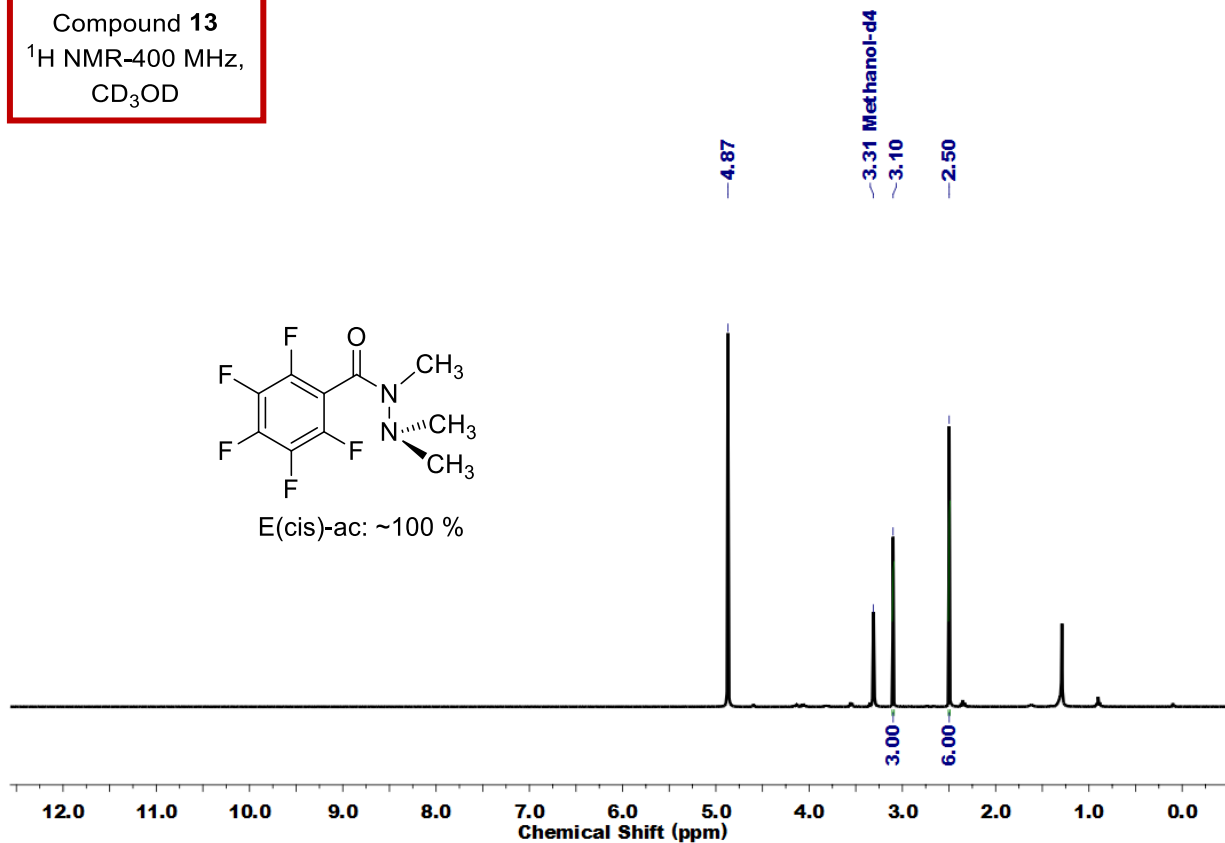

Compound 13  
<sup>19</sup>F NMR-376 MHz,  
CD<sub>3</sub>OD

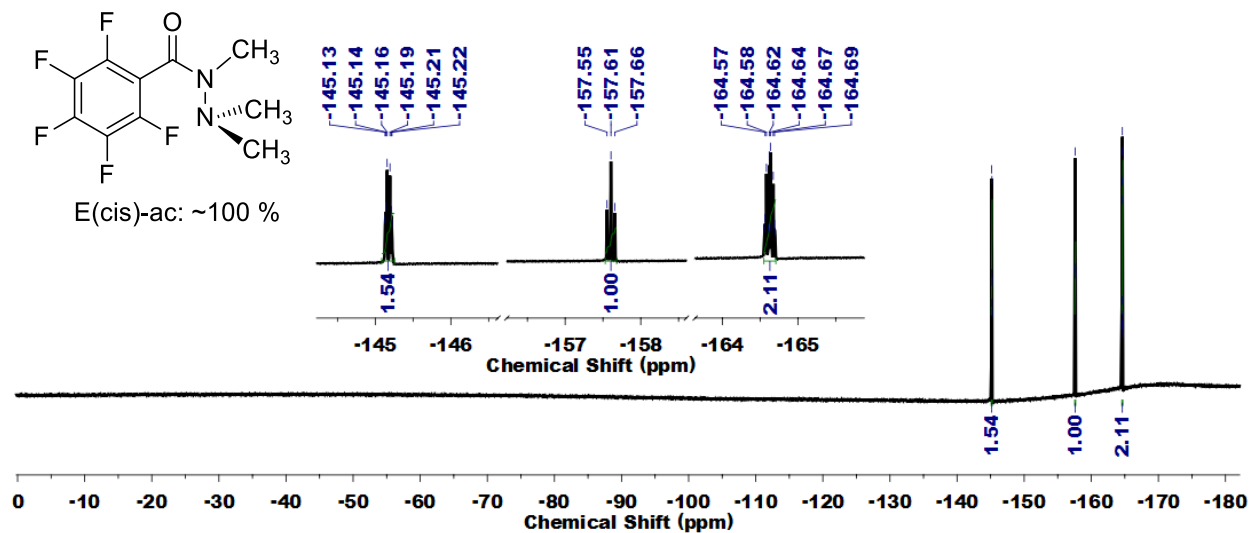

Compound 13  
<sup>1</sup>H NMR-400 MHz,  
CD<sub>3</sub>CN

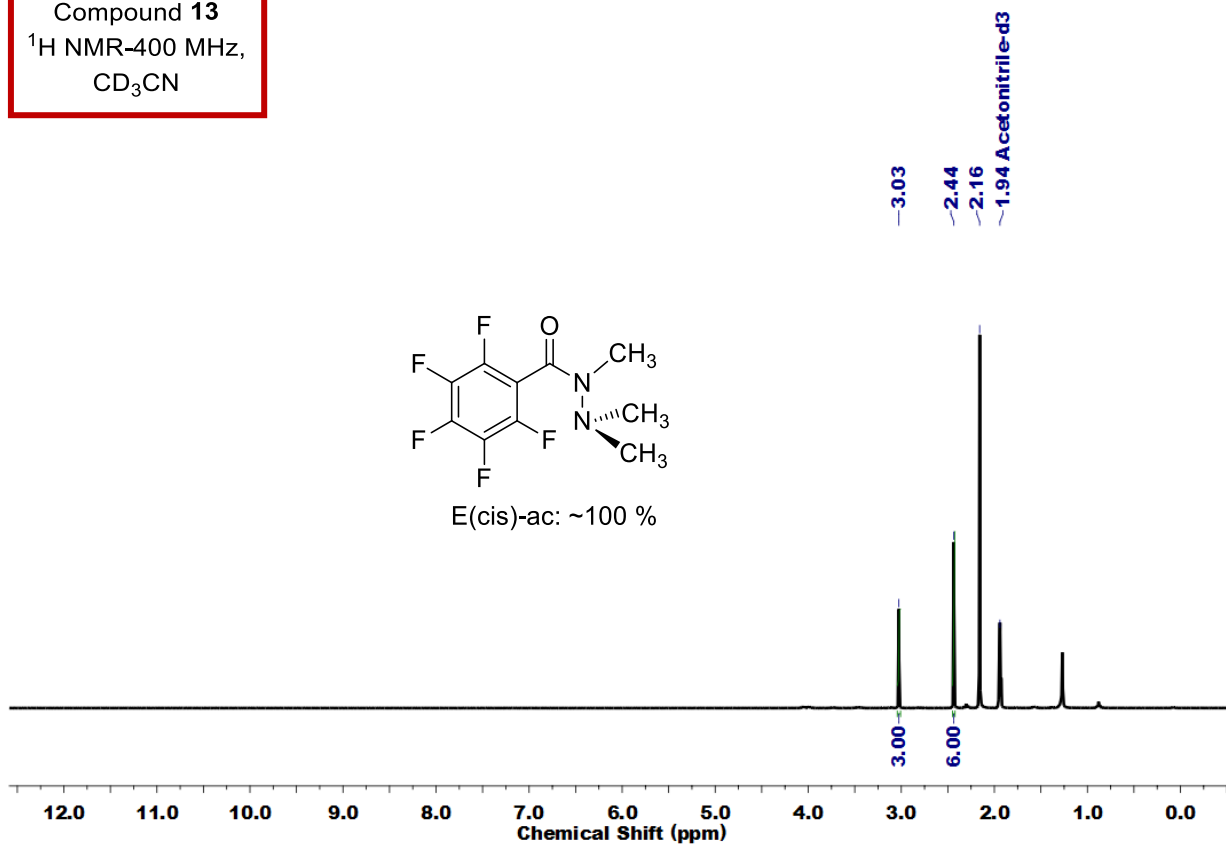

Compound 13  
 $^{19}\text{F}$  NMR-376 MHz,  
 $\text{CD}_3\text{CN}$

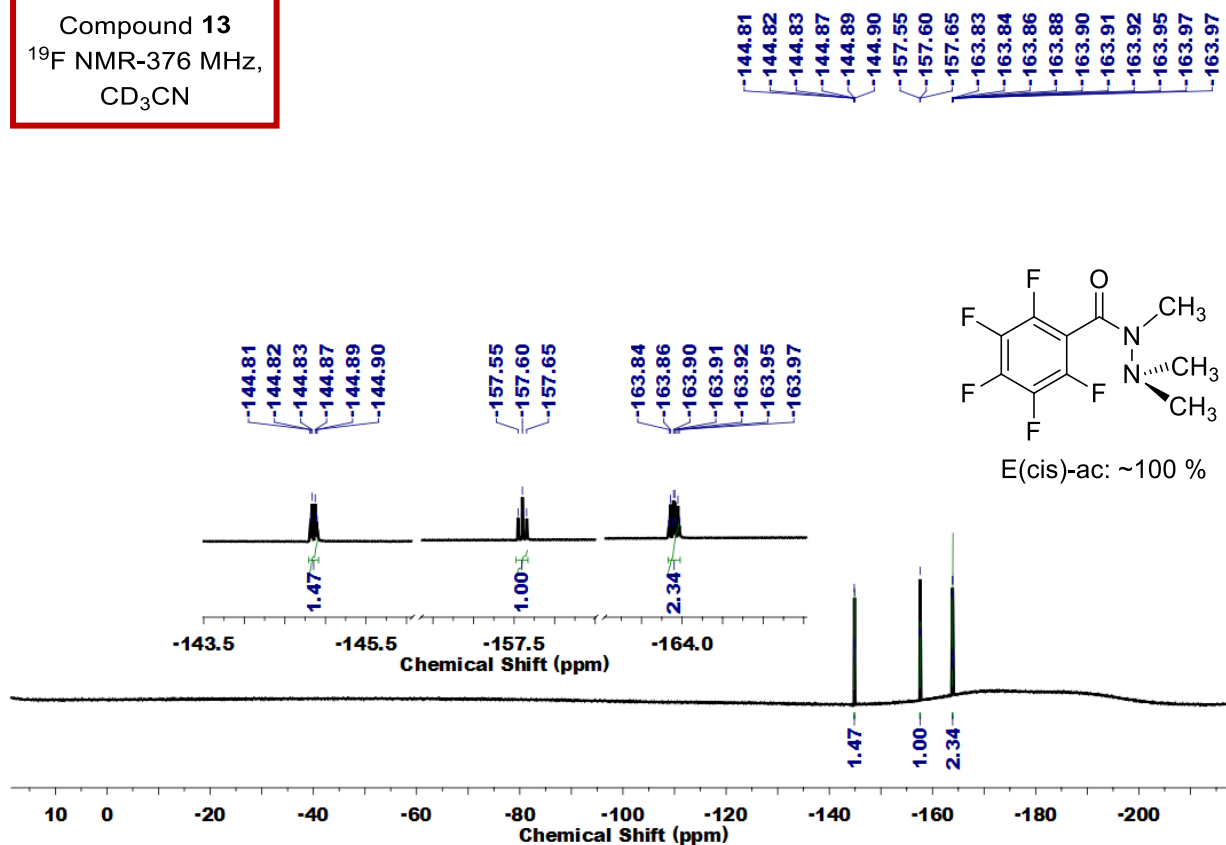



Compound 14  
<sup>1</sup>H NMR-400 MHz,  
 CDCl<sub>3</sub>

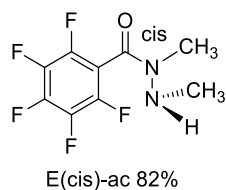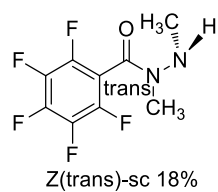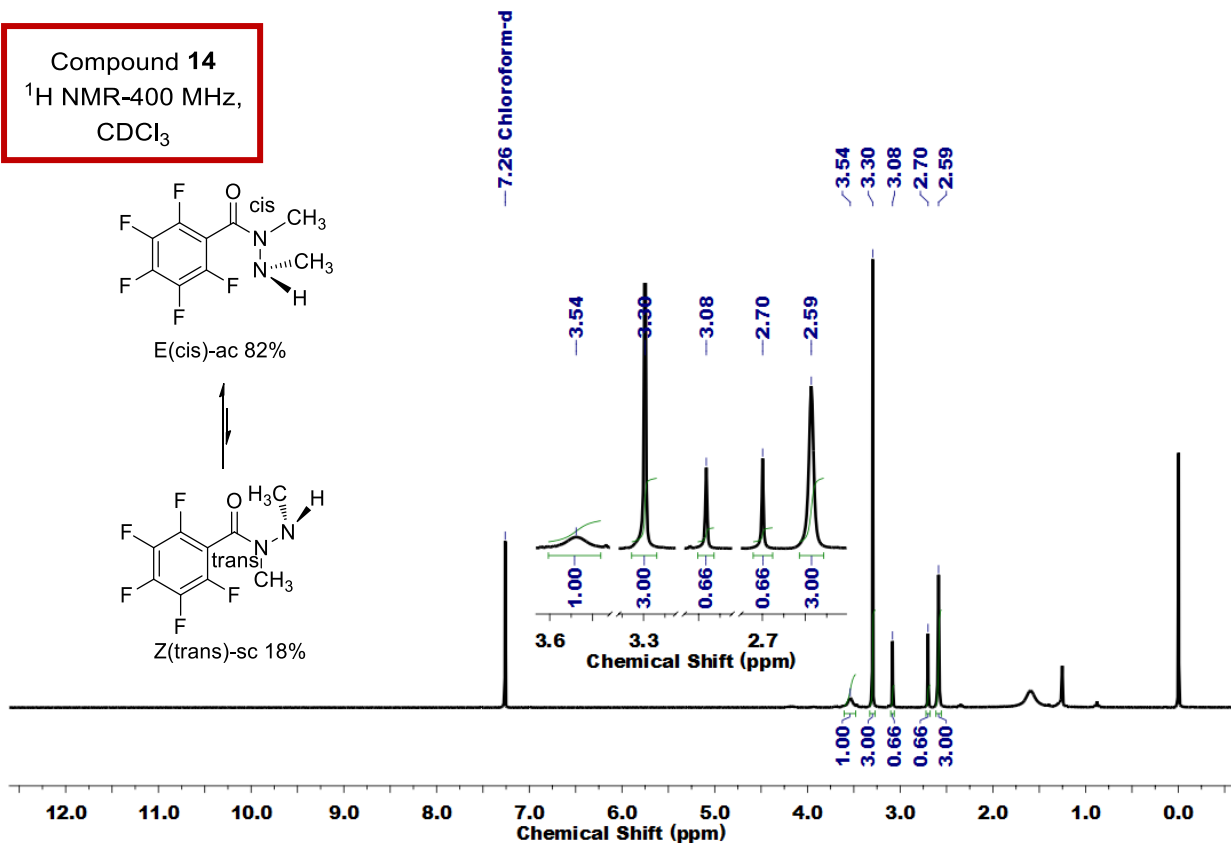

Compound 14  
<sup>13</sup>C NMR-100 MHz,  
 CDCl<sub>3</sub>

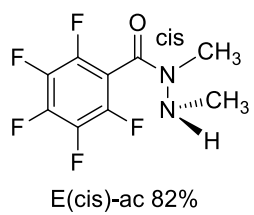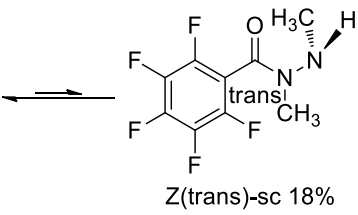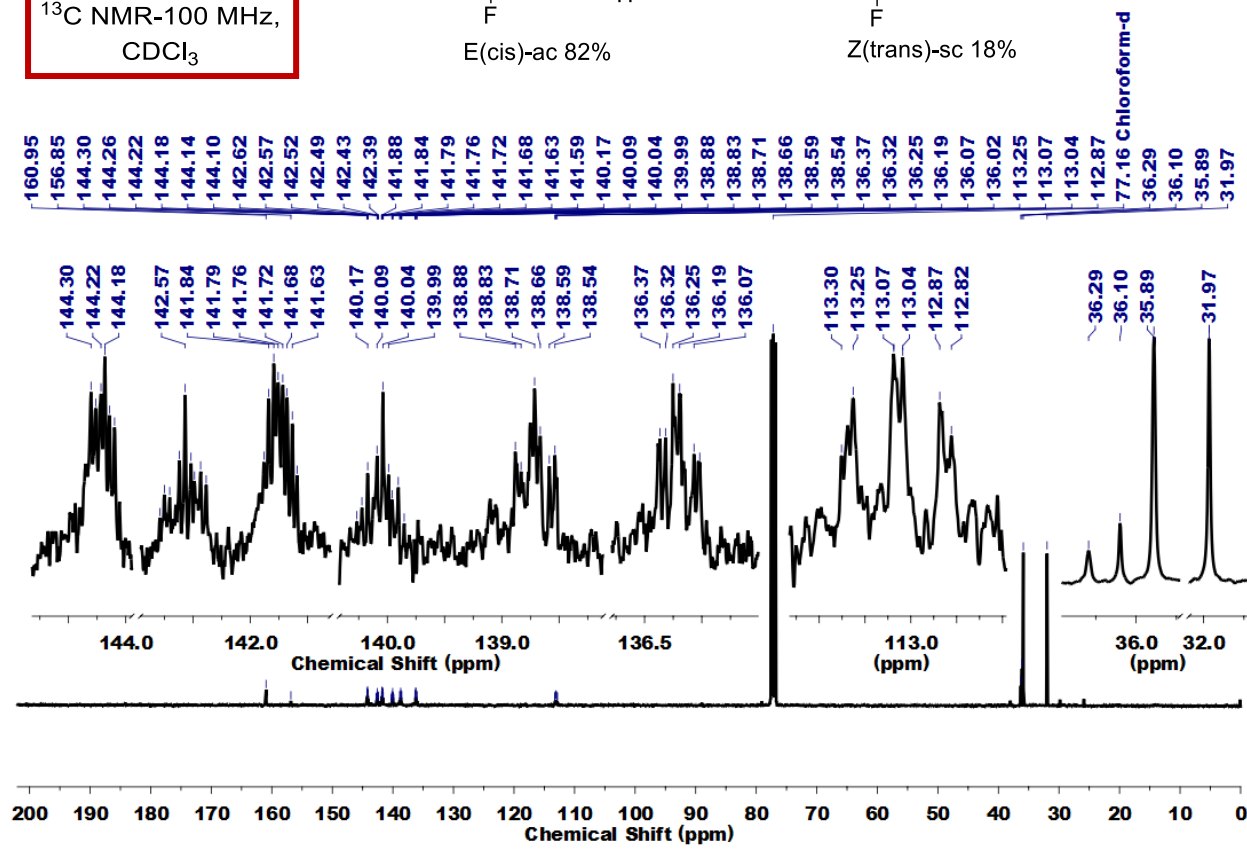

Compound 14  
 $^{19}\text{F}$  NMR-376 MHz,  
 $\text{CDCl}_3$

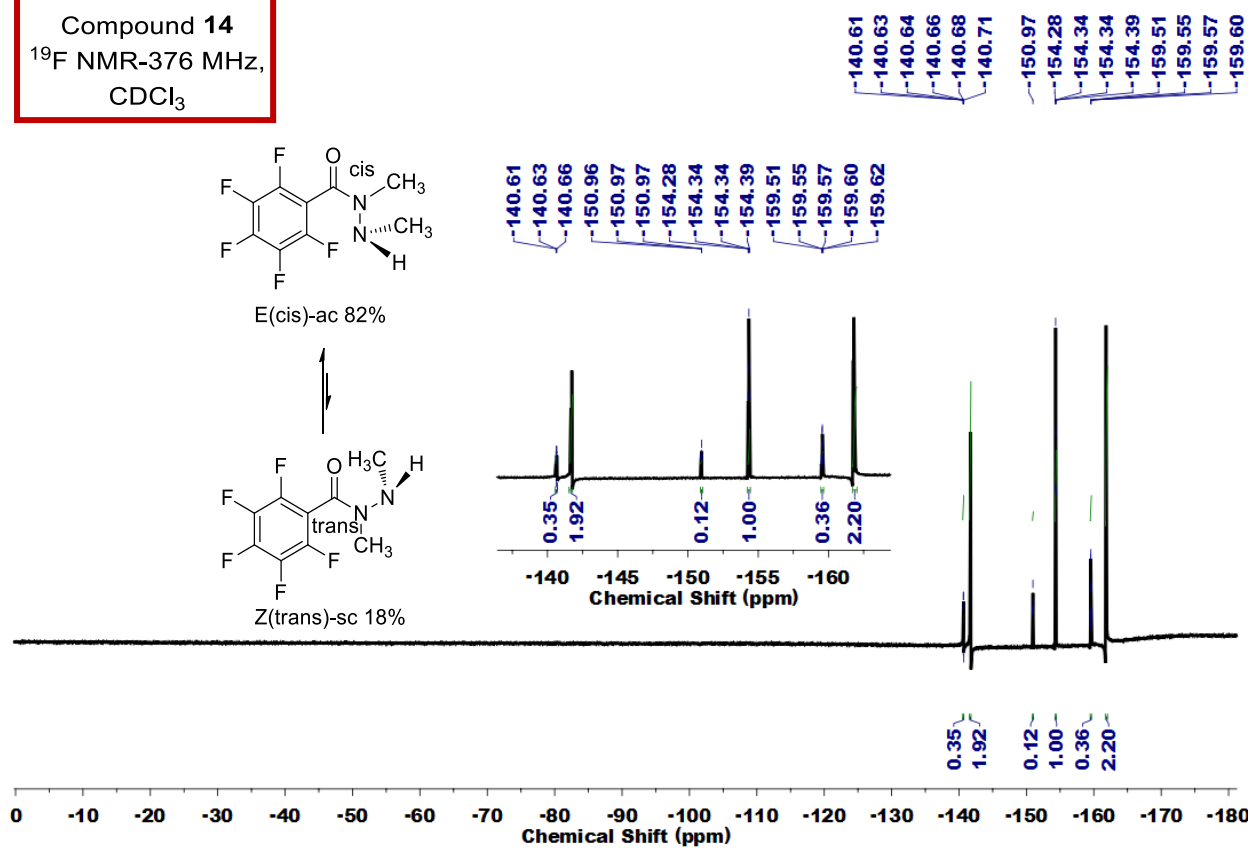

Compound 14  
 $^1\text{H}$  NMR-400 MHz,  
 $[\text{CD}_3]_2\text{SO}$

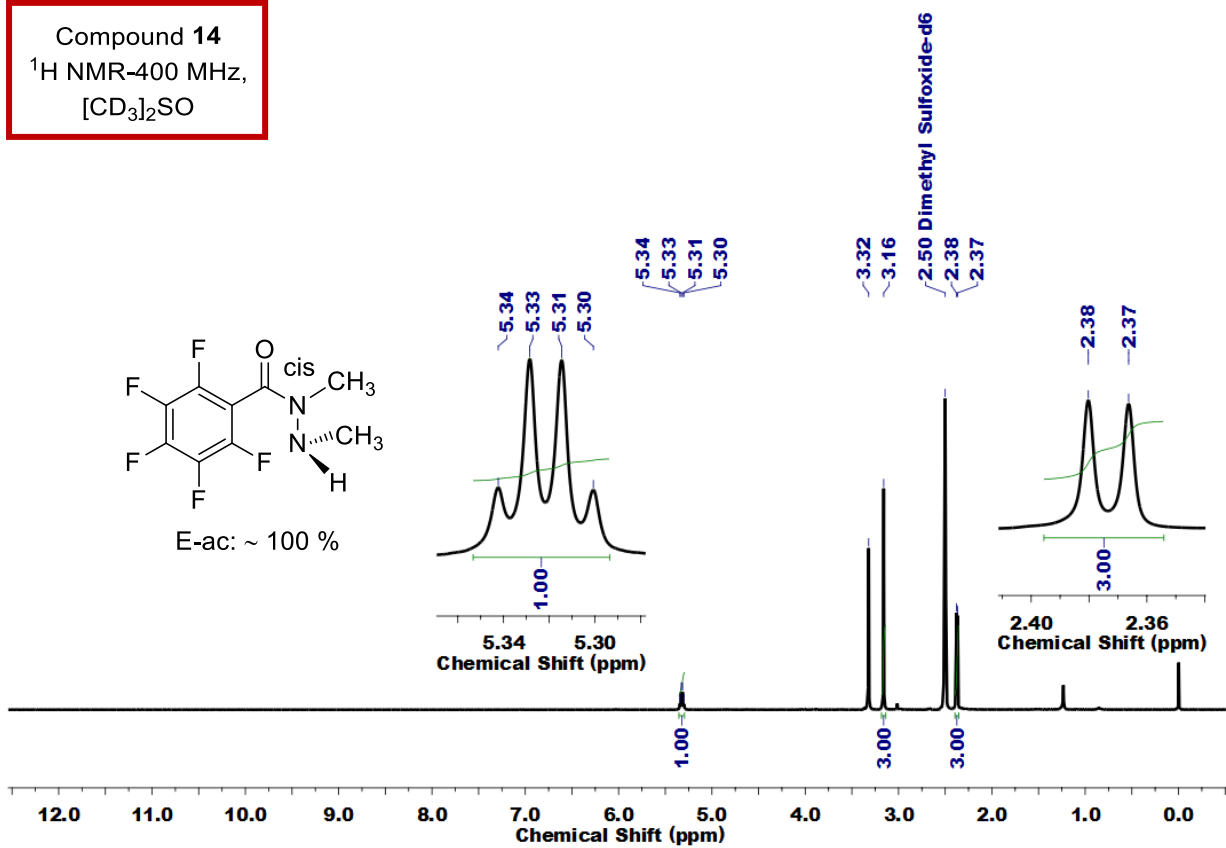

Compound 14  
 $^{19}\text{F}$  NMR-376 MHz,  
 $[\text{CD}_3]_2\text{SO}$

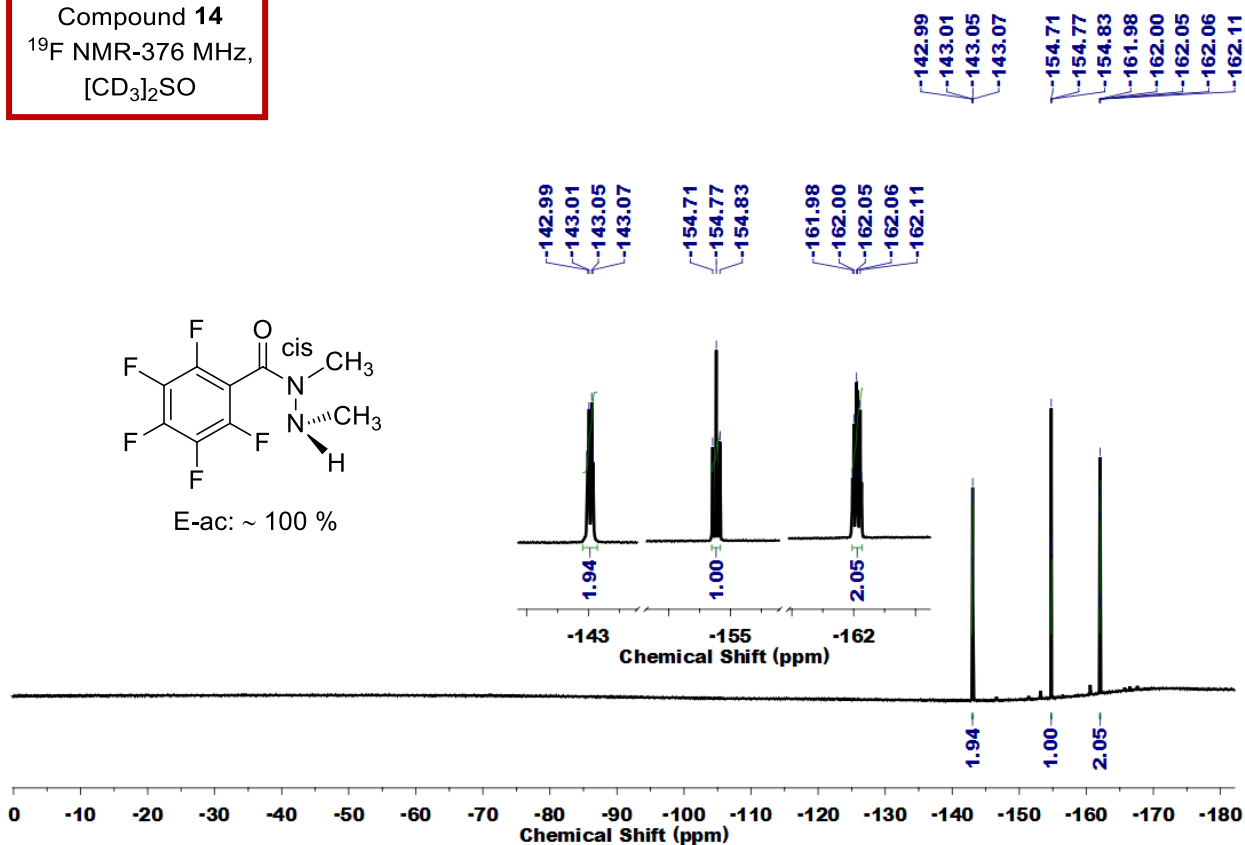

Compound 14  
 $^1\text{H}$  NMR-400 MHz,  
 $\text{CD}_3\text{OD}$

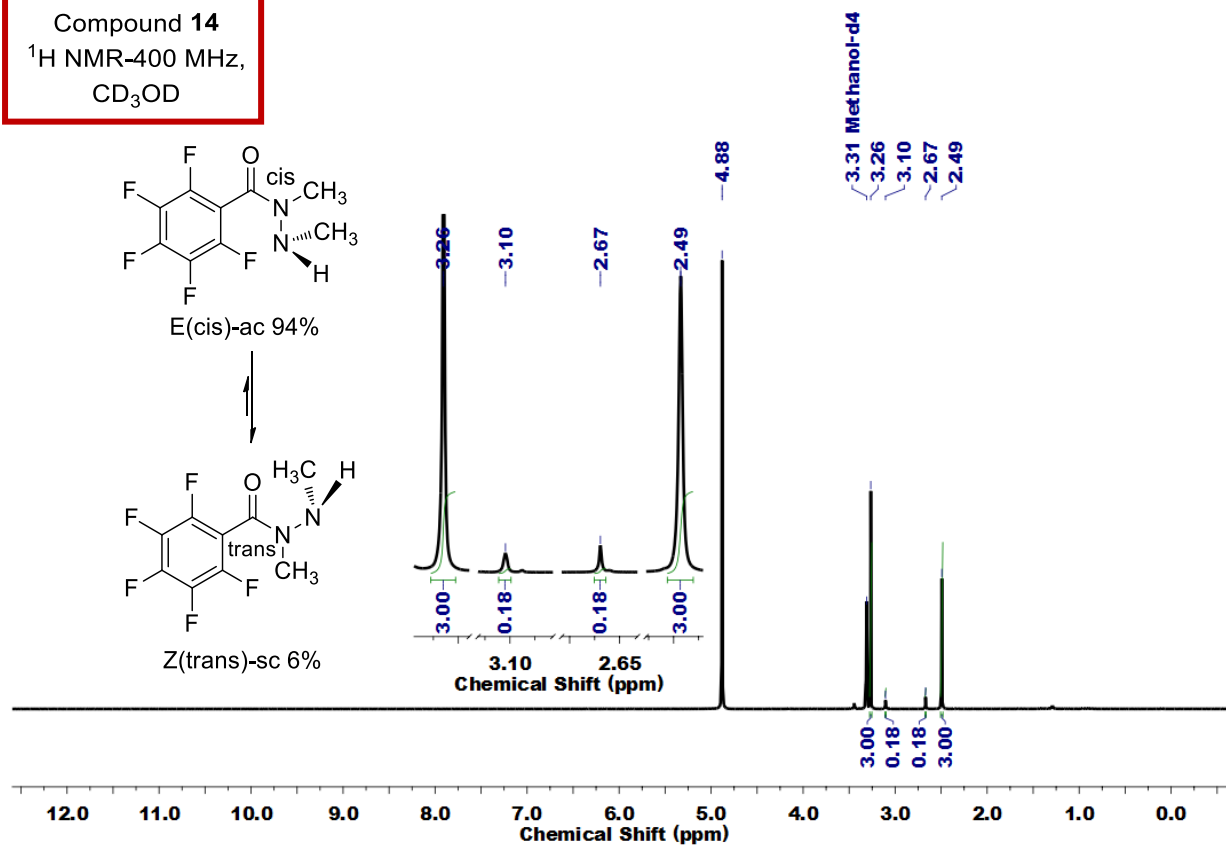

Compound 14  
<sup>19</sup>F NMR-376 MHz,  
 CD<sub>3</sub>OD

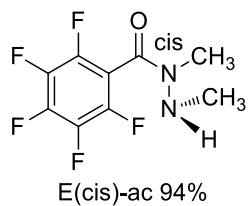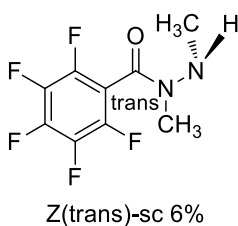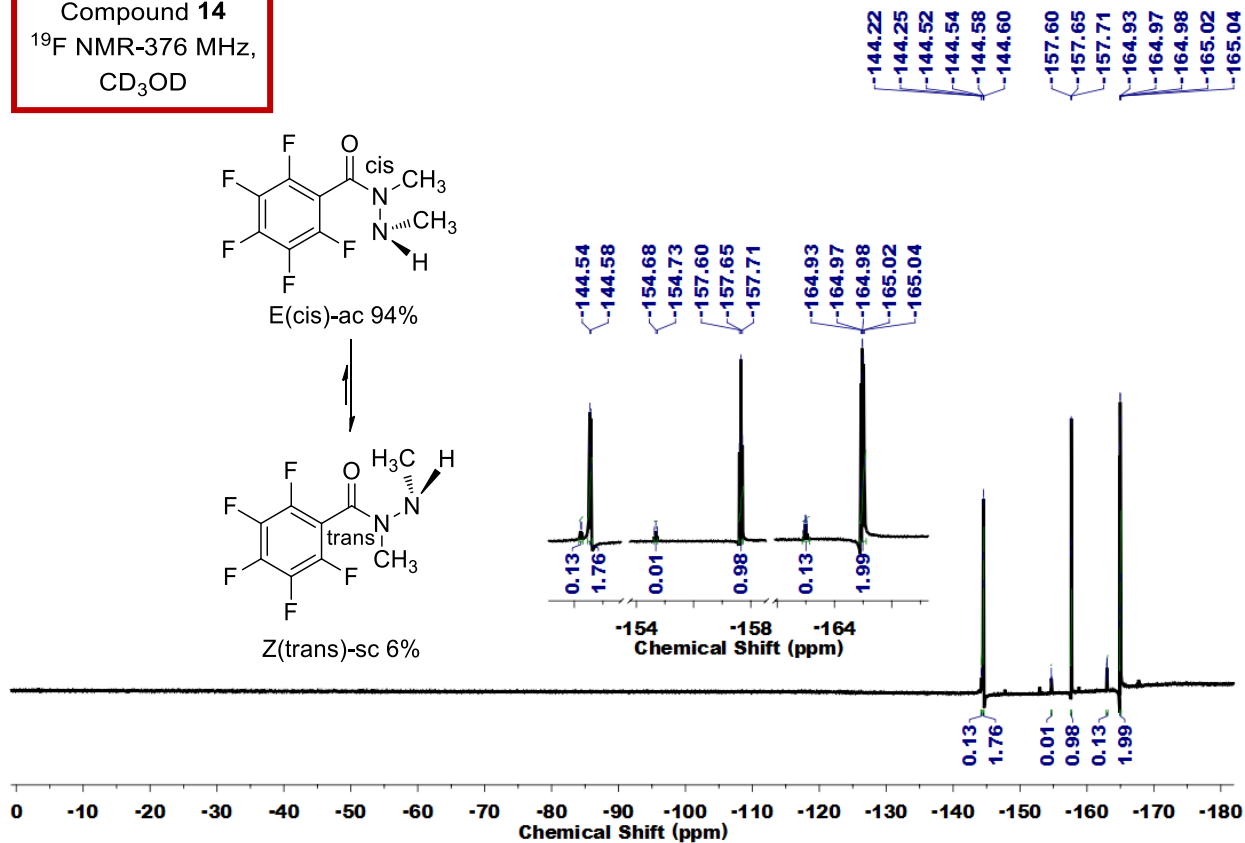

Compound 14  
<sup>1</sup>H NMR-400 MHz,  
 CD<sub>3</sub>CN

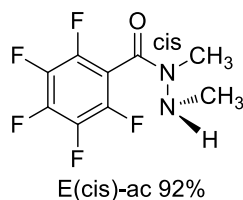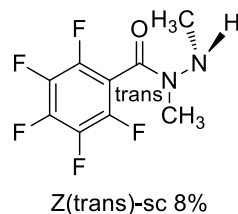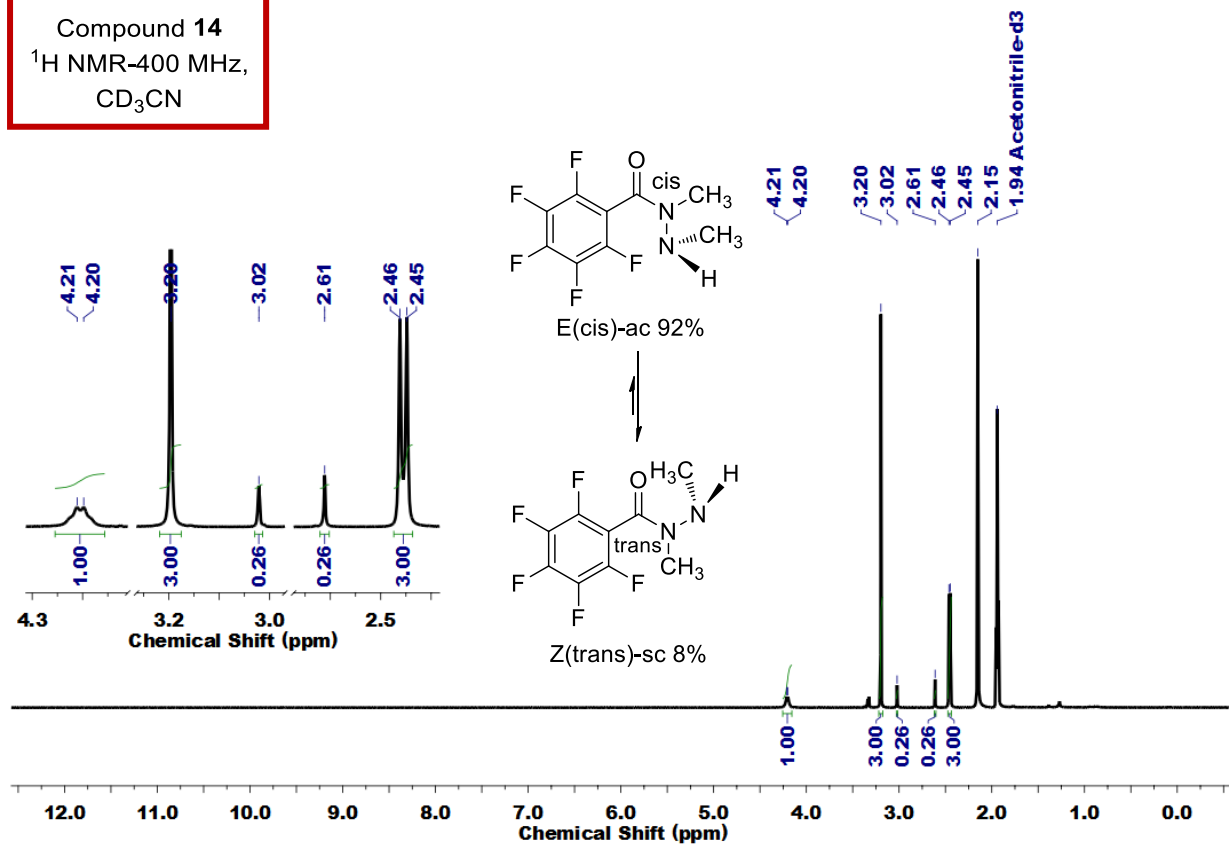

Compound 14  
 $^{19}\text{F}$  NMR-376 MHz,  
 $\text{CD}_3\text{CN}$

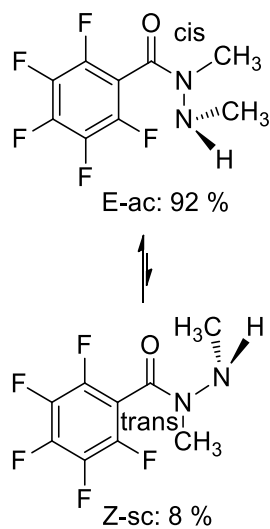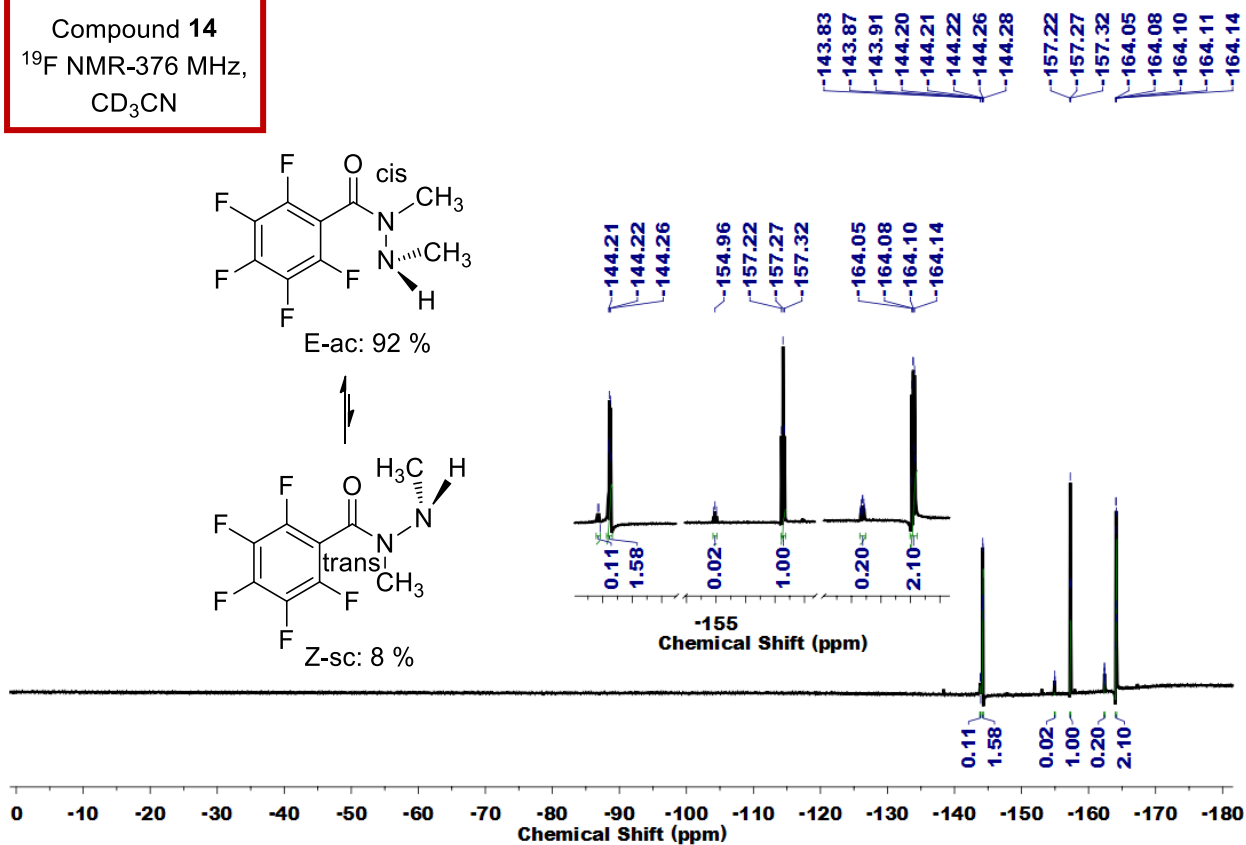

Compound 14  
 $^1\text{H}$  NMR-400 MHz,  
 $\text{D}_2\text{O}$

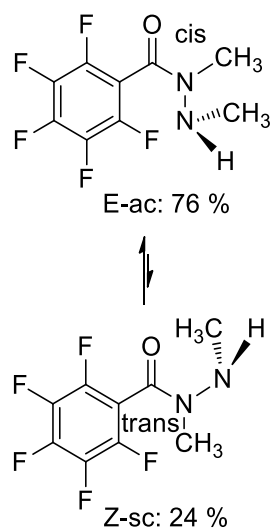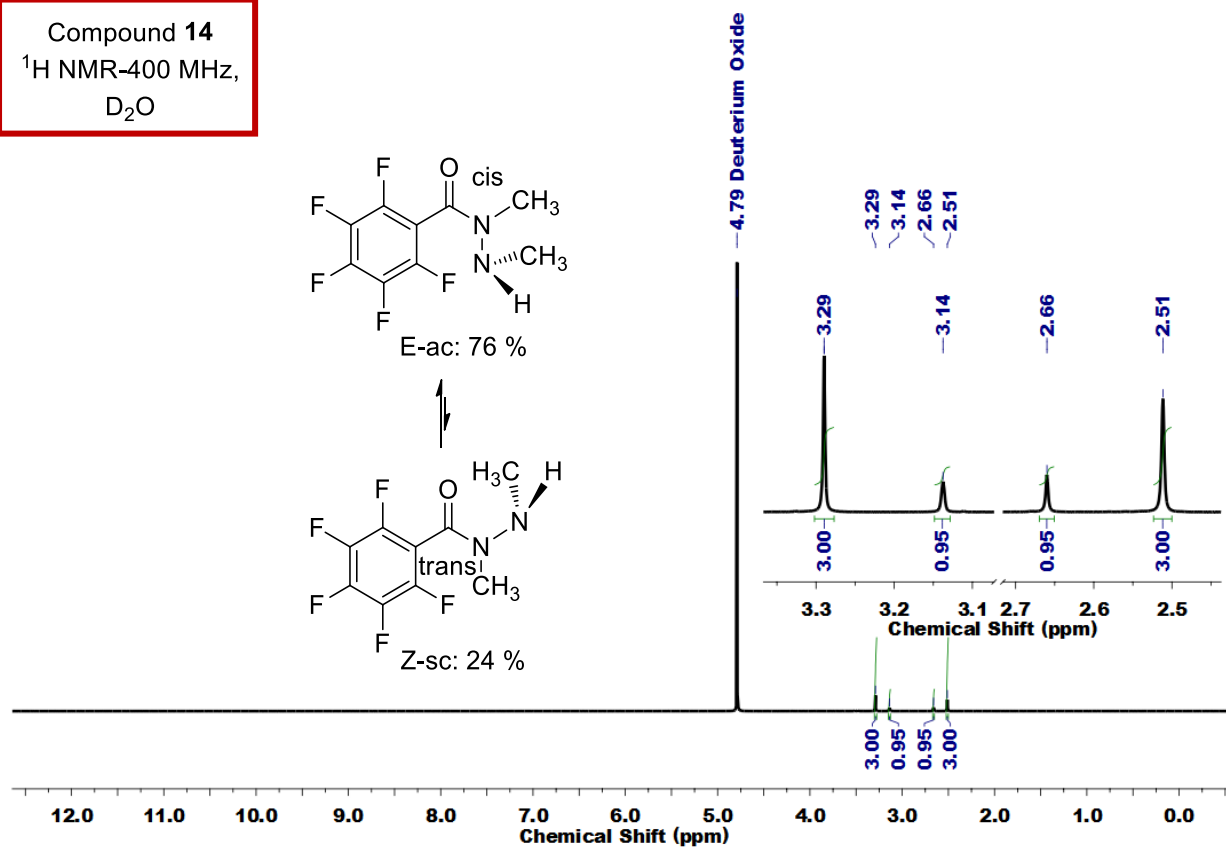

Compound 14  
<sup>19</sup>F NMR-376 MHz,  
D<sub>2</sub>O

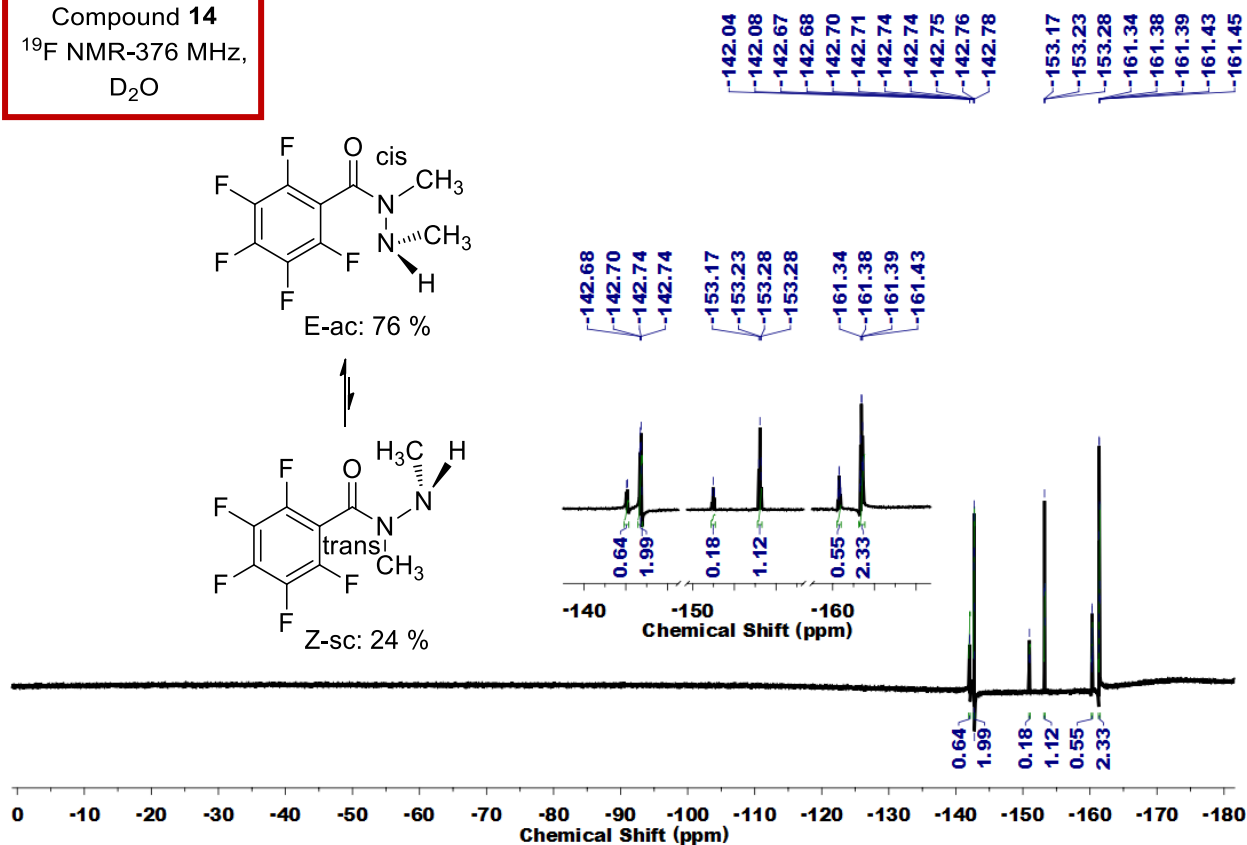

Compound 15  
<sup>1</sup>H NMR-400 MHz,  
CDCl<sub>3</sub>

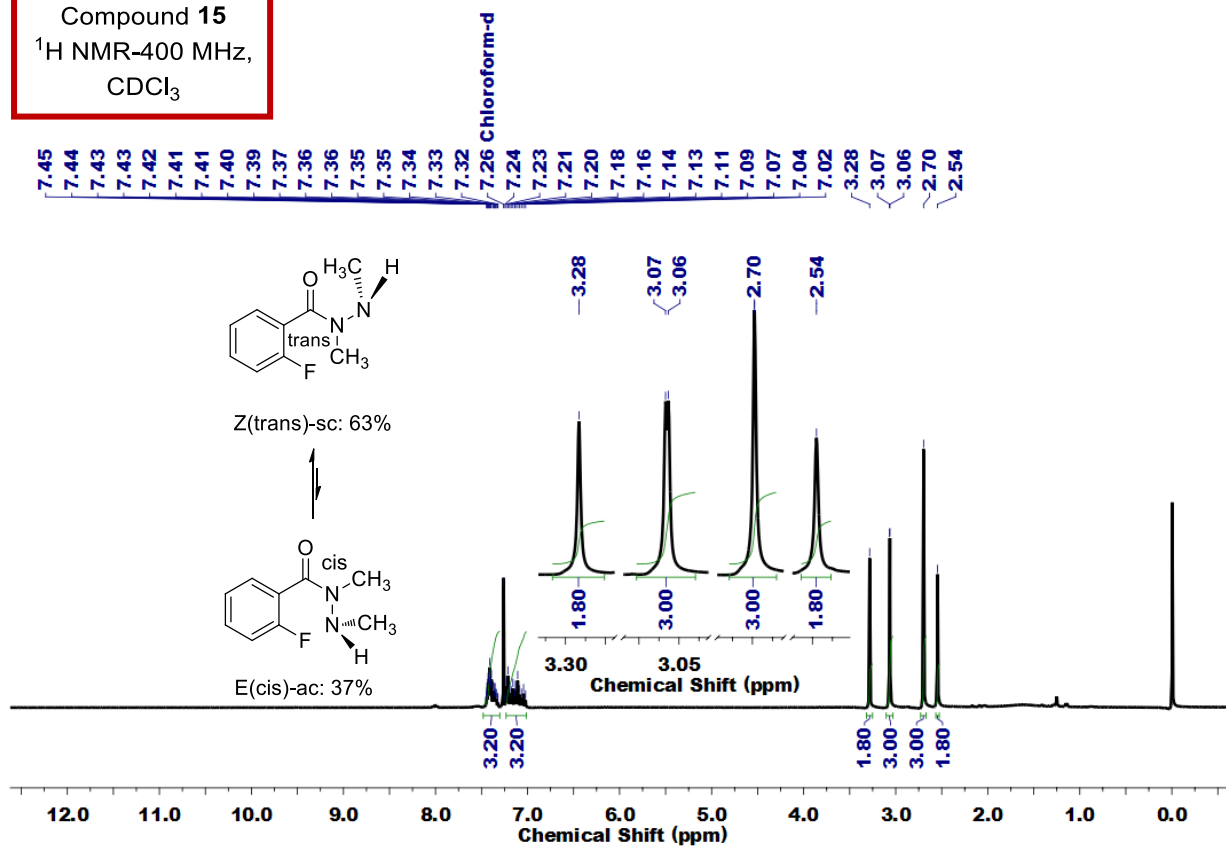

Compound 15  
<sup>19</sup>F NMR-376 MHz,  
 CDCl<sub>3</sub>

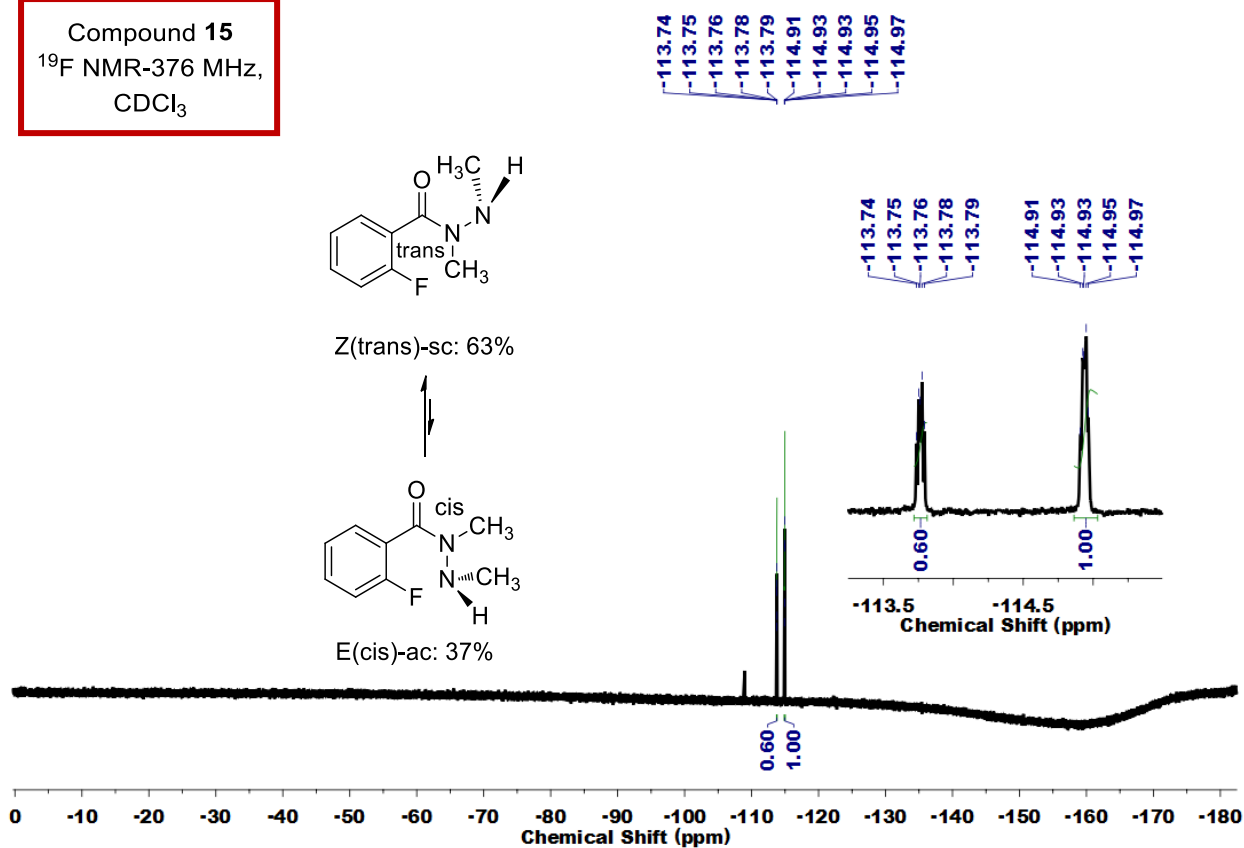

Compound 15  
<sup>13</sup>C NMR-100 MHz,  
 CDCl<sub>3</sub>

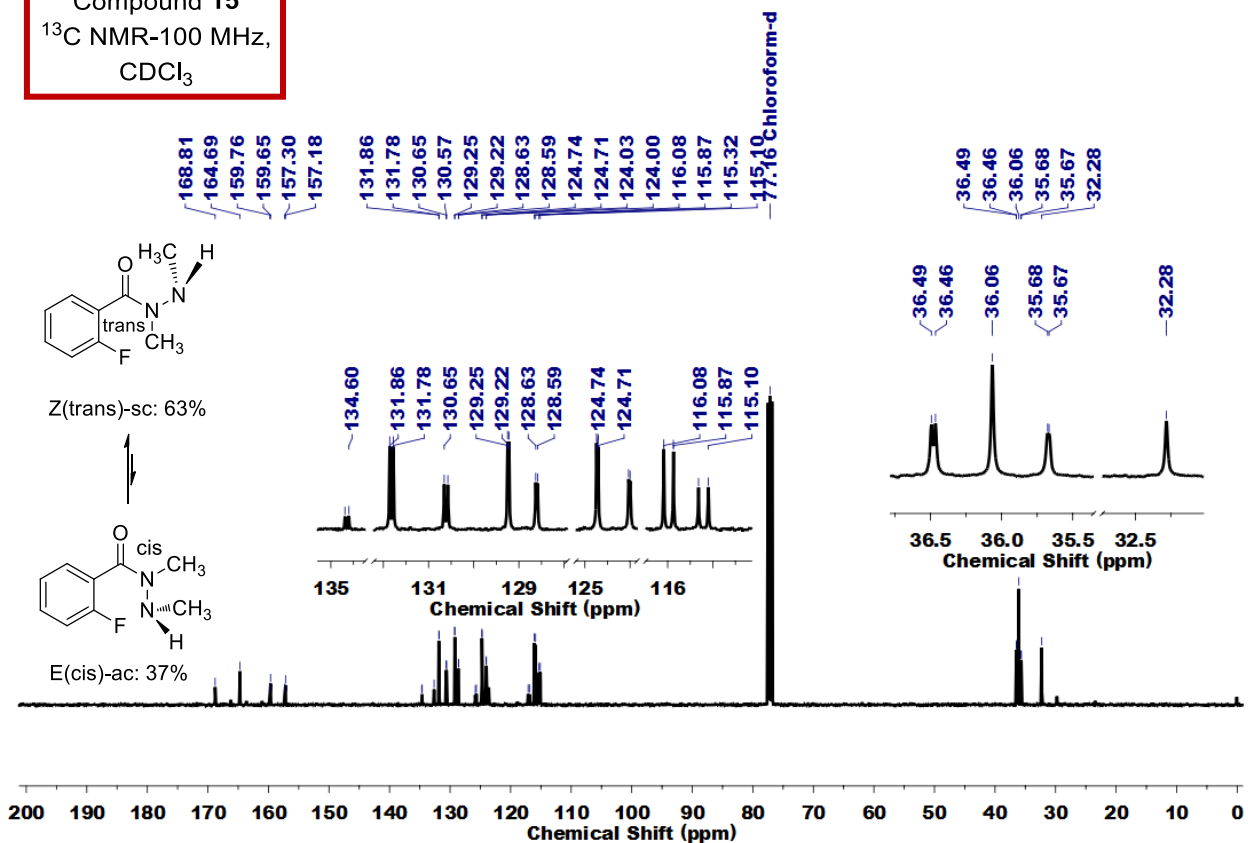

Compound 15  
<sup>1</sup>H NMR-400 MHz,  
 [CD<sub>3</sub>]<sub>2</sub>SO

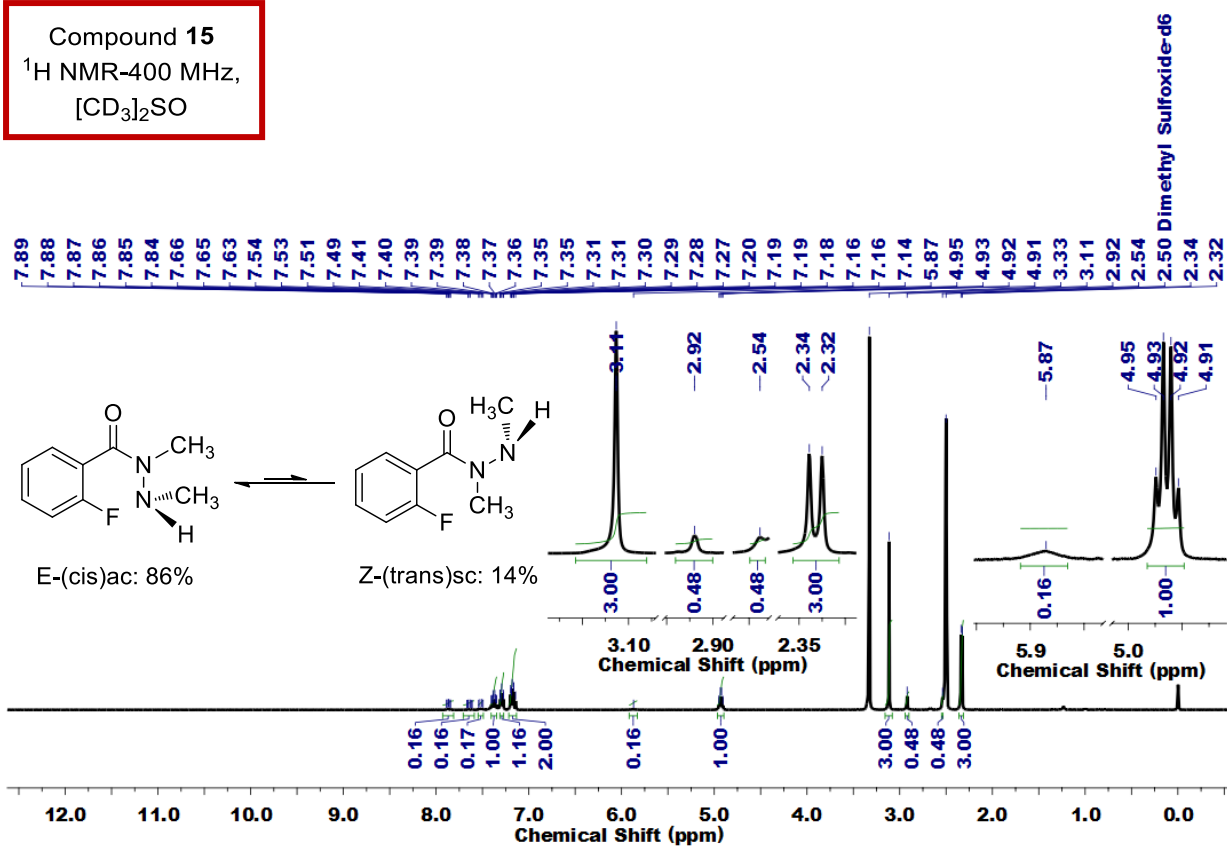

Compound 15  
<sup>19</sup>F NMR-376 MHz,  
 [CD<sub>3</sub>]<sub>2</sub>SO

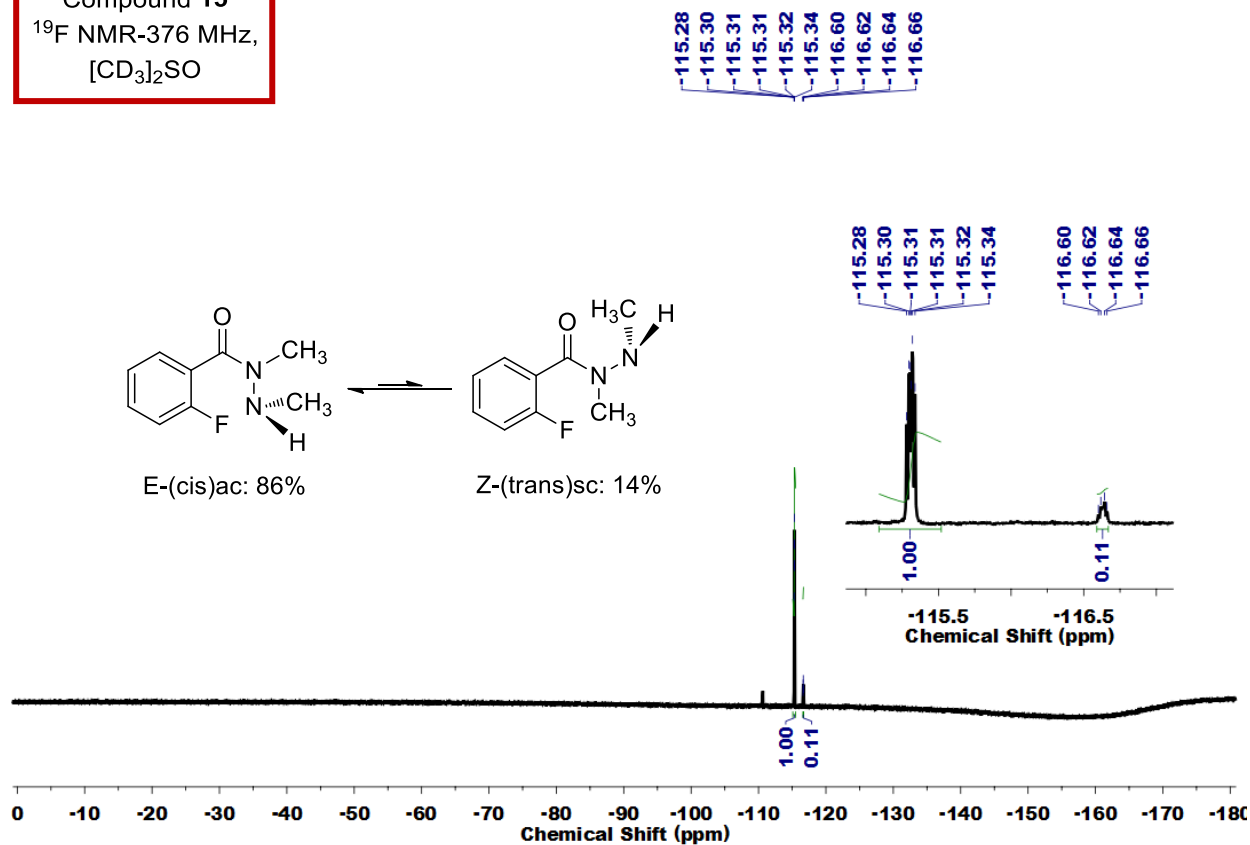



Compound 17  
<sup>1</sup>H NMR-400 MHz,  
CDCl<sub>3</sub>

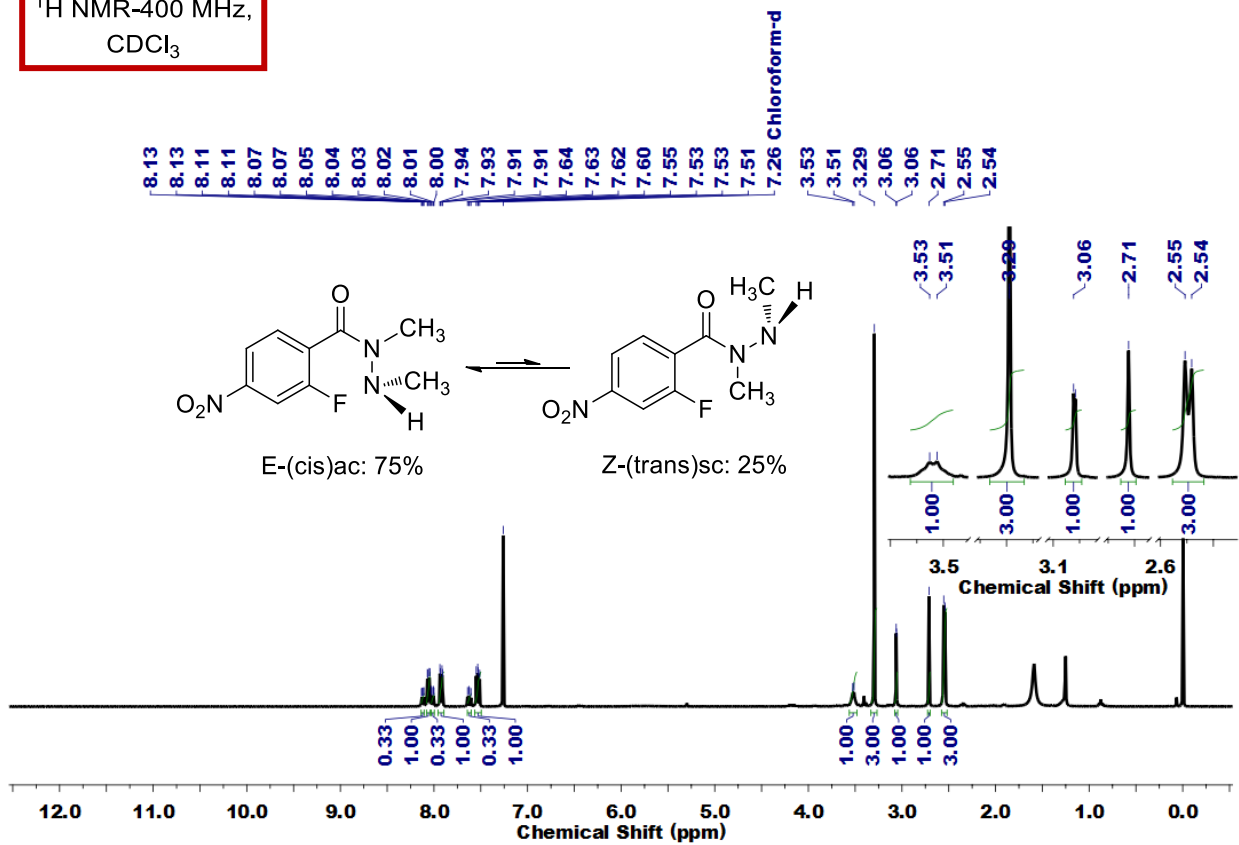

Compound 17  
<sup>19</sup>F NMR-376 MHz,  
 CDCl<sub>3</sub>

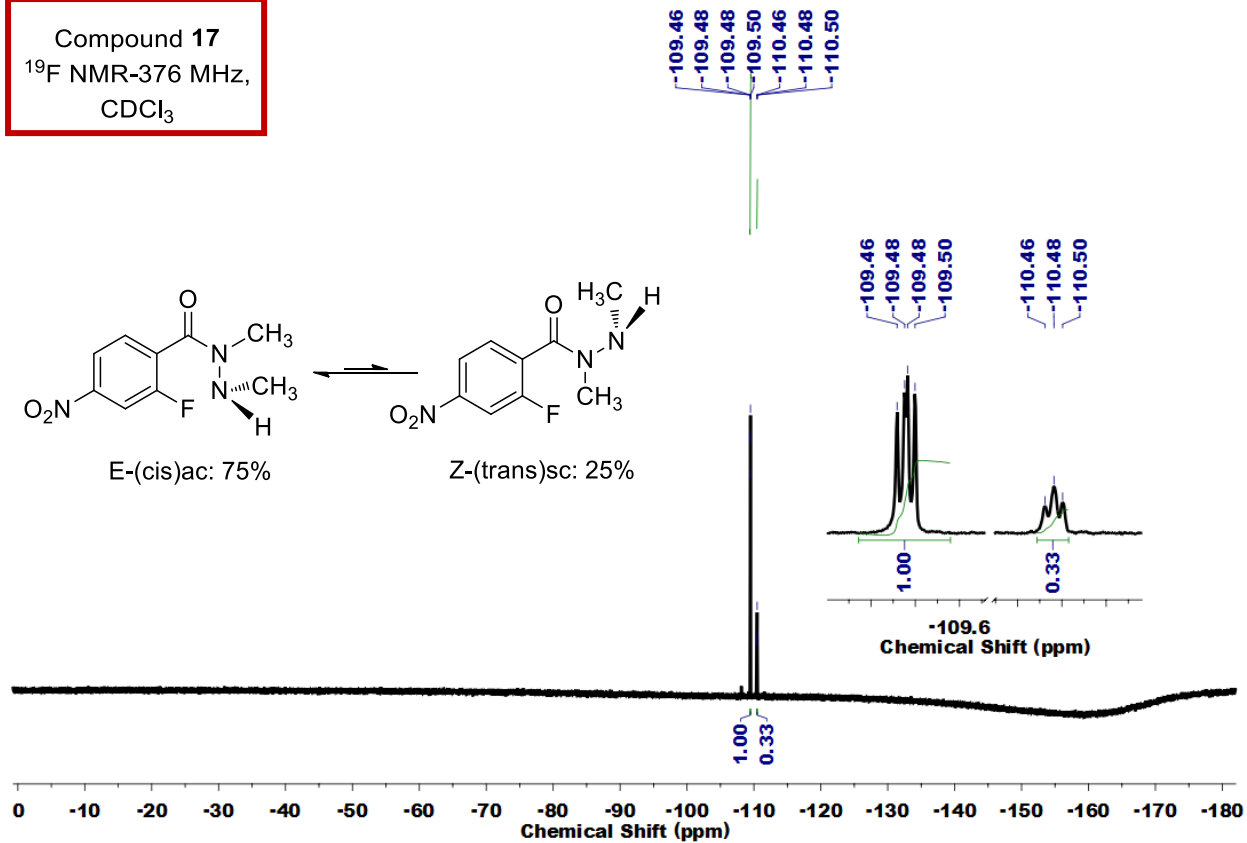

Compound 17  
<sup>13</sup>C NMR-100 MHz,  
 CDCl<sub>3</sub>

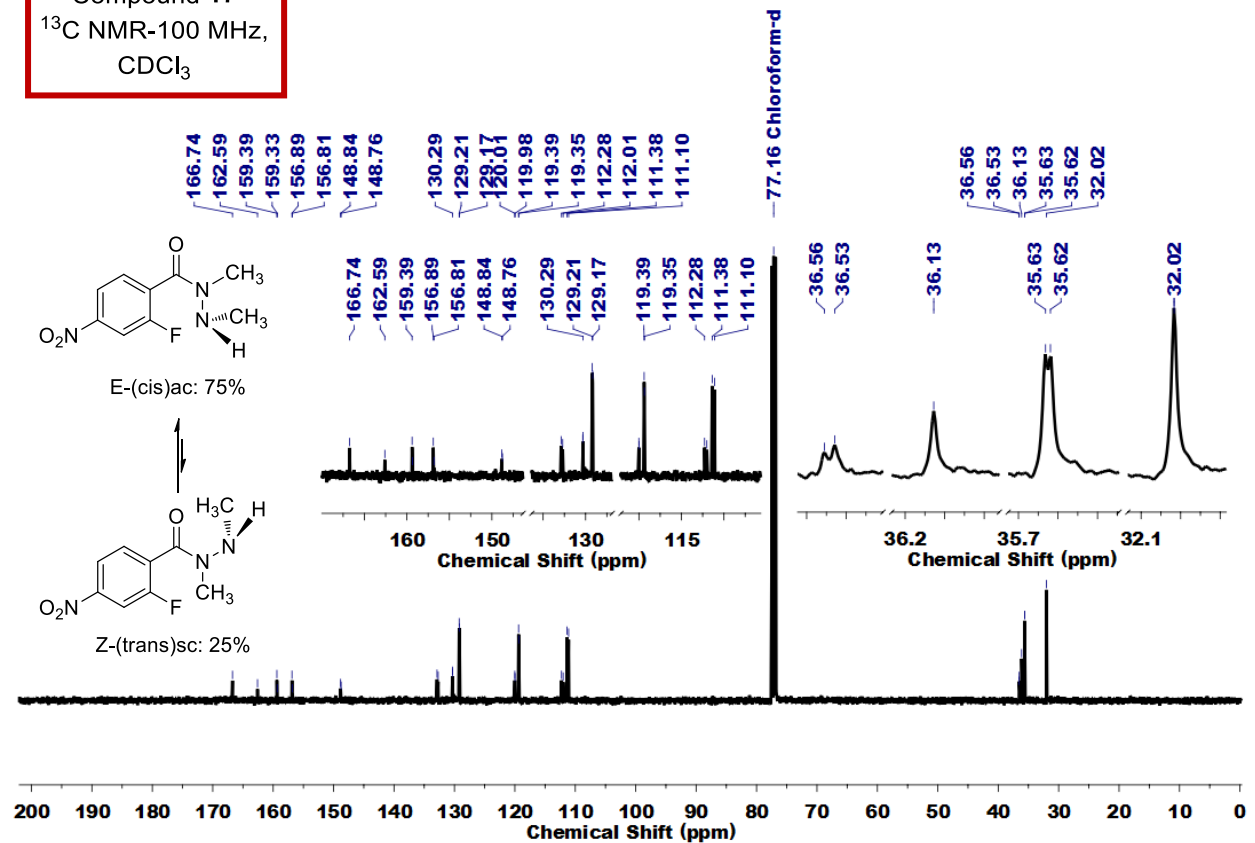

Compound 17  
 $^1\text{H}$  NMR-400 MHz,  
 $[\text{CD}_3]_2\text{SO}$

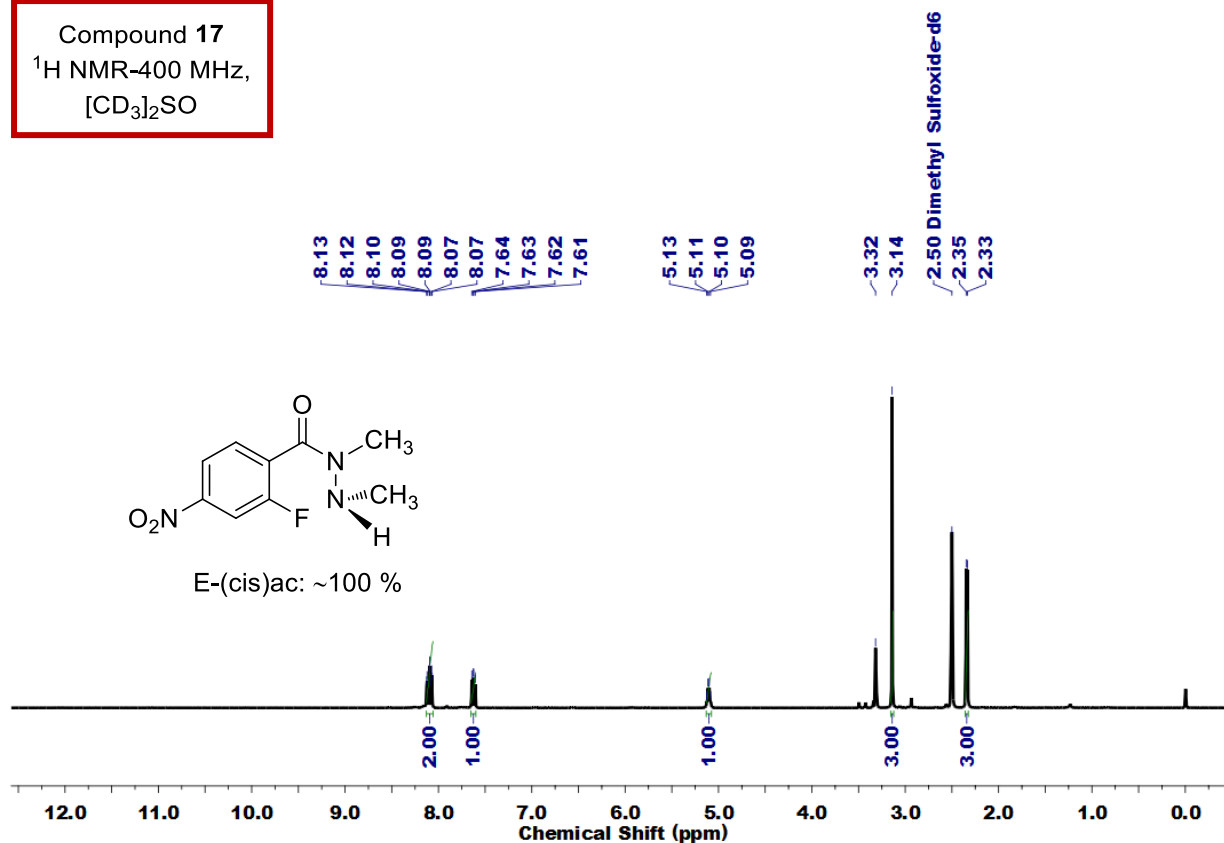

Compound 17  
 $^{19}\text{F}$  NMR-376 MHz,  
 $[\text{CD}_3]_2\text{SO}$

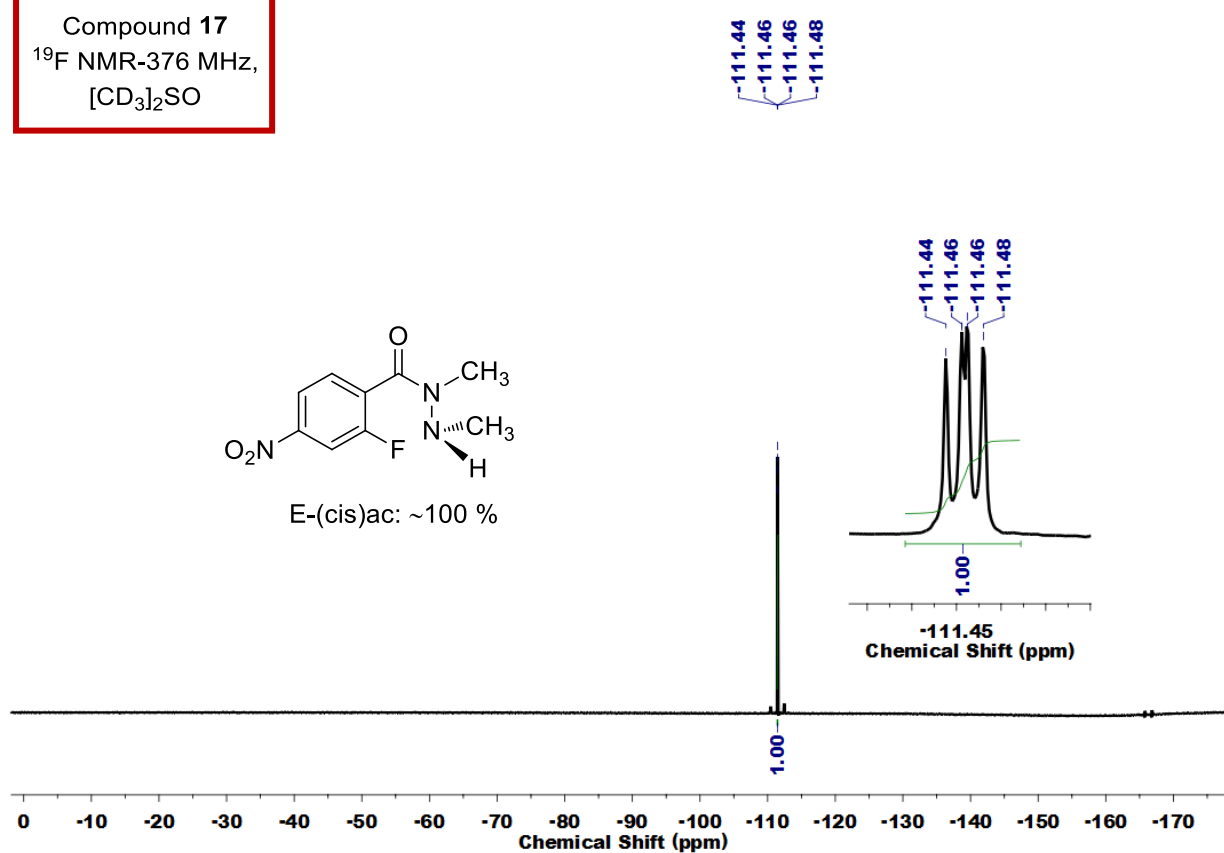

Compound 18  
<sup>1</sup>H NMR-400 MHz,  
 CDCl<sub>3</sub>

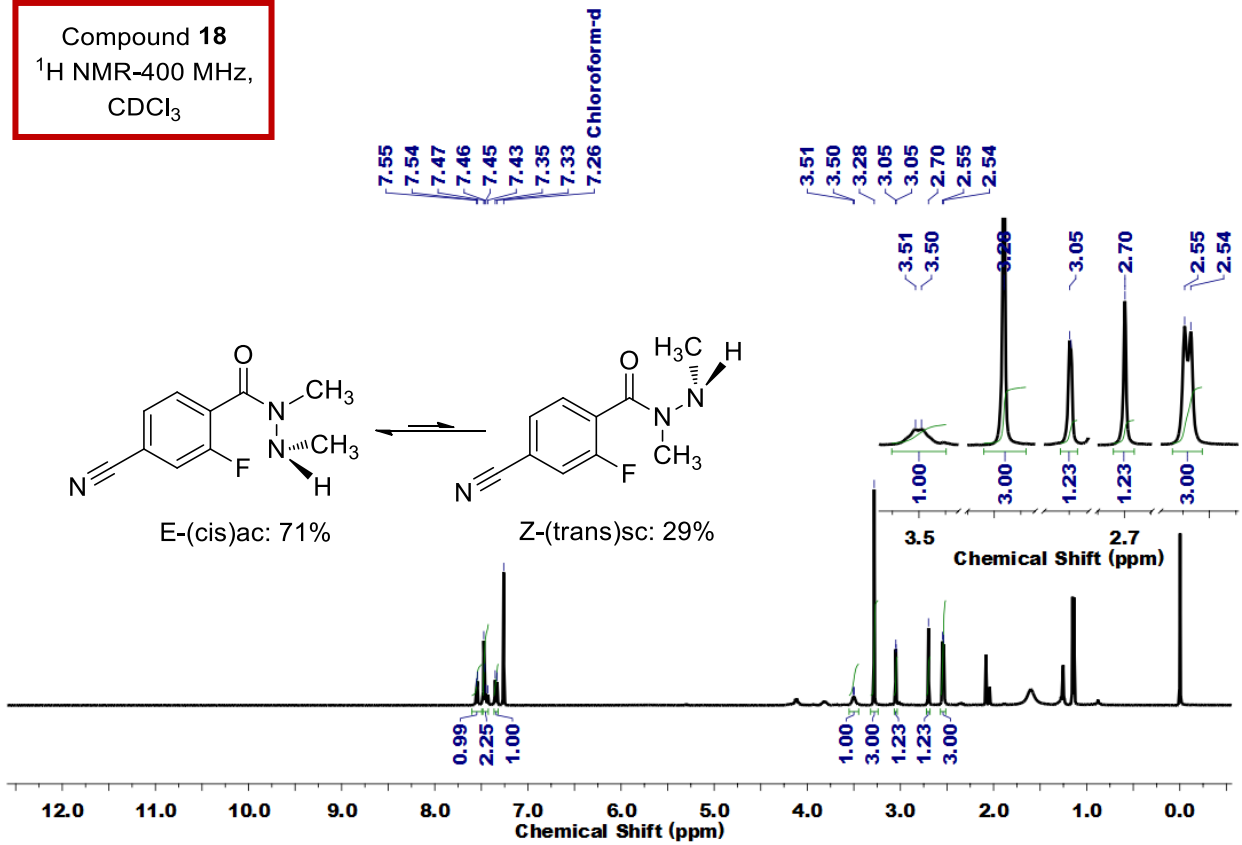

Compound 18  
<sup>13</sup>C NMR-100 MHz,  
 CDCl<sub>3</sub>

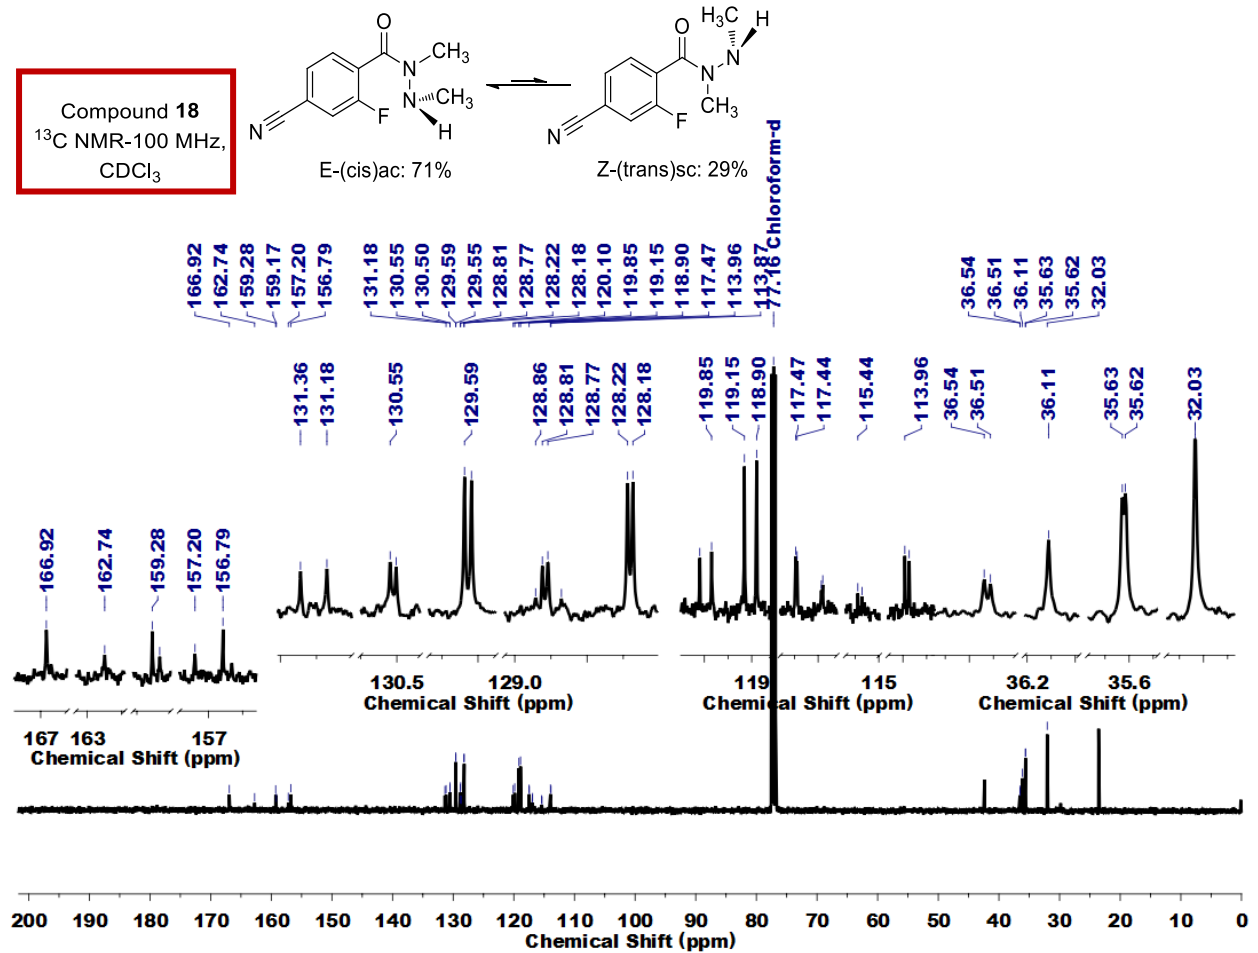

Compound 18  
 $^{19}\text{F}$  NMR-376 MHz,  
 $\text{CDCl}_3$

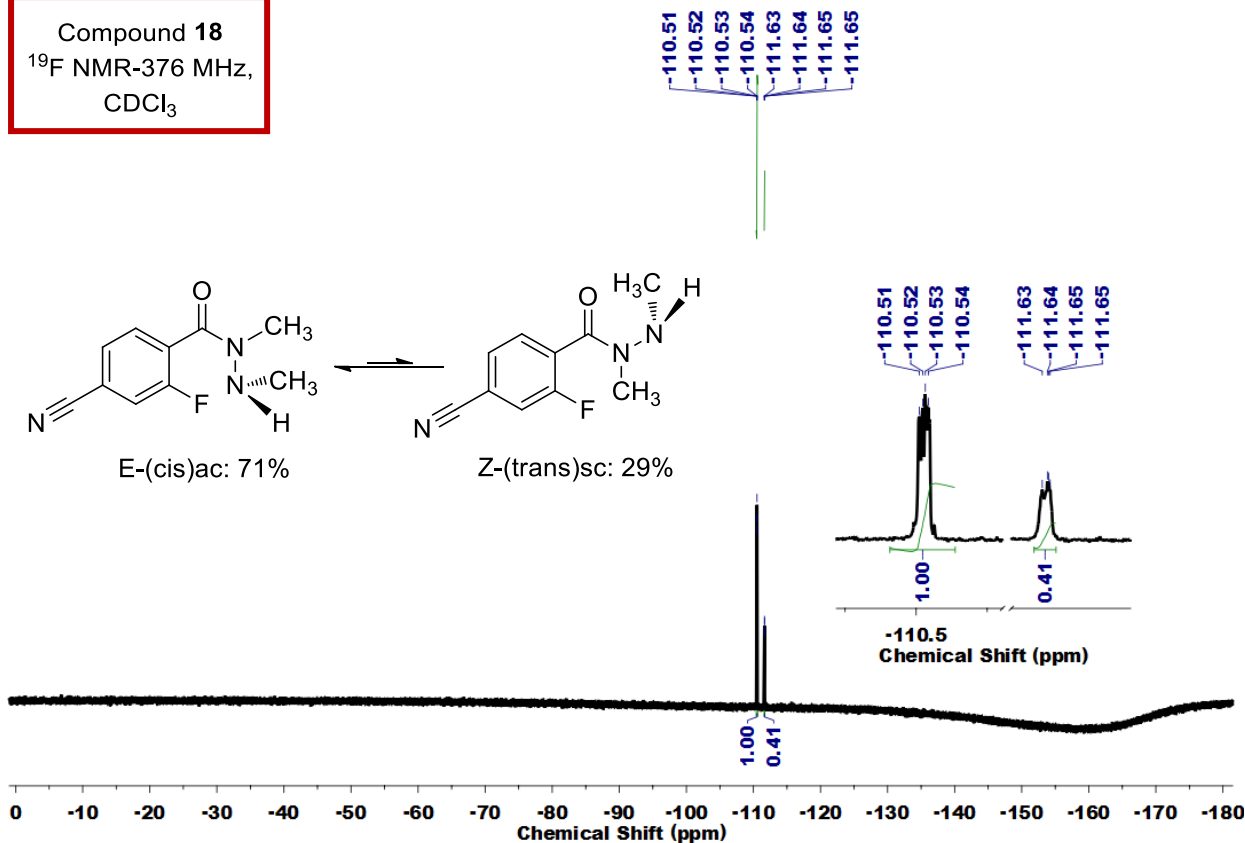

Compound 18  
 $^1\text{H}$  NMR-400 MHz,  
 $[\text{CD}_3]_2\text{SO}$

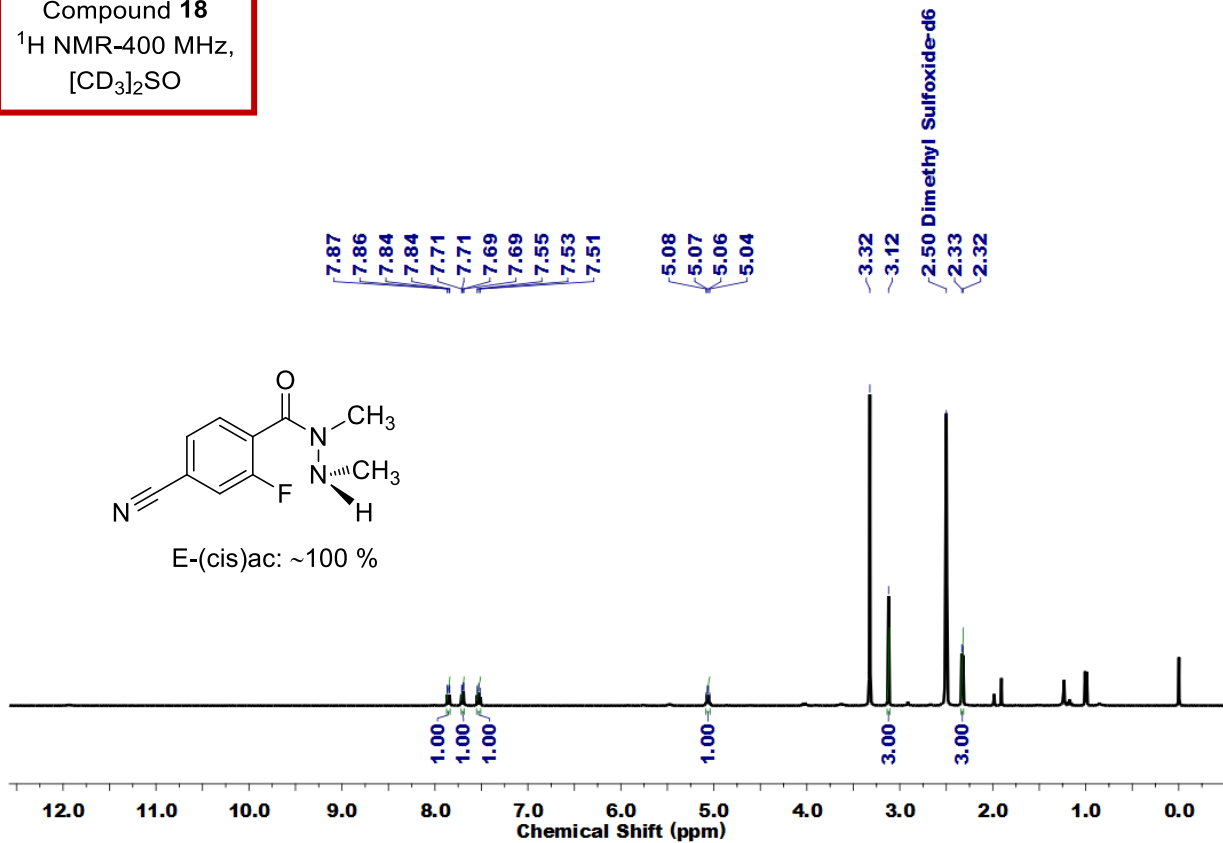

Compound 18  
 $^{19}\text{F}$  NMR-376 MHz,  
[CD<sub>3</sub>]<sub>2</sub>SO

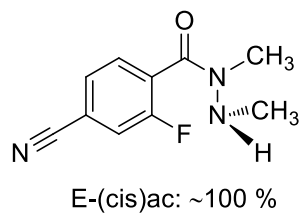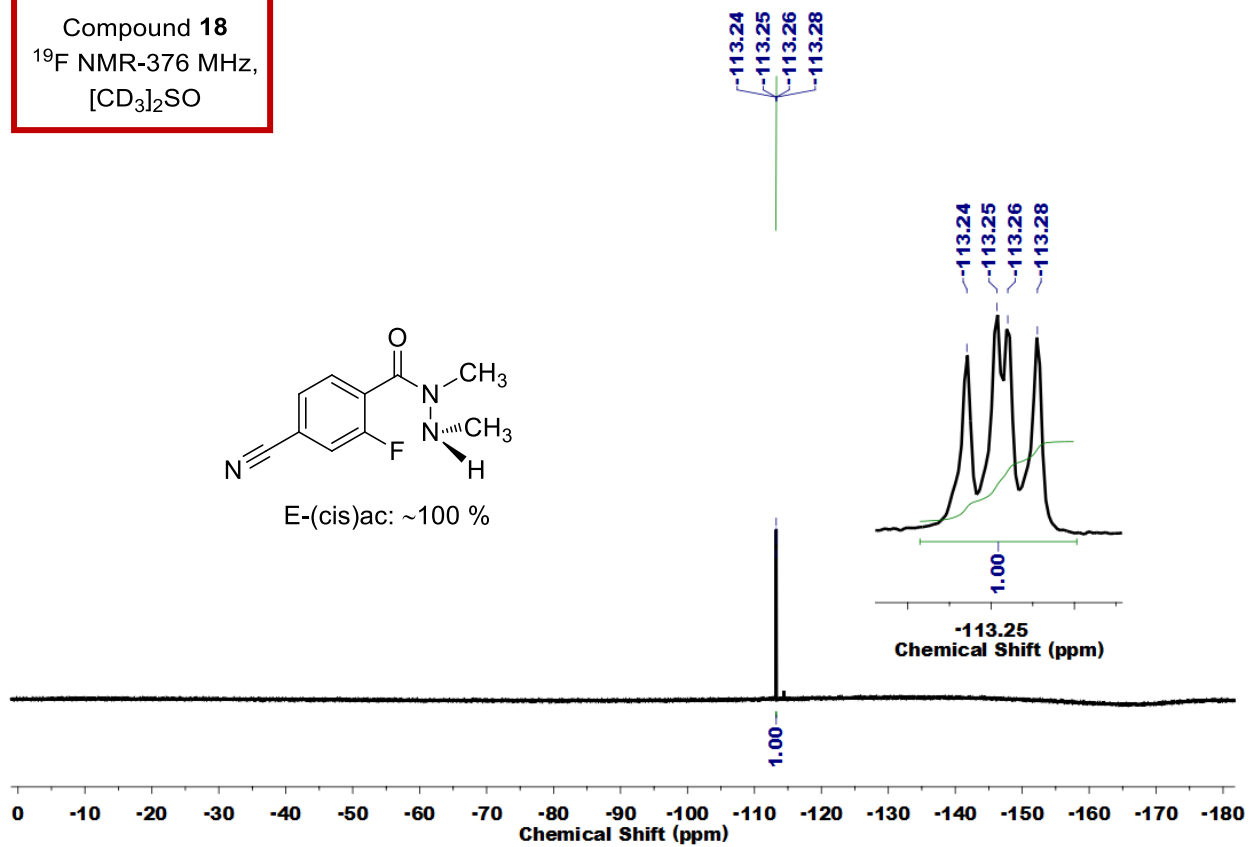

## Cyclic Compounds

Compound **14C**  
<sup>1</sup>H NMR-400 MHz,  
 CDCl<sub>3</sub>

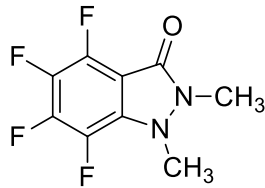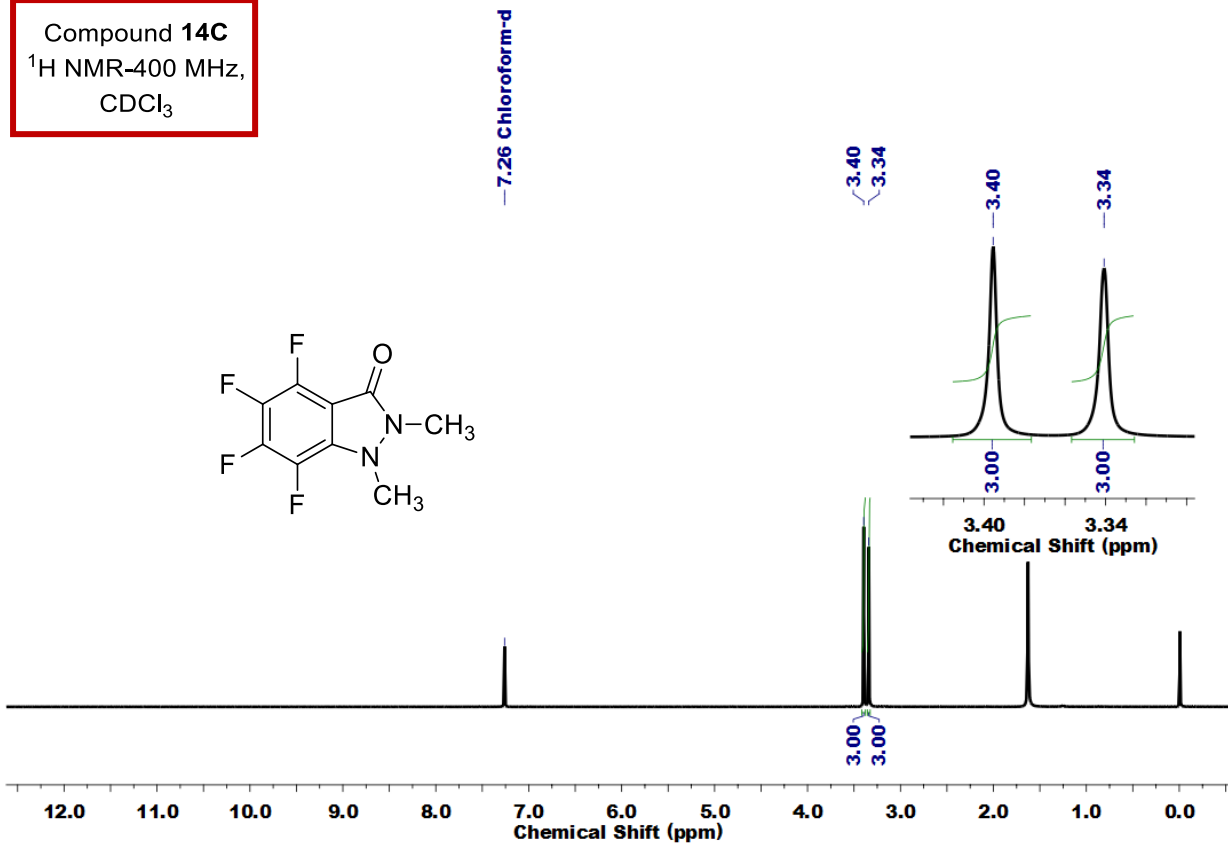

Compound **14C**  
<sup>13</sup>C NMR-100 MHz,  
 CDCl<sub>3</sub>

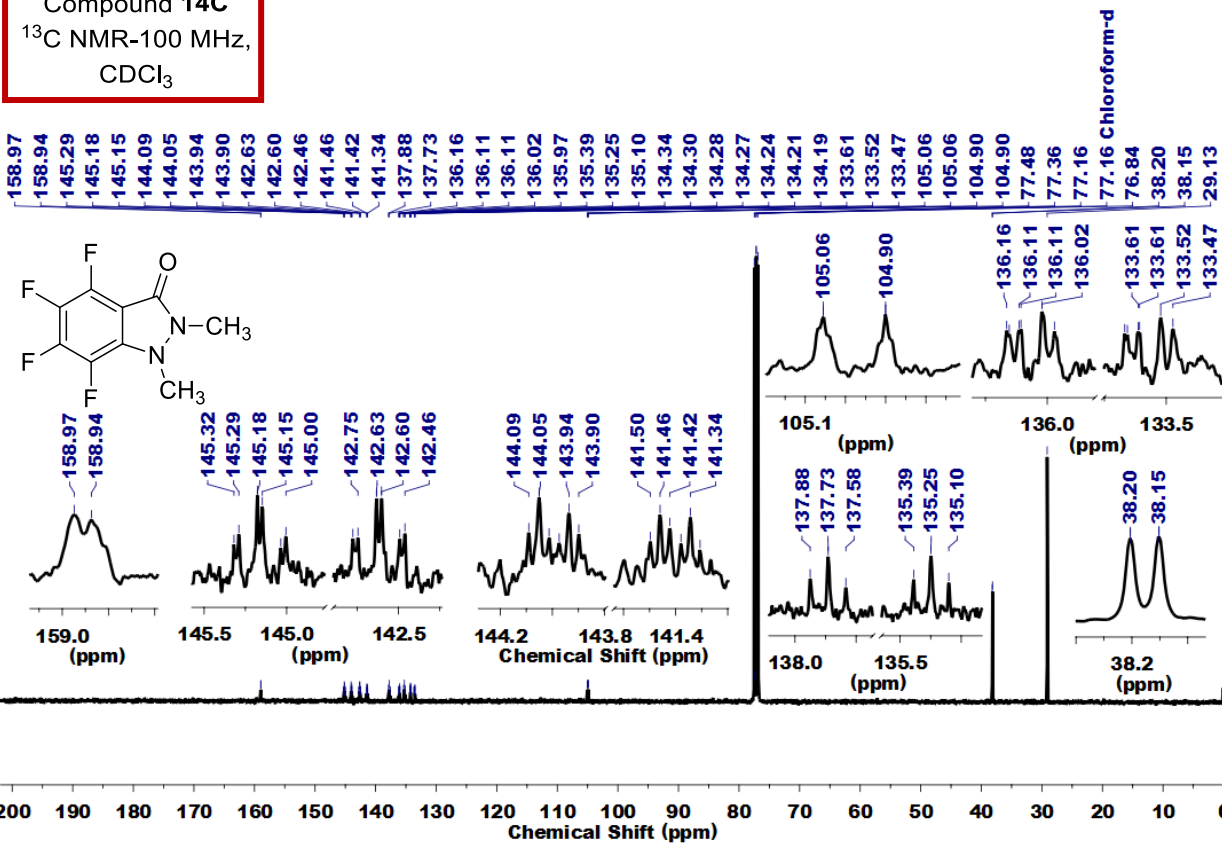

Compound **14C**  
 $^{19}\text{F}$  NMR-376 MHz,  
 $\text{CDCl}_3$

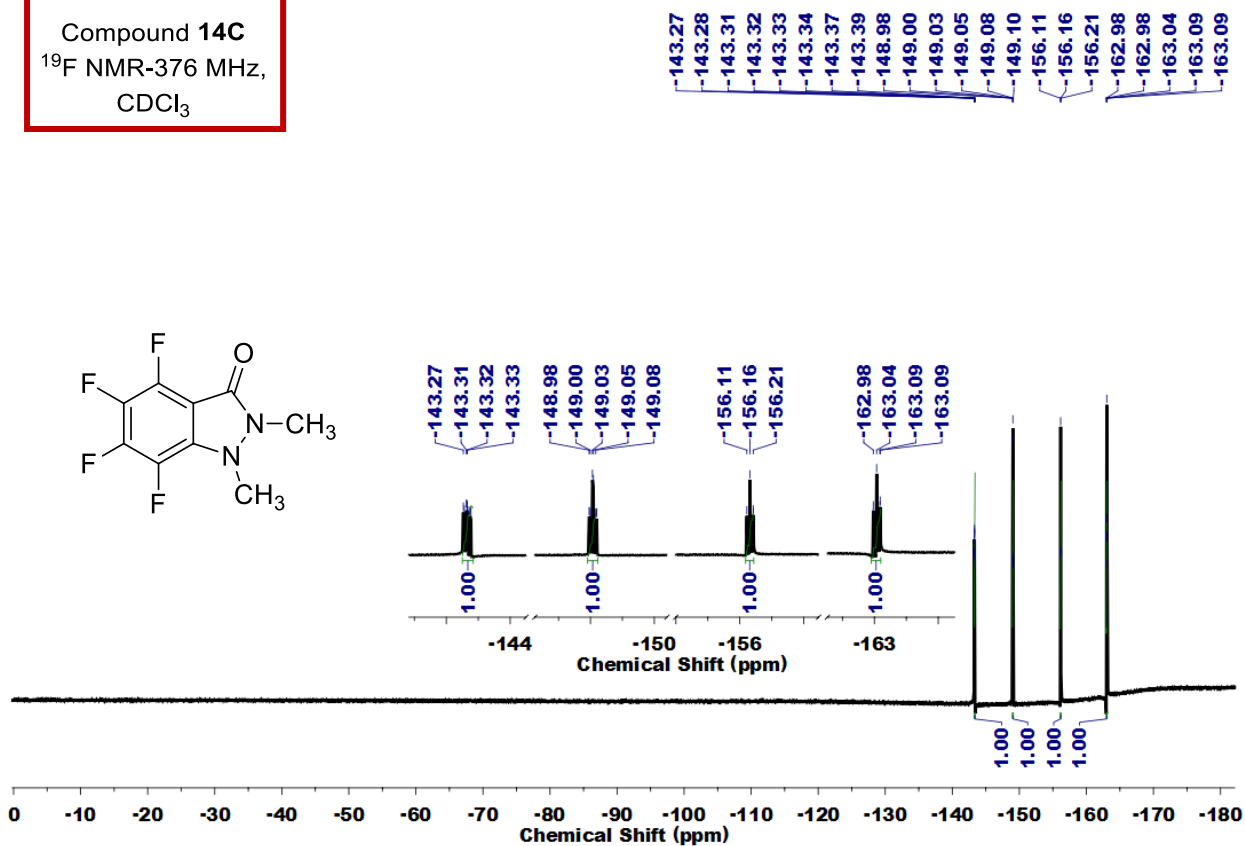

Compound **14C**  
 $^1\text{H}$  NMR-400 MHz,  
 $[\text{CD}_3]_2\text{SO}$

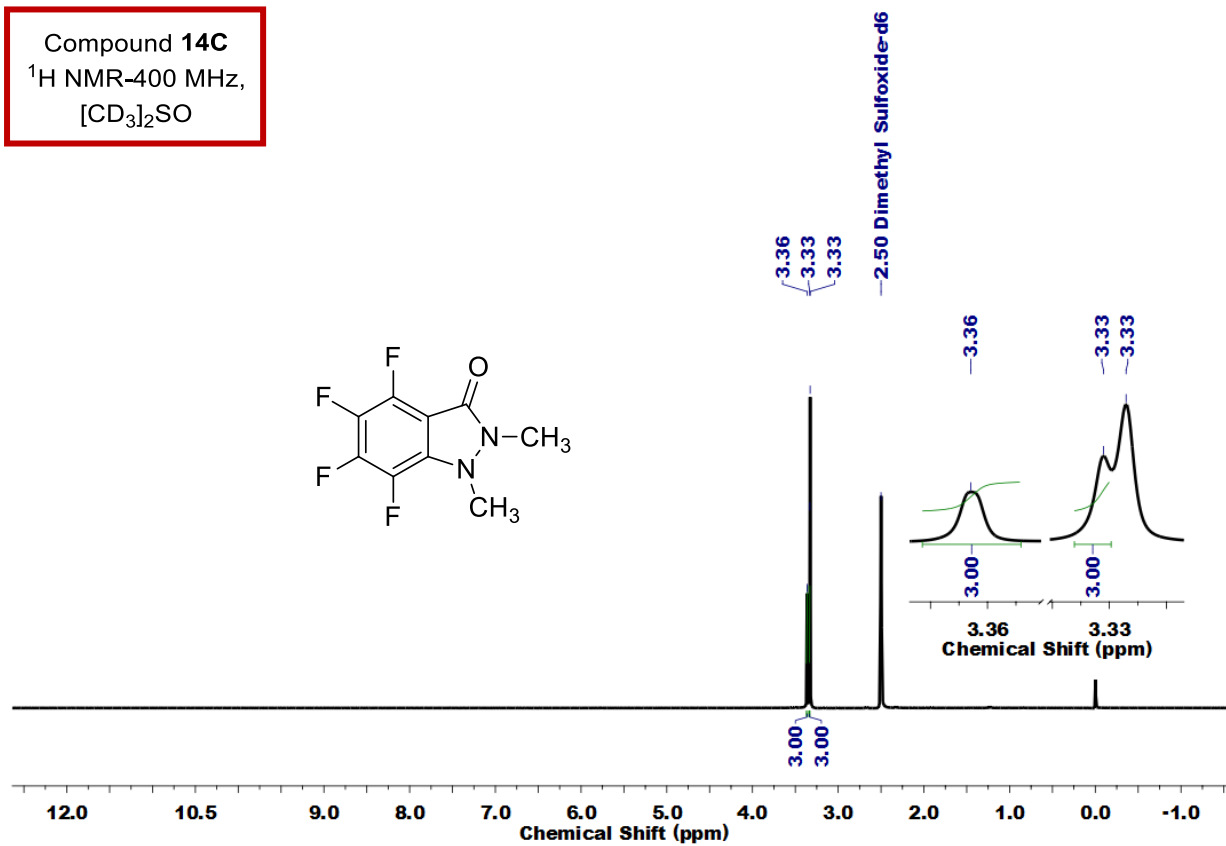



Compound **14C**  
<sup>19</sup>F NMR-376 MHz,  
 [CD<sub>3</sub>]<sub>2</sub>SO

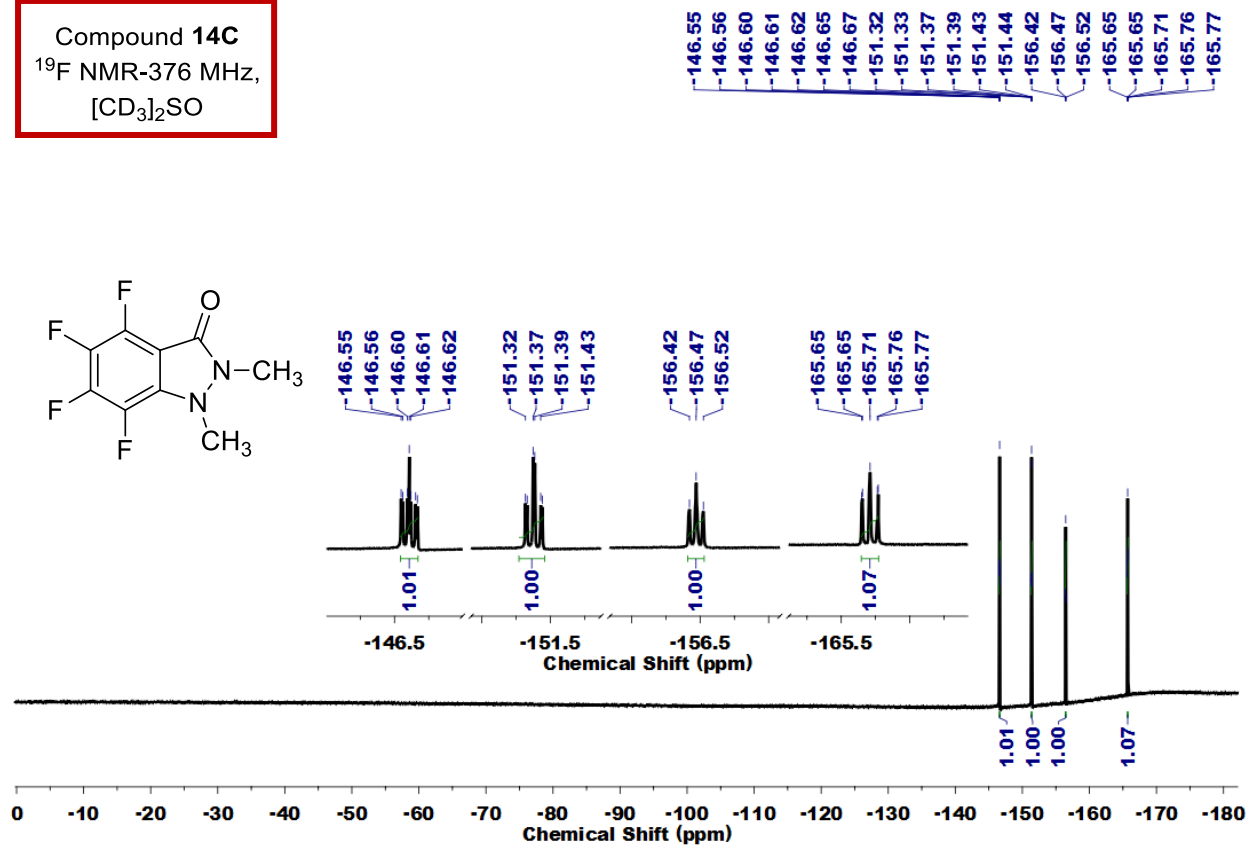

Compound **16C**  
<sup>1</sup>H NMR-400 MHz,  
 CDCl<sub>3</sub>

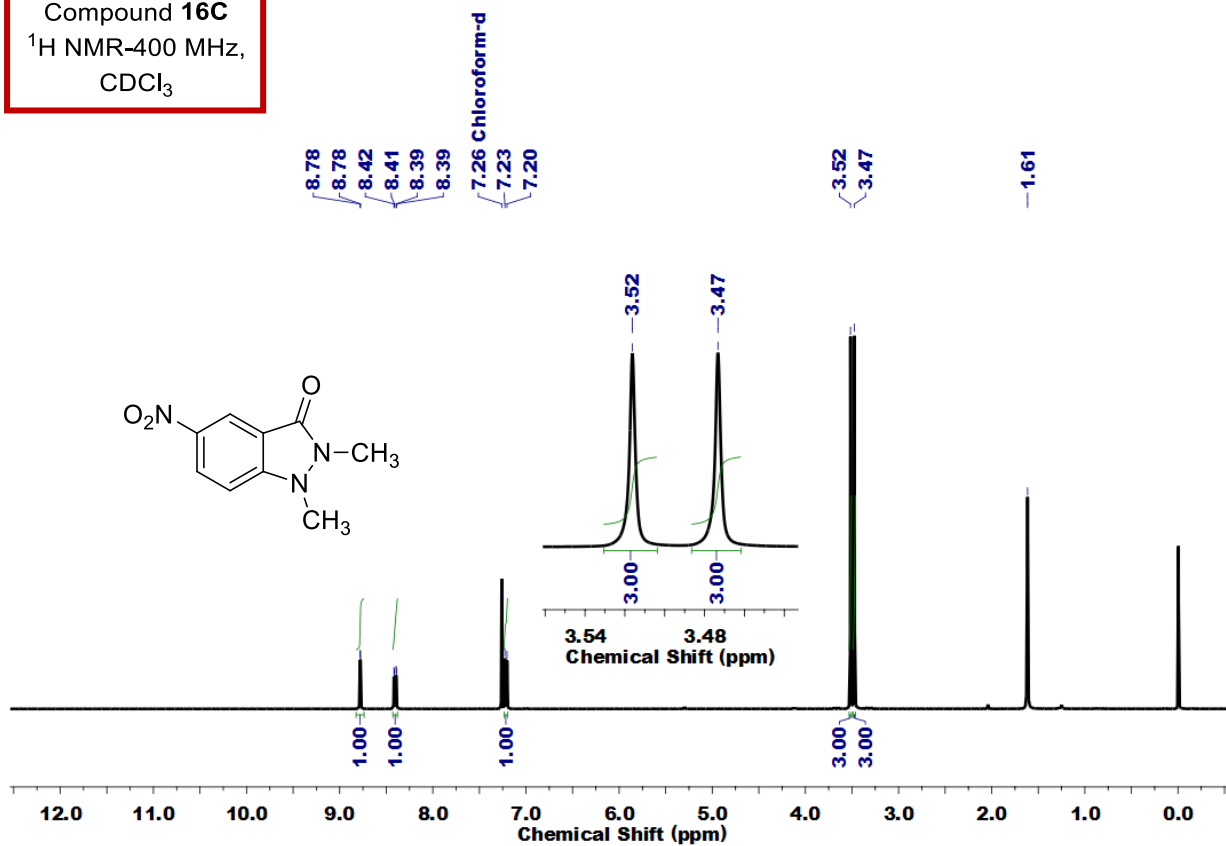

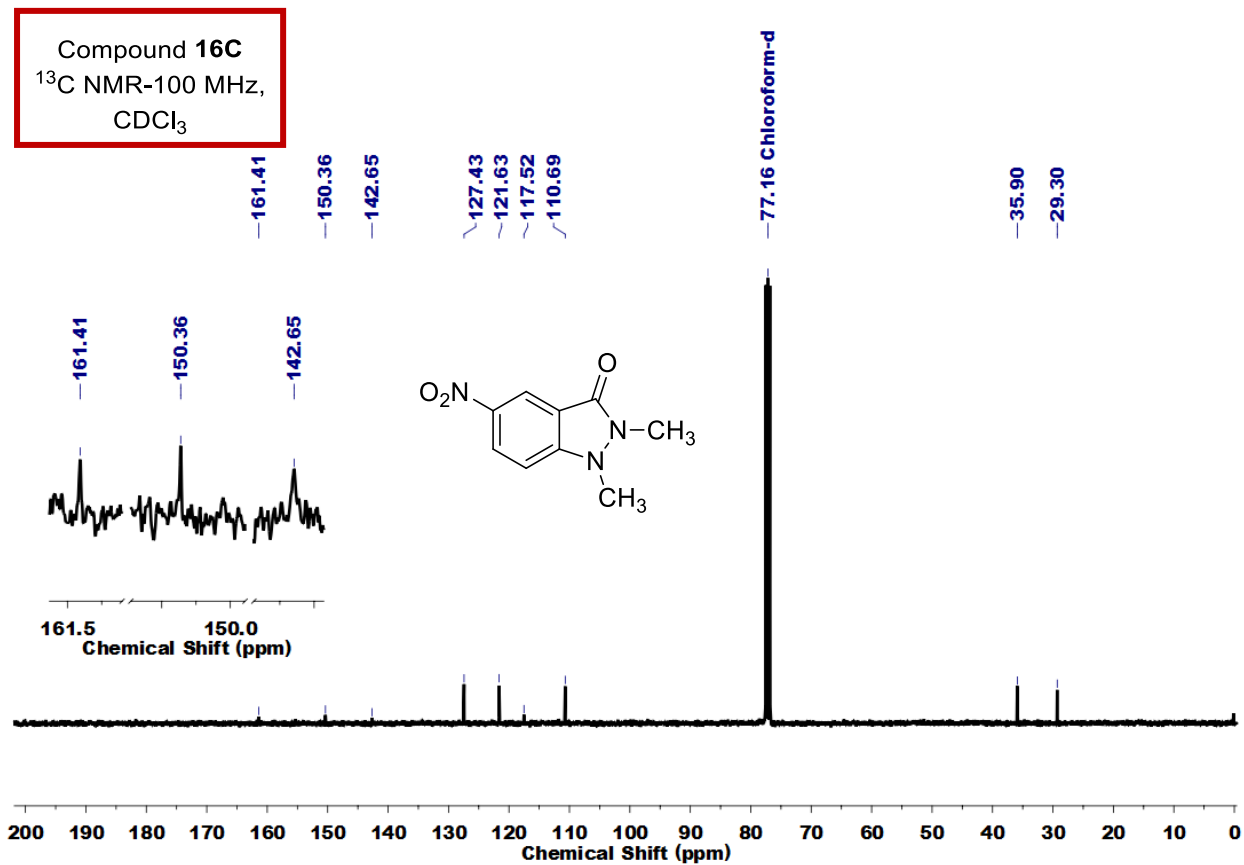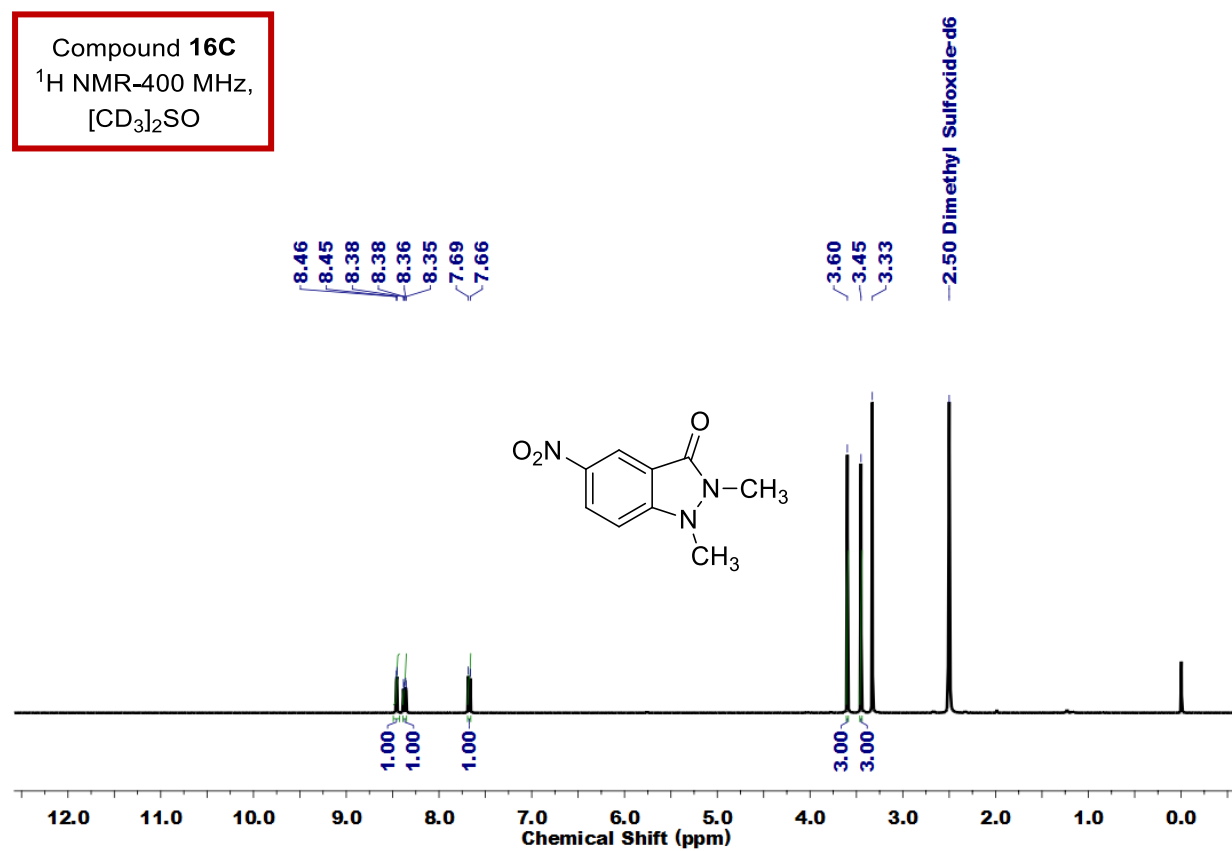

Compound **17C**  
 $^1\text{H}$  NMR-400 MHz,  
 $\text{CDCl}_3$

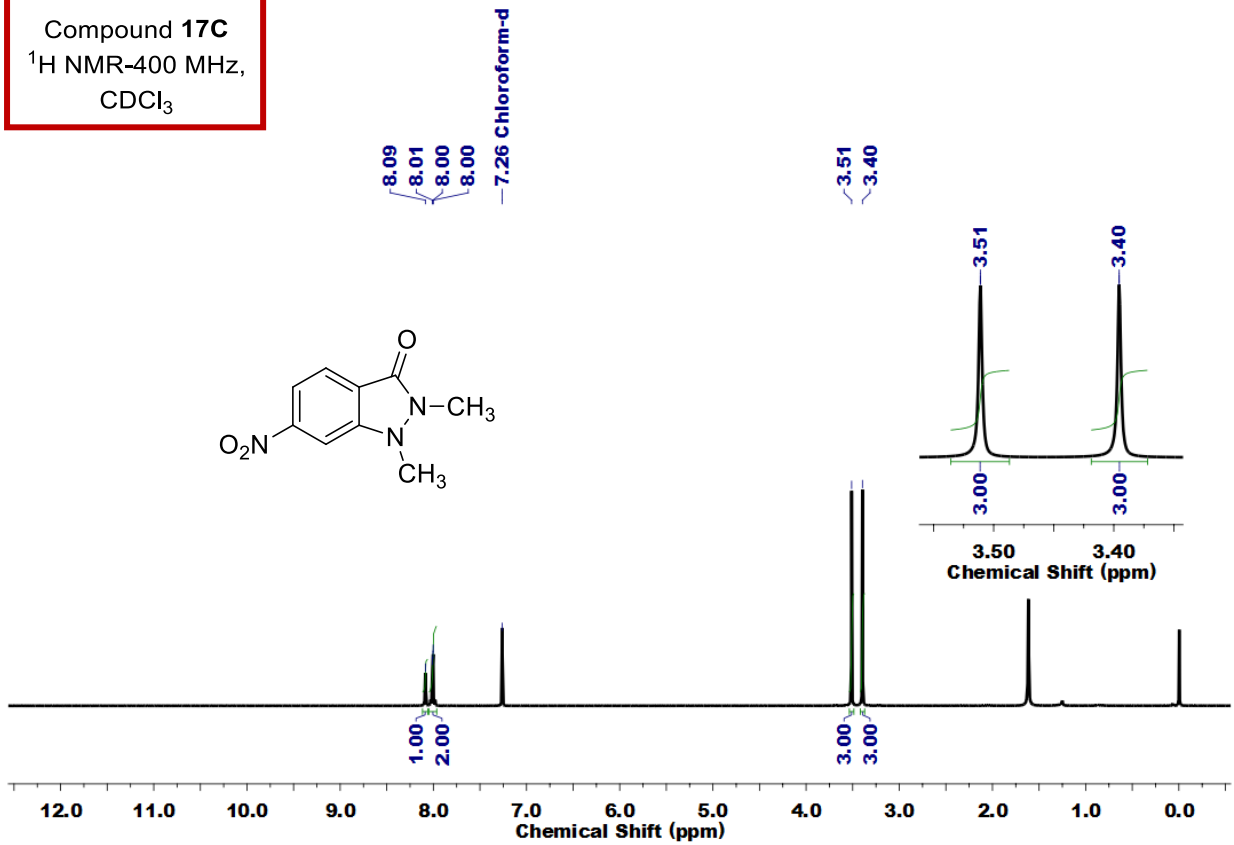

Compound **17C**  
 $^{13}\text{C}$  NMR-100 MHz,  
 $\text{CDCl}_3$

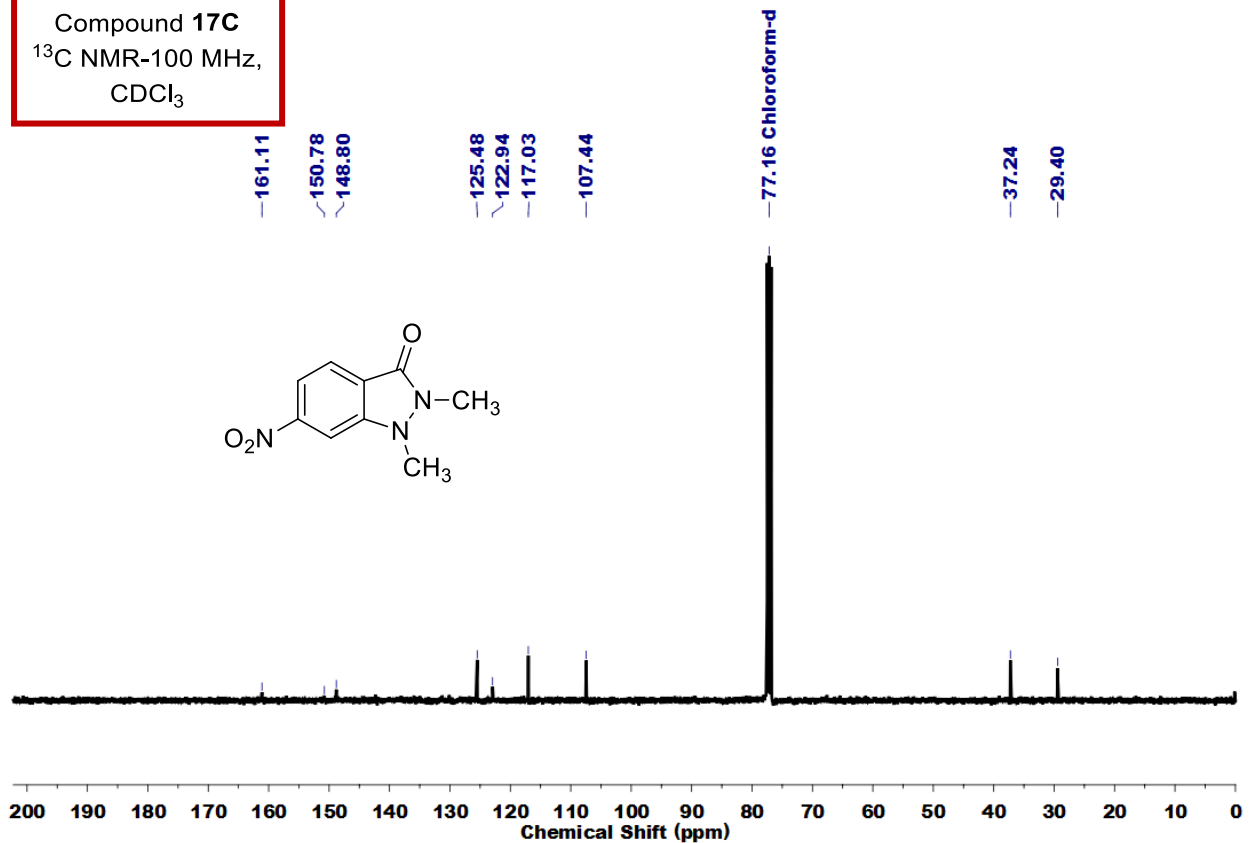

Compound **17C**  
 $^1\text{H}$  NMR-400 MHz,  
 $[\text{CD}_3]_2\text{SO}$

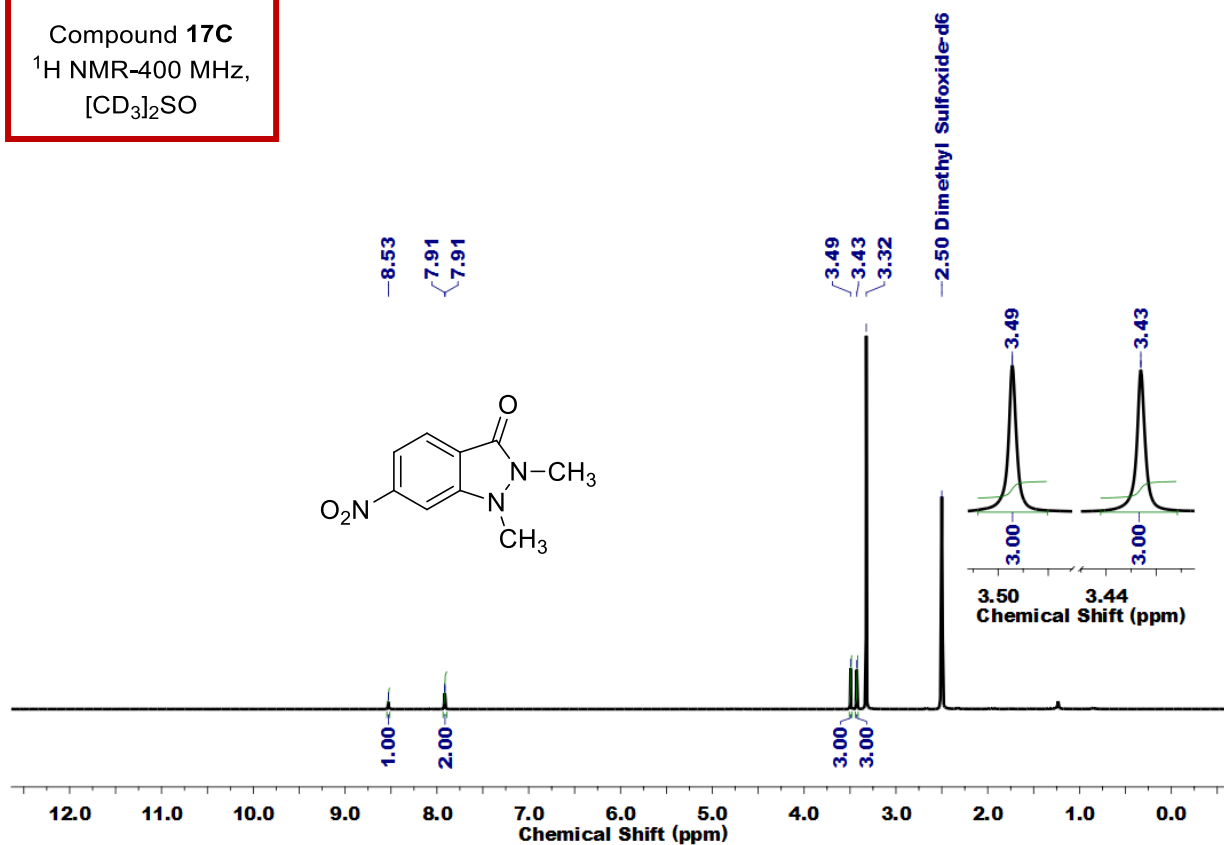

Compound **18C**  
 $^1\text{H}$  NMR-400 MHz,  
 $\text{CDCl}_3$

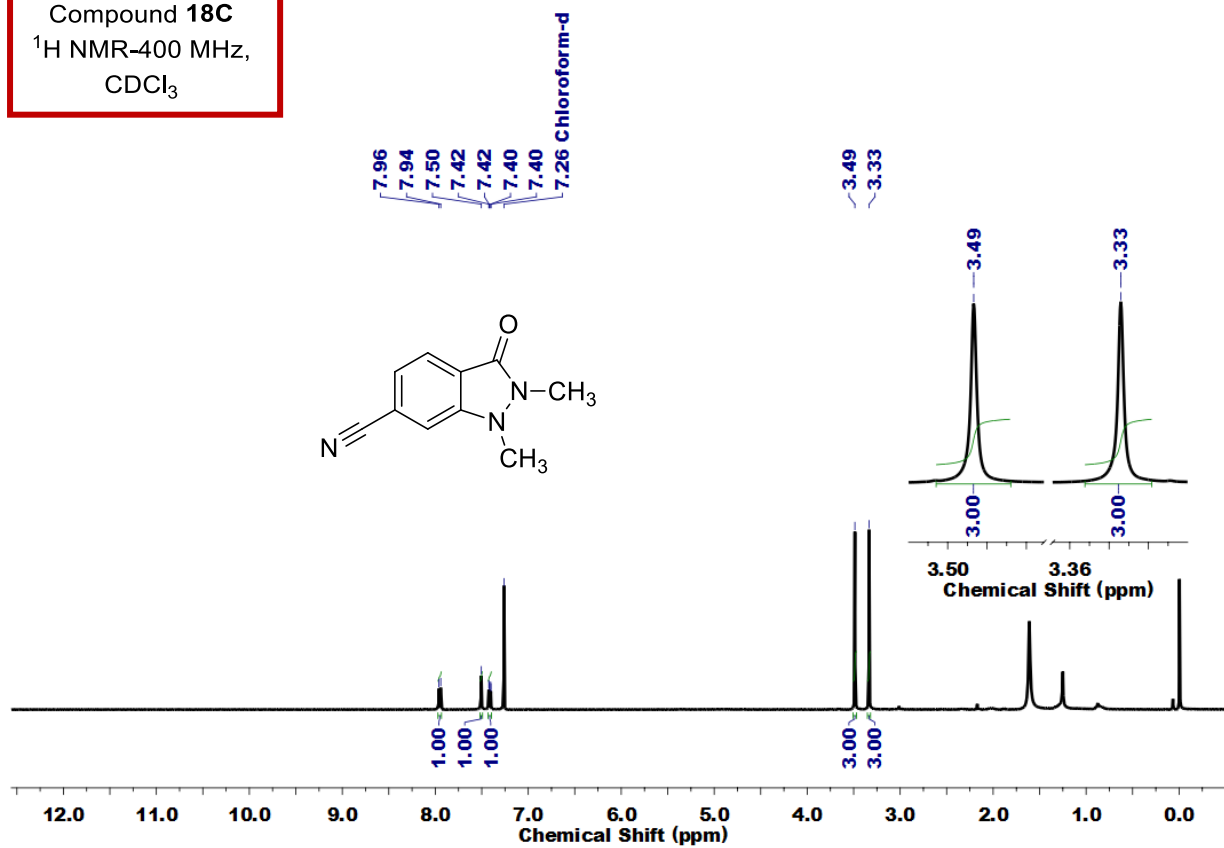

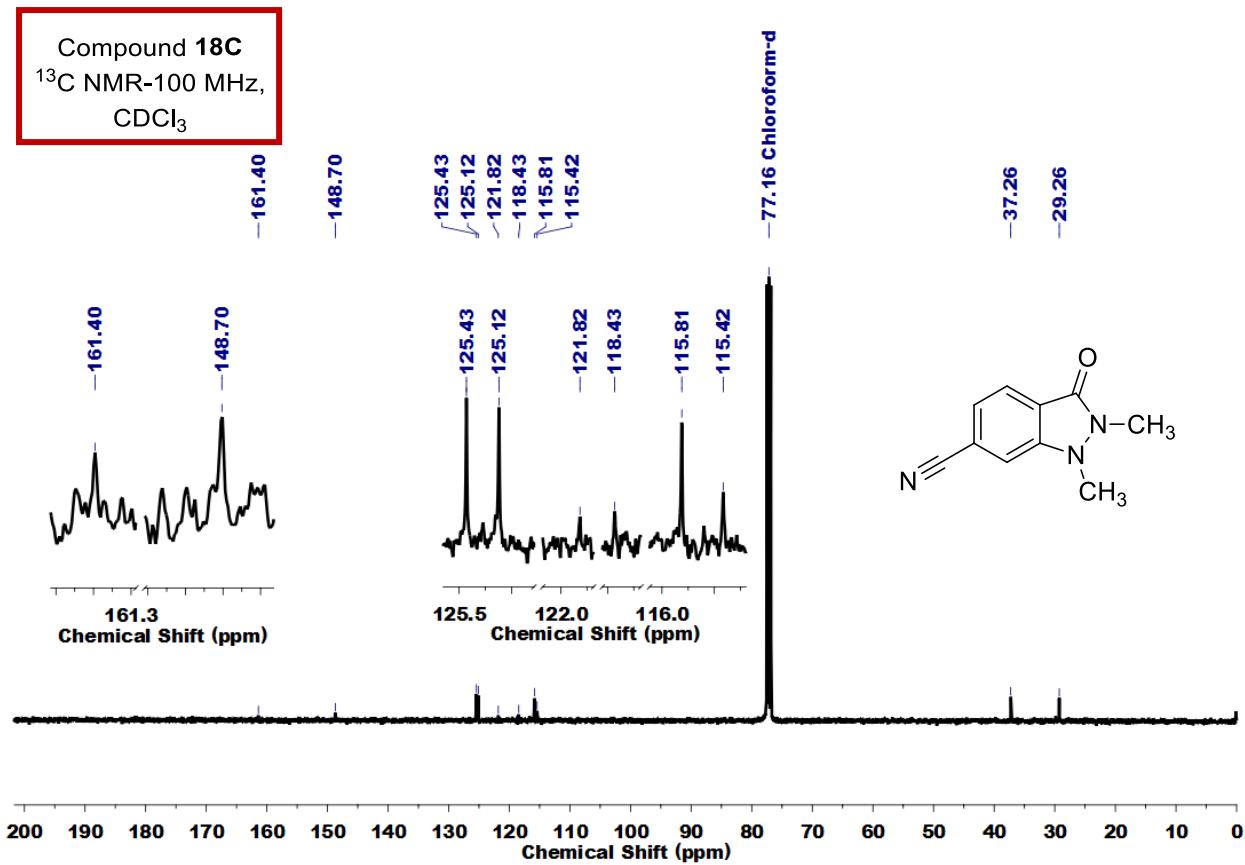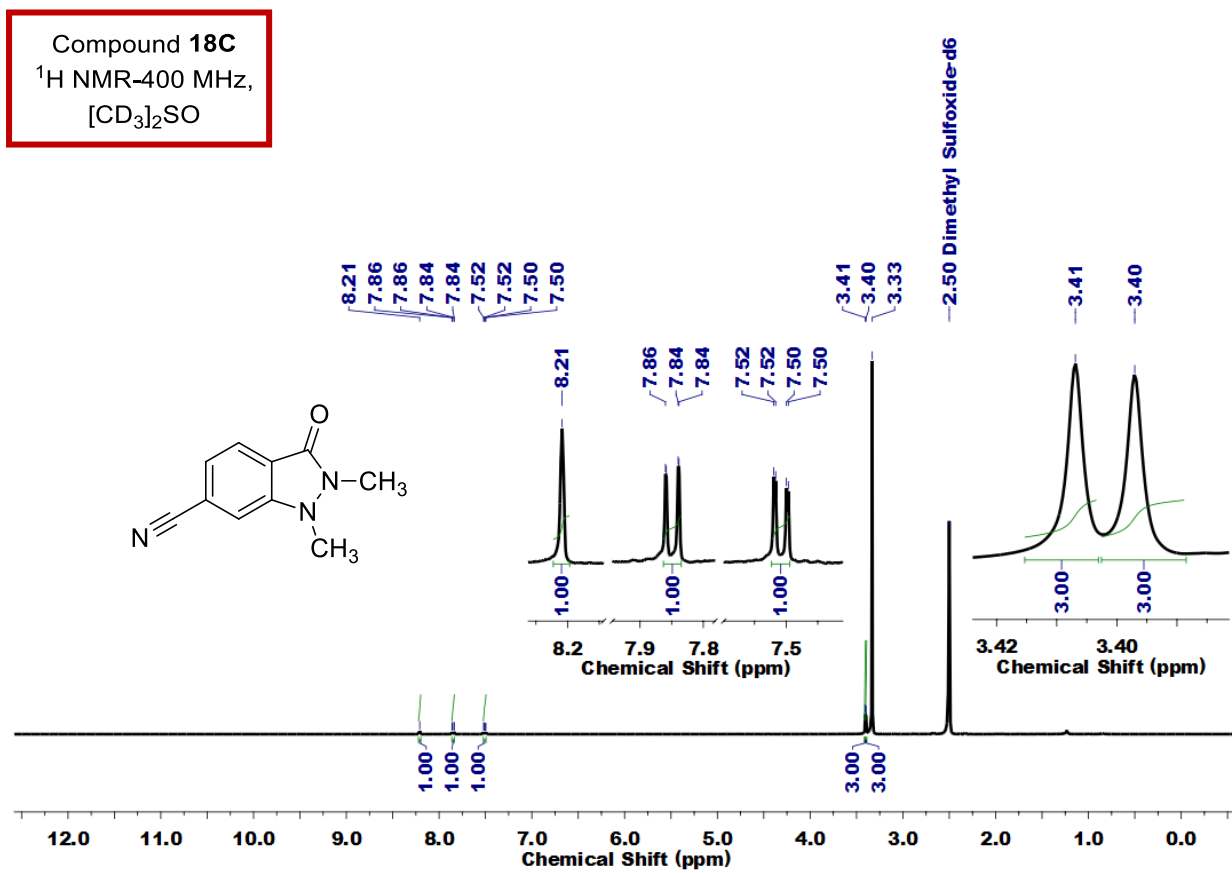

## K. References.

1. Bruker APEX 3, Version 2, User Manual S86 –EXS053 (Bruker AXS Inc., 2015).
2. Siemens, SMART system (Siemens Analytical X-ray Instruments Inc., 1995).
3. G. M. Sheldrick, SADABS (Bruker AXS Inc. 2007).
4. G. M. Sheldrick, *Acta Cryst. Sect. A*. 2008, **64** (1), 112–122.
5. I. J. Bruno, J. C. Cole, P. R. Edgington, M. Kessler, C. F. Macrae, P. McCabe, J. Pearson and R. Taylor, *Acta Crystallogr. Sect. B*. 2002, **58** (3), 389-397.
6. Gaussian 09, Revision D.01, M. J. Frisch, G. W. Trucks, H. B. Schlegel, G. E. Scuseria, M. A. Robb, J. R. Cheeseman, Jr., J. A. Montgomery, T. Vreven, K. N. Kudin, J. C. Burant, J. M. Millam, S. S. Iyengar, J. Tomasi, V. Barone, B. Mennucci, M. Cossi, G. Scalmani, N. Rega, G. A. Petersson, H. Nakatsuji, M. Hada, M. Ehara, K. Toyota, S35 R. Fukuda, J. Hasegawa, M. Ishida, T. Nakajima, Y. Honda, O. Kitao, H. Nakai, M. Klene, X. Li, J. E. Knox, H. P. Hratchian, J. B. Cross, C. Adamo, J. Jaramillo, R. Gomperts, R. E. Stratmann, O. Yazyev, A. J. Austin, R. Cammi, C. Pomelli, J. W. Ochterski, P. Y. Ayala, K. Morokuma, G. A. Voth, P. Salvador, J. J. Dannenberg, V. G. Zakrzewski, S. Dapprich, A. D. Daniels, M. C. Strain, O. Farkas, D. K. Malick, A. D. Rabuck, K. Raghavachari, J. B. Foresman, J. V. Ortiz, Q. Cui, A. G. Baboul, S. Clifford, J. Cioslowski, B. B. Stefanov, G. Liu, A. Liashenko, P. Piskorz, I. Komaromi, R. L. Martin, D. J. Fox, T. Keith, M. A. Al-Laham, C. Y. Peng, A. Nanayakkara, M. Challacombe, P. M. W. Gill, B. Johnson, W.; Chen, M. W. Wong, C. Gonzalez and J. A. Pople, Gaussian, Inc., Wallingford CT, 2013.
7. Y. Zhao and D. G. Truhlar, *Theor. Chem. Acc.* 2008, **120**, 215–241.
8. E. D. Glendening, A. E. Reed, J. E. Carpenter and J. Weinhold, NBO Version 3.1; University of Wisconsin: Madison.
9. E. R. Johnson, S. Keinan, M. -P. Sánchez, J. C. García, A. J. Cohen and W. Yang, *J. Am. Chem. Soc.* 2010, **132**, 6498-6506.

10. T. Lu and F. Chen, *J. Comput. Chem.* 2012, **33**, 580-592.
11. W. Humphrey, A. Dalke and K. Schulten, *J. Molec. Graphics*, 1996, **14**, 33-38.
12. <http://www.chemcraftprog.com>.
13. F. A. Carey and R. J. Sundberg, in *Advanced Organic Chemistry, Part A: Structure and Mechanisms*, 5<sup>th</sup> Ed. Springer US, 2007, pp. 336-339.
